# Supplementary material for: CD38+ Alveolar macrophages mediate early control of M. tuberculosis proliferation in the lung
Source: Research Square preprint supplement (doi:10.21203/rs.3.rs-3934768/v1), 2024-07-15
Supplement: Supplementary file 1 [file 0ef74261d66a5f4f2895bd9f.xlsx]

## Sheet: gProfiler_mmusculus_5-2-2024_11
			Pathways related to programmed cell death and autophagy are highlighted in purple
source	term_name	term_id	highlighted	adjusted_p_value	negative_log10_of_adjusted_p_value	term_size	query_size	intersection_size	effective_domain_size	intersections
GO:BP	positive regulation of biological process	GO:0048518	TRUE	3.591348068057461e-34	33.44474250166559	6589	433	229	26944	SLC8A1,CAMK1D,MITF,OSBPL8,ABCA1,CERS6,ETV6,PID1,IL31RA,GNAQ,FBXL5,NOS2,PHLPP1,TRAF3,AKT3,ACSL1,PTPRJ,FNIP2,EXOC4,ZEB2,TBC1D5,MAN2A1,MAML2,RAPGEF2,RERE,TNS3,CACNA1D,SMYD3,RREB1,HEXB,PLCL2,CD86,HDAC9,CREB5,RAB8B,SLCO3A1,PLEK,LRRK2,ARID1B,TANK,ZFP407,SASH1,SLC1A2,VAV3,ELL2,HTR7,ARG2,SIK3,NFE2L2,TMEM164,IRAK2,APP,PLA2G4A,RBM47,WWOX,RFTN1,PLA2G7,CLEC4D,ASAP1,PDPN,AMBRA1,FNIP1,BCAS3,RABGEF1,HIF1A,MPP7,…
GO:BP	biological regulation	GO:0065007	FALSE	4.950984874934469e-34	33.30530840041918	13527	433	345	26944	SLC8A1,CAMK1D,FMNL2,TRPS1,MITF,OSBPL8,CDK8,GPHN,ATRNL1,LDLRAD4,ABCA1,CERS6,ETV6,PID1,KPNA1,IL31RA,GNAQ,FBXL5,NOS2,PHLPP1,TRAF3,DENND1A,EXT1,MYO1E,AKT3,ACSL1,FBXL17,PTPRJ,AFF1,FNIP2,EXOC4,ARHGAP24,LRCH1,ABI1,SLC7A2,ZEB2,TBC1D5,MAN2A1,MAML2,PDE7B,RAPGEF2,RERE,TNS3,AOAH,CACNA1D,ARHGAP10,GNG12,LRRC8C,RNF149,SMYD3,SND1,RREB1,HEXB,PLCL2,CD86,HDAC9,CREB5,RAB8B,SLCO3A1,PLEK,SESTD1,ATG10,LRRK2,ARID1B,TANK…
GO:BP	regulation of biological process	GO:0050789	FALSE	5.895479913496368e-32	31.22948083598029	13144	433	336	26944	SLC8A1,CAMK1D,FMNL2,TRPS1,MITF,OSBPL8,CDK8,ATRNL1,LDLRAD4,ABCA1,CERS6,ETV6,PID1,KPNA1,IL31RA,GNAQ,FBXL5,NOS2,PHLPP1,TRAF3,DENND1A,EXT1,MYO1E,AKT3,ACSL1,FBXL17,PTPRJ,AFF1,FNIP2,EXOC4,ARHGAP24,LRCH1,ABI1,SLC7A2,ZEB2,TBC1D5,MAN2A1,MAML2,PDE7B,RAPGEF2,RERE,TNS3,AOAH,CACNA1D,ARHGAP10,GNG12,LRRC8C,RNF149,SMYD3,SND1,RREB1,HEXB,PLCL2,CD86,HDAC9,CREB5,RAB8B,SLCO3A1,PLEK,SESTD1,ATG10,LRRK2,ARID1B,TANK,ZFP4…
GO:BP	response to stress	GO:0006950	FALSE	4.065030477398044e-31	30.390936193952772	3936	433	166	26944	CAMK1D,ABCA1,CERS6,IL31RA,GNAQ,NOS2,TRAF3,EXT1,AKT3,PTPRJ,FNIP2,ARHGAP24,SLC7A2,ZEB2,TBC1D5,AOAH,LRRC8C,RREB1,CD86,PLEK,ATG10,LRRK2,ARID1B,TANK,SLC1A2,VAV3,HTR7,ARG2,PARP8,NFE2L2,IRAK2,APP,PLA2G4A,RBM47,DIAPH2,SAA3,RFTN1,PLA2G7,CLEC4D,PDPN,AMBRA1,MCTP1,FNIP1,BCAS3,SLC7A11,LRRC8D,RABGEF1,UVRAG,HIF1A,LARGE1,CD38,NEDD4L,JAK2,MALT1,CPEB4,SLC23A2,NRG1,IL1A,DYRK1A,DAPK1,SDC1,LYN,MRTFA,BABAM2,SLC2A1,MAP…
GO:BP	regulation of response to stimulus	GO:0048583	FALSE	5.361189727315041e-31	30.2707	3987	433	167	26944	CAMK1D,OSBPL8,LDLRAD4,ABCA1,PID1,KPNA1,GNAQ,PHLPP1,TRAF3,DENND1A,AKT3,FBXL17,PTPRJ,FNIP2,EXOC4,ARHGAP24,SLC7A2,ZEB2,RAPGEF2,TNS3,AOAH,RNF149,RREB1,PLCL2,CD86,PLEK,LRRK2,ARID1B,TANK,SASH1,VAV3,ARG2,SIK3,NFE2L2,IRAK2,APP,PLA2G4A,RBM47,DIAPH2,WWOX,JARID2,RFTN1,PLA2G7,CLEC4D,AMBRA1,MCTP1,FNIP1,SLC7A11,RABGEF1,RFFL,HIF1A,CD38,CYTH1,JAK2,MALT1,NRG1,IL1A,DYRK1A,DAPK1,CBLB,LYN,MRTFA,BABAM2,MAP4K4,PDE4B,S…
GO:BP	regulation of signaling	GO:0023051	FALSE	1.2110119181073957e-28	27.916851582750585	3616	433	154	26944	OSBPL8,LDLRAD4,ABCA1,PID1,KPNA1,GNAQ,NOS2,PHLPP1,TRAF3,DENND1A,AKT3,FBXL17,PTPRJ,FNIP2,EXOC4,ARHGAP24,ZEB2,RAPGEF2,TNS3,CACNA1D,RNF149,PLCL2,CD86,RAB8B,PLEK,LRRK2,TANK,SASH1,VAV3,HTR7,SIK3,NFE2L2,BTBD9,IRAK2,APP,RBM47,WWOX,CLEC4D,AMBRA1,MCTP1,FNIP1,SLC7A11,RABGEF1,APBA1,RFFL,HIF1A,LARGE1,CD38,CYTH1,JAK2,MALT1,NRG1,IL1A,DYRK1A,DAPK1,CBLB,LYN,MRTFA,BABAM2,MAP4K4,PDE4B,SRC,MBD5,ERN1,MOB3B,VEGFA,INHB…
GO:BP	regulation of cell communication	GO:0010646	FALSE	1.2110119181073957e-28	27.916851582750585	3616	433	154	26944	OSBPL8,LDLRAD4,ABCA1,PID1,KPNA1,GNAQ,NOS2,PHLPP1,TRAF3,DENND1A,AKT3,FBXL17,PTPRJ,FNIP2,EXOC4,ARHGAP24,ZEB2,RAPGEF2,TNS3,CACNA1D,RNF149,PLCL2,CD86,RAB8B,PLEK,LRRK2,TANK,SASH1,VAV3,HTR7,SIK3,NFE2L2,BTBD9,IRAK2,APP,RBM47,WWOX,CLEC4D,AMBRA1,MCTP1,FNIP1,SLC7A11,RABGEF1,APBA1,RFFL,HIF1A,LARGE1,CD38,CYTH1,JAK2,MALT1,NRG1,IL1A,DYRK1A,DAPK1,CBLB,LYN,MRTFA,BABAM2,MAP4K4,PDE4B,SRC,MBD5,ERN1,MOB3B,VEGFA,INHB…
GO:BP	anatomical structure development	GO:0048856	FALSE	5.011307233641499e-28	27.300048970679015	6269	433	211	26944	SLC8A1,CAMK1D,FMNL2,TRPS1,CMIP,MITF,LDLRAD4,CERS6,ETV6,KPNA1,IL31RA,GNAQ,PHLPP1,EXT1,MYO1E,AKT3,FBXL17,PTPRJ,EXOC4,ARHGAP24,ABI1,ZEB2,MAN2A1,RAPGEF2,RERE,TNS3,SMYD3,RREB1,HEXB,PLCL2,CD86,HDAC9,PLEK,LRRK2,ARID1B,SASH1,SLC1A2,VAV3,HTR7,ARG2,SIK3,NFE2L2,APP,CLMP,PLA2G4A,ST3GAL1,RBM47,DIAPH2,WWOX,JARID2,SGMS2,CLEC4D,ASAP1,PDPN,AMBRA1,FNIP1,BCAS3,SLC7A11,APBA1,HIF1A,LARGE1,CD38,CLIC4,NEDD4L,TPD52,JAK2…
GO:BP	regulation of multicellular organismal process	GO:0051239	FALSE	1.4509781991361437e-27	26.838339112762817	3165	433	141	26944	SLC8A1,MITF,LDLRAD4,ABCA1,GNAQ,NOS2,TRAF3,AKT3,ACSL1,PTPRJ,SLC7A2,ZEB2,MAN2A1,RAPGEF2,CACNA1D,RREB1,PLCL2,CD86,HDAC9,RAB8B,PLEK,LRRK2,ARID1B,TANK,SASH1,VAV3,HTR7,ARG2,NFE2L2,APP,PLA2G4A,RBM47,JARID2,SGMS2,RFTN1,CLEC4D,PDPN,AMBRA1,BCAS3,RABGEF1,HIF1A,CD38,JAK2,MALT1,NRG1,IL1A,CBLB,LYN,IFRD1,B4GALT5,PDE4B,SRC,MBD5,SGPL1,AP3B1,VEGFA,INHBA,BCL6,FOXP4,CD274,ESR1,FOXO3,HSPH1,SH3KBP1,STK3,SRGN,ZFP516,RF…
GO:BP	intracellular signal transduction	GO:0035556	FALSE	3.4941699664342724e-27	26.45665597351188	2610	433	126	26944	OSBPL8,LDLRAD4,ABCA1,NOS2,PHLPP1,TRAF3,DENND1A,AKT3,PTPRJ,FNIP2,EXOC4,ARHGAP24,PDE7B,RAPGEF2,TNS3,CACNA1D,RNF149,PLCL2,CD86,PLEK,LRRK2,TANK,SASH1,VAV3,RASGEF1B,SIK3,NFE2L2,IRAK2,APP,WWOX,CLEC4D,PDPN,AMBRA1,FNIP1,RABGEF1,RFFL,HIF1A,CYTH1,JAK2,MALT1,NRG1,ELMO1,IL1A,DYRK1A,DAPK1,CBLB,LYN,BABAM2,SRC,ERN1,MOB3B,VEGFA,INHBA,BCL6,RHOQ,ESR1,MDFIC,FOXO3,RALGPS1,STK3,SOD2,MAP4K3,ACVR2A,MAP2K4,PTEN,SIPA1L1,…
GO:BP	regulation of signal transduction	GO:0009966	FALSE	5.161252137809491e-27	26.287244924230844	3005	433	136	26944	OSBPL8,LDLRAD4,ABCA1,PID1,KPNA1,GNAQ,PHLPP1,TRAF3,DENND1A,AKT3,FBXL17,PTPRJ,FNIP2,EXOC4,ARHGAP24,ZEB2,RAPGEF2,TNS3,RNF149,PLCL2,CD86,PLEK,LRRK2,TANK,SASH1,VAV3,SIK3,NFE2L2,IRAK2,APP,RBM47,WWOX,CLEC4D,AMBRA1,FNIP1,RABGEF1,RFFL,HIF1A,CYTH1,JAK2,MALT1,NRG1,IL1A,DYRK1A,DAPK1,CBLB,LYN,MRTFA,BABAM2,PDE4B,SRC,MBD5,ERN1,MOB3B,VEGFA,INHBA,BCL6,ESR1,MDFIC,FOXO3,NXN,RALGPS1,STK3,SOD2,CTSS,TNFAIP6,TNKS,ACVR2…
GO:BP	positive regulation of cellular process	GO:0048522	FALSE	6.0499304306787594e-27	26.21824961935514	6078	433	205	26944	CAMK1D,MITF,OSBPL8,ABCA1,CERS6,ETV6,PID1,IL31RA,GNAQ,NOS2,PHLPP1,TRAF3,AKT3,ACSL1,PTPRJ,FNIP2,EXOC4,ZEB2,TBC1D5,MAN2A1,MAML2,RAPGEF2,RERE,TNS3,CACNA1D,SMYD3,RREB1,HEXB,CD86,HDAC9,CREB5,RAB8B,SLCO3A1,PLEK,LRRK2,ARID1B,TANK,ZFP407,SASH1,SLC1A2,VAV3,ELL2,HTR7,ARG2,SIK3,NFE2L2,TMEM164,APP,PLA2G4A,RBM47,WWOX,RFTN1,PLA2G7,CLEC4D,ASAP1,PDPN,AMBRA1,FNIP1,BCAS3,HIF1A,MPP7,LARGE1,CD38,NEDD4L,TPD52,JAK2,MAL…
GO:BP	developmental process	GO:0032502	FALSE	9.649910794097256e-27	26.015476701351584	6854	433	220	26944	LRMDA,SLC8A1,CAMK1D,FMNL2,TRPS1,CMIP,MITF,OSBPL8,LDLRAD4,CERS6,ETV6,KPNA1,IL31RA,GNAQ,PHLPP1,EXT1,MYO1E,AKT3,FBXL17,PTPRJ,EXOC4,ARHGAP24,ABI1,ZEB2,MAN2A1,RAPGEF2,RERE,TNS3,LRRC8C,SMYD3,RREB1,HEXB,PLCL2,CD86,HDAC9,PLEK,LRRK2,ARID1B,SASH1,SLC1A2,VAV3,HTR7,ARG2,SIK3,NFE2L2,APP,CLMP,PLA2G4A,ST3GAL1,RBM47,DIAPH2,WWOX,JARID2,SGMS2,CLEC4D,ASAP1,PDPN,AMBRA1,FNIP1,BCAS3,SLC7A11,APBA1,HIF1A,LARGE1,CD38,CLI…
GO:BP	regulation of cellular process	GO:0050794	FALSE	1.196700909529457e-26	25.922014378893223	12593	433	318	26944	CAMK1D,TRPS1,MITF,OSBPL8,CDK8,ATRNL1,LDLRAD4,ABCA1,CERS6,ETV6,PID1,KPNA1,IL31RA,GNAQ,NOS2,PHLPP1,TRAF3,DENND1A,EXT1,MYO1E,AKT3,ACSL1,FBXL17,PTPRJ,AFF1,FNIP2,EXOC4,ARHGAP24,LRCH1,ABI1,SLC7A2,ZEB2,TBC1D5,MAN2A1,MAML2,PDE7B,RAPGEF2,RERE,TNS3,CACNA1D,ARHGAP10,GNG12,LRRC8C,RNF149,SMYD3,SND1,RREB1,HEXB,PLCL2,CD86,HDAC9,CREB5,RAB8B,SLCO3A1,PLEK,SESTD1,ATG10,LRRK2,ARID1B,TANK,ZFP407,SASH1,SLC1A2,VAV3,ELL…
GO:BP	organonitrogen compound metabolic process	GO:1901564	FALSE	2.3286115880560735e-26	25.6329	5744	433	197	26944	CAMK1D,CDK8,GPHN,ABCA1,CERS6,PID1,IL31RA,FBXL5,NOS2,PHLPP1,TRAF3,EXT1,AKT3,ACSL1,FBXL17,PTPRJ,FNIP2,MAN2A1,PDE7B,RAPGEF2,RNF149,SMYD3,FARS2,HEXB,CD86,SLCO3A1,ATG10,LRRK2,TANK,SASH1,SLC1A2,ARG2,SIK3,PARP8,NFE2L2,BTBD9,IRAK2,MAN1A,TACO1,APP,PLA2G4A,ST3GAL1,SGMS2,PLA2G7,AMBRA1,FNIP1,SLC7A11,RABGEF1,RFFL,HIF1A,LARGE1,PPM1H,RNF217,NEDD4L,JAK2,MALT1,CPEB4,CPQ,NRG1,DYRK1A,DAPK1,CBLB,LYN,BABAM2,RYBP,CARM…
GO:BP	cell migration	GO:0016477	FALSE	4.156862121992761e-25	24.38123438026905	1538	433	92	26944	CAMK1D,FMNL2,MITF,OSBPL8,LDLRAD4,EXT1,AKT3,PTPRJ,ARHGAP24,LRCH1,ZEB2,RAPGEF2,RERE,TNS3,RREB1,HEXB,HDAC9,LRRK2,SASH1,VAV3,NFE2L2,APP,SAA3,PLA2G7,PDPN,MCTP1,BCAS3,RABGEF1,RFFL,HIF1A,LARGE1,CLIC4,JAK2,NRG1,IL1A,SDC1,LYN,MRTFA,CARMIL1,PDE4B,SRC,SGPL1,SRGAP2,VEGFA,NRP2,MYO5A,CD274,FOXO3,SH3KBP1,SOD2,TNFAIP6,PTEN,BRAF,SPECC1L,DOCK1,MGAT5,PPARD,MIF,MET,NTNG2,ASTN2,ADAM9,IQSEC1,PEAK1,GPNMB,ZFP609,ITGAV,A…
GO:BP	cellular response to chemical stimulus	GO:0070887	FALSE	3.1267956540109325e-24	23.50490050034815	3162	433	135	26944	CAMK1D,OSBPL8,ABCA1,PID1,IL31RA,GNAQ,NOS2,TRAF3,AKT3,ACSL1,ABTB2,PTPRJ,LRCH1,RAPGEF2,CACNA1D,LRRC8C,RNF149,SMYD3,CD86,HDAC9,LRRK2,ARID1B,TANK,SASH1,SLC1A2,VAV3,HTR7,PARP8,NFE2L2,IRAK2,APP,PLA2G4A,RBM47,JARID2,SAA3,PLA2G7,LY6I,BCAS3,SLC7A11,LRRC8D,RABGEF1,RFFL,HIF1A,LARGE1,CLIC4,JAK2,MALT1,CPEB4,SLC23A2,IL1A,DAPK1,LYN,SLC2A1,MAP4K4,PDE4B,SRC,MBD5,ERN1,VEGFA,INHBA,NRP2,MYO5A,CD274,RHOQ,ESR1,FOXO3,N…
GO:BP	response to stimulus	GO:0050896	FALSE	3.258757933458992e-24	23.486947898530705	10506	433	280	26944	SLC8A1,CAMK1D,MITF,OSBPL8,GPHN,ATRNL1,LDLRAD4,ABCA1,CERS6,PID1,KPNA1,IL31RA,GNAQ,NOS2,PHLPP1,TRAF3,DENND1A,EXT1,MYO1E,AKT3,ACSL1,ABTB2,FBXL17,PTPRJ,FNIP2,EXOC4,ARHGAP24,LRCH1,ABI1,SLC7A2,ZEB2,TBC1D5,MAML2,PDE7B,RAPGEF2,TNS3,AOAH,CACNA1D,ARHGAP10,GNG12,LRRC8C,RNF149,SMYD3,RREB1,PLCL2,CD86,HDAC9,PLEK,ATG10,LRRK2,ARID1B,TANK,SASH1,SLC1A2,VAV3,RASGEF1B,HTR7,ARG2,SIK3,PARP8,NFE2L2,IRAK2,APP,PLA2G4A,ST…
GO:BP	positive regulation of response to stimulus	GO:0048584	FALSE	1.856258987233914e-23	22.731361430660385	2359	433	113	26944	CAMK1D,OSBPL8,PHLPP1,TRAF3,AKT3,PTPRJ,FNIP2,EXOC4,ZEB2,RAPGEF2,TNS3,RREB1,PLCL2,CD86,LRRK2,ARID1B,SASH1,VAV3,SIK3,NFE2L2,IRAK2,APP,PLA2G4A,RBM47,WWOX,RFTN1,PLA2G7,CLEC4D,AMBRA1,FNIP1,RABGEF1,HIF1A,CD38,JAK2,MALT1,NRG1,IL1A,CBLB,LYN,BABAM2,PDE4B,SRC,MBD5,ERN1,AP3B1,VEGFA,INHBA,MYO5A,CD274,ESR1,FOXO3,STK3,CTSS,CLEC4E,TNKS,ACVR2A,MAP2K4,PTEN,TEC,BRAF,SPECC1L,NCOA2,MGAT5,PPARD,NFAT5,PDE8A,MIF,OASL1,M…
GO:BP	cell motility	GO:0048870	FALSE	2.4656843270700236e-23	22.60806252538307	1760	433	96	26944	CAMK1D,FMNL2,MITF,OSBPL8,LDLRAD4,EXT1,AKT3,PTPRJ,ARHGAP24,LRCH1,ZEB2,RAPGEF2,RERE,TNS3,RREB1,HEXB,HDAC9,LRRK2,SASH1,VAV3,NFE2L2,APP,SAA3,PLA2G7,PDPN,MCTP1,BCAS3,RABGEF1,RFFL,HIF1A,LARGE1,CLIC4,JAK2,NRG1,ELMO1,IL1A,SDC1,LYN,MRTFA,CARMIL1,PDE4B,SRC,SGPL1,SRGAP2,VEGFA,BCL6,NRP2,MYO5A,CD274,FOXO3,SH3KBP1,SOD2,RFX3,TNFAIP6,PTEN,BRAF,SPECC1L,DOCK1,MGAT5,PPARD,MIF,MET,NTNG2,ASTN2,ADAM9,IQSEC1,PEAK1,GPNM…
GO:BP	regulation of immune system process	GO:0002682	FALSE	4.9436913691185874e-23	22.305948649746213	1575	433	90	26944	CAMK1D,MITF,PHLPP1,TRAF3,PTPRJ,LRCH1,SLC7A2,PLCL2,CD86,LRRK2,ARID1B,VAV3,ARG2,NFE2L2,IRAK2,APP,PLA2G4A,RBM47,RFTN1,PLA2G7,CLEC4D,AMBRA1,SLC7A11,RABGEF1,HIF1A,CD38,JAK2,MALT1,IL1A,CBLB,LYN,PDE4B,SRC,AP3B1,VEGFA,INHBA,BCL6,CD274,ESR1,FOXO3,HSPH1,SH3KBP1,TNFAIP6,ATP11C,CLEC4E,ACVR2A,PTEN,TEC,BRAF,ORM1,MIF,OASL1,GPNMB,ZFP609,C3,NFKBIZ,SH2B2,TNIP1,PAG1,H2-M2,RGCC,JAG1,PIK3R1,CMKLR1,SDC4,NLRP3,PTPN2,FP…
GO:BP	cell communication	GO:0007154	FALSE	1.1622065105078446e-21	20.934716696037402	7582	433	223	26944	SLC8A1,MITF,OSBPL8,ATRNL1,LDLRAD4,ABCA1,PID1,KPNA1,IL31RA,GNAQ,NOS2,PHLPP1,TRAF3,DENND1A,EXT1,MYO1E,AKT3,ACSL1,FBXL17,PTPRJ,FNIP2,EXOC4,ARHGAP24,ABI1,ZEB2,MAML2,PDE7B,RAPGEF2,TNS3,CACNA1D,ARHGAP10,GNG12,LRRC8C,RNF149,PLCL2,CD86,RAB8B,PLEK,ATG10,LRRK2,TANK,SASH1,SLC1A2,VAV3,RASGEF1B,HTR7,SIK3,PARP8,NFE2L2,BTBD9,IRAK2,APP,PLA2G4A,RBM47,DIAPH2,WWOX,RFTN1,CLEC4D,PDPN,AMBRA1,LY6I,MCTP1,FNIP1,BCAS3,SLC…
GO:BP	regulation of intracellular signal transduction	GO:1902531	FALSE	1.5749174204942396e-21	20.802742213153046	1722	433	92	26944	OSBPL8,LDLRAD4,ABCA1,PHLPP1,TRAF3,DENND1A,AKT3,PTPRJ,FNIP2,EXOC4,ARHGAP24,RAPGEF2,TNS3,RNF149,CD86,LRRK2,TANK,SASH1,VAV3,SIK3,NFE2L2,APP,CLEC4D,AMBRA1,FNIP1,RABGEF1,RFFL,HIF1A,CYTH1,JAK2,NRG1,IL1A,DYRK1A,LYN,BABAM2,SRC,ERN1,MOB3B,VEGFA,INHBA,BCL6,ESR1,MDFIC,RALGPS1,STK3,SOD2,ACVR2A,MAP2K4,PTEN,SIPA1L1,BRAF,SPECC1L,GRINA,PPARD,NFAT5,PDE8A,ITPR1,MIF,MET,IQSEC1,GPNMB,ITGAV,C3,PSAP,MDM2,FRS2,SH2B2,TN…
GO:BP	intracellular signaling cassette	GO:0141124	FALSE	1.774123258459999e-21	20.751016210541806	1794	433	94	26944	OSBPL8,LDLRAD4,ABCA1,NOS2,PHLPP1,TRAF3,DENND1A,PTPRJ,EXOC4,ARHGAP24,PDE7B,RAPGEF2,TNS3,CACNA1D,RNF149,CD86,LRRK2,TANK,SASH1,VAV3,RASGEF1B,IRAK2,APP,CLEC4D,PDPN,AMBRA1,RABGEF1,CYTH1,JAK2,MALT1,NRG1,ELMO1,IL1A,LYN,SRC,ERN1,VEGFA,INHBA,BCL6,RHOQ,ESR1,MDFIC,RALGPS1,STK3,MAP4K3,ACVR2A,MAP2K4,PTEN,SIPA1L1,BRAF,SPECC1L,DOCK1,PPARD,NFAT5,PDE8A,ITPR1,MIF,MET,IQSEC1,GPNMB,ITGAV,C3,PSAP,FRS2,SH2B2,TRPM2,TNI…
GO:BP	immune system process	GO:0002376	FALSE	2.9229153919973385e-21	20.53418375574092	2819	433	121	26944	CAMK1D,MITF,IL31RA,NOS2,PHLPP1,TRAF3,EXT1,PTPRJ,LRCH1,SLC7A2,PLCL2,CD86,RAB8B,LRRK2,ARID1B,VAV3,ARG2,NFE2L2,IRAK2,APP,PLA2G4A,ST3GAL1,RBM47,JARID2,RFTN1,PLA2G7,CLEC4D,PDPN,AMBRA1,FNIP1,SLC7A11,RABGEF1,HIF1A,CD38,TPD52,JAK2,MALT1,IL1A,DAPK1,ALCAM,CBLB,LYN,PDE4B,SRC,AP3B1,FTH1,VEGFA,INHBA,BCL6,CD274,ESR1,FOXO3,HSPH1,SH3KBP1,CTSS,TNFAIP6,ATP11C,CLEC4E,ACVR2A,PTEN,TEC,BRAF,JAK1,ORM1,MIF,OASL1,P2RY14,…
GO:BP	cell activation	GO:0001775	FALSE	4.253945701948932e-21	20.37120805780293	1160	433	74	26944	KPNA1,GNAQ,PTPRJ,SLC7A2,ZEB2,PLCL2,CD86,PLEK,LRRK2,ARID1B,VAV3,ARG2,APP,PLA2G4A,ST3GAL1,CLEC4D,PDPN,AMBRA1,FNIP1,SLC7A11,RABGEF1,CD38,TPD52,JAK2,MALT1,IL1A,CBLB,LYN,AP3B1,BCL6,CD274,FOXO3,HSPH1,SH3KBP1,ATP11C,CLEC4E,ENTPD1,PTEN,TEC,BRAF,MIF,ADAM9,GPNMB,ZFP609,ITGAV,PSAP,GCLC,MDM2,NFKBIZ,PAG1,H2-M2,RGCC,PIK3R1,SDC4,NLRP3,TGFBR1,PTPN2,CFB,NOD2,RIPK2,ITGAM,DCSTAMP,CST7,TRAF6,IRS2,TREM2,HMOX1,UBD,SLC…
GO:BP	multicellular organism development	GO:0007275	FALSE	4.259061485953263e-21	20.37068609018747	4879	433	168	26944	SLC8A1,CAMK1D,TRPS1,CMIP,MITF,CERS6,ETV6,GNAQ,PHLPP1,EXT1,MYO1E,AKT3,FBXL17,PTPRJ,EXOC4,ARHGAP24,ABI1,ZEB2,MAN2A1,RAPGEF2,RERE,TNS3,HEXB,CD86,HDAC9,LRRK2,ARID1B,SASH1,SLC1A2,VAV3,HTR7,ARG2,SIK3,NFE2L2,APP,CLMP,PLA2G4A,DIAPH2,WWOX,JARID2,SGMS2,ASAP1,PDPN,AMBRA1,BCAS3,SLC7A11,APBA1,HIF1A,LARGE1,CD38,CLIC4,NEDD4L,JAK2,MALT1,VPS13B,SLC23A2,NRG1,IL1A,ALCAM,SDC1,CBLB,LYN,MRTFA,LHFPL2,SLC2A1,IFRD1,B4GAL…
GO:BP	system development	GO:0048731	FALSE	6.287645451559758e-21	20.20151195532303	4117	433	151	26944	CAMK1D,TRPS1,MITF,CERS6,ETV6,GNAQ,PHLPP1,EXT1,MYO1E,AKT3,FBXL17,PTPRJ,EXOC4,ARHGAP24,ABI1,ZEB2,MAN2A1,RAPGEF2,RERE,TNS3,HEXB,CD86,HDAC9,LRRK2,SASH1,SLC1A2,VAV3,HTR7,ARG2,SIK3,NFE2L2,APP,CLMP,PLA2G4A,DIAPH2,WWOX,JARID2,ASAP1,PDPN,AMBRA1,BCAS3,SLC7A11,HIF1A,LARGE1,CD38,CLIC4,NEDD4L,JAK2,MALT1,VPS13B,SLC23A2,NRG1,IL1A,ALCAM,SDC1,CBLB,LYN,MRTFA,SLC2A1,IFRD1,B4GALT5,MAP4K4,SRC,MBD5,FNDC3A,SPATA5,SGPL1…
GO:BP	response to oxygen-containing compound	GO:1901700	FALSE	6.388315924953568e-21	20.19461361459502	2077	433	101	26944	OSBPL8,ABCA1,PID1,GNAQ,NOS2,EXT1,AKT3,ACSL1,PTPRJ,RAPGEF2,CACNA1D,SMYD3,CD86,HDAC9,LRRK2,ARID1B,SASH1,SLC1A2,HTR7,NFE2L2,IRAK2,APP,LY6I,HIF1A,LARGE1,CD38,JAK2,MALT1,CPEB4,SLC23A2,IL1A,DAPK1,SDC1,LYN,SLC2A1,MAP4K4,PDE4B,SRC,MBD5,ERN1,INHBA,MYO5A,CD274,RHOQ,ESR1,FOXO3,SOD2,CPEB2,KPNA4,MAP2K4,HDAC8,PTEN,BRAF,NCOA2,TCF12,PPARD,NFAT5,PRDX5,BNIP3,ITPR1,MIF,APOBEC1,LY6C2,MET,ADAM9,ITGAV,GRAMD1B,PSAP,GCL…
GO:BP	multicellular organismal process	GO:0032501	FALSE	8.471176525809713e-21	20.072056268160097	9132	433	249	26944	SLC8A1,CAMK1D,TRPS1,CMIP,MITF,LDLRAD4,ABCA1,CERS6,ETV6,KPNA1,GNAQ,FBXL5,NOS2,PHLPP1,TRAF3,EXT1,MYO1E,AKT3,ACSL1,FBXL17,PTPRJ,EXOC4,ARHGAP24,ABI1,SLC7A2,ZEB2,MAN2A1,RAPGEF2,RERE,TNS3,CACNA1D,RREB1,HEXB,PLCL2,CD86,HDAC9,RAB8B,PLEK,LRRK2,ARID1B,TANK,SASH1,SLC1A2,VAV3,HTR7,ARG2,SIK3,NFE2L2,BTBD9,TACO1,APP,CLMP,PLA2G4A,ST3GAL1,RBM47,DIAPH2,WWOX,JARID2,SGMS2,RFTN1,PLA2G7,CLEC4D,ASAP1,PDPN,VTI1A,AMBRA1,…
GO:BP	cellular response to stimulus	GO:0051716	FALSE	1.1471324718853025e-20	19.940386426486917	8752	433	242	26944	CAMK1D,MITF,OSBPL8,ATRNL1,LDLRAD4,ABCA1,PID1,KPNA1,IL31RA,GNAQ,NOS2,PHLPP1,TRAF3,DENND1A,EXT1,MYO1E,AKT3,ACSL1,ABTB2,FBXL17,PTPRJ,FNIP2,EXOC4,ARHGAP24,LRCH1,ABI1,ZEB2,MAML2,PDE7B,RAPGEF2,TNS3,CACNA1D,ARHGAP10,GNG12,LRRC8C,RNF149,SMYD3,PLCL2,CD86,HDAC9,PLEK,ATG10,LRRK2,ARID1B,TANK,SASH1,SLC1A2,VAV3,RASGEF1B,HTR7,ARG2,SIK3,PARP8,NFE2L2,IRAK2,APP,PLA2G4A,RBM47,DIAPH2,WWOX,JARID2,SAA3,RFTN1,PLA2G7,CL…
GO:BP	positive regulation of metabolic process	GO:0009893	FALSE	1.1849849558517945e-20	19.9263	3745	433	142	26944	CAMK1D,MITF,ETV6,PID1,IL31RA,FBXL5,NOS2,TRAF3,ACSL1,PTPRJ,FNIP2,ZEB2,MAML2,RAPGEF2,RERE,SMYD3,RREB1,HEXB,CD86,CREB5,SLCO3A1,LRRK2,ARID1B,TANK,ZFP407,ELL2,ARG2,NFE2L2,APP,PLA2G4A,RBM47,WWOX,RFTN1,AMBRA1,FNIP1,BCAS3,HIF1A,CD38,RNF217,NEDD4L,JAK2,MALT1,NRG1,IL1A,DYRK1A,DAPK1,CBLB,LYN,MRTFA,BABAM2,RYBP,IFRD1,PDE4B,SRC,ERN1,MOB3B,AP3B1,FBXO11,VEGFA,INHBA,CLYBL,ARIH1,CD274,RHOQ,ESR1,MDFIC,FOXO3,HSPH1,S…
GO:BP	signaling	GO:0023052	FALSE	2.2678310977018417e-20	19.644389293724277	7472	433	218	26944	MITF,OSBPL8,ATRNL1,LDLRAD4,ABCA1,PID1,KPNA1,IL31RA,GNAQ,NOS2,PHLPP1,TRAF3,DENND1A,EXT1,MYO1E,AKT3,ACSL1,FBXL17,PTPRJ,FNIP2,EXOC4,ARHGAP24,ABI1,ZEB2,MAML2,PDE7B,RAPGEF2,TNS3,CACNA1D,ARHGAP10,GNG12,LRRC8C,RNF149,PLCL2,CD86,RAB8B,PLEK,ATG10,LRRK2,TANK,SASH1,VAV3,RASGEF1B,HTR7,SIK3,PARP8,NFE2L2,BTBD9,IRAK2,APP,PLA2G4A,RBM47,DIAPH2,WWOX,RFTN1,CLEC4D,PDPN,AMBRA1,LY6I,MCTP1,FNIP1,BCAS3,SLC7A11,LRRC8D,RA…
GO:BP	cell death	GO:0008219	FALSE	3.5955107922718405e-20	19.444239403332006	2125	433	101	26944	CAMK1D,MITF,CERS6,ETV6,KPNA1,GNAQ,NOS2,PHLPP1,TRAF3,FNIP2,ZEB2,RAPGEF2,ARHGAP10,LRRK2,ARG2,NFE2L2,TMEM164,IRAK2,APP,PLA2G4A,ST3GAL1,WWOX,PDPN,AMBRA1,FNIP1,SLC7A11,RFFL,HIF1A,CD38,JAK2,MALT1,CPEB4,NRG1,ELMO1,IL1A,DAPK1,CBLB,LYN,MRTFA,BABAM2,RYBP,SRC,GBE1,ERN1,SGPL1,FBXO11,VEGFA,INHBA,BCL6,CD274,ESR1,FOXO3,HSPH1,SH3KBP1,STK3,SOD2,SRGN,CTSS,DRAM1,MAP2K4,PTEN,BRAF,CHST11,GRINA,DOCK1,PPARD,PRDX5,BNIP3…
GO:BP	programmed cell death	GO:0012501	FALSE	3.5955107922718405e-20	19.444239403332006	2125	433	101	26944	CAMK1D,MITF,CERS6,ETV6,KPNA1,GNAQ,NOS2,PHLPP1,TRAF3,FNIP2,ZEB2,RAPGEF2,ARHGAP10,LRRK2,ARG2,NFE2L2,TMEM164,IRAK2,APP,PLA2G4A,ST3GAL1,WWOX,PDPN,AMBRA1,FNIP1,SLC7A11,RFFL,HIF1A,CD38,JAK2,MALT1,CPEB4,NRG1,ELMO1,IL1A,DAPK1,CBLB,LYN,MRTFA,BABAM2,RYBP,SRC,GBE1,ERN1,SGPL1,FBXO11,VEGFA,INHBA,BCL6,CD274,ESR1,FOXO3,HSPH1,SH3KBP1,STK3,SOD2,SRGN,CTSS,DRAM1,MAP2K4,PTEN,BRAF,CHST11,GRINA,DOCK1,PPARD,PRDX5,BNIP3…
GO:BP	locomotion	GO:0040011	FALSE	5.393849648084078e-20	19.268101163540802	1273	433	76	26944	CAMK1D,MITF,OSBPL8,LDLRAD4,AKT3,PTPRJ,LRCH1,ZEB2,RAPGEF2,RREB1,HDAC9,LRRK2,SASH1,VAV3,NFE2L2,APP,DIAPH2,SAA3,PLA2G7,PDPN,MCTP1,BCAS3,RABGEF1,RFFL,HIF1A,CLIC4,JAK2,NRG1,IL1A,LYN,CARMIL1,PDE4B,SRC,SRGAP2,VEGFA,BCL6,NRP2,MYO5A,CD274,FOXO3,SOD2,TNFAIP6,PTEN,BRAF,DOCK1,MGAT5,PPARD,MIF,MET,NTNG2,ADAM9,IQSEC1,GPNMB,ZFP609,ITGAV,MDM2,TRPM2,RGCC,JAG1,PIK3R1,CMKLR1,SDC4,TGFBR1,PTPN2,FPR3,NOD2,IRS2,PTGS2,TR…
GO:BP	cell surface receptor signaling pathway	GO:0007166	FALSE	7.740786885409855e-20	19.11121488910766	2766	433	117	26944	MITF,OSBPL8,LDLRAD4,ABCA1,PID1,KPNA1,IL31RA,GNAQ,TRAF3,EXT1,MYO1E,ACSL1,FBXL17,PTPRJ,ZEB2,MAML2,RAPGEF2,PLCL2,CD86,PLEK,LRRK2,SASH1,VAV3,IRAK2,APP,RBM47,DIAPH2,WWOX,RFTN1,CLEC4D,RABGEF1,RFFL,HIF1A,CD38,JAK2,MALT1,CPEB4,NRG1,IL1A,DAPK1,SDC1,CBLB,LYN,PDE4B,SRC,MBD5,SGPL1,VEGFA,INHBA,BCL6,NRP2,CD274,RHOQ,ESR1,MDFIC,FOXO3,NXN,STK3,TNFAIP6,CLEC4E,MAML3,TNKS,ACVR2A,PTEN,SIPA1L1,TEC,BRAF,JAK1,CHST11,FAM…
GO:BP	apoptotic process	GO:0006915	FALSE	1.2800636286030428e-19	18.89276844217683	2050	433	98	26944	CAMK1D,MITF,CERS6,ETV6,KPNA1,GNAQ,NOS2,PHLPP1,TRAF3,FNIP2,ZEB2,RAPGEF2,ARHGAP10,LRRK2,ARG2,NFE2L2,IRAK2,APP,PLA2G4A,ST3GAL1,WWOX,PDPN,AMBRA1,FNIP1,SLC7A11,RFFL,HIF1A,CD38,JAK2,MALT1,CPEB4,NRG1,ELMO1,IL1A,DAPK1,CBLB,LYN,MRTFA,BABAM2,RYBP,SRC,GBE1,ERN1,SGPL1,FBXO11,VEGFA,INHBA,BCL6,CD274,ESR1,FOXO3,HSPH1,SH3KBP1,STK3,SOD2,SRGN,CTSS,DRAM1,MAP2K4,PTEN,BRAF,CHST11,GRINA,DOCK1,PPARD,PRDX5,BNIP3,ITPR1,M…
GO:BP	positive regulation of multicellular organismal process	GO:0051240	FALSE	1.659747660720764e-19	18.779957934783333	1804	433	91	26944	SLC8A1,ABCA1,NOS2,TRAF3,AKT3,ACSL1,PTPRJ,ZEB2,MAN2A1,RREB1,CD86,RAB8B,PLEK,LRRK2,ARID1B,TANK,SASH1,VAV3,NFE2L2,APP,PLA2G4A,RBM47,RFTN1,CLEC4D,PDPN,AMBRA1,HIF1A,CD38,JAK2,MALT1,NRG1,IL1A,CBLB,LYN,B4GALT5,PDE4B,SRC,AP3B1,VEGFA,INHBA,BCL6,CD274,FOXO3,HSPH1,SH3KBP1,ZFP516,RFX3,ATP11C,CLEC4E,ACVR2A,PTEN,BRAF,JAK1,FAM20C,NCOA2,MIF,FABP5,ZFP609,C3,NFKBIZ,FRS2,H2-M2,RGCC,JAG1,PIK3R1,ATXN1,HK2,CMKLR1,NLRP…
GO:BP	cell differentiation	GO:0030154	FALSE	2.512232475534883e-19	18.59994017458038	4777	433	162	26944	LRMDA,CAMK1D,MITF,OSBPL8,LDLRAD4,CERS6,ETV6,IL31RA,GNAQ,EXT1,MYO1E,FBXL17,PTPRJ,EXOC4,ARHGAP24,ABI1,ZEB2,MAN2A1,RAPGEF2,RERE,LRRC8C,SMYD3,RREB1,HEXB,PLCL2,HDAC9,PLEK,LRRK2,ARID1B,HTR7,NFE2L2,APP,ST3GAL1,RBM47,DIAPH2,WWOX,JARID2,CLEC4D,ASAP1,PDPN,AMBRA1,FNIP1,SLC7A11,HIF1A,LARGE1,CD38,CLIC4,NEDD4L,TPD52,JAK2,MALT1,VPS13B,SLC23A2,NRG1,IL1A,ALCAM,SDC1,FAM172A,LYN,MRTFA,IFRD1,B4GALT5,MAP4K4,SRC,ADGB,…
GO:BP	cellular developmental process	GO:0048869	FALSE	2.568966981242292e-19	18.59024147765519	4778	433	162	26944	LRMDA,CAMK1D,MITF,OSBPL8,LDLRAD4,CERS6,ETV6,IL31RA,GNAQ,EXT1,MYO1E,FBXL17,PTPRJ,EXOC4,ARHGAP24,ABI1,ZEB2,MAN2A1,RAPGEF2,RERE,LRRC8C,SMYD3,RREB1,HEXB,PLCL2,HDAC9,PLEK,LRRK2,ARID1B,HTR7,NFE2L2,APP,ST3GAL1,RBM47,DIAPH2,WWOX,JARID2,CLEC4D,ASAP1,PDPN,AMBRA1,FNIP1,SLC7A11,HIF1A,LARGE1,CD38,CLIC4,NEDD4L,TPD52,JAK2,MALT1,VPS13B,SLC23A2,NRG1,IL1A,ALCAM,SDC1,FAM172A,LYN,MRTFA,IFRD1,B4GALT5,MAP4K4,SRC,ADGB,…
GO:BP	localization	GO:0051179	FALSE	3.383322838053689e-19	18.470656559677064	5364	433	174	26944	SLC8A1,CAMK1D,OSBPL8,GPHN,ABCA1,PID1,KPNA1,GNAQ,NOS2,DENND1A,EXT1,MYO1E,AKT3,ACSL1,PTPRJ,EXOC4,SLC7A2,TBC1D5,RAPGEF2,CACNA1D,LRRC8C,SMYD3,HEXB,RAB8B,SLCO3A1,PLEK,SESTD1,LRRK2,SLC1A2,VAV3,HTR7,ARG2,SIK3,NFE2L2,BTBD9,MAN1A,APP,PLA2G4A,OSBPL3,DIAPH2,JARID2,RFTN1,ASAP1,VTI1A,MCTP1,SLC7A11,LRRC8D,RABGEF1,APBA1,UVRAG,RFFL,HIF1A,MPP7,LARGE1,CD38,CLIC4,NEDD4L,JAK2,ATP8B4,MALT1,VPS13B,EPB41L2,SLC23A2,NRG1…
GO:BP	transport	GO:0006810	FALSE	5.974825010616505e-19	18.22367480971648	4397	433	153	26944	SLC8A1,CAMK1D,OSBPL8,ABCA1,PID1,KPNA1,GNAQ,NOS2,DENND1A,EXT1,MYO1E,AKT3,ACSL1,PTPRJ,EXOC4,SLC7A2,TBC1D5,CACNA1D,LRRC8C,RAB8B,SLCO3A1,PLEK,SESTD1,LRRK2,SLC1A2,VAV3,HTR7,ARG2,NFE2L2,BTBD9,APP,PLA2G4A,OSBPL3,RFTN1,VTI1A,MCTP1,SLC7A11,LRRC8D,RABGEF1,APBA1,UVRAG,RFFL,HIF1A,LARGE1,CD38,CLIC4,NEDD4L,JAK2,ATP8B4,MALT1,VPS13B,SLC23A2,NRG1,ELMO1,IL1A,DAPK1,SDC1,LYN,CARMIL1,SLC2A1,MAP4K4,PDE4B,SRC,RSRC1,AP3…
GO:BP	regulation of cell migration	GO:0030334	FALSE	6.179097292126629e-19	18.20907496660755	984	433	65	26944	CAMK1D,MITF,OSBPL8,LDLRAD4,AKT3,PTPRJ,LRCH1,ZEB2,RAPGEF2,RREB1,HDAC9,SASH1,NFE2L2,APP,PLA2G7,PDPN,MCTP1,BCAS3,RABGEF1,RFFL,HIF1A,CLIC4,JAK2,NRG1,IL1A,LYN,CARMIL1,SRC,SRGAP2,VEGFA,MYO5A,CD274,FOXO3,SOD2,TNFAIP6,PTEN,BRAF,DOCK1,MGAT5,PPARD,MIF,MET,NTNG2,ADAM9,IQSEC1,GPNMB,ZFP609,ITGAV,MDM2,RGCC,JAG1,PIK3R1,CMKLR1,SDC4,TGFBR1,FPR3,NOD2,IRS2,PTGS2,TREM2,HMOX1,BST1,CD40,APOE,CD63
GO:BP	regulation of locomotion	GO:0040012	FALSE	1.3360659235855546e-18	17.87417211256175	1089	433	68	26944	CAMK1D,MITF,OSBPL8,LDLRAD4,AKT3,PTPRJ,LRCH1,ZEB2,RAPGEF2,RREB1,HDAC9,LRRK2,SASH1,NFE2L2,APP,PLA2G7,PDPN,MCTP1,BCAS3,RABGEF1,RFFL,HIF1A,CLIC4,JAK2,NRG1,IL1A,LYN,CARMIL1,SRC,SRGAP2,VEGFA,BCL6,MYO5A,CD274,FOXO3,SOD2,TNFAIP6,PTEN,BRAF,DOCK1,MGAT5,PPARD,MIF,MET,NTNG2,ADAM9,IQSEC1,GPNMB,ZFP609,ITGAV,MDM2,RGCC,JAG1,PIK3R1,CMKLR1,SDC4,TGFBR1,PTPN2,FPR3,NOD2,IRS2,PTGS2,TREM2,HMOX1,BST1,CD40,APOE,CD63
GO:BP	establishment of localization	GO:0051234	FALSE	2.6744046341880964e-18	17.572772883872645	4696	433	158	26944	SLC8A1,CAMK1D,OSBPL8,GPHN,ABCA1,PID1,KPNA1,GNAQ,NOS2,DENND1A,EXT1,MYO1E,AKT3,ACSL1,PTPRJ,EXOC4,SLC7A2,TBC1D5,CACNA1D,LRRC8C,SMYD3,RAB8B,SLCO3A1,PLEK,SESTD1,LRRK2,SLC1A2,VAV3,HTR7,ARG2,NFE2L2,BTBD9,MAN1A,APP,PLA2G4A,OSBPL3,RFTN1,VTI1A,MCTP1,SLC7A11,LRRC8D,RABGEF1,APBA1,UVRAG,RFFL,HIF1A,LARGE1,CD38,CLIC4,NEDD4L,JAK2,ATP8B4,MALT1,VPS13B,SLC23A2,NRG1,ELMO1,IL1A,DAPK1,SDC1,LYN,CARMIL1,SLC2A1,MAP4K4,PD…
GO:BP	positive regulation of immune system process	GO:0002684	FALSE	2.974053124525371e-18	17.526651278086373	1105	433	68	26944	CAMK1D,TRAF3,PTPRJ,PLCL2,CD86,LRRK2,ARID1B,VAV3,IRAK2,APP,PLA2G4A,RBM47,RFTN1,PLA2G7,CLEC4D,AMBRA1,RABGEF1,CD38,JAK2,MALT1,IL1A,CBLB,LYN,PDE4B,SRC,AP3B1,VEGFA,BCL6,CD274,ESR1,FOXO3,HSPH1,SH3KBP1,ATP11C,CLEC4E,PTEN,TEC,BRAF,MIF,OASL1,ZFP609,C3,NFKBIZ,SH2B2,TNIP1,H2-M2,RGCC,PIK3R1,CMKLR1,NLRP3,PTPN2,FPR3,CFB,NOD2,RIPK2,ITGAM,DCSTAMP,TRAF6,IRS2,TREM2,SLC11A1,NFKB1,CD40,CD14,ACOD1,ZC3HAV1,RSAD2,CLEC4N
GO:BP	regulation of cell motility	GO:2000145	FALSE	3.1758429145141746e-18	17.498140987053144	1045	433	66	26944	CAMK1D,MITF,OSBPL8,LDLRAD4,AKT3,PTPRJ,LRCH1,ZEB2,RAPGEF2,RREB1,HDAC9,SASH1,NFE2L2,APP,PLA2G7,PDPN,MCTP1,BCAS3,RABGEF1,RFFL,HIF1A,CLIC4,JAK2,NRG1,IL1A,LYN,CARMIL1,SRC,SRGAP2,VEGFA,BCL6,MYO5A,CD274,FOXO3,SOD2,TNFAIP6,PTEN,BRAF,DOCK1,MGAT5,PPARD,MIF,MET,NTNG2,ADAM9,IQSEC1,GPNMB,ZFP609,ITGAV,MDM2,RGCC,JAG1,PIK3R1,CMKLR1,SDC4,TGFBR1,FPR3,NOD2,IRS2,PTGS2,TREM2,HMOX1,BST1,CD40,APOE,CD63
GO:BP	cellular response to oxygen-containing compound	GO:1901701	FALSE	3.265303926941422e-18	17.486076389381086	1497	433	80	26944	OSBPL8,ABCA1,PID1,GNAQ,NOS2,AKT3,PTPRJ,RAPGEF2,CACNA1D,SMYD3,CD86,HDAC9,LRRK2,ARID1B,SASH1,SLC1A2,HTR7,NFE2L2,IRAK2,APP,LY6I,HIF1A,LARGE1,JAK2,MALT1,CPEB4,SLC23A2,IL1A,DAPK1,LYN,MAP4K4,PDE4B,SRC,MBD5,ERN1,INHBA,MYO5A,CD274,RHOQ,ESR1,FOXO3,SOD2,CPEB2,MAP2K4,HDAC8,PTEN,NCOA2,PPARD,PRDX5,BNIP3,ITPR1,MIF,LY6C2,MET,ADAM9,GRAMD1B,PSAP,GCLC,MDM2,NFKBIZ,SH2B2,TRPM2,TNIP1,PIK3R1,NLRP3,PTPN2,FPR3,MGST1,CYB…
GO:BP	signal transduction	GO:0007165	FALSE	3.2966813173998773e-18	17.48192303307644	6895	433	202	26944	MITF,OSBPL8,ATRNL1,LDLRAD4,ABCA1,PID1,KPNA1,IL31RA,GNAQ,NOS2,PHLPP1,TRAF3,DENND1A,EXT1,MYO1E,AKT3,ACSL1,FBXL17,PTPRJ,FNIP2,EXOC4,ARHGAP24,ABI1,ZEB2,MAML2,PDE7B,RAPGEF2,TNS3,CACNA1D,ARHGAP10,GNG12,LRRC8C,RNF149,PLCL2,CD86,PLEK,ATG10,LRRK2,TANK,SASH1,VAV3,RASGEF1B,HTR7,SIK3,PARP8,NFE2L2,IRAK2,APP,RBM47,DIAPH2,WWOX,RFTN1,CLEC4D,PDPN,AMBRA1,LY6I,FNIP1,LRRC8D,RABGEF1,RFFL,HIF1A,LARGE1,CD38,CYTH1,JAK2,…
GO:BP	regulation of programmed cell death	GO:0043067	FALSE	3.524242371769267e-18	17.45293423161574	1707	433	86	26944	CAMK1D,MITF,CERS6,KPNA1,GNAQ,NOS2,PHLPP1,TRAF3,ZEB2,RAPGEF2,ARHGAP10,LRRK2,ARG2,NFE2L2,TMEM164,IRAK2,APP,PLA2G4A,ST3GAL1,WWOX,PDPN,AMBRA1,FNIP1,SLC7A11,RFFL,HIF1A,CD38,JAK2,MALT1,CPEB4,NRG1,DAPK1,CBLB,LYN,MRTFA,BABAM2,RYBP,SRC,GBE1,FBXO11,VEGFA,INHBA,BCL6,CD274,ESR1,FOXO3,HSPH1,STK3,SOD2,CTSS,MAP2K4,PTEN,BRAF,CHST11,GRINA,PPARD,PRDX5,BNIP3,ITPR1,MIF,MET,ITGAV,ARF4,GCLC,MDM2,FRS2,RGCC,PIK3R1,TGFBR…
GO:BP	regulation of transport	GO:0051049	FALSE	4.503219450127654e-18	17.346476888556225	1749	433	87	26944	CAMK1D,OSBPL8,ABCA1,PID1,GNAQ,NOS2,AKT3,ACSL1,PTPRJ,EXOC4,TBC1D5,CACNA1D,RAB8B,SESTD1,LRRK2,SLC1A2,HTR7,ARG2,NFE2L2,BTBD9,APP,PLA2G4A,MCTP1,SLC7A11,RABGEF1,HIF1A,CD38,NEDD4L,JAK2,NRG1,IL1A,DAPK1,SDC1,LYN,MAP4K4,PDE4B,SRC,FBXO11,VEGFA,INHBA,MYO5A,RHOQ,ESR1,MDFIC,CTSS,RFX3,ACVR2A,ENTPD1,PTEN,BRAF,EPB41,PPARD,ACSL4,ITPR1,EXOC2,MIF,RIC1,FABP5,ADAM9,IQSEC1,ITGAV,C3,GCLC,MDM2,SH2B2,TRPM2,RGCC,PIK3R1,HK…
GO:BP	response to external stimulus	GO:0009605	FALSE	6.27389285450787e-18	17.20246290245264	3042	433	120	26944	SLC8A1,CAMK1D,ABCA1,IL31RA,NOS2,PHLPP1,TRAF3,EXT1,ACSL1,FBXL17,PTPRJ,SLC7A2,ZEB2,TBC1D5,AOAH,CD86,LRRK2,SASH1,SLC1A2,VAV3,HTR7,ARG2,NFE2L2,IRAK2,APP,RBM47,SAA3,RFTN1,PLA2G7,CLEC4D,AMBRA1,FNIP1,BCAS3,RABGEF1,HIF1A,LARGE1,JAK2,MALT1,CPEB4,NRG1,IL1A,DAPK1,LYN,SLC2A1,PDE4B,SRC,AP3B1,VEGFA,INHBA,BCL6,NRP2,CD274,ESR1,FOXO3,SOD2,CTSS,TNFAIP6,CLEC4E,TNKS,ACVR2A,MAP2K4,PTEN,BRAF,JAK1,PPARD,BNIP3,MIF,APOBE…
GO:BP	homeostatic process	GO:0042592	FALSE	7.564778008879876e-18	17.121203811980923	1835	433	89	26944	SLC8A1,ABCA1,FBXL5,EXT1,AKT3,ACSL1,PTPRJ,ZEB2,TNS3,CACNA1D,HEXB,PLCL2,HDAC9,LRRK2,NFE2L2,BTBD9,APP,PLA2G4A,AMBRA1,SLC7A11,LRRC8D,HIF1A,LARGE1,CD38,CLIC4,JAK2,VPS13B,IL1A,LYN,SLC2A1,MAP4K4,PDE4B,SRC,MBD5,ERN1,AP3B1,FTH1,VEGFA,INHBA,BCL6,MYO5A,FOXO3,SOD2,ZFP516,CTSS,ACVR2A,GRINA,PPARD,NFAT5,PRDX5,BNIP3,ITPR1,MIF,MED13,FABP5,P2RY14,ITGAV,GRAMD1B,GCLC,NFKBIZ,SH2B2,TRPM2,TLCD2,GLS,PIK3R1,HK2,CMKLR1,PT…
GO:BP	regulation of biological quality	GO:0065008	FALSE	7.803315831564006e-18	17.107720815085024	3134	433	122	26944	SLC8A1,FMNL2,GPHN,ABCA1,PID1,GNAQ,NOS2,EXT1,AKT3,PTPRJ,ZEB2,RAPGEF2,CACNA1D,RNF149,HEXB,RAB8B,PLEK,LRRK2,VAV3,HTR7,NFE2L2,APP,PLA2G4A,RBM47,ASAP1,PDPN,SLC7A11,HIF1A,LARGE1,CD38,CLIC4,NEDD4L,JAK2,ATP8B4,EPB41L2,CPQ,NRG1,LYN,CARMIL1,IFRD1,B4GALT5,MAP4K4,SRC,F13A1,SGPL1,AP3B1,VEGFA,INHBA,NRP2,PDLIM5,MYO5A,RHOQ,ESR1,SH3KBP1,STK3,SOD2,SRGN,RFX3,FMN1,NOS1AP,ATP11C,ACVR2A,HDAC8,ENTPD1,PTEN,SIPA1L1,TEC,B…
GO:BP	regulation of apoptotic process	GO:0042981	FALSE	8.022274485979545e-18	17.095702482505597	1658	433	84	26944	CAMK1D,MITF,CERS6,KPNA1,GNAQ,NOS2,PHLPP1,TRAF3,ZEB2,RAPGEF2,ARHGAP10,LRRK2,ARG2,NFE2L2,IRAK2,APP,PLA2G4A,ST3GAL1,WWOX,PDPN,AMBRA1,FNIP1,SLC7A11,RFFL,HIF1A,CD38,JAK2,MALT1,CPEB4,NRG1,DAPK1,CBLB,LYN,MRTFA,BABAM2,RYBP,SRC,GBE1,FBXO11,VEGFA,INHBA,BCL6,CD274,ESR1,FOXO3,HSPH1,STK3,SOD2,CTSS,MAP2K4,PTEN,BRAF,CHST11,GRINA,PPARD,PRDX5,BNIP3,ITPR1,MIF,ITGAV,ARF4,GCLC,MDM2,FRS2,RGCC,PIK3R1,TGFBR1,PTPN2,BCL2…
GO:BP	response to organic substance	GO:0010033	FALSE	2.4651836312921866e-17	16.608150724627507	3435	433	128	26944	OSBPL8,ABCA1,PID1,IL31RA,GNAQ,NOS2,TRAF3,EXT1,AKT3,ACSL1,PTPRJ,LRCH1,RAPGEF2,CACNA1D,SMYD3,CD86,HDAC9,LRRK2,ARID1B,TANK,SASH1,SLC1A2,HTR7,PARP8,NFE2L2,IRAK2,APP,PLA2G4A,RBM47,JARID2,SAA3,RFTN1,LY6I,BCAS3,SLC7A11,RABGEF1,RFFL,HIF1A,LARGE1,CD38,JAK2,MALT1,CPEB4,SLC23A2,IL1A,DAPK1,SDC1,LYN,SLC2A1,MAP4K4,PDE4B,SRC,MBD5,ERN1,INHBA,NRP2,MYO5A,CD274,RHOQ,ESR1,FOXO3,HSPH1,SOD2,MAP4K3,CPEB2,CTSS,MAP2K4,HD…
GO:BP	regulation of cellular component organization	GO:0051128	FALSE	1.7652131410716165e-16	15.753202848121715	2546	433	105	26944	CAMK1D,ABCA1,PTPRJ,FNIP2,ARHGAP24,ZEB2,TBC1D5,RAPGEF2,RREB1,RAB8B,PLEK,LRRK2,ARID1B,HTR7,NFE2L2,BTBD9,APP,PLA2G4A,DIAPH2,ASAP1,PDPN,AMBRA1,MCTP1,FNIP1,BCAS3,SLC7A11,RABGEF1,HIF1A,MPP7,CD38,NEDD4L,SLC23A2,NRG1,IL1A,DYRK1A,SDC1,LYN,CARMIL1,IFRD1,MAP4K4,SRC,VEGFA,INHBA,BCL6,NRP2,PDLIM5,IQGAP2,RHOQ,ESR1,NSMCE2,HSPH1,SRGN,FMN1,TNKS,HDAC8,PTEN,SIPA1L1,BRAF,SPECC1L,PPARD,BNIP3,ACSL4,DDHD1,ITPR1,APOBEC1,…
GO:BP	regulation of cell activation	GO:0050865	FALSE	2.067678302295874e-16	15.684517029604024	633	433	49	26944	GNAQ,PTPRJ,SLC7A2,CD86,PLEK,LRRK2,ARID1B,VAV3,ARG2,PLA2G4A,CLEC4D,PDPN,AMBRA1,RABGEF1,CD38,JAK2,MALT1,IL1A,CBLB,LYN,AP3B1,BCL6,CD274,FOXO3,HSPH1,SH3KBP1,ATP11C,PTEN,TEC,BRAF,MIF,GPNMB,ZFP609,GCLC,NFKBIZ,PAG1,H2-M2,SDC4,NLRP3,PTPN2,NOD2,RIPK2,CST7,TRAF6,IRS2,TREM2,CD40,APOE,MERTK
GO:BP	negative regulation of cellular process	GO:0048523	FALSE	2.677500647158204e-16	15.572270415526097	5599	433	172	26944	CAMK1D,TRPS1,MITF,OSBPL8,CDK8,LDLRAD4,ETV6,PID1,GNAQ,NOS2,PHLPP1,AKT3,PTPRJ,FNIP2,ARHGAP24,LRCH1,ZEB2,RAPGEF2,RERE,TNS3,ARHGAP10,RNF149,SND1,RREB1,PLCL2,HDAC9,PLEK,SESTD1,LRRK2,TANK,HTR7,ARG2,NFE2L2,APP,ST3GAL1,RBM47,DIAPH2,WWOX,JARID2,PDPN,AMBRA1,MCTP1,FNIP1,SLC7A11,RABGEF1,RFFL,HIF1A,CD38,CLIC4,NEDD4L,JAK2,CPEB4,ZCCHC7,NRG1,IL1A,DYRK1A,DAPK1,CBLB,FAM172A,CDYL2,LYN,MRTFA,BABAM2,RYBP,CARMIL1,IFRD…
GO:BP	regulation of metabolic process	GO:0019222	FALSE	2.8086710104038605e-16	15.551499128272187	6882	433	197	26944	CAMK1D,TRPS1,MITF,CDK8,ETV6,PID1,IL31RA,FBXL5,NOS2,PHLPP1,TRAF3,AKT3,ACSL1,PTPRJ,AFF1,FNIP2,ZEB2,MAML2,RAPGEF2,RERE,SMYD3,SND1,RREB1,HEXB,PLCL2,CD86,HDAC9,CREB5,SLCO3A1,PLEK,LRRK2,ARID1B,TANK,ZFP407,SASH1,ELL2,ARG2,NFE2L2,TACO1,APP,PLA2G4A,RBM47,WWOX,JARID2,RFTN1,AMBRA1,FNIP1,BCAS3,SLC7A11,RABGEF1,APBA1,UVRAG,RFFL,HIF1A,CD38,RNF217,NEDD4L,JAK2,MALT1,CPEB4,ZCCHC7,NRG1,IL1A,DYRK1A,DAPK1,CBLB,FAM172…
GO:BP	immune response-regulating signaling pathway	GO:0002764	FALSE	2.886334152908249e-16	15.5397	462	433	42	26944	TRAF3,PTPRJ,PLCL2,CD86,VAV3,IRAK2,APP,RFTN1,CLEC4D,RABGEF1,CD38,MALT1,CBLB,LYN,PDE4B,SRC,AP3B1,ESR1,CLEC4E,PTEN,TEC,BRAF,OASL1,C3,NFKBIZ,SH2B2,TNIP1,PIK3R1,CMKLR1,NLRP3,PTPN2,FPR3,NOD2,RIPK2,TRAF6,TREM2,NFKB1,CD40,CD14,ZC3HAV1,RSAD2,CLEC4N
GO:BP	negative regulation of biological process	GO:0048519	FALSE	3.5896920053146115e-16	15.444942812182255	5966	433	179	26944	CAMK1D,TRPS1,MITF,OSBPL8,CDK8,LDLRAD4,ETV6,PID1,GNAQ,NOS2,PHLPP1,AKT3,PTPRJ,FNIP2,ARHGAP24,LRCH1,ZEB2,RAPGEF2,RERE,TNS3,AOAH,ARHGAP10,RNF149,SND1,RREB1,PLCL2,CD86,HDAC9,PLEK,SESTD1,LRRK2,TANK,HTR7,ARG2,NFE2L2,APP,ST3GAL1,RBM47,DIAPH2,WWOX,JARID2,ASAP1,PDPN,AMBRA1,MCTP1,FNIP1,SLC7A11,RABGEF1,RFFL,HIF1A,CD38,CLIC4,NEDD4L,JAK2,CPEB4,ZCCHC7,NRG1,IL1A,DYRK1A,DAPK1,CBLB,FAM172A,CDYL2,LYN,MRTFA,BABAM2,R…
GO:BP	protein metabolic process	GO:0019538	FALSE	4.2324946346114115e-16	15.373403583758929	4698	433	153	26944	CAMK1D,CDK8,GPHN,ABCA1,PID1,IL31RA,FBXL5,NOS2,PHLPP1,TRAF3,EXT1,AKT3,FBXL17,PTPRJ,FNIP2,MAN2A1,RAPGEF2,RNF149,SMYD3,FARS2,HEXB,CD86,SLCO3A1,ATG10,LRRK2,TANK,SASH1,SIK3,PARP8,NFE2L2,IRAK2,MAN1A,TACO1,APP,ST3GAL1,AMBRA1,FNIP1,RABGEF1,RFFL,HIF1A,LARGE1,PPM1H,RNF217,NEDD4L,JAK2,MALT1,CPEB4,CPQ,NRG1,DYRK1A,DAPK1,CBLB,LYN,BABAM2,RYBP,CDKAL1,B4GALT5,MAP4K4,SRC,ADGB,XYLT1,F13A1,ERN1,MOB3B,AP3B1,FBXO11,VE…
GO:BP	positive regulation of macromolecule metabolic process	GO:0010604	FALSE	5.049564281004623e-16	15.296746094855461	3427	433	125	26944	MITF,ETV6,PID1,IL31RA,FBXL5,NOS2,TRAF3,PTPRJ,FNIP2,ZEB2,MAML2,RAPGEF2,RERE,SMYD3,RREB1,HEXB,CD86,CREB5,SLCO3A1,LRRK2,ARID1B,TANK,ZFP407,ELL2,NFE2L2,APP,RBM47,WWOX,RFTN1,AMBRA1,FNIP1,BCAS3,HIF1A,CD38,RNF217,NEDD4L,JAK2,MALT1,NRG1,IL1A,DYRK1A,CBLB,LYN,MRTFA,BABAM2,RYBP,IFRD1,PDE4B,SRC,ERN1,MOB3B,AP3B1,FBXO11,VEGFA,INHBA,ARIH1,CD274,RHOQ,ESR1,MDFIC,FOXO3,HSPH1,ZFP516,RFX3,NUP98,CLEC4E,MAML3,TNKS,ZFH…
GO:BP	immune response-activating signaling pathway	GO:0002757	FALSE	5.804875769695077e-16	15.236207070174025	447	433	41	26944	TRAF3,PTPRJ,PLCL2,CD86,VAV3,IRAK2,APP,RFTN1,RABGEF1,CD38,MALT1,CBLB,LYN,PDE4B,SRC,AP3B1,ESR1,CLEC4E,PTEN,TEC,BRAF,OASL1,C3,NFKBIZ,SH2B2,TNIP1,PIK3R1,CMKLR1,NLRP3,PTPN2,FPR3,NOD2,RIPK2,TRAF6,TREM2,NFKB1,CD40,CD14,ZC3HAV1,RSAD2,CLEC4N
GO:BP	positive regulation of immune response	GO:0050778	FALSE	1.2463463249263929e-15	14.904361262568035	744	433	52	26944	TRAF3,PTPRJ,PLCL2,CD86,VAV3,IRAK2,APP,PLA2G4A,RBM47,RFTN1,RABGEF1,CD38,JAK2,MALT1,CBLB,LYN,PDE4B,SRC,AP3B1,CD274,ESR1,CLEC4E,PTEN,TEC,BRAF,MIF,OASL1,C3,NFKBIZ,SH2B2,TNIP1,H2-M2,RGCC,PIK3R1,CMKLR1,NLRP3,PTPN2,FPR3,CFB,NOD2,RIPK2,ITGAM,TRAF6,TREM2,SLC11A1,NFKB1,CD40,CD14,ACOD1,ZC3HAV1,RSAD2,CLEC4N
GO:BP	cellular response to organic substance	GO:0071310	FALSE	1.5148780775324638e-15	14.819622319231392	2420	433	100	26944	OSBPL8,ABCA1,PID1,IL31RA,GNAQ,NOS2,TRAF3,AKT3,ACSL1,PTPRJ,LRCH1,RAPGEF2,CACNA1D,SMYD3,CD86,HDAC9,LRRK2,ARID1B,TANK,SASH1,SLC1A2,HTR7,PARP8,NFE2L2,IRAK2,APP,RBM47,JARID2,SAA3,BCAS3,RABGEF1,RFFL,HIF1A,JAK2,MALT1,CPEB4,SLC23A2,IL1A,DAPK1,LYN,MAP4K4,PDE4B,SRC,MBD5,ERN1,INHBA,NRP2,MYO5A,CD274,RHOQ,ESR1,FOXO3,SOD2,CPEB2,CTSS,MAP2K4,HDAC8,PTEN,JAK1,NCOA2,PPARD,NFAT5,ITPR1,MIF,OASL1,ADAM9,GRAMD1B,PSAP,GC…
GO:BP	positive regulation of cellular metabolic process	GO:0031325	FALSE	1.7054923175881335e-15	14.768150232537202	3434	433	124	26944	MITF,ETV6,PID1,IL31RA,NOS2,TRAF3,PTPRJ,FNIP2,ZEB2,MAML2,RAPGEF2,RERE,SMYD3,RREB1,HEXB,CD86,CREB5,SLCO3A1,LRRK2,ARID1B,TANK,ZFP407,ELL2,ARG2,NFE2L2,APP,PLA2G4A,RBM47,WWOX,RFTN1,AMBRA1,FNIP1,BCAS3,HIF1A,CD38,JAK2,MALT1,NRG1,IL1A,DYRK1A,DAPK1,LYN,MRTFA,BABAM2,RYBP,IFRD1,PDE4B,SRC,ERN1,MOB3B,AP3B1,VEGFA,INHBA,CLYBL,CD274,RHOQ,ESR1,MDFIC,FOXO3,HSPH1,SOD2,ZFP516,RFX3,NUP98,CLEC4E,MAML3,TNKS,ZFHX3,ACVR2…
GO:BP	defense response	GO:0006952	FALSE	2.033580628093759e-15	14.691738603863266	1812	433	84	26944	CAMK1D,CERS6,IL31RA,NOS2,TRAF3,EXT1,SLC7A2,ZEB2,AOAH,CD86,LRRK2,ARG2,NFE2L2,IRAK2,APP,RBM47,SAA3,RFTN1,PLA2G7,CLEC4D,RABGEF1,HIF1A,LARGE1,JAK2,MALT1,IL1A,DAPK1,LYN,SRC,AP3B1,BCL6,MYO5A,ESR1,CTSS,TNFAIP6,CLEC4E,PTEN,JAK1,ORM1,PPARD,BNIP3,MIF,APOBEC1,OASL1,ITGAV,C3,NFKBIZ,TNIP1,H2-M2,PIK3R1,LYST,CMKLR1,NLRP3,PTPN2,FPR3,RPS6KA5,RNF19B,CFB,CYBB,KYNU,NOD2,HTRA1,RIPK2,OLR1,GCH1,CST7,TRAF6,PTGS2,TREM2,H…
GO:BP	regulation of localization	GO:0032879	FALSE	2.5379567764936763e-15	14.595515778573123	2161	433	93	26944	CAMK1D,OSBPL8,ABCA1,PID1,GNAQ,NOS2,AKT3,ACSL1,PTPRJ,EXOC4,TBC1D5,CACNA1D,RAB8B,SESTD1,LRRK2,SLC1A2,HTR7,ARG2,SIK3,NFE2L2,BTBD9,APP,PLA2G4A,MCTP1,SLC7A11,RABGEF1,HIF1A,CD38,NEDD4L,JAK2,EPB41L2,NRG1,IL1A,DAPK1,SDC1,LYN,MAP4K4,PDE4B,SRC,FBXO11,VEGFA,INHBA,MYO5A,RHOQ,ESR1,MDFIC,CTSS,RFX3,TNFAIP6,ACVR2A,ENTPD1,PTEN,BRAF,JAK1,EPB41,PPARD,ACSL4,ITPR1,EXOC2,MIF,RIC1,FABP5,ASTN2,ADAM9,IQSEC1,ITGAV,C3,GCLC…
GO:BP	protein modification process	GO:0036211	FALSE	2.83805568858781e-15	14.546979087028966	2728	433	107	26944	CAMK1D,CDK8,PID1,IL31RA,FBXL5,NOS2,PHLPP1,TRAF3,EXT1,AKT3,FBXL17,PTPRJ,FNIP2,MAN2A1,RAPGEF2,RNF149,SMYD3,CD86,SLCO3A1,ATG10,LRRK2,TANK,SASH1,SIK3,PARP8,NFE2L2,IRAK2,MAN1A,APP,ST3GAL1,AMBRA1,FNIP1,RABGEF1,RFFL,HIF1A,LARGE1,PPM1H,RNF217,NEDD4L,JAK2,NRG1,DYRK1A,DAPK1,CBLB,LYN,BABAM2,B4GALT5,MAP4K4,SRC,F13A1,ERN1,MOB3B,AP3B1,FBXO11,VEGFA,INHBA,ARIH1,ST3GAL3,NSMCE2,NXN,STK3,MAP4K3,TNKS,ACVR2A,MAP2K4,H…
GO:BP	leukocyte activation	GO:0045321	FALSE	3.1301197750338983e-15	14.504439043718394	1031	433	61	26944	PTPRJ,SLC7A2,PLCL2,CD86,LRRK2,ARID1B,VAV3,ARG2,APP,PLA2G4A,ST3GAL1,CLEC4D,AMBRA1,FNIP1,RABGEF1,CD38,TPD52,JAK2,MALT1,IL1A,CBLB,LYN,AP3B1,BCL6,CD274,FOXO3,HSPH1,SH3KBP1,ATP11C,CLEC4E,PTEN,BRAF,MIF,ADAM9,GPNMB,ZFP609,ITGAV,PSAP,NFKBIZ,PAG1,H2-M2,PIK3R1,SDC4,NLRP3,PTPN2,CFB,NOD2,RIPK2,ITGAM,DCSTAMP,CST7,TRAF6,IRS2,TREM2,HMOX1,UBD,SLC11A1,CD40,MAFB,MERTK,RSAD2
GO:BP	positive regulation of nitrogen compound metabolic process	GO:0051173	FALSE	3.3683548612439917e-15	14.472582161186125	2944	433	112	26944	MITF,ETV6,PID1,IL31RA,FBXL5,PTPRJ,FNIP2,ZEB2,MAML2,RAPGEF2,RERE,SMYD3,RREB1,HEXB,CD86,CREB5,SLCO3A1,LRRK2,ARID1B,TANK,ZFP407,ELL2,NFE2L2,APP,WWOX,AMBRA1,FNIP1,BCAS3,HIF1A,CD38,RNF217,NEDD4L,JAK2,NRG1,IL1A,DYRK1A,CBLB,LYN,MRTFA,BABAM2,RYBP,IFRD1,SRC,ERN1,MOB3B,AP3B1,FBXO11,VEGFA,INHBA,CLYBL,ARIH1,CD274,RHOQ,ESR1,MDFIC,FOXO3,SOD2,ZFP516,RFX3,NUP98,MAML3,TNKS,ZFHX3,ACVR2A,MAP2K4,PTEN,BRAF,NCOA2,TCF1…
GO:BP	regulation of immune response	GO:0050776	FALSE	3.949750509567501e-15	14.403430336206489	912	433	57	26944	TRAF3,PTPRJ,PLCL2,CD86,VAV3,ARG2,NFE2L2,IRAK2,APP,PLA2G4A,RBM47,RFTN1,CLEC4D,RABGEF1,CD38,JAK2,MALT1,CBLB,LYN,PDE4B,SRC,AP3B1,BCL6,CD274,ESR1,CLEC4E,PTEN,TEC,BRAF,MIF,OASL1,C3,NFKBIZ,SH2B2,TNIP1,H2-M2,RGCC,PIK3R1,CMKLR1,NLRP3,PTPN2,FPR3,CFB,NOD2,RIPK2,ITGAM,TRAF6,TREM2,SLC11A1,NFKB1,CD40,CD14,APOE,ACOD1,ZC3HAV1,RSAD2,CLEC4N
GO:BP	positive regulation of signal transduction	GO:0009967	FALSE	4.0918627007854054e-15	14.388078947123036	1613	433	78	26944	OSBPL8,PHLPP1,AKT3,PTPRJ,FNIP2,EXOC4,ZEB2,RAPGEF2,TNS3,CD86,LRRK2,SASH1,VAV3,SIK3,APP,RBM47,WWOX,CLEC4D,AMBRA1,FNIP1,HIF1A,JAK2,NRG1,IL1A,LYN,SRC,MBD5,ERN1,VEGFA,INHBA,ESR1,STK3,CTSS,TNKS,ACVR2A,MAP2K4,PTEN,BRAF,SPECC1L,NCOA2,MGAT5,PPARD,NFAT5,PDE8A,MIF,OASL1,FABP5,GPNMB,ITGAV,C3,PSAP,FRS2,JAG1,PIK3R1,NLRP3,TGFBR1,F10,PTPN2,BCL2L11,WAC,FPR3,DISC1,KSR2,ACPP,NOD2,RIPK2,TRAF6,IRS2,TREM2,UBD,NFKB1,CD…
GO:BP	organic substance transport	GO:0071702	FALSE	4.623771985608856e-15	14.33500359064148	2419	433	99	26944	OSBPL8,ABCA1,PID1,KPNA1,GNAQ,NOS2,DENND1A,ACSL1,EXOC4,SLC7A2,TBC1D5,CACNA1D,LRRC8C,RAB8B,SLCO3A1,PLEK,LRRK2,SLC1A2,HTR7,ARG2,NFE2L2,APP,PLA2G4A,OSBPL3,RFTN1,VTI1A,SLC7A11,LRRC8D,RABGEF1,APBA1,RFFL,HIF1A,LARGE1,CD38,JAK2,ATP8B4,VPS13B,SLC23A2,NRG1,IL1A,LYN,SLC2A1,MAP4K4,SRC,AP3B1,SLC38A6,INHBA,MYO5A,RHOQ,ESR1,MDFIC,SH3KBP1,STK3,KPNA4,RFX3,ATP11C,NUP98,EXOC6B,TNKS,TEX2,ENTPD1,BRAF,PPARD,ACSL4,SLC22…
GO:BP	positive regulation of cell communication	GO:0010647	FALSE	4.984075195976654e-15	14.302415413991069	1990	433	88	26944	OSBPL8,GNAQ,PHLPP1,AKT3,PTPRJ,FNIP2,EXOC4,ZEB2,RAPGEF2,TNS3,CACNA1D,CD86,RAB8B,LRRK2,SASH1,VAV3,HTR7,SIK3,APP,RBM47,WWOX,CLEC4D,AMBRA1,FNIP1,HIF1A,LARGE1,CD38,JAK2,NRG1,IL1A,LYN,SRC,MBD5,ERN1,VEGFA,INHBA,ESR1,STK3,CTSS,TNKS,ACVR2A,MAP2K4,PTEN,BRAF,SPECC1L,NCOA2,MGAT5,PPARD,NFAT5,ACSL4,PDE8A,ITPR1,MIF,OASL1,FABP5,GPNMB,ITGAV,C3,PSAP,FRS2,TRPM2,JAG1,PIK3R1,NLRP3,TGFBR1,F10,PTPN2,BCL2L11,WAC,FPR3,DI…
GO:BP	positive regulation of signaling	GO:0023056	FALSE	4.984075195976654e-15	14.302415413991069	1990	433	88	26944	OSBPL8,GNAQ,PHLPP1,AKT3,PTPRJ,FNIP2,EXOC4,ZEB2,RAPGEF2,TNS3,CACNA1D,CD86,RAB8B,LRRK2,SASH1,VAV3,HTR7,SIK3,APP,RBM47,WWOX,CLEC4D,AMBRA1,FNIP1,HIF1A,LARGE1,CD38,JAK2,NRG1,IL1A,LYN,SRC,MBD5,ERN1,VEGFA,INHBA,ESR1,STK3,CTSS,TNKS,ACVR2A,MAP2K4,PTEN,BRAF,SPECC1L,NCOA2,MGAT5,PPARD,NFAT5,ACSL4,PDE8A,ITPR1,MIF,OASL1,FABP5,GPNMB,ITGAV,C3,PSAP,FRS2,TRPM2,JAG1,PIK3R1,NLRP3,TGFBR1,F10,PTPN2,BCL2L11,WAC,FPR3,DI…
GO:BP	anatomical structure morphogenesis	GO:0009653	FALSE	6.783382427895509e-15	14.168553697951502	2761	433	107	26944	FMNL2,GNAQ,EXT1,MYO1E,AKT3,PTPRJ,EXOC4,ARHGAP24,ABI1,ZEB2,MAN2A1,RAPGEF2,RERE,RREB1,HEXB,HDAC9,LRRK2,SASH1,VAV3,SIK3,NFE2L2,APP,DIAPH2,WWOX,PDPN,BCAS3,HIF1A,LARGE1,CLIC4,NEDD4L,MALT1,VPS13B,EPB41L2,SLC23A2,NRG1,IL1A,ALCAM,MRTFA,IFRD1,B4GALT5,SRC,SGPL1,AP3B1,SRGAP2,VEGFA,INHBA,BCL6,NRP2,PDLIM5,FOXP4,MYO5A,RHOQ,ESR1,FOXO3,SH3KBP1,STK3,FMN1,ACVR2A,PTEN,SIPA1L1,BRAF,SPECC1L,JAK1,EPB41,CHST11,FAM20C,D…
GO:BP	activation of immune response	GO:0002253	FALSE	9.285994718459657e-15	14.03217156768088	533	433	43	26944	TRAF3,PTPRJ,PLCL2,CD86,VAV3,IRAK2,APP,RFTN1,RABGEF1,CD38,MALT1,CBLB,LYN,PDE4B,SRC,AP3B1,ESR1,CLEC4E,PTEN,TEC,BRAF,OASL1,C3,NFKBIZ,SH2B2,TNIP1,RGCC,PIK3R1,CMKLR1,NLRP3,PTPN2,FPR3,CFB,NOD2,RIPK2,TRAF6,TREM2,NFKB1,CD40,CD14,ZC3HAV1,RSAD2,CLEC4N
GO:BP	inflammatory response	GO:0006954	FALSE	1.039634768417654e-14	13.98311920485452	811	433	53	26944	CAMK1D,CERS6,IL31RA,NOS2,EXT1,SLC7A2,ZEB2,AOAH,LRRK2,NFE2L2,APP,SAA3,PLA2G7,RABGEF1,HIF1A,LARGE1,JAK2,IL1A,LYN,AP3B1,BCL6,MYO5A,ESR1,CTSS,TNFAIP6,ORM1,PPARD,MIF,ITGAV,C3,NFKBIZ,TNIP1,H2-M2,CMKLR1,NLRP3,PTPN2,FPR3,RPS6KA5,CYBB,NOD2,OLR1,CST7,PTGS2,TREM2,HMOX1,PTGES,SLC11A1,BST1,NFKB1,CD14,APOE,IER3,CCRL2
GO:BP	phosphate-containing compound metabolic process	GO:0006796	FALSE	1.8395505349799897e-14	13.735288277003013	2428	433	98	26944	CAMK1D,CDK8,GPHN,PID1,IL31RA,PHLPP1,AKT3,ACSL1,PTPRJ,FNIP2,PDE7B,RAPGEF2,TNS3,SMYD3,HEXB,CD86,SLCO3A1,PLEK,LRRK2,SIK3,IRAK2,APP,PLA2G4A,SGMS2,PLA2G7,AMBRA1,FNIP1,RABGEF1,UVRAG,HIF1A,PPM1H,JAK2,NRG1,DYRK1A,DAPK1,LYN,MAP4K4,PDE4B,SRC,ERN1,MOB3B,VEGFA,INHBA,RHOQ,GPD2,STK3,LPCAT2,MAP4K3,ACVR2A,MAP2K4,ENTPD1,PTEN,TEC,BRAF,JAK1,FAM20C,PPARD,PRDX5,ACSL4,PDE8A,MIF,MET,FABP5,PEAK1,GPNMB,C3,TEX14,PIK3R1,AT…
GO:BP	macromolecule modification	GO:0043412	FALSE	2.3942646120952812e-14	13.620827853419089	2937	433	110	26944	CAMK1D,CDK8,PID1,IL31RA,FBXL5,NOS2,PHLPP1,TRAF3,EXT1,AKT3,FBXL17,PTPRJ,FNIP2,MAN2A1,RAPGEF2,RNF149,SMYD3,CD86,SLCO3A1,ATG10,LRRK2,TANK,SASH1,SIK3,PARP8,NFE2L2,IRAK2,MAN1A,APP,ST3GAL1,RBM47,AMBRA1,FNIP1,RABGEF1,RFFL,HIF1A,LARGE1,PPM1H,RNF217,NEDD4L,JAK2,NRG1,DYRK1A,DAPK1,CBLB,LYN,BABAM2,CDKAL1,B4GALT5,MAP4K4,SRC,F13A1,ERN1,MOB3B,AP3B1,FBXO11,VEGFA,INHBA,ARIH1,ST3GAL3,NSMCE2,NXN,STK3,MAP4K3,TNKS,AC…
GO:BP	phosphorus metabolic process	GO:0006793	FALSE	3.3658031904745405e-14	13.47291128223714	2450	433	98	26944	CAMK1D,CDK8,GPHN,PID1,IL31RA,PHLPP1,AKT3,ACSL1,PTPRJ,FNIP2,PDE7B,RAPGEF2,TNS3,SMYD3,HEXB,CD86,SLCO3A1,PLEK,LRRK2,SIK3,IRAK2,APP,PLA2G4A,SGMS2,PLA2G7,AMBRA1,FNIP1,RABGEF1,UVRAG,HIF1A,PPM1H,JAK2,NRG1,DYRK1A,DAPK1,LYN,MAP4K4,PDE4B,SRC,ERN1,MOB3B,VEGFA,INHBA,RHOQ,GPD2,STK3,LPCAT2,MAP4K3,ACVR2A,MAP2K4,ENTPD1,PTEN,TEC,BRAF,JAK1,FAM20C,PPARD,PRDX5,ACSL4,PDE8A,MIF,MET,FABP5,PEAK1,GPNMB,C3,TEX14,PIK3R1,AT…
GO:BP	regulation of developmental process	GO:0050793	FALSE	3.41937891584481e-14	13.466052770527677	2698	433	104	26944	SLC8A1,CAMK1D,FMNL2,MITF,LDLRAD4,GNAQ,AKT3,ZEB2,MAN2A1,RAPGEF2,RREB1,HEXB,CD86,LRRK2,ARID1B,SASH1,NFE2L2,APP,DIAPH2,JARID2,SGMS2,ASAP1,PDPN,AMBRA1,FNIP1,HIF1A,NEDD4L,JAK2,MALT1,EPB41L2,SLC23A2,NRG1,IL1A,LYN,IFRD1,B4GALT5,MAP4K4,SRC,MBD5,SGPL1,AP3B1,VEGFA,INHBA,BCL6,PDLIM5,FOXP4,RHOQ,ESR1,FOXO3,SH3KBP1,STK3,SOD2,SRGN,RFX3,TNFAIP6,ATP11C,ZFHX3,ACVR2A,SUCO,HDAC8,PTEN,SIPA1L1,BRAF,JAK1,EPB41,FAM20C,N…
GO:BP	positive regulation of biosynthetic process	GO:0009891	FALSE	3.6900409691072144e-14	13.43296881200939	2827	433	107	26944	MITF,ETV6,PID1,NOS2,TRAF3,PTPRJ,ZEB2,MAML2,RERE,SMYD3,RREB1,HEXB,CD86,CREB5,LRRK2,TANK,ZFP407,ELL2,NFE2L2,APP,PLA2G4A,RBM47,WWOX,RFTN1,BCAS3,HIF1A,CD38,JAK2,MALT1,NRG1,IL1A,DYRK1A,MRTFA,RYBP,IFRD1,PDE4B,SRC,ERN1,AP3B1,VEGFA,INHBA,CD274,RHOQ,ESR1,MDFIC,FOXO3,HSPH1,SOD2,ZFP516,RFX3,NUP98,CLEC4E,MAML3,TNKS,ZFHX3,ACVR2A,SUCO,MAP2K4,PTEN,BRAF,NCOA2,TCF12,PPARD,NFAT5,PRDX5,MIF,MED13,APOBEC1,MET,HIVEP1,…
GO:BP	regulation of response to stress	GO:0080134	FALSE	7.715883745638759e-14	13.11261432444546	1374	433	69	26944	TRAF3,SLC7A2,AOAH,RREB1,CD86,LRRK2,ARID1B,ARG2,NFE2L2,IRAK2,APP,RBM47,DIAPH2,RFTN1,MCTP1,SLC7A11,RABGEF1,HIF1A,JAK2,NRG1,IL1A,DYRK1A,LYN,BABAM2,MAP4K4,SRC,ERN1,AP3B1,BCL6,ESR1,CTSS,TNFAIP6,CLEC4E,PTEN,BRAF,GRINA,PPARD,MIF,OASL1,SUPT3,C3,MDM2,NFKBIZ,TRPM2,TNIP1,H2-M2,PIK3R1,NLRP3,PTPN2,FPR3,NOD2,HTRA1,RIPK2,GCH1,CST7,TRAF6,PTGS2,TREM2,PTGES,BST1,NFKB1,CD40,CD14,APOE,IER3,ACOD1,ZC3HAV1,RSAD2,CLEC4N
GO:BP	cell development	GO:0048468	FALSE	7.794553225981251e-14	13.108208772976964	3202	433	115	26944	CAMK1D,MITF,CERS6,ETV6,IL31RA,GNAQ,EXT1,MYO1E,PTPRJ,ABI1,ZEB2,MAN2A1,RAPGEF2,RERE,SMYD3,HEXB,PLCL2,PLEK,LRRK2,ARID1B,HTR7,NFE2L2,APP,ST3GAL1,RBM47,DIAPH2,CLEC4D,ASAP1,AMBRA1,FNIP1,HIF1A,LARGE1,CD38,CLIC4,NEDD4L,TPD52,JAK2,MALT1,VPS13B,SLC23A2,NRG1,IL1A,ALCAM,SDC1,FAM172A,LYN,MRTFA,IFRD1,B4GALT5,MAP4K4,SRC,FNDC3A,SGPL1,AP3B1,SRGAP2,VEGFA,INHBA,BCL6,NRP2,PDLIM5,ESR1,FOXO3,STK3,WDR7,SOD2,RFX3,TNFAIP…
GO:BP	hemopoiesis	GO:0030097	FALSE	1.0218445410491885e-13	12.990615170835312	1044	433	59	26944	MITF,ETV6,IL31RA,EXT1,MYO1E,PTPRJ,ABI1,PLCL2,PLEK,ARID1B,NFE2L2,APP,ST3GAL1,RBM47,CLEC4D,AMBRA1,FNIP1,HIF1A,LARGE1,TPD52,JAK2,MALT1,IL1A,LYN,SRC,SGPL1,AP3B1,VEGFA,INHBA,BCL6,FOXO3,STK3,WDR7,SOD2,TNFAIP6,ATP11C,CLEC4E,ACVR2A,BRAF,FAM20C,DOCK1,ZFP609,PSAP,NFKBIZ,TRPM2,JAG1,PIK3R1,NLRP3,PTPN2,RIPK2,DCSTAMP,TRAF6,TREM2,TIPARP,UBD,ALAS1,MAFB,MERTK,RSAD2
GO:BP	cellular process	GO:0009987	FALSE	1.4226991668793482e-13	12.846886922808508	20967	433	401	26944	LRMDA,SLC8A1,CAMK1D,FMNL2,TRPS1,MITF,OSBPL8,CDK8,GPHN,ATRNL1,LDLRAD4,ABCA1,CERS6,ETV6,PID1,KPNA1,IL31RA,GNAQ,NOS2,PHLPP1,TRAF3,DENND1A,EXT1,MYO1E,AKT3,ACSL1,LPP,ABTB2,FBXL17,PTPRJ,AFF1,FNIP2,EXOC4,ARHGAP24,LRCH1,ABI1,SLC7A2,ZEB2,TBC1D5,MAN2A1,MAML2,PDE7B,RAPGEF2,RERE,TNS3,AOAH,CACNA1D,ARHGAP10,GNG12,LRRC8C,RNF149,SMYD3,SND1,FARS2,RREB1,HEXB,PLCL2,CD86,HDAC9,CREB5,RAB8B,SLCO3A1,PLEK,SESTD1,ATG10,L…
GO:BP	positive regulation of cellular biosynthetic process	GO:0031328	FALSE	1.519076184538783e-13	12.818420444902776	2799	433	105	26944	MITF,ETV6,PID1,NOS2,TRAF3,PTPRJ,ZEB2,MAML2,RERE,SMYD3,RREB1,HEXB,CD86,CREB5,LRRK2,TANK,ZFP407,ELL2,NFE2L2,APP,PLA2G4A,RBM47,WWOX,RFTN1,BCAS3,HIF1A,CD38,JAK2,MALT1,NRG1,IL1A,DYRK1A,MRTFA,RYBP,IFRD1,PDE4B,SRC,ERN1,AP3B1,VEGFA,INHBA,CD274,RHOQ,ESR1,MDFIC,FOXO3,HSPH1,SOD2,ZFP516,RFX3,NUP98,CLEC4E,MAML3,TNKS,ZFHX3,ACVR2A,MAP2K4,PTEN,BRAF,NCOA2,TCF12,PPARD,NFAT5,MIF,MED13,APOBEC1,MET,HIVEP1,ZFP609,SUPT…
GO:BP	regulation of primary metabolic process	GO:0080090	FALSE	1.8590166188303065e-13	12.730716727799894	5407	433	161	26944	CAMK1D,TRPS1,MITF,CDK8,ETV6,PID1,IL31RA,FBXL5,NOS2,PHLPP1,TRAF3,PTPRJ,FNIP2,ZEB2,MAML2,RAPGEF2,RERE,SMYD3,RREB1,HEXB,CD86,HDAC9,CREB5,SLCO3A1,PLEK,LRRK2,ARID1B,TANK,ZFP407,SASH1,ELL2,NFE2L2,TACO1,APP,PLA2G4A,RBM47,WWOX,JARID2,AMBRA1,FNIP1,BCAS3,SLC7A11,RABGEF1,RFFL,HIF1A,CD38,RNF217,NEDD4L,JAK2,CPEB4,NRG1,IL1A,DYRK1A,DAPK1,CBLB,FAM172A,CDYL2,LYN,MRTFA,BABAM2,RYBP,IFRD1,SRC,ERN1,MOB3B,AP3B1,FBXO11…
GO:BP	immune response-regulating cell surface receptor signaling pathway	GO:0002768	FALSE	2.4497766958373813e-13	12.610873501017291	291	433	31	26944	PTPRJ,PLCL2,VAV3,IRAK2,RFTN1,CLEC4D,RABGEF1,CD38,MALT1,CBLB,LYN,PDE4B,CLEC4E,PTEN,TEC,BRAF,C3,NFKBIZ,SH2B2,PIK3R1,CMKLR1,PTPN2,FPR3,NOD2,RIPK2,TRAF6,TREM2,NFKB1,CD40,CD14,CLEC4N
GO:BP	regulation of nitrogen compound metabolic process	GO:0051171	FALSE	2.7050043140101186e-13	12.567832037932904	5229	433	157	26944	CAMK1D,TRPS1,MITF,CDK8,ETV6,PID1,IL31RA,FBXL5,NOS2,PHLPP1,TRAF3,PTPRJ,FNIP2,ZEB2,MAML2,RAPGEF2,RERE,SMYD3,RREB1,HEXB,CD86,HDAC9,CREB5,SLCO3A1,LRRK2,ARID1B,TANK,ZFP407,SASH1,ELL2,NFE2L2,TACO1,APP,RBM47,WWOX,JARID2,AMBRA1,FNIP1,BCAS3,SLC7A11,RABGEF1,RFFL,HIF1A,CD38,RNF217,NEDD4L,JAK2,CPEB4,NRG1,IL1A,DYRK1A,DAPK1,CBLB,FAM172A,CDYL2,LYN,MRTFA,BABAM2,RYBP,IFRD1,SRC,ERN1,MOB3B,AP3B1,FBXO11,VEGFA,INHBA,…
GO:BP	positive regulation of macromolecule biosynthetic process	GO:0010557	FALSE	2.8144332978287857e-13	12.55060903967678	2697	433	102	26944	MITF,ETV6,PID1,NOS2,TRAF3,PTPRJ,ZEB2,MAML2,RERE,SMYD3,RREB1,HEXB,CD86,CREB5,LRRK2,TANK,ZFP407,ELL2,NFE2L2,APP,RBM47,WWOX,RFTN1,BCAS3,HIF1A,CD38,JAK2,MALT1,NRG1,IL1A,DYRK1A,MRTFA,RYBP,IFRD1,PDE4B,SRC,ERN1,AP3B1,VEGFA,INHBA,CD274,RHOQ,ESR1,MDFIC,FOXO3,HSPH1,ZFP516,RFX3,NUP98,CLEC4E,MAML3,TNKS,ZFHX3,ACVR2A,MAP2K4,PTEN,BRAF,NCOA2,TCF12,PPARD,NFAT5,MIF,MED13,APOBEC1,MET,HIVEP1,ZFP609,SUPT3,C3,ARF4,GTF…
GO:BP	positive regulation of intracellular signal transduction	GO:1902533	FALSE	5.412741608913925e-13	12.266582704573693	1050	433	58	26944	OSBPL8,PHLPP1,AKT3,PTPRJ,FNIP2,EXOC4,RAPGEF2,TNS3,CD86,SASH1,VAV3,SIK3,APP,CLEC4D,AMBRA1,FNIP1,JAK2,NRG1,IL1A,LYN,SRC,ERN1,VEGFA,INHBA,ESR1,STK3,ACVR2A,MAP2K4,PTEN,BRAF,SPECC1L,PPARD,NFAT5,PDE8A,MIF,GPNMB,ITGAV,C3,PSAP,FRS2,NLRP3,TGFBR1,F10,PTPN2,BCL2L11,WAC,FPR3,KSR2,NOD2,RIPK2,TRAF6,IRS2,TREM2,UBD,CD40,APOE,ZC3HAV1,CLEC4N
GO:BP	cell adhesion	GO:0007155	FALSE	5.737225252156614e-13	12.24129809872341	1465	433	70	26944	EXT1,LPP,PTPRJ,RREB1,CD86,PLEK,ARID1B,VAV3,ARG2,APP,PDPN,AMBRA1,SLC7A11,CYTH1,JAK2,MALT1,SLC23A2,NRG1,IL1A,ALCAM,CBLB,LYN,CARMIL1,SRC,FNDC3A,ERN1,AP3B1,VEGFA,BCL6,CD274,FOXO3,HSPH1,TNFAIP6,FMN1,PCDH7,PTEN,BRAF,SPECC1L,JAK1,DOCK1,PPARD,NFAT5,NTNG2,ASTN2,ADAM9,PEAK1,GPNMB,ZFP609,ITGAV,NFKBIZ,TNIP1,PAG1,H2-M2,RGCC,JAG1,PIK3R1,SDC4,NLRP3,PTPN2,BCL2L11,DST,DISC1,RIPK2,OLR1,ITGAM,TRAF6,ADAM19,BST1,MERT…
GO:BP	regulation of cell adhesion	GO:0030155	FALSE	6.016277789832864e-13	12.220672119257125	800	433	50	26944	PTPRJ,RREB1,CD86,ARID1B,VAV3,ARG2,PDPN,AMBRA1,CYTH1,JAK2,MALT1,NRG1,IL1A,CBLB,LYN,CARMIL1,SRC,AP3B1,VEGFA,BCL6,CD274,FOXO3,HSPH1,FMN1,PTEN,BRAF,SPECC1L,JAK1,DOCK1,NFAT5,ADAM9,PEAK1,GPNMB,ZFP609,ITGAV,NFKBIZ,PAG1,H2-M2,RGCC,JAG1,PIK3R1,SDC4,NLRP3,PTPN2,DISC1,RIPK2,TRAF6,ADAM19,BST1,CD63
GO:BP	regulation of response to external stimulus	GO:0032101	FALSE	8.090398092899738e-13	12.092030108141003	1126	433	60	26944	CAMK1D,TRAF3,PTPRJ,SLC7A2,AOAH,CD86,LRRK2,SASH1,ARG2,NFE2L2,IRAK2,APP,RBM47,RFTN1,PLA2G7,RABGEF1,JAK2,NRG1,LYN,SRC,AP3B1,VEGFA,BCL6,ESR1,CTSS,TNFAIP6,CLEC4E,PTEN,BRAF,PPARD,MIF,OASL1,MET,C3,NFKBIZ,TNIP1,H2-M2,PIK3R1,CMKLR1,NLRP3,PTPN2,FPR3,NOD2,HTRA1,RIPK2,CST7,TRAF6,PTGS2,TREM2,PTGES,BST1,NFKB1,CD40,CD14,APOE,IER3,ACOD1,ZC3HAV1,RSAD2,CLEC4N
GO:BP	regulation of leukocyte activation	GO:0002694	FALSE	9.735235978299986e-13	12.011653516888538	578	433	42	26944	SLC7A2,CD86,LRRK2,ARID1B,VAV3,ARG2,PLA2G4A,CLEC4D,AMBRA1,RABGEF1,CD38,JAK2,MALT1,IL1A,CBLB,LYN,AP3B1,BCL6,CD274,FOXO3,HSPH1,SH3KBP1,ATP11C,PTEN,BRAF,MIF,GPNMB,ZFP609,NFKBIZ,PAG1,H2-M2,SDC4,NLRP3,PTPN2,NOD2,RIPK2,CST7,TRAF6,IRS2,TREM2,CD40,MERTK
GO:BP	regulation of defense response	GO:0031347	FALSE	1.0388968832061983e-12	11.983427556655489	811	433	50	26944	TRAF3,SLC7A2,AOAH,CD86,LRRK2,ARG2,NFE2L2,IRAK2,APP,RBM47,RFTN1,RABGEF1,JAK2,LYN,SRC,AP3B1,BCL6,ESR1,CTSS,TNFAIP6,CLEC4E,PTEN,PPARD,OASL1,C3,NFKBIZ,TNIP1,H2-M2,PIK3R1,NLRP3,PTPN2,FPR3,NOD2,HTRA1,RIPK2,CST7,TRAF6,PTGS2,TREM2,PTGES,BST1,NFKB1,CD40,CD14,APOE,IER3,ACOD1,ZC3HAV1,RSAD2,CLEC4N
GO:BP	response to endogenous stimulus	GO:0009719	FALSE	1.0758725885944658e-12	11.968239157430526	1935	433	82	26944	OSBPL8,LDLRAD4,PID1,GNAQ,NOS2,EXT1,AKT3,ACSL1,PTPRJ,ZEB2,RAPGEF2,SMYD3,HDAC9,LRRK2,ARID1B,SLC1A2,HTR7,NFE2L2,APP,WWOX,BCAS3,HIF1A,CD38,JAK2,CPEB4,SDC1,LYN,SLC2A1,SRC,MBD5,ERN1,VEGFA,INHBA,NRP2,MYO5A,RHOQ,ESR1,FOXO3,CPEB2,CTSS,TNFAIP6,ZFHX3,ACVR2A,HDAC8,PTEN,BRAF,CHST11,FAM20C,NCOA2,TCF12,PPARD,PDE8A,ITPR1,HIVEP1,ADAM9,GCLC,MDM2,NFKBIZ,FRS2,SH2B2,TRPM2,PIK3R1,NLRP3,TGFBR1,PTPN2,FPR3,CYBB,BCKDHB,NO…
GO:BP	cellular localization	GO:0051641	FALSE	1.1818627549901675e-12	11.927432953413424	3502	433	119	26944	OSBPL8,GPHN,ABCA1,PID1,KPNA1,GNAQ,NOS2,DENND1A,MYO1E,EXOC4,SLC7A2,TBC1D5,RAPGEF2,CACNA1D,SMYD3,HEXB,RAB8B,PLEK,LRRK2,SLC1A2,SIK3,BTBD9,MAN1A,APP,PLA2G4A,DIAPH2,JARID2,RFTN1,ASAP1,VTI1A,MCTP1,SLC7A11,RABGEF1,APBA1,UVRAG,RFFL,HIF1A,MPP7,LARGE1,CD38,NEDD4L,JAK2,MALT1,VPS13B,EPB41L2,NRG1,IL1A,SDC1,LYN,MAP4K4,SRC,RSRC1,AP3B1,FTH1,VEGFA,BCL6,MYO5A,RHOQ,ESR1,MDFIC,SH3KBP1,STK3,SRGN,KPNA4,RFX3,TNFAIP6,NU…
GO:BP	multicellular organismal-level homeostasis	GO:0048871	FALSE	1.498437885530184e-12	11.824361255074422	912	433	53	26944	FBXL5,EXT1,AKT3,ACSL1,ZEB2,TNS3,PLCL2,BTBD9,PLA2G4A,SLC7A11,HIF1A,CD38,JAK2,VPS13B,IL1A,LYN,SLC2A1,PDE4B,SRC,AP3B1,VEGFA,INHBA,BCL6,FOXO3,SOD2,ZFP516,CTSS,ACVR2A,PPARD,NFAT5,PRDX5,MIF,FABP5,P2RY14,ITGAV,NFKBIZ,SH2B2,TRPM2,CMKLR1,PTPN2,BCL2L11,KSR2,NOD2,DCSTAMP,TRAF6,PTGS2,HMOX1,PTGES,SLC11A1,APOE,ALAS1,MAFB,MERTK
GO:BP	regulation of cellular metabolic process	GO:0031323	FALSE	2.1694919247386333e-12	11.663641962058382	6425	433	178	26944	CAMK1D,TRPS1,MITF,CDK8,ETV6,PID1,IL31RA,NOS2,PHLPP1,TRAF3,AKT3,PTPRJ,AFF1,FNIP2,ZEB2,MAML2,RAPGEF2,RERE,SMYD3,SND1,RREB1,HEXB,CD86,HDAC9,CREB5,SLCO3A1,PLEK,LRRK2,ARID1B,TANK,ZFP407,ELL2,ARG2,NFE2L2,TACO1,APP,PLA2G4A,RBM47,WWOX,JARID2,RFTN1,AMBRA1,FNIP1,BCAS3,SLC7A11,RABGEF1,APBA1,UVRAG,HIF1A,CD38,JAK2,MALT1,CPEB4,ZCCHC7,NRG1,IL1A,DYRK1A,DAPK1,FAM172A,CDYL2,LYN,MRTFA,BABAM2,RYBP,IFRD1,PDE4B,SRC,ER…
GO:BP	phosphorylation	GO:0016310	FALSE	2.369886893538727e-12	11.625272380860858	1470	433	69	26944	CAMK1D,CDK8,PID1,IL31RA,PHLPP1,AKT3,PTPRJ,FNIP2,RAPGEF2,SMYD3,CD86,SLCO3A1,LRRK2,SIK3,IRAK2,APP,SGMS2,FNIP1,RABGEF1,JAK2,NRG1,DYRK1A,DAPK1,LYN,MAP4K4,SRC,ERN1,MOB3B,VEGFA,INHBA,STK3,MAP4K3,ACVR2A,MAP2K4,PTEN,TEC,BRAF,JAK1,FAM20C,MIF,MET,PEAK1,GPNMB,C3,TEX14,PIK3R1,ATXN1,HK2,TGFBR1,STK38L,PTPN2,SIK2,FPR3,RPS6KA5,KSR2,NOD2,RBKS,RIPK2,MYO3B,PAPSS2,IRS2,PTGS2,TREM2,BST1,CD40,PTPRO,MERTK,CLEC4N,CHKA
GO:BP	cell population proliferation	GO:0008283	FALSE	2.8796472506674392e-12	11.540660708932215	2168	433	87	26944	MITF,ETV6,PID1,KPNA1,IL31RA,GNAQ,NOS2,EXT1,AKT3,PTPRJ,FNIP2,ZEB2,RAPGEF2,RERE,TNS3,RREB1,PLCL2,CD86,LRRK2,VAV3,ARG2,APP,PLA2G4A,JARID2,PDPN,AMBRA1,FNIP1,SLC7A11,HIF1A,CD38,TPD52,JAK2,MALT1,NRG1,IL1A,CBLB,LYN,SRC,ERN1,FTH1,VEGFA,INHBA,BCL6,CD274,ESR1,FOXO3,STK3,SOD2,ACVR2A,PTEN,BRAF,CHST11,PPARD,ITPR1,MIF,APOBEC1,GPNMB,ZFP609,ITGAV,MDM2,NFKBIZ,FRS2,H2-M2,RGCC,JAG1,PIK3R1,ATXN1,SDC4,TGFBR1,PTPN2,DI…
GO:BP	protein phosphorylation	GO:0006468	FALSE	4.075196499757164e-12	11.389851445401858	1236	433	62	26944	CAMK1D,CDK8,PID1,IL31RA,PHLPP1,AKT3,PTPRJ,FNIP2,RAPGEF2,SMYD3,CD86,SLCO3A1,LRRK2,SIK3,IRAK2,APP,FNIP1,RABGEF1,JAK2,NRG1,DYRK1A,DAPK1,LYN,MAP4K4,SRC,ERN1,MOB3B,VEGFA,INHBA,STK3,MAP4K3,ACVR2A,MAP2K4,PTEN,TEC,BRAF,JAK1,FAM20C,MIF,MET,PEAK1,GPNMB,C3,TEX14,PIK3R1,TGFBR1,STK38L,PTPN2,SIK2,FPR3,RPS6KA5,KSR2,NOD2,RIPK2,MYO3B,PTGS2,TREM2,BST1,CD40,PTPRO,MERTK,CLEC4N
GO:BP	response to oxidative stress	GO:0006979	FALSE	4.198918768078235e-12	11.376862527104528	417	433	35	26944	LRRK2,NFE2L2,APP,MCTP1,SLC7A11,HIF1A,CD38,JAK2,SLC23A2,IL1A,DAPK1,SDC1,SRC,ERN1,FOXO3,SOD2,KPNA4,PRDX6,MAP2K4,PRDX5,BNIP3,MET,ADAM9,PSAP,GCLC,MDM2,TRPM2,TXNRD1,MGST1,GCH1,PTGS2,HMOX1,NFKB1,MSRA,APOE
GO:BP	positive regulation of cell migration	GO:0030335	FALSE	4.7868447523517405e-12	11.319950657391729	577	433	41	26944	CAMK1D,AKT3,PTPRJ,RAPGEF2,RREB1,HDAC9,SASH1,NFE2L2,APP,PLA2G7,PDPN,BCAS3,HIF1A,JAK2,IL1A,LYN,CARMIL1,SRC,VEGFA,MYO5A,CD274,SOD2,TNFAIP6,DOCK1,MGAT5,MET,ADAM9,IQSEC1,GPNMB,ZFP609,ITGAV,MDM2,PIK3R1,CMKLR1,TGFBR1,FPR3,IRS2,PTGS2,TREM2,HMOX1,CD40
GO:BP	positive regulation of cell motility	GO:2000147	FALSE	5.382193391878291e-12	11.269040701310907	607	433	42	26944	CAMK1D,AKT3,PTPRJ,RAPGEF2,RREB1,HDAC9,SASH1,NFE2L2,APP,PLA2G7,PDPN,BCAS3,HIF1A,JAK2,IL1A,LYN,CARMIL1,SRC,VEGFA,BCL6,MYO5A,CD274,SOD2,TNFAIP6,DOCK1,MGAT5,MET,ADAM9,IQSEC1,GPNMB,ZFP609,ITGAV,MDM2,PIK3R1,CMKLR1,TGFBR1,FPR3,IRS2,PTGS2,TREM2,HMOX1,CD40
GO:BP	response to nitrogen compound	GO:1901698	FALSE	6.317905113292106e-12	11.19942690091949	1283	433	63	26944	OSBPL8,PID1,GNAQ,EXT1,AKT3,PTPRJ,RAPGEF2,HDAC9,LRRK2,ARID1B,SLC1A2,HTR7,NFE2L2,APP,RFTN1,LY6I,LARGE1,JAK2,CPEB4,IL1A,SDC1,LYN,SLC2A1,SRC,MBD5,ERN1,INHBA,MYO5A,RHOQ,FOXO3,CPEB2,HDAC8,PTEN,BRAF,NCOA2,TCF12,ITPR1,LY6C2,ITGAV,GCLC,MDM2,NFKBIZ,SH2B2,TRPM2,JAG1,PIK3R1,NLRP3,PTPN2,FPR3,MGST1,CYBB,HOMER1,BCKDHB,KYNU,NOD2,RIPK2,IRS2,PTGS2,TREM2,NFKB1,DENND4C,APOE,ZC3HAV1
GO:BP	nervous system development	GO:0007399	FALSE	6.494975663813207e-12	11.187422471856763	2529	433	95	26944	CAMK1D,CERS6,ETV6,GNAQ,EXT1,AKT3,FBXL17,PTPRJ,EXOC4,ABI1,ZEB2,MAN2A1,RAPGEF2,RERE,HEXB,HDAC9,LRRK2,SLC1A2,HTR7,NFE2L2,APP,DIAPH2,ASAP1,AMBRA1,SLC7A11,HIF1A,LARGE1,CD38,NEDD4L,JAK2,MALT1,VPS13B,SLC23A2,NRG1,ALCAM,LYN,MRTFA,SLC2A1,IFRD1,B4GALT5,MAP4K4,SRC,MBD5,SPATA5,SRGAP2,VEGFA,INHBA,BCL6,NRP2,PDLIM5,MYO5A,FOXO3,STK3,SOD2,ZFHX3,PTEN,SIPA1L1,BRAF,SPECC1L,TCF12,IMMP2L,PPARD,BNIP3,MTHFD1L,ACSL4,ITPR…
GO:BP	cellular response to endogenous stimulus	GO:0071495	FALSE	1.1209962857065679e-11	10.950395826387911	1629	433	72	26944	OSBPL8,LDLRAD4,PID1,GNAQ,EXT1,AKT3,ACSL1,PTPRJ,ZEB2,RAPGEF2,SMYD3,HDAC9,LRRK2,ARID1B,SLC1A2,HTR7,NFE2L2,APP,WWOX,BCAS3,HIF1A,JAK2,CPEB4,SRC,MBD5,ERN1,VEGFA,INHBA,NRP2,MYO5A,RHOQ,ESR1,FOXO3,CPEB2,CTSS,TNFAIP6,ACVR2A,HDAC8,PTEN,BRAF,CHST11,FAM20C,NCOA2,PPARD,PDE8A,ITPR1,HIVEP1,ADAM9,GCLC,MDM2,NFKBIZ,FRS2,SH2B2,TRPM2,PIK3R1,NLRP3,TGFBR1,PTPN2,FPR3,CYBB,NOD2,HTRA1,RIPK2,DCSTAMP,IRS2,PTGS2,TREM2,NFKB1…
GO:BP	cellular component organization	GO:0016043	FALSE	1.1985047459934812e-11	10.921360241851689	7612	433	198	26944	CAMK1D,FMNL2,MITF,OSBPL8,GPHN,ABCA1,ETV6,EXT1,MYO1E,AKT3,PTPRJ,FNIP2,EXOC4,ARHGAP24,ABI1,ZEB2,TBC1D5,MAN2A1,RAPGEF2,RERE,TNS3,ARHGAP10,LRRC8C,SMYD3,RREB1,HEXB,HDAC9,RAB8B,PLEK,ATG10,LRRK2,ARID1B,SLC1A2,VAV3,HTR7,SIK3,NFE2L2,BTBD9,TACO1,APP,PLA2G4A,DIAPH2,JARID2,RFTN1,PLA2G7,ASAP1,PDPN,VTI1A,AMBRA1,MCTP1,FNIP1,BCAS3,SLC7A11,LRRC8D,RABGEF1,UVRAG,PSTPIP2,HIF1A,MPP7,LARGE1,CD38,NEDD4L,JAK2,ATP8B4,P4H…
GO:BP	immune response	GO:0006955	FALSE	1.367068801996059e-11	10.864209627659458	1945	433	80	26944	IL31RA,NOS2,TRAF3,EXT1,PTPRJ,PLCL2,CD86,VAV3,ARG2,NFE2L2,IRAK2,APP,PLA2G4A,ST3GAL1,RBM47,RFTN1,CLEC4D,RABGEF1,CD38,JAK2,MALT1,IL1A,DAPK1,ALCAM,CBLB,LYN,PDE4B,SRC,AP3B1,FTH1,VEGFA,BCL6,CD274,ESR1,CTSS,CLEC4E,PTEN,TEC,BRAF,JAK1,MIF,OASL1,P2RY14,C3,NFKBIZ,SH2B2,TNIP1,PAG1,H2-M2,RGCC,JAG1,PIK3R1,LYST,CMKLR1,NLRP3,PTPN2,FPR3,RNF19B,CFB,CYBB,KYNU,NOD2,RIPK2,ITGAM,GCH1,CST7,TRAF6,TREM2,HMOX1,UBD,SLC11A1…
GO:BP	positive regulation of locomotion	GO:0040017	FALSE	1.3968806588443255e-11	10.854840695832346	624	433	42	26944	CAMK1D,AKT3,PTPRJ,RAPGEF2,RREB1,HDAC9,SASH1,NFE2L2,APP,PLA2G7,PDPN,BCAS3,HIF1A,JAK2,IL1A,LYN,CARMIL1,SRC,VEGFA,BCL6,MYO5A,CD274,SOD2,TNFAIP6,DOCK1,MGAT5,MET,ADAM9,IQSEC1,GPNMB,ZFP609,ITGAV,MDM2,PIK3R1,CMKLR1,TGFBR1,FPR3,IRS2,PTGS2,TREM2,HMOX1,CD40
GO:BP	positive regulation of response to external stimulus	GO:0032103	FALSE	1.4796757666948347e-11	10.829833438768503	654	433	43	26944	CAMK1D,TRAF3,PTPRJ,CD86,LRRK2,SASH1,IRAK2,APP,RBM47,RFTN1,PLA2G7,JAK2,NRG1,LYN,SRC,AP3B1,VEGFA,ESR1,CTSS,CLEC4E,BRAF,MIF,OASL1,MET,C3,NFKBIZ,TNIP1,H2-M2,PIK3R1,CMKLR1,NLRP3,FPR3,NOD2,RIPK2,TRAF6,PTGS2,TREM2,CD40,CD14,ACOD1,ZC3HAV1,RSAD2,CLEC4N
GO:BP	response to wounding	GO:0009611	FALSE	1.5036613374492726e-11	10.822849966828652	541	433	39	26944	GNAQ,EXT1,PTPRJ,ARHGAP24,RREB1,PLEK,SLC1A2,NFE2L2,PLA2G4A,PDPN,SLC7A11,HIF1A,JAK2,NRG1,IL1A,LYN,MRTFA,F13A1,AP3B1,VEGFA,SOD2,MAP2K4,ENTPD1,PTEN,TEC,BRAF,PPARD,BNIP3,PROCR,NFKBIZ,SDC4,F10,DST,PAPSS2,TREM2,HMOX1,SLC11A1,APOE,MERTK
GO:BP	regulation of macromolecule metabolic process	GO:0060255	FALSE	1.985905173756269e-11	10.702041492747789	6358	433	174	26944	CAMK1D,TRPS1,MITF,CDK8,ETV6,PID1,IL31RA,FBXL5,NOS2,PHLPP1,TRAF3,PTPRJ,AFF1,FNIP2,ZEB2,MAML2,RAPGEF2,RERE,SMYD3,SND1,RREB1,HEXB,CD86,HDAC9,CREB5,SLCO3A1,LRRK2,ARID1B,TANK,ZFP407,SASH1,ELL2,ARG2,NFE2L2,TACO1,APP,RBM47,WWOX,JARID2,RFTN1,AMBRA1,FNIP1,BCAS3,RABGEF1,APBA1,RFFL,HIF1A,CD38,RNF217,NEDD4L,JAK2,MALT1,CPEB4,ZCCHC7,NRG1,IL1A,DYRK1A,DAPK1,CBLB,FAM172A,CDYL2,LYN,MRTFA,BABAM2,RYBP,IFRD1,PDE4B,SR…
GO:BP	cellular component organization or biogenesis	GO:0071840	FALSE	2.0476658174377922e-11	10.688740919515103	7815	433	201	26944	CAMK1D,FMNL2,MITF,OSBPL8,GPHN,ABCA1,ETV6,EXT1,MYO1E,AKT3,PTPRJ,FNIP2,EXOC4,ARHGAP24,ABI1,ZEB2,TBC1D5,MAN2A1,RAPGEF2,RERE,TNS3,ARHGAP10,LRRC8C,SMYD3,RREB1,HEXB,HDAC9,RAB8B,PLEK,ATG10,LRRK2,ARID1B,SLC1A2,VAV3,HTR7,SIK3,NFE2L2,BTBD9,TACO1,APP,PLA2G4A,DIAPH2,JARID2,RFTN1,PLA2G7,ASAP1,PDPN,VTI1A,AMBRA1,MCTP1,FNIP1,BCAS3,SLC7A11,LRRC8D,RABGEF1,UVRAG,PSTPIP2,HIF1A,MPP7,LARGE1,CD38,NEDD4L,JAK2,ATP8B4,P4H…
GO:BP	catabolic process	GO:0009056	FALSE	2.21131799111098e-11	10.655348800680134	2495	433	93	26944	FBXL5,NOS2,EXT1,ACSL1,FBXL17,TBC1D5,PDE7B,AOAH,RNF149,SND1,HEXB,ATG10,LRRK2,ARG2,NFE2L2,APP,PLA2G4A,RBM47,PLA2G7,VTI1A,AMBRA1,BCAS3,UVRAG,RFFL,HIF1A,RNF217,NEDD4L,MALT1,CPQ,ZCCHC7,NRG1,DAPK1,CBLB,RYBP,PDE4B,ERN1,SGPL1,FBXO11,VEGFA,INHBA,ARIH1,MYO5A,GPD2,FOXO3,CTSS,DRAM1,PRDX6,SMOX,ACVR2A,ENTPD1,PTEN,PPARD,PRDX5,BNIP3,PDE8A,APOBEC1,RIC1,PSAP,GCLC,MDM2,AIG1,ZHX2,GLS,HK2,PLD1,SPSB1,STK38L,BCL2L11,WA…
GO:BP	lymphocyte activation	GO:0046649	FALSE	2.5658387311296487e-11	10.59077064351116	848	433	49	26944	PTPRJ,PLCL2,CD86,ARID1B,VAV3,ARG2,ST3GAL1,CLEC4D,AMBRA1,FNIP1,CD38,TPD52,JAK2,MALT1,IL1A,CBLB,LYN,AP3B1,BCL6,CD274,FOXO3,HSPH1,SH3KBP1,ATP11C,CLEC4E,PTEN,BRAF,MIF,GPNMB,ZFP609,ITGAV,PSAP,NFKBIZ,PAG1,H2-M2,PIK3R1,SDC4,NLRP3,PTPN2,CFB,NOD2,RIPK2,TRAF6,IRS2,SLC11A1,CD40,MAFB,MERTK,RSAD2
GO:BP	immune response-activating cell surface receptor signaling pathway	GO:0002429	FALSE	2.693779159132119e-11	10.569638011397602	276	433	28	26944	PTPRJ,PLCL2,VAV3,IRAK2,RFTN1,RABGEF1,CD38,MALT1,CBLB,LYN,PDE4B,PTEN,TEC,BRAF,C3,NFKBIZ,SH2B2,PIK3R1,CMKLR1,PTPN2,FPR3,NOD2,RIPK2,TRAF6,TREM2,NFKB1,CD14,CLEC4N
GO:BP	import into cell	GO:0098657	FALSE	3.037043382558598e-11	10.517549004370427	916	433	51	26944	SLC8A1,CAMK1D,ABCA1,DENND1A,MYO1E,ACSL1,PTPRJ,SLC7A2,TBC1D5,CACNA1D,LRRC8C,LRRK2,SLC1A2,ARG2,BTBD9,APP,MCTP1,SLC7A11,RABGEF1,NEDD4L,NRG1,ELMO1,SDC1,CARMIL1,SLC2A1,SRC,VEGFA,RHOQ,SH3KBP1,PTEN,DOCK1,SLC22A4,IQSEC1,ITGAV,LMBRD1,C3,SLC7A8,TRPM2,FPR3,NOD2,OLR1,LRP12,IRS2,TREM2,SLC11A1,STRA6L,CD14,APOE,MERTK,CD63,CREG1
GO:BP	regulation of cytokine production	GO:0001817	FALSE	3.621439281600675e-11	10.441118791945204	824	433	48	26944	NOS2,TRAF3,PTPRJ,HDAC9,LRRK2,TANK,ARG2,APP,RBM47,RFTN1,RABGEF1,HIF1A,JAK2,MALT1,IL1A,LYN,PDE4B,SRC,BCL6,CD274,SRGN,CLEC4E,PTEN,MIF,GPNMB,ITGAV,C3,H2-M2,RGCC,PIK3R1,CMKLR1,NLRP3,CYBB,RNF128,NOD2,RIPK2,TRAF6,PTGS2,TREM2,HMOX1,SLC11A1,NFKB1,CD40,CD14,ZC3HAV1,MERTK,RSAD2,CLEC4N
GO:BP	animal organ development	GO:0048513	FALSE	3.723140182003469e-11	10.429090611612809	3260	433	110	26944	SLC8A1,MITF,LDLRAD4,GNAQ,EXT1,MYO1E,AKT3,FBXL17,PTPRJ,EXOC4,ZEB2,MAN2A1,RAPGEF2,RERE,TNS3,RREB1,LRRK2,SLC1A2,ARG2,SIK3,APP,PLA2G4A,WWOX,JARID2,SGMS2,PDPN,SLC7A11,HIF1A,LARGE1,CLIC4,JAK2,VPS13B,NRG1,IL1A,SDC1,FAM172A,MRTFA,SLC2A1,SRC,FNDC3A,SPATA5,SGPL1,AP3B1,SRGAP2,VEGFA,INHBA,NRP2,PDLIM5,FOXP4,MYO5A,ESR1,GPD2,FOXO3,STK3,SOD2,SRGN,ZFP516,RFX3,TNFAIP6,FMN1,ACVR2A,MAP2K4,PTEN,BRAF,CHST11,FAM20C,NCO…
GO:BP	macromolecule localization	GO:0033036	FALSE	4.7021961595405035e-11	10.327699257552839	3092	433	106	26944	OSBPL8,GPHN,ABCA1,PID1,KPNA1,GNAQ,NOS2,DENND1A,ACSL1,EXOC4,TBC1D5,RAPGEF2,CACNA1D,SMYD3,HEXB,RAB8B,SLCO3A1,PLEK,LRRK2,SIK3,MAN1A,APP,PLA2G4A,OSBPL3,DIAPH2,JARID2,RFTN1,ASAP1,VTI1A,SLC7A11,RABGEF1,APBA1,RFFL,HIF1A,MPP7,LARGE1,CD38,NEDD4L,JAK2,ATP8B4,VPS13B,EPB41L2,NRG1,IL1A,SLC2A1,MAP4K4,SRC,AP3B1,VEGFA,INHBA,BCL6,MYO5A,RHOQ,ESR1,MDFIC,SH3KBP1,STK3,SRGN,KPNA4,RFX3,TNFAIP6,ATP11C,NUP98,EXOC6B,TNKS,…
GO:BP	cytokine production	GO:0001816	FALSE	4.752820511709427e-11	10.323048586346106	830	433	48	26944	NOS2,TRAF3,PTPRJ,HDAC9,LRRK2,TANK,ARG2,APP,RBM47,RFTN1,RABGEF1,HIF1A,JAK2,MALT1,IL1A,LYN,PDE4B,SRC,BCL6,CD274,SRGN,CLEC4E,PTEN,MIF,GPNMB,ITGAV,C3,H2-M2,RGCC,PIK3R1,CMKLR1,NLRP3,CYBB,RNF128,NOD2,RIPK2,TRAF6,PTGS2,TREM2,HMOX1,SLC11A1,NFKB1,CD40,CD14,ZC3HAV1,MERTK,RSAD2,CLEC4N
GO:BP	wound healing	GO:0042060	FALSE	5.172028722978729e-11	10.286339071920699	377	433	32	26944	GNAQ,EXT1,PTPRJ,ARHGAP24,RREB1,PLEK,NFE2L2,PLA2G4A,PDPN,SLC7A11,HIF1A,JAK2,NRG1,IL1A,LYN,MRTFA,F13A1,AP3B1,VEGFA,ENTPD1,PTEN,TEC,PPARD,PROCR,SDC4,F10,DST,PAPSS2,HMOX1,SLC11A1,APOE,MERTK
GO:BP	regulation of cell population proliferation	GO:0042127	FALSE	5.72141619869932e-11	10.242496458767457	1799	433	75	26944	MITF,PID1,IL31RA,GNAQ,NOS2,AKT3,PTPRJ,FNIP2,RAPGEF2,TNS3,RREB1,CD86,LRRK2,VAV3,ARG2,APP,PLA2G4A,JARID2,PDPN,AMBRA1,FNIP1,SLC7A11,HIF1A,CD38,TPD52,JAK2,NRG1,IL1A,CBLB,LYN,SRC,ERN1,FTH1,VEGFA,INHBA,BCL6,CD274,ESR1,FOXO3,STK3,SOD2,PTEN,BRAF,CHST11,PPARD,ITPR1,MIF,APOBEC1,GPNMB,ZFP609,ITGAV,MDM2,FRS2,H2-M2,RGCC,JAG1,PIK3R1,ATXN1,SDC4,TGFBR1,PTPN2,DISC1,EGLN3,NOD2,HTRA1,RIPK2,TRAF6,IRS2,PTGS2,TREM2,HM…
GO:BP	response to chemical	GO:0042221	FALSE	7.210493789804683e-11	10.142034992861122	5561	433	157	26944	CAMK1D,OSBPL8,GPHN,ABCA1,PID1,IL31RA,GNAQ,NOS2,TRAF3,EXT1,AKT3,ACSL1,ABTB2,PTPRJ,LRCH1,RAPGEF2,CACNA1D,LRRC8C,RNF149,SMYD3,CD86,HDAC9,LRRK2,ARID1B,TANK,SASH1,SLC1A2,VAV3,HTR7,PARP8,NFE2L2,IRAK2,APP,PLA2G4A,RBM47,JARID2,SAA3,RFTN1,PLA2G7,LY6I,BCAS3,SLC7A11,LRRC8D,RABGEF1,RFFL,HIF1A,LARGE1,CD38,CLIC4,JAK2,MALT1,CPEB4,SLC23A2,NRG1,IL1A,DAPK1,SDC1,LYN,SLC2A1,MAP4K4,PDE4B,SRC,MBD5,ERN1,RSRC1,VEGFA,INH…
GO:BP	cell-cell signaling	GO:0007267	FALSE	8.294945495450998e-11	10.081186463298769	1734	433	73	26944	MITF,ABCA1,KPNA1,GNAQ,NOS2,EXT1,EXOC4,ABI1,ZEB2,RAPGEF2,CACNA1D,PLCL2,RAB8B,LRRK2,HTR7,BTBD9,APP,PLA2G4A,WWOX,LY6I,MCTP1,BCAS3,SLC7A11,APBA1,HIF1A,LARGE1,CD38,CYTH1,JAK2,NRG1,IL1A,SDC1,LYN,MAP4K4,SRC,INHBA,MYO5A,MDFIC,FOXO3,NXN,STK3,SRGN,KPNA4,RFX3,TNKS,ACVR2A,ENTPD1,PTEN,SIPA1L1,BRAF,PPARD,ACSL4,ITPR1,MIF,SLC16A10,LY6C2,FABP5,NTNG2,IQSEC1,GPNMB,ITGAV,TRPM2,GLS,ATXN1,DISC1,HOMER1,TMEM170B,IRS2,PT…
GO:BP	positive regulation of transport	GO:0051050	FALSE	8.994483196298806e-11	10.046023785230448	975	433	52	26944	CAMK1D,OSBPL8,ABCA1,GNAQ,AKT3,ACSL1,PTPRJ,TBC1D5,CACNA1D,RAB8B,LRRK2,SLC1A2,NFE2L2,APP,PLA2G4A,HIF1A,CD38,NEDD4L,JAK2,IL1A,SDC1,SRC,VEGFA,RHOQ,CTSS,ACVR2A,BRAF,PPARD,ACSL4,ITPR1,EXOC2,MIF,ADAM9,C3,MDM2,TRPM2,RGCC,PIK3R1,SDC4,FPR3,HOMER1,NOD2,ITGAM,IRS2,PTGS2,TREM2,PTGES,SLC11A1,CD14,APOE,MERTK,CD63
GO:BP	secretion by cell	GO:0032940	FALSE	1.0646265150027397e-10	9.972802721728941	913	433	50	26944	ABCA1,GNAQ,NOS2,EXOC4,CACNA1D,RAB8B,PLEK,LRRK2,HTR7,PLA2G4A,MCTP1,RABGEF1,APBA1,HIF1A,CD38,JAK2,NRG1,IL1A,SDC1,LYN,MAP4K4,INHBA,MYO5A,KPNA4,RFX3,EXOC6B,ACVR2A,ENTPD1,BRAF,PPARD,ACSL4,ITPR1,EXOC2,MIF,SLC16A10,RIC1,ADAM9,PSAP,TRPM2,RGCC,SDC4,ITGAM,IRS2,PTGS2,TREM2,HMOX1,PTGES,APOE,MERTK,RSAD2
GO:BP	regulation of protein metabolic process	GO:0051246	FALSE	1.0901258985871059e-10	9.962523342514228	1901	433	77	26944	PID1,IL31RA,FBXL5,NOS2,PHLPP1,TRAF3,PTPRJ,FNIP2,RAPGEF2,SMYD3,CD86,SLCO3A1,LRRK2,TANK,SASH1,TACO1,APP,AMBRA1,FNIP1,RABGEF1,RFFL,HIF1A,RNF217,NEDD4L,JAK2,CPEB4,NRG1,DYRK1A,DAPK1,CBLB,LYN,RYBP,SRC,ERN1,MOB3B,FBXO11,VEGFA,INHBA,ARIH1,FOXO3,NXN,CPEB2,ACVR2A,MAP2K4,HDAC8,PTEN,BRAF,CDYL,MIF,RIC1,GPNMB,ITGAV,C3,GCLC,MDM2,TNIP1,PIK3R1,PLD1,NLRP3,TGFBR1,PTPN2,WAC,FPR3,DISC1,RNF19B,NOD2,RIPK2,CST7,PTGS2,TR…
GO:BP	positive regulation of developmental process	GO:0051094	FALSE	1.2215794029517066e-10	9.913078298528443	1480	433	66	26944	SLC8A1,AKT3,ZEB2,MAN2A1,RAPGEF2,RREB1,ARID1B,SASH1,NFE2L2,APP,PDPN,AMBRA1,HIF1A,NEDD4L,JAK2,MALT1,SLC23A2,NRG1,IL1A,LYN,B4GALT5,SRC,AP3B1,VEGFA,INHBA,BCL6,FOXO3,STK3,SOD2,RFX3,ATP11C,ACVR2A,SUCO,PTEN,BRAF,JAK1,FAM20C,NCOA2,TCF12,PPARD,BNIP3,DDHD1,ADAM9,ZFP609,C3,MDM2,NFKBIZ,FRS2,RGCC,JAG1,PIK3R1,ATXN1,HK2,CMKLR1,NLRP3,TGFBR1,DISC1,CYBB,RIPK2,DCSTAMP,TRAF6,PTGS2,TREM2,HMOX1,CD40,APOE
GO:BP	positive regulation of cell activation	GO:0050867	FALSE	1.234213008108552e-10	9.908609880608399	389	433	32	26944	PTPRJ,CD86,PLEK,LRRK2,ARID1B,VAV3,PLA2G4A,CLEC4D,PDPN,AMBRA1,CD38,JAK2,MALT1,IL1A,AP3B1,BCL6,CD274,FOXO3,HSPH1,SH3KBP1,ATP11C,MIF,ZFP609,NFKBIZ,H2-M2,NLRP3,NOD2,RIPK2,TRAF6,IRS2,TREM2,CD40
GO:BP	regulation of biosynthetic process	GO:0009889	FALSE	1.4030010430187737e-10	9.852942006108398	5706	433	159	26944	CAMK1D,TRPS1,MITF,CDK8,ETV6,PID1,NOS2,TRAF3,PTPRJ,AFF1,FNIP2,ZEB2,MAML2,RAPGEF2,RERE,SMYD3,SND1,RREB1,HEXB,CD86,HDAC9,CREB5,PLEK,LRRK2,ARID1B,TANK,ZFP407,ELL2,ARG2,NFE2L2,TACO1,APP,PLA2G4A,RBM47,WWOX,JARID2,RFTN1,AMBRA1,FNIP1,BCAS3,SLC7A11,RABGEF1,APBA1,HIF1A,CD38,JAK2,MALT1,CPEB4,ZCCHC7,NRG1,IL1A,DYRK1A,DAPK1,FAM172A,CDYL2,LYN,MRTFA,RYBP,IFRD1,PDE4B,SRC,ERN1,AP3B1,VEGFA,INHBA,BCL6,FOXP4,CD274,RH…
GO:BP	response to organonitrogen compound	GO:0010243	FALSE	1.577520423371463e-10	9.802025009453013	1161	433	57	26944	OSBPL8,PID1,GNAQ,EXT1,AKT3,PTPRJ,RAPGEF2,HDAC9,LRRK2,ARID1B,SLC1A2,HTR7,NFE2L2,APP,JAK2,CPEB4,IL1A,SDC1,LYN,SLC2A1,SRC,MBD5,ERN1,INHBA,MYO5A,RHOQ,FOXO3,CPEB2,HDAC8,PTEN,BRAF,NCOA2,TCF12,ITPR1,GCLC,MDM2,NFKBIZ,SH2B2,TRPM2,JAG1,PIK3R1,NLRP3,PTPN2,FPR3,MGST1,CYBB,HOMER1,BCKDHB,KYNU,NOD2,RIPK2,IRS2,PTGS2,TREM2,NFKB1,DENND4C,APOE
GO:BP	regulation of cellular biosynthetic process	GO:0031326	FALSE	1.5970928981136966e-10	9.796669821516648	5663	433	158	26944	CAMK1D,TRPS1,MITF,CDK8,ETV6,PID1,NOS2,TRAF3,PTPRJ,AFF1,FNIP2,ZEB2,MAML2,RAPGEF2,RERE,SMYD3,SND1,RREB1,HEXB,CD86,HDAC9,CREB5,PLEK,LRRK2,ARID1B,TANK,ZFP407,ELL2,ARG2,NFE2L2,TACO1,APP,PLA2G4A,RBM47,WWOX,JARID2,RFTN1,AMBRA1,FNIP1,BCAS3,SLC7A11,RABGEF1,APBA1,HIF1A,CD38,JAK2,MALT1,CPEB4,ZCCHC7,NRG1,IL1A,DYRK1A,DAPK1,FAM172A,CDYL2,LYN,MRTFA,RYBP,IFRD1,PDE4B,SRC,ERN1,AP3B1,VEGFA,INHBA,BCL6,FOXP4,CD274,RH…
GO:BP	tissue development	GO:0009888	FALSE	1.7969565424323962e-10	9.745462425734667	2122	433	82	26944	SLC8A1,LDLRAD4,IL31RA,EXT1,MYO1E,FBXL17,EXOC4,ARHGAP24,ABI1,ZEB2,RAPGEF2,RREB1,ARG2,SIK3,PLA2G4A,JARID2,SGMS2,PDPN,AMBRA1,SLC7A11,HIF1A,LARGE1,CLIC4,JAK2,VPS13B,NRG1,IL1A,SDC1,FAM172A,MRTFA,IFRD1,SRC,FNDC3A,AP3B1,VEGFA,INHBA,NRP2,PDLIM5,FOXP4,MYO5A,ESR1,STK3,SRGN,ZFP516,RFX3,FMN1,ACVR2A,MAP2K4,PTEN,SPECC1L,CHST11,FAM20C,NCOA2,PPARD,MTHFD1L,MET,NTNG2,ASTN2,ADAM9,GPNMB,ITGAV,C3,PSAP,MDM2,NFKBIZ,FRS…
GO:BP	regulation of response to biotic stimulus	GO:0002831	FALSE	1.8216614626193712e-10	9.739532329106723	556	433	38	26944	TRAF3,CD86,SASH1,ARG2,NFE2L2,IRAK2,APP,RBM47,RFTN1,DAPK1,LYN,SRC,AP3B1,CD274,ESR1,CLEC4E,PTEN,MIF,OASL1,NFKBIZ,TNIP1,H2-M2,PIK3R1,NLRP3,PTPN2,FPR3,NOD2,HTRA1,RIPK2,TRAF6,TREM2,CD40,CD14,APOE,ACOD1,ZC3HAV1,RSAD2,CLEC4N
GO:BP	positive regulation of cell adhesion	GO:0045785	FALSE	2.2871591052760481e-10	9.640703622826583	504	433	36	26944	PTPRJ,RREB1,CD86,ARID1B,VAV3,PDPN,AMBRA1,JAK2,MALT1,NRG1,IL1A,CARMIL1,SRC,AP3B1,VEGFA,BCL6,CD274,FOXO3,HSPH1,FMN1,BRAF,JAK1,DOCK1,NFAT5,ADAM9,ZFP609,ITGAV,NFKBIZ,H2-M2,SDC4,NLRP3,DISC1,RIPK2,TRAF6,ADAM19,CD63
GO:BP	negative regulation of programmed cell death	GO:0043069	FALSE	2.488548133811706e-10	9.604053954660102	1069	433	54	26944	CAMK1D,MITF,GNAQ,ARHGAP10,LRRK2,ARG2,NFE2L2,ST3GAL1,PDPN,AMBRA1,SLC7A11,RFFL,HIF1A,CD38,JAK2,CPEB4,NRG1,DAPK1,CBLB,MRTFA,BABAM2,SRC,GBE1,VEGFA,BCL6,ESR1,HSPH1,SOD2,MAP2K4,PTEN,BRAF,CHST11,GRINA,PPARD,PRDX5,BNIP3,ITPR1,MIF,MET,ITGAV,ARF4,GCLC,MDM2,PIK3R1,TGFBR1,NOD2,IRS2,PTGS2,TREM2,HMOX1,NFKB1,APOE,IER3,MERTK
GO:BP	cell-cell adhesion	GO:0098609	FALSE	2.529262516817526e-10	9.59701	934	433	50	26944	EXT1,LPP,CD86,PLEK,ARID1B,ARG2,PDPN,AMBRA1,SLC7A11,JAK2,MALT1,NRG1,IL1A,ALCAM,CBLB,LYN,SRC,FNDC3A,AP3B1,VEGFA,BCL6,CD274,FOXO3,HSPH1,PCDH7,PTEN,SPECC1L,JAK1,NFAT5,NTNG2,ASTN2,ADAM9,GPNMB,ZFP609,ITGAV,NFKBIZ,TNIP1,PAG1,H2-M2,RGCC,JAG1,PIK3R1,SDC4,NLRP3,PTPN2,RIPK2,OLR1,ITGAM,TRAF6,ADAM19
GO:BP	export from cell	GO:0140352	FALSE	4.4926761607746366e-10	9.347494884914054	982	433	51	26944	ABCA1,GNAQ,NOS2,EXOC4,CACNA1D,RAB8B,PLEK,LRRK2,HTR7,PLA2G4A,MCTP1,RABGEF1,APBA1,HIF1A,CD38,JAK2,NRG1,IL1A,SDC1,LYN,MAP4K4,INHBA,MYO5A,KPNA4,RFX3,EXOC6B,ACVR2A,ENTPD1,BRAF,PPARD,ACSL4,ITPR1,EXOC2,MIF,SLC16A10,RIC1,ADAM9,PSAP,TRPM2,RGCC,SDC4,ABCC5,ITGAM,IRS2,PTGS2,TREM2,HMOX1,PTGES,APOE,MERTK,RSAD2
GO:BP	response to abiotic stimulus	GO:0009628	FALSE	4.66880766289284e-10	9.330794016980494	1300	433	60	26944	SLC8A1,NOS2,EXT1,FBXL17,ZEB2,LRRC8C,TANK,SLC1A2,HTR7,NFE2L2,APP,PDPN,SLC7A11,LRRC8D,HIF1A,LARGE1,CD38,NEDD4L,CPEB4,NRG1,IL1A,LYN,BABAM2,SLC2A1,SRC,VEGFA,INHBA,FOXO3,SOD2,ZFP516,MAP4K3,CPEB2,CTSS,ACVR2A,MAP2K4,PTEN,BRAF,PPARD,NFAT5,BNIP3,ITPR1,APOBEC1,GCLC,MDM2,TRPM2,RGCC,PIK3R1,ATXN1,HK2,NLRP3,DISC1,EGLN3,CYBB,ITGAM,PTGS2,TREM2,HMOX1,NFKB1,CD40,CD14
GO:BP	cellular response to stress	GO:0033554	FALSE	5.153029120318567e-10	9.287937403287435	1799	433	73	26944	AKT3,FNIP2,LRRC8C,ATG10,LRRK2,ARID1B,TANK,VAV3,ARG2,PARP8,NFE2L2,APP,DIAPH2,AMBRA1,FNIP1,SLC7A11,LRRC8D,UVRAG,HIF1A,JAK2,CPEB4,NRG1,IL1A,DYRK1A,DAPK1,LYN,BABAM2,SLC2A1,MAP4K4,SRC,ERN1,VEGFA,INHBA,BCL6,FOXO3,NSMCE2,SOD2,CPEB2,MAP2K4,PTEN,BRAF,GRINA,IMMP2L,PPARD,NFAT5,PRDX5,BNIP3,ITPR1,MIF,MET,SUPT3,PSAP,MDM2,TRPM2,RGCC,PIK3R1,HK2,NLRP3,PTPN2,BCL2L11,WAC,MGST1,CYBB,NOD2,RIPK2,GCH1,TRAF6,PTGS2,TREM2…
GO:BP	chemical homeostasis	GO:0048878	FALSE	5.602883850980978e-10	9.251588380459593	1091	433	54	26944	SLC8A1,ABCA1,FBXL5,EXT1,PTPRJ,CACNA1D,HEXB,HDAC9,LRRK2,BTBD9,APP,PLA2G4A,SLC7A11,LRRC8D,HIF1A,CLIC4,IL1A,LYN,MAP4K4,MBD5,ERN1,AP3B1,FTH1,VEGFA,MYO5A,FOXO3,SOD2,GRINA,PPARD,NFAT5,BNIP3,ITPR1,MED13,FABP5,ITGAV,GRAMD1B,GCLC,SH2B2,TRPM2,TLCD2,GLS,PIK3R1,HK2,PTPN2,DISC1,IRS2,TREM2,HMOX1,TBXAS1,SLC11A1,CD40,APOE,FTL1,CREG1
GO:BP	cellular response to nitrogen compound	GO:1901699	FALSE	5.8294795938145e-10	9.234370213615344	823	433	46	26944	OSBPL8,PID1,GNAQ,AKT3,PTPRJ,RAPGEF2,HDAC9,LRRK2,ARID1B,SLC1A2,HTR7,NFE2L2,APP,LY6I,LARGE1,JAK2,CPEB4,SRC,MBD5,INHBA,MYO5A,RHOQ,FOXO3,CPEB2,HDAC8,PTEN,NCOA2,ITPR1,LY6C2,GCLC,MDM2,SH2B2,TRPM2,PIK3R1,NLRP3,PTPN2,FPR3,CYBB,NOD2,RIPK2,IRS2,PTGS2,TREM2,NFKB1,DENND4C,ZC3HAV1
GO:BP	regulation of cell-cell adhesion	GO:0022407	FALSE	8.18790629377242e-10	9.08683	498	433	35	26944	CD86,ARID1B,ARG2,PDPN,AMBRA1,JAK2,MALT1,IL1A,CBLB,LYN,SRC,AP3B1,VEGFA,BCL6,CD274,FOXO3,HSPH1,PTEN,SPECC1L,JAK1,NFAT5,GPNMB,ZFP609,NFKBIZ,PAG1,H2-M2,RGCC,JAG1,PIK3R1,SDC4,NLRP3,PTPN2,RIPK2,TRAF6,ADAM19
GO:BP	response to biotic stimulus	GO:0009607	FALSE	8.854048702282343e-10	9.052858093484987	1819	433	73	26944	ABCA1,IL31RA,NOS2,TRAF3,EXT1,CD86,ATG10,SASH1,ARG2,NFE2L2,IRAK2,APP,RBM47,SAA3,RFTN1,CLEC4D,HIF1A,JAK2,MALT1,IL1A,DAPK1,LYN,PDE4B,SRC,AP3B1,CD274,ESR1,SOD2,CLEC4E,PTEN,JAK1,PPARD,BNIP3,MIF,APOBEC1,OASL1,ADAM9,ITGAV,C3,NFKBIZ,TNIP1,H2-M2,PIK3R1,LYST,NLRP3,PTPN2,BCL2L11,FPR3,RNF19B,CFB,MGST1,CYBB,KYNU,NOD2,HTRA1,RIPK2,ITGAM,GCH1,TRAF6,PTGS2,TREM2,UBD,SLC11A1,NFKB1,CD40,CD14,APOE,IER3,AA467197,ACOD1…
GO:BP	negative regulation of apoptotic process	GO:0043066	FALSE	1.0640616974090706e-9	8.973033189646731	1039	433	52	26944	CAMK1D,MITF,GNAQ,ARHGAP10,LRRK2,ARG2,NFE2L2,ST3GAL1,PDPN,AMBRA1,RFFL,HIF1A,CD38,JAK2,CPEB4,NRG1,DAPK1,CBLB,MRTFA,BABAM2,SRC,GBE1,VEGFA,BCL6,ESR1,HSPH1,SOD2,MAP2K4,PTEN,BRAF,CHST11,GRINA,PPARD,PRDX5,BNIP3,ITPR1,MIF,ITGAV,ARF4,GCLC,MDM2,PIK3R1,TGFBR1,NOD2,IRS2,PTGS2,TREM2,HMOX1,NFKB1,APOE,IER3,MERTK
GO:BP	regulation of lymphocyte activation	GO:0051249	FALSE	1.5384972396135635e-9	8.8129	509	433	35	26944	CD86,ARID1B,VAV3,ARG2,AMBRA1,CD38,JAK2,MALT1,IL1A,CBLB,LYN,AP3B1,BCL6,CD274,FOXO3,HSPH1,SH3KBP1,ATP11C,PTEN,BRAF,MIF,GPNMB,ZFP609,NFKBIZ,PAG1,H2-M2,SDC4,NLRP3,PTPN2,NOD2,RIPK2,TRAF6,IRS2,CD40,MERTK
GO:BP	response to peptide	GO:1901652	FALSE	1.6750229373269308e-9	8.77598	568	433	37	26944	OSBPL8,PID1,AKT3,PTPRJ,HDAC9,ARID1B,NFE2L2,APP,JAK2,LYN,SLC2A1,SRC,MBD5,INHBA,MYO5A,RHOQ,FOXO3,CPEB2,PTEN,BRAF,NCOA2,TCF12,GCLC,MDM2,SH2B2,JAG1,PIK3R1,PTPN2,FPR3,CYBB,NOD2,RIPK2,IRS2,PTGS2,TREM2,NFKB1,DENND4C
GO:BP	apoptotic signaling pathway	GO:0097190	FALSE	2.2135341300797265e-9	8.654913777325966	633	433	39	26944	FNIP2,LRRK2,NFE2L2,APP,WWOX,RFFL,HIF1A,JAK2,NRG1,IL1A,DAPK1,MRTFA,SRC,ERN1,SGPL1,INHBA,FOXO3,STK3,SOD2,CTSS,MAP2K4,PTEN,GRINA,PPARD,BNIP3,ITPR1,MIF,ITGAV,GCLC,MDM2,NFKBIZ,PIK3R1,TGFBR1,PTPN2,BCL2L11,PTGS2,TREM2,HMOX1,IER3
GO:BP	response to other organism	GO:0051707	FALSE	2.4974672353521286e-9	8.602500200639161	1778	433	71	26944	ABCA1,IL31RA,NOS2,TRAF3,EXT1,CD86,SASH1,ARG2,NFE2L2,IRAK2,APP,RBM47,SAA3,RFTN1,CLEC4D,HIF1A,JAK2,MALT1,IL1A,DAPK1,LYN,PDE4B,SRC,AP3B1,CD274,ESR1,SOD2,CLEC4E,PTEN,JAK1,PPARD,BNIP3,MIF,APOBEC1,OASL1,ADAM9,ITGAV,C3,NFKBIZ,TNIP1,H2-M2,PIK3R1,LYST,NLRP3,PTPN2,FPR3,RNF19B,CFB,MGST1,CYBB,KYNU,NOD2,HTRA1,RIPK2,ITGAM,GCH1,TRAF6,PTGS2,TREM2,UBD,SLC11A1,NFKB1,CD40,CD14,APOE,IER3,AA467197,ACOD1,ZC3HAV1,RSAD2…
GO:BP	biological process involved in interspecies interaction between organisms	GO:0044419	FALSE	2.5311478734556844e-9	8.59668	1940	433	75	26944	ABCA1,IL31RA,NOS2,TRAF3,EXT1,CD86,SASH1,ARG2,NFE2L2,IRAK2,APP,RBM47,SAA3,RFTN1,CLEC4D,UVRAG,HIF1A,JAK2,MALT1,IL1A,DAPK1,LYN,PDE4B,SRC,AP3B1,CD274,ESR1,SOD2,CLEC4E,PTEN,JAK1,PPARD,BNIP3,EXOC2,MIF,APOBEC1,OASL1,ADAM9,ITGAV,C3,NFKBIZ,TNIP1,H2-M2,PIK3R1,LYST,NLRP3,PTPN2,BCL2L11,FPR3,RNF19B,CFB,MGST1,CYBB,KYNU,NOD2,HTRA1,RIPK2,ITGAM,GCH1,TRAF6,PTGS2,TREM2,UBD,SLC11A1,NFKB1,CD40,CD14,APOE,IER3,AA467197…
GO:BP	regulation of secretion by cell	GO:1903530	FALSE	2.613628570892539e-9	8.582756131014579	667	433	40	26944	GNAQ,NOS2,CACNA1D,RAB8B,LRRK2,HTR7,PLA2G4A,MCTP1,RABGEF1,HIF1A,CD38,JAK2,NRG1,IL1A,SDC1,LYN,MAP4K4,INHBA,MYO5A,RFX3,ACVR2A,ENTPD1,BRAF,PPARD,ACSL4,ITPR1,EXOC2,MIF,RIC1,ADAM9,TRPM2,RGCC,SDC4,ITGAM,IRS2,TREM2,HMOX1,PTGES,APOE,RSAD2
GO:BP	leukocyte differentiation	GO:0002521	FALSE	2.7398482757932415e-9	8.562273486380418	668	433	40	26944	MITF,IL31RA,PTPRJ,PLCL2,ARID1B,APP,ST3GAL1,CLEC4D,AMBRA1,FNIP1,LARGE1,TPD52,MALT1,IL1A,LYN,SRC,AP3B1,VEGFA,BCL6,FOXO3,TNFAIP6,ATP11C,CLEC4E,BRAF,FAM20C,ZFP609,PSAP,NFKBIZ,TRPM2,PIK3R1,NLRP3,PTPN2,RIPK2,DCSTAMP,TRAF6,TREM2,UBD,MAFB,MERTK,RSAD2
GO:BP	response to external biotic stimulus	GO:0043207	FALSE	2.7770335252493207e-9	8.556418877274266	1782	433	71	26944	ABCA1,IL31RA,NOS2,TRAF3,EXT1,CD86,SASH1,ARG2,NFE2L2,IRAK2,APP,RBM47,SAA3,RFTN1,CLEC4D,HIF1A,JAK2,MALT1,IL1A,DAPK1,LYN,PDE4B,SRC,AP3B1,CD274,ESR1,SOD2,CLEC4E,PTEN,JAK1,PPARD,BNIP3,MIF,APOBEC1,OASL1,ADAM9,ITGAV,C3,NFKBIZ,TNIP1,H2-M2,PIK3R1,LYST,NLRP3,PTPN2,FPR3,RNF19B,CFB,MGST1,CYBB,KYNU,NOD2,HTRA1,RIPK2,ITGAM,GCH1,TRAF6,PTGS2,TREM2,UBD,SLC11A1,NFKB1,CD40,CD14,APOE,IER3,AA467197,ACOD1,ZC3HAV1,RSAD2…
GO:BP	positive regulation of cellular component organization	GO:0051130	FALSE	3.0740068057539474e-9	8.512295175320947	1248	433	57	26944	CAMK1D,ABCA1,PTPRJ,FNIP2,ZEB2,TBC1D5,RAPGEF2,RREB1,RAB8B,PLEK,LRRK2,HTR7,NFE2L2,APP,PLA2G4A,ASAP1,PDPN,AMBRA1,FNIP1,HIF1A,MPP7,NEDD4L,NRG1,IL1A,SDC1,LYN,CARMIL1,SRC,VEGFA,RHOQ,NSMCE2,FMN1,TNKS,BRAF,BNIP3,DDHD1,ITPR1,MET,ADAM9,IQSEC1,C3,RGCC,PIK3R1,SDC4,TGFBR1,BCL2L11,FPR3,DISC1,NOD2,MYO3B,DCSTAMP,TREM2,SLC11A1,CD14,APOE,MERTK,CD63
GO:BP	positive regulation of cytokine production	GO:0001819	FALSE	3.3476802564765196e-9	8.475256029017844	523	433	35	26944	NOS2,TRAF3,PTPRJ,LRRK2,TANK,APP,RBM47,RFTN1,HIF1A,JAK2,MALT1,IL1A,PDE4B,SRC,CD274,CLEC4E,PTEN,MIF,C3,H2-M2,RGCC,PIK3R1,NLRP3,CYBB,NOD2,RIPK2,TRAF6,PTGS2,TREM2,SLC11A1,CD40,CD14,ZC3HAV1,RSAD2,CLEC4N
GO:BP	regulation of macromolecule biosynthetic process	GO:0010556	FALSE	3.4247750963914597e-9	8.465367943179789	5506	433	151	26944	CAMK1D,TRPS1,MITF,CDK8,ETV6,PID1,NOS2,TRAF3,PTPRJ,AFF1,FNIP2,ZEB2,MAML2,RERE,SMYD3,SND1,RREB1,HEXB,CD86,HDAC9,CREB5,LRRK2,ARID1B,TANK,ZFP407,ELL2,ARG2,NFE2L2,TACO1,APP,RBM47,WWOX,JARID2,RFTN1,AMBRA1,FNIP1,BCAS3,RABGEF1,APBA1,HIF1A,CD38,JAK2,MALT1,CPEB4,ZCCHC7,NRG1,IL1A,DYRK1A,DAPK1,FAM172A,CDYL2,LYN,MRTFA,RYBP,IFRD1,PDE4B,SRC,ERN1,AP3B1,VEGFA,INHBA,BCL6,FOXP4,CD274,RHOQ,ESR1,MDFIC,FOXO3,HSPH1,SOD…
GO:BP	tube development	GO:0035295	FALSE	3.7229601732112436e-9	8.42911	1181	433	55	26944	EXT1,MYO1E,AKT3,PTPRJ,ARHGAP24,ZEB2,MAN2A1,RAPGEF2,TNS3,HDAC9,SASH1,VAV3,ARG2,NFE2L2,CLMP,PDPN,AMBRA1,BCAS3,SLC7A11,HIF1A,CLIC4,IL1A,SDC1,SRC,SGPL1,AP3B1,VEGFA,NRP2,FOXP4,ESR1,STK3,FMN1,PTEN,SPECC1L,JAK1,MTHFD1L,MET,ITGAV,C3,RGCC,JAG1,ATXN1,HK2,SDC4,TGFBR1,BCL2L11,ANPEP,CYBB,ARHGAP22,TRAF6,PTGS2,HMOX1,TIPARP,CD40,APOE
GO:BP	positive regulation of response to biotic stimulus	GO:0002833	FALSE	3.72672558616736e-9	8.428672584922813	414	433	31	26944	TRAF3,CD86,SASH1,IRAK2,APP,RBM47,RFTN1,LYN,SRC,AP3B1,CD274,ESR1,CLEC4E,MIF,OASL1,NFKBIZ,TNIP1,H2-M2,PIK3R1,NLRP3,FPR3,NOD2,RIPK2,TRAF6,TREM2,CD40,CD14,ACOD1,ZC3HAV1,RSAD2,CLEC4N
GO:BP	secretion	GO:0046903	FALSE	4.320028660603764e-9	8.36451	1078	433	52	26944	ABCA1,GNAQ,NOS2,EXOC4,CACNA1D,RAB8B,PLEK,LRRK2,HTR7,PLA2G4A,MCTP1,RABGEF1,APBA1,HIF1A,CD38,JAK2,NRG1,IL1A,SDC1,LYN,MAP4K4,VEGFA,INHBA,MYO5A,KPNA4,RFX3,EXOC6B,ACVR2A,ENTPD1,BRAF,PPARD,ACSL4,ITPR1,EXOC2,MIF,SLC16A10,RIC1,ADAM9,PSAP,TRPM2,RGCC,HK2,SDC4,ITGAM,IRS2,PTGS2,TREM2,HMOX1,PTGES,APOE,MERTK,RSAD2
GO:BP	response to cytokine	GO:0034097	FALSE	4.694681635817496e-9	8.328393853556696	1188	433	55	26944	ABCA1,PID1,IL31RA,NOS2,TRAF3,EXT1,ACSL1,LRCH1,LRRK2,TANK,NFE2L2,IRAK2,APP,RBM47,JARID2,SAA3,RABGEF1,RFFL,HIF1A,CD38,JAK2,IL1A,DAPK1,LYN,SRC,INHBA,NRP2,CD274,FOXO3,MAP4K3,JAK1,NFAT5,OASL1,ADAM9,GCLC,NFKBIZ,SH2B2,TEX14,PIK3R1,HK2,PTPN2,RPS6KA5,KYNU,RIPK2,DCSTAMP,GCH1,TRAF6,PTGS2,TREM2,UBD,SLC11A1,NFKB1,CD40,CD14,CCRL2
GO:BP	positive regulation of leukocyte activation	GO:0002696	FALSE	4.962294230574301e-9	8.30432	366	433	29	26944	CD86,LRRK2,ARID1B,VAV3,PLA2G4A,CLEC4D,AMBRA1,CD38,JAK2,MALT1,IL1A,AP3B1,BCL6,CD274,FOXO3,HSPH1,SH3KBP1,ATP11C,MIF,ZFP609,NFKBIZ,H2-M2,NLRP3,NOD2,RIPK2,TRAF6,IRS2,TREM2,CD40
GO:BP	regulation of gene expression	GO:0010468	FALSE	5.339542942508449e-9	8.272495916387513	5382	433	148	26944	CAMK1D,TRPS1,MITF,CDK8,ETV6,PID1,NOS2,TRAF3,PTPRJ,AFF1,FNIP2,ZEB2,MAML2,RERE,SMYD3,SND1,RREB1,HEXB,CD86,HDAC9,CREB5,LRRK2,ARID1B,TANK,ZFP407,ELL2,ARG2,NFE2L2,TACO1,APP,RBM47,WWOX,JARID2,RFTN1,AMBRA1,FNIP1,BCAS3,RABGEF1,APBA1,HIF1A,CD38,JAK2,MALT1,CPEB4,ZCCHC7,NRG1,IL1A,DYRK1A,DAPK1,FAM172A,CDYL2,LYN,MRTFA,RYBP,IFRD1,PDE4B,SRC,ERN1,AP3B1,VEGFA,INHBA,BCL6,FOXP4,CD274,RHOQ,ESR1,MDFIC,FOXO3,SOD2,SRGN…
GO:BP	cellular response to organonitrogen compound	GO:0071417	FALSE	5.659417979804887e-9	8.247228229793373	747	433	42	26944	OSBPL8,PID1,GNAQ,AKT3,PTPRJ,RAPGEF2,HDAC9,LRRK2,ARID1B,SLC1A2,HTR7,NFE2L2,APP,JAK2,CPEB4,SRC,MBD5,INHBA,MYO5A,RHOQ,FOXO3,CPEB2,HDAC8,PTEN,NCOA2,ITPR1,GCLC,MDM2,SH2B2,TRPM2,PIK3R1,NLRP3,PTPN2,FPR3,CYBB,NOD2,RIPK2,IRS2,PTGS2,TREM2,NFKB1,DENND4C
GO:BP	mononuclear cell differentiation	GO:1903131	FALSE	5.993218251940585e-9	8.222339906537194	505	433	34	26944	IL31RA,PTPRJ,PLCL2,ARID1B,ST3GAL1,CLEC4D,AMBRA1,FNIP1,TPD52,MALT1,IL1A,LYN,AP3B1,VEGFA,BCL6,FOXO3,ATP11C,CLEC4E,BRAF,ZFP609,PSAP,NFKBIZ,TRPM2,PIK3R1,NLRP3,PTPN2,RIPK2,DCSTAMP,TRAF6,TREM2,UBD,MAFB,MERTK,RSAD2
GO:BP	cellular response to peptide	GO:1901653	FALSE	7.29559049254192e-9	8.136939551299788	398	433	30	26944	OSBPL8,PID1,AKT3,PTPRJ,HDAC9,ARID1B,NFE2L2,APP,JAK2,SRC,MBD5,INHBA,MYO5A,RHOQ,FOXO3,CPEB2,PTEN,NCOA2,GCLC,MDM2,SH2B2,PIK3R1,PTPN2,FPR3,NOD2,RIPK2,IRS2,TREM2,NFKB1,DENND4C
GO:BP	positive regulation of gene expression	GO:0010628	FALSE	9.919702803741821e-9	8.003501339199495	1285	433	57	26944	MITF,PID1,NOS2,TRAF3,PTPRJ,CD86,LRRK2,TANK,NFE2L2,APP,RBM47,RFTN1,HIF1A,JAK2,MALT1,NRG1,IL1A,DYRK1A,PDE4B,SRC,ERN1,VEGFA,INHBA,CD274,NUP98,CLEC4E,PTEN,BRAF,TCF12,PPARD,NFAT5,MIF,APOBEC1,C3,MDM2,H2-M2,RGCC,JAG1,PIK3R1,PLD1,NLRP3,TGFBR1,CYBB,NOD2,RIPK2,TRAF6,PTGS2,TREM2,ADAM19,SLC11A1,NFKB1,CD40,CD14,TENT5C,ZC3HAV1,RSAD2,CLEC4N
GO:BP	cellular response to biotic stimulus	GO:0071216	FALSE	1.0952242487587193e-8	7.960496949291961	352	433	28	26944	ABCA1,NOS2,CD86,ATG10,SASH1,IRAK2,JAK2,MALT1,IL1A,LYN,PDE4B,SRC,CD274,PPARD,MIF,ADAM9,NFKBIZ,TNIP1,NLRP3,BCL2L11,NOD2,RIPK2,GCH1,TRAF6,TREM2,NFKB1,CD14,ACOD1
GO:BP	innate immune response-activating signaling pathway	GO:0002758	FALSE	1.2122499085594975e-8	7.916407839971446	256	433	24	26944	TRAF3,CD86,IRAK2,APP,RFTN1,LYN,SRC,AP3B1,ESR1,CLEC4E,OASL1,NFKBIZ,TNIP1,PIK3R1,NLRP3,NOD2,RIPK2,TRAF6,TREM2,CD40,CD14,ZC3HAV1,RSAD2,CLEC4N
GO:BP	positive regulation of programmed cell death	GO:0043068	FALSE	1.4629528118323233e-8	7.834769682002744	642	433	38	26944	CAMK1D,CERS6,NOS2,RAPGEF2,LRRK2,TMEM164,APP,PLA2G4A,WWOX,FNIP1,HIF1A,JAK2,DAPK1,LYN,RYBP,SRC,INHBA,BCL6,CD274,FOXO3,STK3,SOD2,CTSS,MAP2K4,PTEN,BNIP3,ITPR1,RGCC,TGFBR1,PTPN2,BCL2L11,TXNRD1,HTRA1,RIPK2,PTGS2,HMOX1,UBD,CD40
GO:BP	carboxylic acid transport	GO:0046942	FALSE	1.6189164602868192e-8	7.790775561235832	384	433	29	26944	NOS2,ACSL1,SLC7A2,LRRC8C,SLCO3A1,SLC1A2,ARG2,PLA2G4A,SLC7A11,LRRC8D,APBA1,SLC23A2,IL1A,SLC2A1,SLC38A6,PPARD,ACSL4,SLC22A4,MIF,SLC16A10,FABP5,SLC7A8,PSAP,ABCC5,IRS2,PTGS2,PTGES,SLC11A1,APOE
GO:BP	innate immune response	GO:0045087	FALSE	1.7543310439086643e-8	7.755888451461923	977	433	48	26944	NOS2,TRAF3,CD86,ARG2,NFE2L2,IRAK2,APP,RBM47,RFTN1,CLEC4D,JAK2,MALT1,DAPK1,LYN,SRC,AP3B1,ESR1,CLEC4E,JAK1,MIF,OASL1,C3,NFKBIZ,TNIP1,H2-M2,PIK3R1,LYST,NLRP3,PTPN2,FPR3,RNF19B,CFB,CYBB,KYNU,NOD2,RIPK2,GCH1,TRAF6,TREM2,UBD,SLC11A1,NFKB1,CD40,CD14,APOE,ZC3HAV1,RSAD2,CLEC4N
GO:BP	organic acid transport	GO:0015849	FALSE	1.8381672519498247e-8	7.735614975379586	386	433	29	26944	NOS2,ACSL1,SLC7A2,LRRC8C,SLCO3A1,SLC1A2,ARG2,PLA2G4A,SLC7A11,LRRC8D,APBA1,SLC23A2,IL1A,SLC2A1,SLC38A6,PPARD,ACSL4,SLC22A4,MIF,SLC16A10,FABP5,SLC7A8,PSAP,ABCC5,IRS2,PTGS2,PTGES,SLC11A1,APOE
GO:BP	regulation of vesicle-mediated transport	GO:0060627	FALSE	1.9755560683705815e-8	7.704310640070914	587	433	36	26944	CAMK1D,PTPRJ,TBC1D5,CACNA1D,RAB8B,LRRK2,BTBD9,APP,PLA2G4A,MCTP1,RABGEF1,NEDD4L,NRG1,SDC1,LYN,SRC,VEGFA,MYO5A,PTEN,BRAF,EXOC2,IQSEC1,ITGAV,C3,PLD1,SDC4,FPR3,NOD2,ITGAM,TREM2,HMOX1,SLC11A1,CD14,APOE,MERTK,CD63
GO:BP	cell junction organization	GO:0034330	FALSE	2.3422507707060715e-8	7.630366609475619	814	433	43	26944	GPHN,EXT1,PTPRJ,RAPGEF2,RAB8B,LRRK2,APP,ASAP1,SLC7A11,MPP7,LARGE1,NEDD4L,NRG1,SRC,SRGAP2,VEGFA,NRP2,PDLIM5,MYO5A,SRGN,FMN1,NOS1AP,PTEN,SIPA1L1,SPECC1L,NTNG2,IQSEC1,PEAK1,ITGAV,C3,ARF4,PIK3R1,SDC4,TGFBR1,STK38L,DST,DISC1,RPS6KA5,HOMER1,ARHGAP22,TREM2,PTPRO,APOE
GO:BP	neurogenesis	GO:0022008	FALSE	2.3596489606798077e-8	7.627152601173652	1907	433	72	26944	CAMK1D,CERS6,ETV6,GNAQ,EXT1,PTPRJ,EXOC4,ABI1,ZEB2,MAN2A1,RAPGEF2,RERE,HEXB,HDAC9,LRRK2,HTR7,NFE2L2,APP,DIAPH2,ASAP1,HIF1A,LARGE1,CD38,NEDD4L,JAK2,MALT1,SLC23A2,NRG1,ALCAM,LYN,MRTFA,IFRD1,B4GALT5,MAP4K4,SRGAP2,VEGFA,INHBA,BCL6,NRP2,PDLIM5,FOXO3,SOD2,ZFHX3,PTEN,SIPA1L1,BRAF,TCF12,BNIP3,ACSL4,ITPR1,NTNG2,ASTN2,IQSEC1,ZFP609,C3,ARF4,PSAP,MDM2,FRS2,ZHX2,JAG1,ATXN1,SDC4,TGFBR1,DST,DISC1,RAP1GAP2,MYO3B,…
GO:BP	positive regulation of protein metabolic process	GO:0051247	FALSE	2.5033763863670393e-8	7.60147	1130	433	52	26944	IL31RA,FBXL5,PTPRJ,FNIP2,RAPGEF2,SMYD3,CD86,SLCO3A1,LRRK2,TANK,APP,AMBRA1,FNIP1,RNF217,NEDD4L,JAK2,NRG1,DYRK1A,CBLB,LYN,SRC,ERN1,MOB3B,FBXO11,VEGFA,INHBA,ARIH1,ACVR2A,MAP2K4,PTEN,BRAF,MIF,GPNMB,C3,GCLC,MDM2,TNIP1,PIK3R1,PLD1,NLRP3,FPR3,DISC1,RNF19B,NOD2,RIPK2,PTGS2,TREM2,TIPARP,CD40,APOE,IER3,CLEC4N
GO:BP	ameboidal-type cell migration	GO:0001667	FALSE	2.5489875523299296e-8	7.59363	446	433	31	26944	AKT3,ZEB2,TNS3,RREB1,HDAC9,SASH1,NFE2L2,BCAS3,RFFL,HIF1A,SRC,SGPL1,VEGFA,NRP2,PTEN,BRAF,DOCK1,PPARD,MET,ADAM9,IQSEC1,ITGAV,RGCC,SDC4,TGFBR1,IRS2,PTGS2,HMOX1,CD40,APOE,CD63
GO:BP	epithelial cell migration	GO:0010631	FALSE	3.036468482599732e-8	7.517631222331326	316	433	26	26944	AKT3,ZEB2,TNS3,RREB1,HDAC9,SASH1,NFE2L2,BCAS3,HIF1A,SRC,VEGFA,PTEN,DOCK1,PPARD,MET,ADAM9,IQSEC1,ITGAV,RGCC,TGFBR1,IRS2,PTGS2,HMOX1,CD40,APOE,CD63
GO:BP	cellular response to lipopolysaccharide	GO:0071222	FALSE	3.036468482599732e-8	7.517631222331326	316	433	26	26944	ABCA1,NOS2,CD86,SASH1,IRAK2,JAK2,MALT1,IL1A,LYN,PDE4B,SRC,CD274,PPARD,MIF,ADAM9,NFKBIZ,TNIP1,NLRP3,NOD2,RIPK2,GCH1,TRAF6,TREM2,NFKB1,CD14,ACOD1
GO:BP	nitrogen compound transport	GO:0071705	FALSE	3.0439996105811884e-8	7.516555407460746	1959	433	73	26944	ABCA1,KPNA1,GNAQ,NOS2,DENND1A,EXOC4,SLC7A2,TBC1D5,CACNA1D,LRRC8C,RAB8B,PLEK,LRRK2,SLC1A2,HTR7,ARG2,APP,RFTN1,VTI1A,SLC7A11,LRRC8D,RABGEF1,APBA1,RFFL,HIF1A,LARGE1,CD38,JAK2,IL1A,LYN,MAP4K4,SRC,AP3B1,SLC38A6,MYO5A,MDFIC,SH3KBP1,STK3,KPNA4,RFX3,ATP11C,NUP98,EXOC6B,TNKS,ENTPD1,PPARD,ACSL4,SLC22A4,ITPR1,EXOC2,SLC16A10,APOBEC1,RIC1,ASTN2,ADAM9,ARF4,SLC7A8,PSAP,MDM2,TRPM2,PIK3R1,SCFD2,ABCC5,SNX24,MGST1,…
GO:BP	regulation of protein modification process	GO:0031399	FALSE	3.2851002638694025e-8	7.483451370889372	1102	433	51	26944	PID1,IL31RA,PHLPP1,PTPRJ,FNIP2,RAPGEF2,SMYD3,CD86,SLCO3A1,LRRK2,TANK,SASH1,APP,AMBRA1,FNIP1,RABGEF1,HIF1A,JAK2,NRG1,DYRK1A,CBLB,LYN,SRC,ERN1,MOB3B,VEGFA,INHBA,NXN,ACVR2A,MAP2K4,HDAC8,PTEN,BRAF,CDYL,MIF,GPNMB,C3,GCLC,TNIP1,PIK3R1,TGFBR1,PTPN2,FPR3,NOD2,RIPK2,PTGS2,TREM2,BST1,CD40,PTPRO,CLEC4N
GO:BP	pattern recognition receptor signaling pathway	GO:0002221	FALSE	3.295368801180514e-8	7.482095974285551	245	433	23	26944	TRAF3,CD86,IRAK2,APP,RFTN1,LYN,SRC,AP3B1,ESR1,CLEC4E,OASL1,NFKBIZ,TNIP1,PIK3R1,NLRP3,NOD2,RIPK2,TRAF6,TREM2,CD40,CD14,ZC3HAV1,RSAD2
GO:BP	transmembrane receptor protein tyrosine kinase signaling pathway	GO:0007169	FALSE	3.511524033234903e-8	7.454504354881018	599	433	36	26944	OSBPL8,PID1,EXT1,MYO1E,PTPRJ,RAPGEF2,DIAPH2,RABGEF1,HIF1A,JAK2,NRG1,CBLB,LYN,SRC,MBD5,SGPL1,VEGFA,NRP2,RHOQ,ESR1,PTEN,SIPA1L1,BRAF,FAM20C,MET,ARF4,FRS2,SH2B2,PIK3R1,ATXN1,PTPN2,IRS2,TIPARP,PTPN12,MERTK,CD63
GO:BP	tube morphogenesis	GO:0035239	FALSE	3.554523055660242e-8	7.449218664467521	927	433	46	26944	EXT1,MYO1E,AKT3,PTPRJ,ARHGAP24,ZEB2,RAPGEF2,HDAC9,SASH1,VAV3,NFE2L2,PDPN,BCAS3,HIF1A,CLIC4,IL1A,SRC,SGPL1,VEGFA,NRP2,FOXP4,ESR1,STK3,FMN1,PTEN,SPECC1L,JAK1,MTHFD1L,MET,ITGAV,C3,RGCC,JAG1,HK2,SDC4,TGFBR1,BCL2L11,ANPEP,CYBB,ARHGAP22,TRAF6,PTGS2,HMOX1,TIPARP,CD40,APOE
GO:BP	epithelium migration	GO:0090132	FALSE	3.7525526062616423e-8	7.425673210757176	319	433	26	26944	AKT3,ZEB2,TNS3,RREB1,HDAC9,SASH1,NFE2L2,BCAS3,HIF1A,SRC,VEGFA,PTEN,DOCK1,PPARD,MET,ADAM9,IQSEC1,ITGAV,RGCC,TGFBR1,IRS2,PTGS2,HMOX1,CD40,APOE,CD63
GO:BP	positive regulation of defense response	GO:0031349	FALSE	3.8829675458241294e-8	7.4108362393093214	511	433	33	26944	TRAF3,CD86,LRRK2,IRAK2,APP,RBM47,RFTN1,JAK2,LYN,SRC,AP3B1,ESR1,CTSS,CLEC4E,OASL1,C3,NFKBIZ,TNIP1,H2-M2,PIK3R1,NLRP3,FPR3,NOD2,RIPK2,TRAF6,PTGS2,TREM2,CD40,CD14,ACOD1,ZC3HAV1,RSAD2,CLEC4N
GO:BP	positive regulation of DNA-templated transcription	GO:0045893	FALSE	4.203682032584818e-8	7.37637	1726	433	67	26944	MITF,ETV6,PID1,ZEB2,MAML2,RERE,SMYD3,RREB1,HEXB,CREB5,ZFP407,ELL2,NFE2L2,APP,WWOX,BCAS3,HIF1A,CD38,JAK2,IL1A,DYRK1A,MRTFA,RYBP,IFRD1,AP3B1,VEGFA,INHBA,CD274,RHOQ,ESR1,MDFIC,FOXO3,ZFP516,RFX3,NUP98,MAML3,TNKS,ZFHX3,ACVR2A,NCOA2,TCF12,PPARD,NFAT5,MED13,MET,HIVEP1,ZFP609,SUPT3,ARF4,GTF2F2,NFKBIZ,TNIP1,RGCC,JAG1,PIK3R1,ATXN1,NLRP3,TGFBR1,WAC,RPS6KA5,NOD2,TRAF6,SLC11A1,NFKB1,CD40,APOE,MAFB
GO:BP	positive regulation of RNA biosynthetic process	GO:1902680	FALSE	4.5348210128592576e-8	7.343439849653849	1729	433	67	26944	MITF,ETV6,PID1,ZEB2,MAML2,RERE,SMYD3,RREB1,HEXB,CREB5,ZFP407,ELL2,NFE2L2,APP,WWOX,BCAS3,HIF1A,CD38,JAK2,IL1A,DYRK1A,MRTFA,RYBP,IFRD1,AP3B1,VEGFA,INHBA,CD274,RHOQ,ESR1,MDFIC,FOXO3,ZFP516,RFX3,NUP98,MAML3,TNKS,ZFHX3,ACVR2A,NCOA2,TCF12,PPARD,NFAT5,MED13,MET,HIVEP1,ZFP609,SUPT3,ARF4,GTF2F2,NFKBIZ,TNIP1,RGCC,JAG1,PIK3R1,ATXN1,NLRP3,TGFBR1,WAC,RPS6KA5,NOD2,TRAF6,SLC11A1,NFKB1,CD40,APOE,MAFB
GO:BP	defense response to symbiont	GO:0140546	FALSE	4.767324303411231e-8	7.32173	1150	433	52	26944	NOS2,TRAF3,CD86,ARG2,NFE2L2,IRAK2,APP,RBM47,RFTN1,CLEC4D,JAK2,MALT1,DAPK1,LYN,SRC,AP3B1,ESR1,CLEC4E,JAK1,BNIP3,MIF,APOBEC1,OASL1,C3,NFKBIZ,TNIP1,H2-M2,PIK3R1,LYST,NLRP3,PTPN2,FPR3,RNF19B,CFB,CYBB,KYNU,NOD2,HTRA1,RIPK2,GCH1,TRAF6,TREM2,UBD,SLC11A1,NFKB1,CD40,CD14,APOE,ACOD1,ZC3HAV1,RSAD2,CLEC4N
GO:BP	cellular response to molecule of bacterial origin	GO:0071219	FALSE	4.957406907696839e-8	7.304745432413264	323	433	26	26944	ABCA1,NOS2,CD86,SASH1,IRAK2,JAK2,MALT1,IL1A,LYN,PDE4B,SRC,CD274,PPARD,MIF,ADAM9,NFKBIZ,TNIP1,NLRP3,NOD2,RIPK2,GCH1,TRAF6,TREM2,NFKB1,CD14,ACOD1
GO:BP	cellular homeostasis	GO:0019725	FALSE	5.3041468972685125e-8	7.275384456739465	869	433	44	26944	SLC8A1,FBXL5,CACNA1D,HEXB,LRRK2,NFE2L2,APP,AMBRA1,SLC7A11,LRRC8D,HIF1A,LARGE1,CLIC4,IL1A,LYN,MAP4K4,ERN1,AP3B1,FTH1,MYO5A,FOXO3,SOD2,GRINA,PPARD,PRDX5,BNIP3,ITPR1,ITGAV,GCLC,TRPM2,GLS,PIK3R1,HK2,DISC1,TXNRD1,IRS2,TREM2,HMOX1,TBXAS1,SLC11A1,CD40,APOE,FTL1,CREG1
GO:BP	tissue migration	GO:0090130	FALSE	5.6886753139386527e-8	7.244988853257863	325	433	26	26944	AKT3,ZEB2,TNS3,RREB1,HDAC9,SASH1,NFE2L2,BCAS3,HIF1A,SRC,VEGFA,PTEN,DOCK1,PPARD,MET,ADAM9,IQSEC1,ITGAV,RGCC,TGFBR1,IRS2,PTGS2,HMOX1,CD40,APOE,CD63
GO:BP	negative regulation of signal transduction	GO:0009968	FALSE	6.736939188343379e-8	7.171537372832286	1311	433	56	26944	LDLRAD4,PID1,PHLPP1,PTPRJ,ARHGAP24,TNS3,RNF149,PLCL2,PLEK,LRRK2,TANK,NFE2L2,APP,WWOX,FNIP1,RABGEF1,RFFL,HIF1A,NRG1,DYRK1A,CBLB,LYN,MRTFA,PDE4B,SRC,BCL6,ESR1,FOXO3,NXN,STK3,SOD2,TNFAIP6,PTEN,CHST11,GRINA,ITPR1,MIF,MET,ITGAV,GCLC,MDM2,TNIP1,ATXN1,NLRP3,TGFBR1,PTPN2,TMEM170B,NOD2,HTRA1,PTGS2,TREM2,HMOX1,PTPRO,APOE,IER3,ACOD1
GO:BP	regulation of inflammatory response	GO:0050727	FALSE	7.150642696943137e-8	7.1456549222280135	381	433	28	26944	SLC7A2,AOAH,LRRK2,APP,RABGEF1,JAK2,LYN,BCL6,ESR1,CTSS,TNFAIP6,PPARD,C3,NFKBIZ,TNIP1,H2-M2,NLRP3,PTPN2,FPR3,NOD2,CST7,PTGS2,TREM2,PTGES,BST1,NFKB1,APOE,IER3
GO:BP	small GTPase-mediated signal transduction	GO:0007264	FALSE	7.526336101757362e-8	7.123416391400247	437	433	30	26944	ABCA1,DENND1A,ARHGAP24,RAPGEF2,TNS3,LRRK2,VAV3,RASGEF1B,PDPN,RABGEF1,CYTH1,NRG1,ELMO1,SRC,BCL6,RHOQ,RALGPS1,SIPA1L1,DOCK1,MET,IQSEC1,ITGAV,SH2B2,DENND4A,KSR2,RAP1GAP2,RAPGEF6,HMOX1,DENND4C,APOE
GO:BP	response to molecule of bacterial origin	GO:0002237	FALSE	8.18744953351253e-8	7.086851363932628	467	433	31	26944	ABCA1,NOS2,CD86,SASH1,IRAK2,JAK2,MALT1,IL1A,LYN,PDE4B,SRC,CD274,SOD2,PPARD,MIF,ADAM9,ITGAV,NFKBIZ,TNIP1,NLRP3,MGST1,NOD2,RIPK2,GCH1,TRAF6,PTGS2,TREM2,SLC11A1,NFKB1,CD14,ACOD1
GO:BP	regulation of secretion	GO:0051046	FALSE	8.256892647895453e-8	7.083183361853126	746	433	40	26944	GNAQ,NOS2,CACNA1D,RAB8B,LRRK2,HTR7,PLA2G4A,MCTP1,RABGEF1,HIF1A,CD38,JAK2,NRG1,IL1A,SDC1,LYN,MAP4K4,INHBA,MYO5A,RFX3,ACVR2A,ENTPD1,BRAF,PPARD,ACSL4,ITPR1,EXOC2,MIF,RIC1,ADAM9,TRPM2,RGCC,SDC4,ITGAM,IRS2,TREM2,HMOX1,PTGES,APOE,RSAD2
GO:BP	positive regulation of RNA metabolic process	GO:0051254	FALSE	8.367524527186502e-8	7.0774030059488355	1877	433	70	26944	MITF,ETV6,PID1,ZEB2,MAML2,RERE,SMYD3,RREB1,HEXB,CREB5,ZFP407,ELL2,NFE2L2,APP,WWOX,BCAS3,HIF1A,CD38,JAK2,IL1A,DYRK1A,MRTFA,RYBP,IFRD1,ERN1,AP3B1,VEGFA,INHBA,CD274,RHOQ,ESR1,MDFIC,FOXO3,ZFP516,RFX3,NUP98,MAML3,TNKS,ZFHX3,ACVR2A,NCOA2,TCF12,PPARD,NFAT5,MED13,APOBEC1,MET,HIVEP1,ZFP609,SUPT3,ARF4,GTF2F2,NFKBIZ,TNIP1,RGCC,JAG1,PIK3R1,ATXN1,NLRP3,TGFBR1,WAC,RPS6KA5,NOD2,TRAF6,SLC11A1,NFKB1,CD40,APOE,MAF…
GO:BP	actin filament-based process	GO:0030029	FALSE	9.229448940234128e-8	7.034824228482208	782	433	41	26944	FMNL2,MYO1E,ZEB2,CACNA1D,PLEK,DIAPH2,PDPN,BCAS3,PSTPIP2,NEDD4L,EPB41L2,ELMO1,IL1A,MRTFA,CARMIL1,PDE4B,SRC,SRGAP2,BCL6,PDLIM5,IQGAP2,MYO5A,RHOQ,SH3KBP1,FMN1,NOS1AP,SIPA1L1,BRAF,SPECC1L,EPB41,MET,IQSEC1,SH2B2,TRPM2,RGCC,PIK3R1,SDC4,TGFBR1,SVIL,MYO3B,BST1
GO:BP	positive regulation of apoptotic process	GO:0043065	FALSE	1.0135362637529412e-7	6.994160707882621	622	433	36	26944	CAMK1D,CERS6,NOS2,RAPGEF2,APP,PLA2G4A,WWOX,FNIP1,HIF1A,JAK2,DAPK1,LYN,RYBP,SRC,INHBA,BCL6,CD274,FOXO3,STK3,SOD2,CTSS,MAP2K4,PTEN,BNIP3,ITPR1,RGCC,TGFBR1,PTPN2,BCL2L11,TXNRD1,HTRA1,RIPK2,PTGS2,HMOX1,UBD,CD40
GO:BP	negative regulation of response to stimulus	GO:0048585	FALSE	1.0775259916826409e-7	6.967572245150338	1723	433	66	26944	LDLRAD4,PID1,PHLPP1,PTPRJ,ARHGAP24,TNS3,AOAH,RNF149,PLCL2,PLEK,LRRK2,TANK,ARG2,NFE2L2,APP,DIAPH2,WWOX,MCTP1,FNIP1,RABGEF1,RFFL,HIF1A,NRG1,DYRK1A,CBLB,LYN,MRTFA,MAP4K4,PDE4B,SRC,BCL6,ESR1,FOXO3,NXN,STK3,SOD2,TNFAIP6,PTEN,CHST11,GRINA,PPARD,ITPR1,MIF,MET,ITGAV,GCLC,MDM2,TNIP1,H2-M2,ATXN1,NLRP3,TGFBR1,PTPN2,FPR3,TMEM170B,NOD2,HTRA1,CST7,PTGS2,TREM2,HMOX1,NFKB1,PTPRO,APOE,IER3,ACOD1
GO:BP	cellular catabolic process	GO:0044248	FALSE	1.133127036492318e-7	6.945721398031718	1524	433	61	26944	NOS2,ACSL1,TBC1D5,PDE7B,SND1,HEXB,ATG10,LRRK2,ARG2,NFE2L2,APP,PLA2G4A,RBM47,PLA2G7,VTI1A,AMBRA1,BCAS3,UVRAG,HIF1A,CPQ,ZCCHC7,DAPK1,PDE4B,SGPL1,VEGFA,INHBA,MYO5A,FOXO3,DRAM1,ACVR2A,ENTPD1,PPARD,PRDX5,BNIP3,PDE8A,APOBEC1,PSAP,AIG1,ZHX2,GLS,HK2,STK38L,BCL2L11,WAC,TXNRD1,ANPEP,BCKDHB,KYNU,NOD2,RIPK2,TRAF6,IRS2,DPYS,TREM2,HMOX1,SLC11A1,APOE,IER3,TENT5C,ZC3HAV1,CREG1
GO:BP	metabolic process	GO:0008152	FALSE	1.1704934070381715e-7	6.931631028182654	14364	433	297	26944	CAMK1D,TRPS1,MITF,CDK8,GPHN,ABCA1,CERS6,ETV6,PID1,IL31RA,FBXL5,NOS2,PHLPP1,TRAF3,EXT1,MYO1E,AKT3,ACSL1,FBXL17,PTPRJ,AFF1,FNIP2,SLC7A2,ZEB2,TBC1D5,MAN2A1,MAML2,PDE7B,RAPGEF2,RERE,TNS3,AOAH,RNF149,SMYD3,SND1,FARS2,RREB1,HEXB,PLCL2,CD86,HDAC9,CREB5,SLCO3A1,PLEK,ATG10,LRRK2,ARID1B,TANK,ZFP407,SASH1,SLC1A2,ELL2,ARG2,SIK3,PARP8,NFE2L2,BTBD9,IRAK2,MAN1A,TACO1,APP,PLA2G4A,ST3GAL1,RBM47,WWOX,JARID2,SGMS2,…
GO:BP	MAPK cascade	GO:0000165	FALSE	1.3345430989328786e-7	6.874667396154121	758	433	40	26944	PHLPP1,PTPRJ,RAPGEF2,RNF149,LRRK2,SASH1,APP,JAK2,NRG1,IL1A,LYN,SRC,ERN1,VEGFA,INHBA,ESR1,MDFIC,STK3,MAP4K3,MAP2K4,PTEN,BRAF,PDE8A,MIF,GPNMB,ITGAV,C3,PSAP,FRS2,TNIP1,TGFBR1,PTPN2,FPR3,KSR2,NOD2,RIPK2,TRAF6,TREM2,NFKB1,APOE
GO:BP	nitrogen compound metabolic process	GO:0006807	FALSE	1.3549134598308908e-7	6.868088442884151	12143	433	262	26944	CAMK1D,TRPS1,MITF,CDK8,GPHN,ABCA1,CERS6,ETV6,PID1,IL31RA,FBXL5,NOS2,PHLPP1,TRAF3,EXT1,MYO1E,AKT3,ACSL1,FBXL17,PTPRJ,FNIP2,SLC7A2,ZEB2,MAN2A1,MAML2,PDE7B,RAPGEF2,RERE,RNF149,SMYD3,SND1,FARS2,RREB1,HEXB,CD86,HDAC9,CREB5,SLCO3A1,ATG10,LRRK2,ARID1B,TANK,ZFP407,SASH1,SLC1A2,ELL2,ARG2,SIK3,PARP8,NFE2L2,BTBD9,IRAK2,MAN1A,TACO1,APP,PLA2G4A,ST3GAL1,RBM47,WWOX,JARID2,SGMS2,PLA2G7,AMBRA1,FNIP1,BCAS3,SLC7A11…
GO:BP	negative regulation of signaling	GO:0023057	FALSE	1.3990702261864323e-7	6.854160485594093	1453	433	59	26944	LDLRAD4,PID1,PHLPP1,PTPRJ,ARHGAP24,TNS3,RNF149,PLCL2,PLEK,LRRK2,TANK,NFE2L2,APP,WWOX,FNIP1,RABGEF1,RFFL,HIF1A,CD38,NRG1,DYRK1A,CBLB,LYN,MRTFA,MAP4K4,PDE4B,SRC,BCL6,MYO5A,ESR1,FOXO3,NXN,STK3,SOD2,TNFAIP6,PTEN,CHST11,GRINA,ITPR1,MIF,MET,ITGAV,GCLC,MDM2,TNIP1,ATXN1,NLRP3,TGFBR1,PTPN2,TMEM170B,NOD2,HTRA1,PTGS2,TREM2,HMOX1,PTPRO,APOE,IER3,ACOD1
GO:BP	negative regulation of cell communication	GO:0010648	FALSE	1.517123769595106e-7	6.818978987268963	1456	433	59	26944	LDLRAD4,PID1,PHLPP1,PTPRJ,ARHGAP24,TNS3,RNF149,PLCL2,PLEK,LRRK2,TANK,NFE2L2,APP,WWOX,FNIP1,RABGEF1,RFFL,HIF1A,CD38,NRG1,DYRK1A,CBLB,LYN,MRTFA,MAP4K4,PDE4B,SRC,BCL6,MYO5A,ESR1,FOXO3,NXN,STK3,SOD2,TNFAIP6,PTEN,CHST11,GRINA,ITPR1,MIF,MET,ITGAV,GCLC,MDM2,TNIP1,ATXN1,NLRP3,TGFBR1,PTPN2,TMEM170B,NOD2,HTRA1,PTGS2,TREM2,HMOX1,PTPRO,APOE,IER3,ACOD1
GO:BP	organonitrogen compound catabolic process	GO:1901565	FALSE	1.521063120907057e-7	6.817852763269271	1378	433	57	26944	FBXL5,NOS2,EXT1,FBXL17,PDE7B,RNF149,HEXB,LRRK2,ARG2,NFE2L2,APP,PLA2G4A,PLA2G7,AMBRA1,RFFL,HIF1A,RNF217,NEDD4L,MALT1,CPQ,NRG1,CBLB,RYBP,PDE4B,ERN1,SGPL1,FBXO11,ARIH1,CTSS,SMOX,ENTPD1,PTEN,BNIP3,PDE8A,APOBEC1,RIC1,PSAP,GCLC,MDM2,GLS,HK2,SPSB1,WAC,DISC1,RNF19B,ANPEP,BCKDHB,KYNU,RNF128,DPYS,TREM2,HMOX1,TIPARP,UBD,APOE,IER3,CTSB
GO:BP	enzyme-linked receptor protein signaling pathway	GO:0007167	FALSE	1.6115893187387585e-7	6.792745619682884	970	433	46	26944	OSBPL8,LDLRAD4,PID1,EXT1,MYO1E,PTPRJ,ZEB2,RAPGEF2,DIAPH2,RABGEF1,HIF1A,JAK2,NRG1,CBLB,LYN,SRC,MBD5,SGPL1,VEGFA,INHBA,NRP2,RHOQ,ESR1,TNFAIP6,ACVR2A,PTEN,SIPA1L1,BRAF,CHST11,FAM20C,MET,HIVEP1,ADAM9,ARF4,FRS2,SH2B2,PIK3R1,ATXN1,TGFBR1,PTPN2,HTRA1,IRS2,TIPARP,PTPN12,MERTK,CD63
GO:BP	response to lipopolysaccharide	GO:0032496	FALSE	1.6296792707497722e-7	6.7879	451	433	30	26944	ABCA1,NOS2,CD86,SASH1,IRAK2,JAK2,MALT1,IL1A,LYN,PDE4B,SRC,CD274,SOD2,PPARD,MIF,ADAM9,NFKBIZ,TNIP1,NLRP3,MGST1,NOD2,RIPK2,GCH1,TRAF6,PTGS2,TREM2,SLC11A1,NFKB1,CD14,ACOD1
GO:BP	organic substance catabolic process	GO:1901575	FALSE	1.6942012552190549e-7	6.771035000829695	2076	433	74	26944	FBXL5,NOS2,EXT1,FBXL17,PDE7B,AOAH,RNF149,SND1,HEXB,LRRK2,ARG2,NFE2L2,APP,PLA2G4A,RBM47,PLA2G7,AMBRA1,UVRAG,RFFL,HIF1A,RNF217,NEDD4L,MALT1,CPQ,ZCCHC7,NRG1,CBLB,RYBP,PDE4B,ERN1,SGPL1,FBXO11,VEGFA,ARIH1,GPD2,CTSS,PRDX6,SMOX,ENTPD1,PTEN,PPARD,BNIP3,PDE8A,APOBEC1,RIC1,PSAP,GCLC,MDM2,AIG1,ZHX2,GLS,HK2,PLD1,SPSB1,WAC,DISC1,RNF19B,ANPEP,BCKDHB,KYNU,RNF128,RBKS,IRS2,DPYS,TREM2,HMOX1,TIPARP,UBD,SLC11A1,APO…
GO:BP	growth	GO:0040007	FALSE	1.7284834156694682e-7	6.76233	1044	433	48	26944	KPNA1,EXT1,PTPRJ,ZEB2,SLC1A2,SIK3,APP,JARID2,RFTN1,APBA1,HIF1A,LARGE1,CD38,CLIC4,NEDD4L,CPQ,SLC23A2,NRG1,ALCAM,IFRD1,SRC,MBD5,SGPL1,VEGFA,INHBA,BCL6,NRP2,PDLIM5,ESR1,GPD2,FOXO3,STK3,TNFAIP6,FMN1,MAP2K4,PTEN,TEC,CHST11,PPARD,ACSL4,C3,PSAP,TGFBR1,BCL2L11,DISC1,DCSTAMP,APOE,PTPN12
GO:BP	regulation of cell projection organization	GO:0031344	FALSE	1.757229478727487e-7	6.755171519758359	765	433	40	26944	CAMK1D,ARHGAP24,ZEB2,RAPGEF2,RREB1,RAB8B,LRRK2,HTR7,NFE2L2,APP,DIAPH2,PDPN,CD38,NEDD4L,NRG1,LYN,CARMIL1,IFRD1,MAP4K4,SRC,VEGFA,PDLIM5,RHOQ,PTEN,SIPA1L1,BRAF,ITPR1,NTNG2,ARF4,MDM2,TRPM2,PIK3R1,PLD1,TGFBR1,DISC1,RAP1GAP2,HOMER1,MYO3B,TREM2,APOE
GO:BP	activation of innate immune response	GO:0002218	FALSE	1.9324674002873657e-7	6.713887823668228	292	433	24	26944	TRAF3,CD86,IRAK2,APP,RFTN1,LYN,SRC,AP3B1,ESR1,CLEC4E,OASL1,NFKBIZ,TNIP1,PIK3R1,NLRP3,NOD2,RIPK2,TRAF6,TREM2,CD40,CD14,ZC3HAV1,RSAD2,CLEC4N
GO:BP	positive regulation of nucleobase-containing compound metabolic process	GO:0045935	FALSE	1.9765246494744258e-7	6.704097765149004	2083	433	74	26944	MITF,ETV6,PID1,ZEB2,MAML2,RERE,SMYD3,RREB1,HEXB,CREB5,ARID1B,ZFP407,ELL2,NFE2L2,APP,WWOX,BCAS3,HIF1A,CD38,JAK2,IL1A,DYRK1A,MRTFA,BABAM2,RYBP,IFRD1,ERN1,AP3B1,VEGFA,INHBA,CD274,RHOQ,ESR1,MDFIC,FOXO3,ZFP516,RFX3,NUP98,MAML3,TNKS,ZFHX3,ACVR2A,MAP2K4,NCOA2,TCF12,PPARD,NFAT5,MED13,APOBEC1,MET,HIVEP1,ZFP609,SUPT3,ARF4,GTF2F2,NFKBIZ,TNIP1,RGCC,JAG1,PIK3R1,ATXN1,NLRP3,TGFBR1,WAC,RPS6KA5,NOD2,TRAF6,TREM2,…
GO:BP	regulation of molecular function	GO:0065009	FALSE	2.13609205769564e-7	6.67038	838	433	42	26944	CAMK1D,TRAF3,DENND1A,PTPRJ,LRCH1,RAPGEF2,CACNA1D,CD86,TANK,ASAP1,BCAS3,RFFL,JAK2,DAPK1,LYN,ERN1,SRGAP2,VEGFA,IQGAP2,ESR1,CTSS,PTEN,SIPA1L1,MIF,MED13,ITGAV,CMKLR1,NLRP3,PTPN2,DISC1,RPS6KA5,HOMER1,NOD2,RIPK2,CST7,TRAF6,IRS2,PTGS2,TREM2,PTPRO,APOE,CTSB
GO:BP	defense response to other organism	GO:0098542	FALSE	2.573273751863911e-7	6.58951	1281	433	54	26944	IL31RA,NOS2,TRAF3,CD86,ARG2,NFE2L2,IRAK2,APP,RBM47,RFTN1,CLEC4D,JAK2,MALT1,DAPK1,LYN,SRC,AP3B1,ESR1,CLEC4E,PTEN,JAK1,BNIP3,MIF,APOBEC1,OASL1,C3,NFKBIZ,TNIP1,H2-M2,PIK3R1,LYST,NLRP3,PTPN2,FPR3,RNF19B,CFB,CYBB,KYNU,NOD2,HTRA1,RIPK2,GCH1,TRAF6,TREM2,UBD,SLC11A1,NFKB1,CD40,CD14,APOE,ACOD1,ZC3HAV1,RSAD2,CLEC4N
GO:BP	vesicle-mediated transport	GO:0016192	FALSE	2.6732218134108694e-7	6.572965003703768	1517	433	60	26944	CAMK1D,ABCA1,DENND1A,MYO1E,PTPRJ,EXOC4,TBC1D5,CACNA1D,RAB8B,PLEK,LRRK2,VAV3,BTBD9,APP,PLA2G4A,VTI1A,MCTP1,RABGEF1,UVRAG,NEDD4L,VPS13B,NRG1,ELMO1,SDC1,LYN,CARMIL1,SRC,AP3B1,VEGFA,MYO5A,RHOQ,SH3KBP1,EXOC6B,PTEN,BRAF,DOCK1,EXOC2,RIC1,IQSEC1,ITGAV,LMBRD1,C3,ARF4,LYST,PLD1,SDC4,SCFD2,FPR3,NOD2,OLR1,ITGAM,LRP12,TREM2,HMOX1,SLC11A1,CD14,APOE,MERTK,CD63,CREG1
GO:BP	regulation of innate immune response	GO:0045088	FALSE	3.0829003612360227e-7	6.511040511363227	463	433	30	26944	TRAF3,CD86,NFE2L2,IRAK2,APP,RBM47,RFTN1,LYN,SRC,AP3B1,ESR1,CLEC4E,OASL1,NFKBIZ,TNIP1,H2-M2,PIK3R1,NLRP3,PTPN2,FPR3,NOD2,RIPK2,TRAF6,TREM2,CD40,CD14,APOE,ZC3HAV1,RSAD2,CLEC4N
GO:BP	organic anion transport	GO:0015711	FALSE	3.247894433902042e-7	6.488398095046284	464	433	30	26944	NOS2,ACSL1,SLC7A2,LRRC8C,SLCO3A1,SLC1A2,ARG2,PLA2G4A,SLC7A11,LRRC8D,APBA1,SLC23A2,IL1A,SLC2A1,SLC38A6,PPARD,ACSL4,SLC22A4,MIF,SLC16A10,FABP5,SLC7A8,PSAP,ABCC5,MGST1,IRS2,PTGS2,PTGES,SLC11A1,APOE
GO:BP	negative regulation of multicellular organismal process	GO:0051241	FALSE	3.358775037726098e-7	6.473819083132424	1214	433	52	26944	LDLRAD4,RAPGEF2,PLCL2,CD86,HDAC9,ARG2,APP,JARID2,RABGEF1,HIF1A,CD38,JAK2,NRG1,CBLB,LYN,IFRD1,PDE4B,VEGFA,INHBA,BCL6,FOXP4,CD274,STK3,SRGN,TNFAIP6,PTEN,PROCR,SFMBT1,GPNMB,GCLC,FRS2,PAG1,RGCC,PIK3R1,CMKLR1,SDC4,NLRP3,TGFBR1,PTPN2,RNF128,NOD2,CST7,PTGS2,TREM2,HMOX1,SLC11A1,NFKB1,PTPRO,APOE,MAFB,MERTK,CD63
GO:BP	protein localization	GO:0008104	FALSE	3.57200022708742e-7	6.447088522173522	2594	433	85	26944	OSBPL8,GPHN,ABCA1,PID1,KPNA1,GNAQ,NOS2,DENND1A,EXOC4,TBC1D5,RAPGEF2,CACNA1D,SMYD3,RAB8B,PLEK,LRRK2,SIK3,MAN1A,APP,DIAPH2,JARID2,RFTN1,ASAP1,VTI1A,SLC7A11,RABGEF1,APBA1,RFFL,HIF1A,MPP7,LARGE1,CD38,NEDD4L,JAK2,EPB41L2,IL1A,MAP4K4,SRC,AP3B1,VEGFA,BCL6,MYO5A,RHOQ,ESR1,MDFIC,SH3KBP1,STK3,SRGN,KPNA4,RFX3,TNFAIP6,NUP98,EXOC6B,TNKS,BRAF,JAK1,EPB41,IMMP2L,PPARD,ACSL4,ITPR1,EXOC2,APOBEC1,RIC1,ASTN2,ADAM9,L…
GO:BP	generation of neurons	GO:0048699	FALSE	3.716537932039419e-7	6.429861430305849	1651	433	63	26944	CAMK1D,GNAQ,EXT1,ABI1,ZEB2,RAPGEF2,RERE,HDAC9,LRRK2,HTR7,NFE2L2,APP,DIAPH2,ASAP1,HIF1A,LARGE1,CD38,NEDD4L,JAK2,MALT1,SLC23A2,NRG1,ALCAM,LYN,MRTFA,IFRD1,B4GALT5,MAP4K4,SRGAP2,VEGFA,INHBA,BCL6,NRP2,PDLIM5,FOXO3,SOD2,ZFHX3,PTEN,SIPA1L1,BRAF,TCF12,ACSL4,ITPR1,NTNG2,ASTN2,IQSEC1,ZFP609,C3,ARF4,PSAP,MDM2,FRS2,ZHX2,JAG1,SDC4,TGFBR1,DST,DISC1,RAP1GAP2,MYO3B,LRP12,PTPRO,APOE
GO:BP	regulation of plasma membrane bounded cell projection organization	GO:0120035	FALSE	3.753025996939278e-7	6.4256184272500745	751	433	39	26944	CAMK1D,ARHGAP24,ZEB2,RAPGEF2,RREB1,LRRK2,HTR7,NFE2L2,APP,DIAPH2,PDPN,CD38,NEDD4L,NRG1,LYN,CARMIL1,IFRD1,MAP4K4,SRC,VEGFA,PDLIM5,RHOQ,PTEN,SIPA1L1,BRAF,ITPR1,NTNG2,ARF4,MDM2,TRPM2,PIK3R1,PLD1,TGFBR1,DISC1,RAP1GAP2,HOMER1,MYO3B,TREM2,APOE
GO:BP	developmental growth	GO:0048589	FALSE	3.783205156699895e-7	6.422140107026891	785	433	40	26944	KPNA1,EXT1,ZEB2,SLC1A2,SIK3,APP,JARID2,APBA1,LARGE1,CLIC4,NEDD4L,CPQ,SLC23A2,NRG1,ALCAM,IFRD1,SRC,MBD5,SGPL1,VEGFA,NRP2,PDLIM5,ESR1,GPD2,FOXO3,STK3,TNFAIP6,FMN1,MAP2K4,PTEN,TEC,CHST11,PPARD,C3,PSAP,TGFBR1,BCL2L11,DISC1,APOE,PTPN12
GO:BP	response to decreased oxygen levels	GO:0036293	FALSE	4.134675295746633e-7	6.3835585907795185	383	433	27	26944	NOS2,ZEB2,NFE2L2,HIF1A,CD38,CPEB4,IL1A,SLC2A1,SRC,VEGFA,INHBA,FOXO3,SOD2,CPEB2,ACVR2A,PTEN,PPARD,BNIP3,ITPR1,MDM2,RGCC,HK2,EGLN3,CYBB,PTGS2,TREM2,HMOX1
GO:BP	cellular nitrogen compound biosynthetic process	GO:0044271	FALSE	4.196954091929831e-7	6.377065781260416	4715	433	129	26944	CAMK1D,TRPS1,MITF,CDK8,CERS6,ETV6,PID1,NOS2,TRAF3,ACSL1,FNIP2,SLC7A2,ZEB2,MAML2,RERE,SMYD3,FARS2,RREB1,HEXB,HDAC9,CREB5,ARID1B,ZFP407,SLC1A2,ELL2,ARG2,NFE2L2,TACO1,APP,ST3GAL1,WWOX,JARID2,SGMS2,AMBRA1,FNIP1,BCAS3,SLC7A11,HIF1A,CD38,JAK2,CPEB4,NRG1,IL1A,DYRK1A,DAPK1,CDYL2,MRTFA,RYBP,CDKAL1,IFRD1,B4GALT5,SRC,ERN1,AP3B1,VEGFA,INHBA,BCL6,FOXP4,CD274,RHOQ,ESR1,ST3GAL3,MDFIC,FOXO3,SOD2,ZFP516,CPEB2,RFX…
GO:BP	cellular macromolecule localization	GO:0070727	FALSE	4.326360234108263e-7	6.363877321889085	2604	433	85	26944	OSBPL8,GPHN,ABCA1,PID1,KPNA1,GNAQ,NOS2,DENND1A,EXOC4,TBC1D5,RAPGEF2,CACNA1D,SMYD3,RAB8B,PLEK,LRRK2,SIK3,MAN1A,APP,DIAPH2,JARID2,RFTN1,ASAP1,VTI1A,SLC7A11,RABGEF1,APBA1,RFFL,HIF1A,MPP7,LARGE1,CD38,NEDD4L,JAK2,EPB41L2,IL1A,MAP4K4,SRC,AP3B1,VEGFA,BCL6,MYO5A,RHOQ,ESR1,MDFIC,SH3KBP1,STK3,SRGN,KPNA4,RFX3,TNFAIP6,NUP98,EXOC6B,TNKS,BRAF,JAK1,EPB41,IMMP2L,PPARD,ACSL4,ITPR1,EXOC2,APOBEC1,RIC1,ASTN2,ADAM9,L…
GO:BP	positive regulation of innate immune response	GO:0045089	FALSE	4.920371516417513e-7	6.308002104257319	386	433	27	26944	TRAF3,CD86,IRAK2,APP,RBM47,RFTN1,LYN,SRC,AP3B1,ESR1,CLEC4E,OASL1,NFKBIZ,TNIP1,H2-M2,PIK3R1,NLRP3,FPR3,NOD2,RIPK2,TRAF6,TREM2,CD40,CD14,ZC3HAV1,RSAD2,CLEC4N
GO:BP	regulation of phosphorus metabolic process	GO:0051174	FALSE	5.219188236721155e-7	6.282397039474285	1042	433	47	26944	PID1,IL31RA,PHLPP1,PTPRJ,FNIP2,RAPGEF2,SMYD3,CD86,SLCO3A1,PLEK,LRRK2,APP,AMBRA1,FNIP1,RABGEF1,HIF1A,JAK2,NRG1,LYN,SRC,ERN1,MOB3B,VEGFA,INHBA,ACVR2A,MAP2K4,ENTPD1,PTEN,BRAF,FAM20C,MIF,GPNMB,C3,PIK3R1,ATXN1,PTPN2,FPR3,NOD2,RIPK2,IRS2,PTGS2,TREM2,BST1,CD40,PTPRO,IER3,CLEC4N
GO:BP	positive regulation of cell differentiation	GO:0045597	FALSE	5.340845598773647e-7	6.272389977089816	970	433	45	26944	ZEB2,MAN2A1,RAPGEF2,RREB1,ARID1B,APP,PDPN,AMBRA1,HIF1A,JAK2,MALT1,NRG1,LYN,AP3B1,VEGFA,INHBA,BCL6,FOXO3,STK3,SOD2,RFX3,ATP11C,ACVR2A,SUCO,PTEN,BRAF,FAM20C,TCF12,ZFP609,MDM2,NFKBIZ,RGCC,JAG1,PIK3R1,ATXN1,CMKLR1,NLRP3,TGFBR1,DISC1,RIPK2,DCSTAMP,TRAF6,PTGS2,TREM2,APOE
GO:BP	response to lipid	GO:0033993	FALSE	5.469409292630731e-7	6.262059575824497	1155	433	50	26944	ABCA1,PID1,NOS2,ACSL1,SMYD3,CD86,SASH1,HTR7,IRAK2,CD38,JAK2,MALT1,IL1A,SDC1,LYN,PDE4B,SRC,INHBA,CD274,ESR1,FOXO3,SOD2,HDAC8,NCOA2,PPARD,MIF,ADAM9,GRAMD1B,MDM2,NFKBIZ,TNIP1,PIK3R1,NLRP3,TGFBR1,MGST1,CYBB,BCKDHB,NOD2,RIPK2,ITGAM,GCH1,TRAF6,PTGS2,TREM2,TBXAS1,SLC11A1,NFKB1,CD14,ACOD1,ALAS1
GO:BP	response to hormone	GO:0009725	FALSE	5.65898307556343e-7	6.2472616049161305	1008	433	46	26944	OSBPL8,PID1,NOS2,AKT3,ACSL1,PTPRJ,SMYD3,HDAC9,ARID1B,HTR7,NFE2L2,BCAS3,CD38,JAK2,SDC1,LYN,SLC2A1,SRC,MBD5,INHBA,MYO5A,RHOQ,ESR1,FOXO3,CPEB2,CTSS,HDAC8,PTEN,BRAF,NCOA2,TCF12,PPARD,GCLC,MDM2,SH2B2,PIK3R1,TGFBR1,PTPN2,CYBB,BCKDHB,IRS2,PTGS2,HMOX1,NFKB1,DENND4C,CTSB
GO:BP	positive regulation of lymphocyte activation	GO:0051251	FALSE	5.6889217562872e-7	6.244970039346377	334	433	25	26944	CD86,ARID1B,VAV3,AMBRA1,CD38,JAK2,MALT1,IL1A,AP3B1,BCL6,CD274,FOXO3,HSPH1,SH3KBP1,ATP11C,MIF,ZFP609,NFKBIZ,H2-M2,NLRP3,NOD2,RIPK2,TRAF6,IRS2,CD40
GO:BP	leukocyte cell-cell adhesion	GO:0007159	FALSE	6.094584511192746e-7	6.215055896386355	418	433	28	26944	EXT1,CD86,ARID1B,ARG2,AMBRA1,JAK2,MALT1,IL1A,CBLB,AP3B1,BCL6,CD274,FOXO3,HSPH1,PTEN,NFAT5,GPNMB,ZFP609,NFKBIZ,TNIP1,PAG1,H2-M2,SDC4,NLRP3,PTPN2,RIPK2,OLR1,TRAF6
GO:BP	intracellular chemical homeostasis	GO:0055082	FALSE	7.166152095738876e-7	6.144713978525597	768	433	39	26944	SLC8A1,FBXL5,CACNA1D,HEXB,LRRK2,APP,SLC7A11,LRRC8D,HIF1A,CLIC4,IL1A,LYN,MAP4K4,ERN1,AP3B1,FTH1,MYO5A,FOXO3,SOD2,GRINA,PPARD,BNIP3,ITPR1,ITGAV,GCLC,TRPM2,GLS,PIK3R1,HK2,DISC1,IRS2,TREM2,HMOX1,TBXAS1,SLC11A1,CD40,APOE,FTL1,CREG1
GO:BP	endocytosis	GO:0006897	FALSE	7.241308919239304e-7	6.14018	701	433	37	26944	CAMK1D,ABCA1,DENND1A,MYO1E,PTPRJ,TBC1D5,LRRK2,BTBD9,APP,MCTP1,RABGEF1,NEDD4L,NRG1,ELMO1,SDC1,CARMIL1,SRC,VEGFA,RHOQ,SH3KBP1,PTEN,DOCK1,IQSEC1,ITGAV,LMBRD1,C3,FPR3,NOD2,OLR1,LRP12,TREM2,SLC11A1,CD14,APOE,MERTK,CD63,CREG1
GO:BP	regulation of epithelial cell migration	GO:0010632	FALSE	8.141273157294375e-7	6.08931	238	433	21	26944	AKT3,RREB1,HDAC9,SASH1,NFE2L2,BCAS3,HIF1A,SRC,VEGFA,PTEN,DOCK1,MET,ADAM9,IQSEC1,RGCC,IRS2,PTGS2,HMOX1,CD40,APOE,CD63
GO:BP	negative regulation of metabolic process	GO:0009892	FALSE	8.440081402744561e-7	6.073653364678576	3336	433	100	26944	TRPS1,MITF,CDK8,ETV6,PID1,NOS2,AKT3,PTPRJ,FNIP2,ZEB2,RAPGEF2,RERE,SND1,RREB1,PLCL2,HDAC9,PLEK,LRRK2,ARG2,APP,RBM47,JARID2,FNIP1,RABGEF1,RFFL,HIF1A,CD38,CPEB4,ZCCHC7,NRG1,DYRK1A,DAPK1,FAM172A,CDYL2,LYN,RYBP,SRC,ERN1,VEGFA,BCL6,FOXP4,CD274,ESR1,MDFIC,FOXO3,NXN,SRGN,CPEB2,RFX3,TNKS,ZFHX3,HDAC8,ENTPD1,PTEN,NCOA2,PPARD,PRDX5,BNIP3,CDYL,MIF,APOBEC1,SFMBT1,RIC1,HIVEP1,GPNMB,ITGAV,GCLC,MDM2,ZHX2,RGCC,PIK…
GO:BP	positive regulation of protein modification process	GO:0031401	FALSE	9.665552671865952e-7	6.014773308166275	742	433	38	26944	IL31RA,PTPRJ,FNIP2,RAPGEF2,SMYD3,CD86,SLCO3A1,LRRK2,TANK,APP,AMBRA1,FNIP1,JAK2,NRG1,DYRK1A,CBLB,LYN,SRC,ERN1,MOB3B,VEGFA,INHBA,ACVR2A,MAP2K4,PTEN,BRAF,MIF,GPNMB,C3,TNIP1,PIK3R1,FPR3,NOD2,RIPK2,PTGS2,TREM2,CD40,CLEC4N
GO:BP	protein transport	GO:0015031	FALSE	1.09534e-06	5.9604508935155645	1452	433	57	26944	ABCA1,KPNA1,GNAQ,NOS2,DENND1A,EXOC4,TBC1D5,CACNA1D,RAB8B,PLEK,LRRK2,APP,RFTN1,VTI1A,SLC7A11,RABGEF1,APBA1,RFFL,HIF1A,LARGE1,CD38,JAK2,IL1A,MAP4K4,SRC,AP3B1,MYO5A,MDFIC,SH3KBP1,STK3,KPNA4,RFX3,NUP98,EXOC6B,TNKS,PPARD,ACSL4,ITPR1,EXOC2,APOBEC1,RIC1,ASTN2,ADAM9,ARF4,PSAP,MDM2,TRPM2,PIK3R1,SCFD2,SNX24,IRS2,PTGS2,TREM2,DENND4C,APOE,RSAD2,CD63
GO:BP	lipid localization	GO:0010876	FALSE	1.11635e-06	5.9522012183036415	519	433	31	26944	OSBPL8,ABCA1,NOS2,ACSL1,HEXB,SLCO3A1,PLA2G4A,OSBPL3,ATP8B4,VPS13B,NRG1,IL1A,SLC2A1,INHBA,ATP11C,TEX2,PPARD,ACSL4,MIF,FABP5,ITGAV,GRAMD1B,C3,PSAP,PTPN2,IRS2,PTGS2,TREM2,PTGES,STRA6L,APOE
GO:BP	response to peptide hormone	GO:0043434	FALSE	1.14124e-06	5.94262	489	433	30	26944	OSBPL8,PID1,AKT3,PTPRJ,HDAC9,ARID1B,NFE2L2,JAK2,LYN,SLC2A1,SRC,MBD5,INHBA,MYO5A,RHOQ,CPEB2,PTEN,BRAF,NCOA2,TCF12,GCLC,MDM2,SH2B2,PIK3R1,PTPN2,CYBB,IRS2,PTGS2,NFKB1,DENND4C
GO:BP	response to reactive oxygen species	GO:0000302	FALSE	1.17329e-06	5.930594838313619	219	433	20	26944	LRRK2,NFE2L2,HIF1A,IL1A,SDC1,SRC,ERN1,FOXO3,SOD2,KPNA4,MAP2K4,PRDX5,BNIP3,MET,ADAM9,PSAP,MDM2,TRPM2,GCH1,HMOX1
GO:BP	anatomical structure formation involved in morphogenesis	GO:0048646	FALSE	1.22779e-06	5.910875712452184	1221	433	51	26944	EXT1,AKT3,EXOC4,ARHGAP24,ABI1,ZEB2,HDAC9,SASH1,VAV3,NFE2L2,PDPN,BCAS3,HIF1A,LARGE1,CLIC4,VPS13B,IL1A,VEGFA,INHBA,BCL6,NRP2,STK3,FMN1,PTEN,SPECC1L,JAK1,FAM20C,DOCK1,MTHFD1L,ADAM9,ITGAV,C3,PSAP,FRS2,RGCC,HK2,SDC4,TGFBR1,BCL2L11,MXI1,TXNRD1,ANPEP,CYBB,ARHGAP22,DCSTAMP,TRAF6,PTGS2,TREM2,HMOX1,CD40,MAFB
GO:BP	regulation of nucleobase-containing compound metabolic process	GO:0019219	FALSE	1.4077e-06	5.851488567818873	3949	433	112	26944	CAMK1D,TRPS1,MITF,CDK8,ETV6,PID1,TRAF3,FNIP2,ZEB2,MAML2,RERE,SMYD3,RREB1,HEXB,HDAC9,CREB5,ARID1B,ZFP407,ELL2,NFE2L2,APP,RBM47,WWOX,JARID2,AMBRA1,FNIP1,BCAS3,HIF1A,CD38,JAK2,NRG1,IL1A,DYRK1A,FAM172A,CDYL2,MRTFA,BABAM2,RYBP,IFRD1,SRC,ERN1,AP3B1,VEGFA,INHBA,BCL6,FOXP4,CD274,RHOQ,ESR1,MDFIC,FOXO3,SOD2,ZFP516,RFX3,LIN54,NUP98,MAML3,TNKS,ZFHX3,ACVR2A,MAP2K4,HDAC8,ENTPD1,NCOA2,TCF12,PPARD,NFAT5,PRDX5,PD…
GO:BP	positive regulation of adaptive immune response	GO:0002821	FALSE	1.42029e-06	5.847622842147856	155	433	17	26944	PLA2G4A,JAK2,MALT1,CD274,MIF,C3,NFKBIZ,H2-M2,NLRP3,NOD2,RIPK2,TRAF6,TREM2,SLC11A1,CD40,RSAD2,CLEC4N
GO:BP	regulation of phosphate metabolic process	GO:0019220	FALSE	1.59244e-06	5.797935951417822	1041	433	46	26944	PID1,IL31RA,PHLPP1,PTPRJ,FNIP2,RAPGEF2,SMYD3,CD86,SLCO3A1,PLEK,LRRK2,APP,AMBRA1,FNIP1,RABGEF1,HIF1A,JAK2,NRG1,LYN,SRC,ERN1,MOB3B,VEGFA,INHBA,ACVR2A,MAP2K4,ENTPD1,PTEN,BRAF,MIF,GPNMB,C3,PIK3R1,ATXN1,PTPN2,FPR3,NOD2,RIPK2,IRS2,PTGS2,TREM2,BST1,CD40,PTPRO,IER3,CLEC4N
GO:BP	response to bacterium	GO:0009617	FALSE	1.61956e-06	5.790603251311247	968	433	44	26944	ABCA1,NOS2,CD86,SASH1,ARG2,IRAK2,APP,SAA3,CLEC4D,JAK2,MALT1,IL1A,LYN,PDE4B,SRC,CD274,SOD2,CLEC4E,PTEN,PPARD,BNIP3,MIF,ADAM9,ITGAV,C3,NFKBIZ,TNIP1,H2-M2,NLRP3,FPR3,CFB,MGST1,NOD2,RIPK2,ITGAM,GCH1,TRAF6,PTGS2,TREM2,SLC11A1,NFKB1,CD14,AA467197,ACOD1
GO:BP	circulatory system process	GO:0003013	TRUE	1.67077e-06	5.777084152630195	559	433	32	26944	SLC8A1,GNAQ,NOS2,EXT1,PTPRJ,ZEB2,CACNA1D,HTR7,APP,HIF1A,CD38,NEDD4L,JAK2,SLC2A1,PDE4B,SRC,VEGFA,SOD2,NOS1AP,IMMP2L,PPARD,FABP5,GCLC,MDM2,PIK3R1,GCH1,PTGS2,HMOX1,TBXAS1,PTPRO,APOE,IER3
GO:BP	blood coagulation	GO:0007596	FALSE	1.68205e-06	5.774160705670554	178	433	18	26944	GNAQ,PTPRJ,PLEK,NFE2L2,PLA2G4A,PDPN,SLC7A11,JAK2,LYN,F13A1,AP3B1,ENTPD1,TEC,PROCR,F10,PAPSS2,APOE,MERTK
GO:BP	ERK1 and ERK2 cascade	GO:0070371	FALSE	1.70131e-06	5.769216079417168	352	433	25	26944	PHLPP1,RAPGEF2,APP,NRG1,IL1A,LYN,SRC,VEGFA,INHBA,ESR1,PTEN,BRAF,PDE8A,MIF,GPNMB,ITGAV,C3,FRS2,TNIP1,PTPN2,FPR3,NOD2,RIPK2,TREM2,APOE
GO:BP	positive regulation of epithelial cell migration	GO:0010634	FALSE	1.73588e-06	5.7604797241633605	157	433	17	26944	AKT3,RREB1,HDAC9,SASH1,NFE2L2,BCAS3,HIF1A,SRC,VEGFA,DOCK1,MET,ADAM9,IQSEC1,IRS2,PTGS2,HMOX1,CD40
GO:BP	regulation of cell differentiation	GO:0045595	FALSE	1.87499e-06	5.727	1761	433	64	26944	MITF,LDLRAD4,GNAQ,ZEB2,MAN2A1,RAPGEF2,RREB1,LRRK2,ARID1B,NFE2L2,APP,PDPN,AMBRA1,FNIP1,HIF1A,JAK2,MALT1,NRG1,IL1A,LYN,IFRD1,AP3B1,VEGFA,INHBA,BCL6,FOXP4,FOXO3,STK3,SOD2,RFX3,TNFAIP6,ATP11C,ZFHX3,ACVR2A,SUCO,HDAC8,PTEN,BRAF,FAM20C,TCF12,PPARD,ZFP609,ITGAV,MDM2,NFKBIZ,FRS2,ZHX2,RGCC,JAG1,PIK3R1,ATXN1,CMKLR1,NLRP3,TGFBR1,PTPN2,DISC1,RIPK2,DCSTAMP,TRAF6,PTGS2,TREM2,APOE,TENT5C,MAFB
GO:BP	positive regulation of transcription by RNA polymerase II	GO:0045944	FALSE	1.91759e-06	5.717243982754681	1315	433	53	26944	MITF,ETV6,PID1,ZEB2,MAML2,SMYD3,RREB1,HEXB,ZFP407,ELL2,NFE2L2,APP,WWOX,BCAS3,HIF1A,JAK2,IL1A,MRTFA,IFRD1,AP3B1,VEGFA,INHBA,RHOQ,ESR1,FOXO3,RFX3,MAML3,TNKS,ACVR2A,NCOA2,TCF12,PPARD,NFAT5,MED13,MET,HIVEP1,ZFP609,ARF4,GTF2F2,NFKBIZ,TNIP1,RGCC,JAG1,PIK3R1,ATXN1,NLRP3,RPS6KA5,NOD2,TRAF6,SLC11A1,NFKB1,CD40,MAFB
GO:BP	regulation of endocytosis	GO:0030100	FALSE	1.94341e-06	5.711434560380841	327	433	24	26944	CAMK1D,PTPRJ,TBC1D5,LRRK2,BTBD9,APP,MCTP1,RABGEF1,NEDD4L,NRG1,SRC,VEGFA,PTEN,IQSEC1,ITGAV,C3,FPR3,NOD2,TREM2,SLC11A1,CD14,APOE,MERTK,CD63
GO:BP	establishment of localization in cell	GO:0051649	FALSE	1.95205e-06	5.709509171437001	2018	433	70	26944	ABCA1,KPNA1,DENND1A,MYO1E,EXOC4,SLC7A2,TBC1D5,CACNA1D,RAB8B,PLEK,LRRK2,SLC1A2,BTBD9,APP,PLA2G4A,RFTN1,VTI1A,MCTP1,RABGEF1,APBA1,RFFL,HIF1A,LARGE1,NEDD4L,JAK2,MALT1,VPS13B,NRG1,SDC1,LYN,MAP4K4,SRC,RSRC1,AP3B1,MYO5A,MDFIC,STK3,KPNA4,NUP98,EXOC6B,MREG,PTEN,BRAF,PPARD,EXOC2,APOBEC1,RIC1,IQSEC1,GRAMD1B,ARF4,PSAP,MDM2,SH2B2,TEX14,PIK3R1,LYST,ATXN1,PLD1,SDC4,SCFD2,DST,NOD2,ITGAM,PTGS2,HMOX1,SLC11A1,STRA…
GO:BP	establishment of protein localization	GO:0045184	FALSE	1.99844e-06	5.699309065726439	1722	433	63	26944	GPHN,ABCA1,KPNA1,GNAQ,NOS2,DENND1A,EXOC4,TBC1D5,CACNA1D,SMYD3,RAB8B,PLEK,LRRK2,MAN1A,APP,RFTN1,VTI1A,SLC7A11,RABGEF1,APBA1,RFFL,HIF1A,LARGE1,CD38,JAK2,IL1A,MAP4K4,SRC,AP3B1,MYO5A,MDFIC,SH3KBP1,STK3,KPNA4,RFX3,NUP98,EXOC6B,TNKS,BRAF,IMMP2L,PPARD,ACSL4,ITPR1,EXOC2,APOBEC1,RIC1,ASTN2,ADAM9,ARF4,PSAP,MDM2,TRPM2,PIK3R1,HK2,SCFD2,SNX24,IRS2,PTGS2,TREM2,DENND4C,APOE,RSAD2,CD63
GO:BP	aromatic compound biosynthetic process	GO:0019438	FALSE	2.01223e-06	5.696323266998488	3973	433	112	26944	CAMK1D,TRPS1,MITF,CDK8,ETV6,PID1,TRAF3,ACSL1,FNIP2,ZEB2,MAML2,RAPGEF2,RERE,SMYD3,RREB1,HEXB,HDAC9,CREB5,ARID1B,ZFP407,ELL2,NFE2L2,APP,WWOX,JARID2,AMBRA1,FNIP1,BCAS3,SLC7A11,HIF1A,CD38,JAK2,NRG1,IL1A,DYRK1A,CDYL2,MRTFA,RYBP,IFRD1,SRC,AP3B1,VEGFA,INHBA,BCL6,FOXP4,MYO5A,CD274,RHOQ,ESR1,MDFIC,FOXO3,SOD2,ZFP516,RFX3,LIN54,NUP98,MAML3,TNKS,ZFHX3,ACVR2A,ENTPD1,NCOA2,TCF12,PPARD,NFAT5,PRDX5,MTHFD1L,ACSL4…
GO:BP	regulation of ERK1 and ERK2 cascade	GO:0070372	FALSE	2.06619e-06	5.684829017960004	328	433	24	26944	PHLPP1,RAPGEF2,APP,NRG1,IL1A,LYN,SRC,VEGFA,INHBA,ESR1,PTEN,BRAF,PDE8A,MIF,GPNMB,C3,FRS2,TNIP1,PTPN2,FPR3,NOD2,RIPK2,TREM2,APOE
GO:BP	regulation of DNA-templated transcription	GO:0006355	FALSE	2.08985e-06	5.679884421280352	3344	433	99	26944	CAMK1D,TRPS1,MITF,CDK8,ETV6,PID1,TRAF3,FNIP2,ZEB2,MAML2,RERE,SMYD3,RREB1,HEXB,HDAC9,CREB5,ARID1B,ZFP407,ELL2,NFE2L2,APP,WWOX,JARID2,AMBRA1,FNIP1,BCAS3,HIF1A,CD38,JAK2,NRG1,IL1A,DYRK1A,CDYL2,MRTFA,RYBP,IFRD1,AP3B1,VEGFA,INHBA,BCL6,FOXP4,CD274,RHOQ,ESR1,MDFIC,FOXO3,SOD2,ZFP516,RFX3,LIN54,NUP98,MAML3,TNKS,ZFHX3,ACVR2A,NCOA2,TCF12,PPARD,NFAT5,PRDX5,PDE8A,CDYL,MED13,SFMBT1,MET,HIVEP1,ZFP609,SUPT3,ARF4…
GO:BP	actin cytoskeleton organization	GO:0030036	FALSE	2.10847e-06	5.676032070613375	695	433	36	26944	FMNL2,MYO1E,ZEB2,PLEK,DIAPH2,BCAS3,PSTPIP2,EPB41L2,ELMO1,IL1A,MRTFA,CARMIL1,SRC,BCL6,PDLIM5,IQGAP2,MYO5A,RHOQ,SH3KBP1,FMN1,NOS1AP,SIPA1L1,BRAF,SPECC1L,EPB41,MET,IQSEC1,SH2B2,TRPM2,RGCC,PIK3R1,SDC4,TGFBR1,SVIL,MYO3B,BST1
GO:BP	coagulation	GO:0050817	FALSE	2.20793e-06	5.656014109554511	181	433	18	26944	GNAQ,PTPRJ,PLEK,NFE2L2,PLA2G4A,PDPN,SLC7A11,JAK2,LYN,F13A1,AP3B1,ENTPD1,TEC,PROCR,F10,PAPSS2,APOE,MERTK
GO:BP	positive regulation of protein phosphorylation	GO:0001934	FALSE	2.37124e-06	5.625024650399882	567	433	32	26944	IL31RA,PTPRJ,FNIP2,RAPGEF2,SMYD3,CD86,SLCO3A1,LRRK2,APP,FNIP1,JAK2,NRG1,LYN,SRC,ERN1,MOB3B,VEGFA,INHBA,ACVR2A,MAP2K4,BRAF,MIF,GPNMB,C3,PIK3R1,FPR3,NOD2,RIPK2,PTGS2,TREM2,CD40,CLEC4N
GO:BP	hemostasis	GO:0007599	FALSE	2.41456e-06	5.6171626848956855	182	433	18	26944	GNAQ,PTPRJ,PLEK,NFE2L2,PLA2G4A,PDPN,SLC7A11,JAK2,LYN,F13A1,AP3B1,ENTPD1,TEC,PROCR,F10,PAPSS2,APOE,MERTK
GO:BP	negative regulation of cell migration	GO:0030336	FALSE	2.44403e-06	5.611894103970486	304	433	23	26944	MITF,OSBPL8,LDLRAD4,PTPRJ,LRCH1,ZEB2,NFE2L2,MCTP1,RABGEF1,CLIC4,NRG1,SRGAP2,FOXO3,TNFAIP6,PTEN,BRAF,PPARD,MIF,RGCC,JAG1,TGFBR1,APOE,CD63
GO:BP	regulation of RNA biosynthetic process	GO:2001141	FALSE	2.45346e-06	5.610220388134004	3354	433	99	26944	CAMK1D,TRPS1,MITF,CDK8,ETV6,PID1,TRAF3,FNIP2,ZEB2,MAML2,RERE,SMYD3,RREB1,HEXB,HDAC9,CREB5,ARID1B,ZFP407,ELL2,NFE2L2,APP,WWOX,JARID2,AMBRA1,FNIP1,BCAS3,HIF1A,CD38,JAK2,NRG1,IL1A,DYRK1A,CDYL2,MRTFA,RYBP,IFRD1,AP3B1,VEGFA,INHBA,BCL6,FOXP4,CD274,RHOQ,ESR1,MDFIC,FOXO3,SOD2,ZFP516,RFX3,LIN54,NUP98,MAML3,TNKS,ZFHX3,ACVR2A,NCOA2,TCF12,PPARD,NFAT5,PRDX5,PDE8A,CDYL,MED13,SFMBT1,MET,HIVEP1,ZFP609,SUPT3,ARF4…
GO:BP	neuron differentiation	GO:0030182	FALSE	2.67006e-06	5.573479287067274	1569	433	59	26944	CAMK1D,GNAQ,EXT1,ABI1,ZEB2,RAPGEF2,RERE,HDAC9,LRRK2,HTR7,NFE2L2,APP,DIAPH2,ASAP1,HIF1A,CD38,NEDD4L,JAK2,MALT1,SLC23A2,NRG1,ALCAM,LYN,MRTFA,IFRD1,B4GALT5,MAP4K4,SRGAP2,VEGFA,INHBA,BCL6,NRP2,PDLIM5,FOXO3,SOD2,ZFHX3,PTEN,SIPA1L1,BRAF,TCF12,ACSL4,ITPR1,NTNG2,IQSEC1,C3,ARF4,PSAP,MDM2,ZHX2,JAG1,SDC4,TGFBR1,DST,DISC1,RAP1GAP2,MYO3B,LRP12,PTPRO,APOE
GO:BP	regulation of apoptotic signaling pathway	GO:2001233	FALSE	2.69368e-06	5.569653867778619	417	433	27	26944	LRRK2,NFE2L2,APP,WWOX,RFFL,HIF1A,JAK2,NRG1,MRTFA,SRC,INHBA,STK3,SOD2,CTSS,PTEN,GRINA,MIF,ITGAV,GCLC,MDM2,TGFBR1,PTPN2,BCL2L11,PTGS2,TREM2,HMOX1,IER3
GO:BP	response to oxygen levels	GO:0070482	FALSE	2.76612e-06	5.558129500157839	447	433	28	26944	NOS2,ZEB2,NFE2L2,PDPN,HIF1A,CD38,CPEB4,IL1A,SLC2A1,SRC,VEGFA,INHBA,FOXO3,SOD2,CPEB2,ACVR2A,PTEN,PPARD,BNIP3,ITPR1,MDM2,RGCC,HK2,EGLN3,CYBB,PTGS2,TREM2,HMOX1
GO:BP	regulation of RNA metabolic process	GO:0051252	FALSE	2.84592e-06	5.545777570693848	3653	433	105	26944	CAMK1D,TRPS1,MITF,CDK8,ETV6,PID1,TRAF3,FNIP2,ZEB2,MAML2,RERE,SMYD3,RREB1,HEXB,HDAC9,CREB5,ARID1B,ZFP407,ELL2,NFE2L2,APP,RBM47,WWOX,JARID2,AMBRA1,FNIP1,BCAS3,HIF1A,CD38,JAK2,NRG1,IL1A,DYRK1A,FAM172A,CDYL2,MRTFA,RYBP,IFRD1,ERN1,AP3B1,VEGFA,INHBA,BCL6,FOXP4,CD274,RHOQ,ESR1,MDFIC,FOXO3,SOD2,ZFP516,RFX3,LIN54,NUP98,MAML3,TNKS,ZFHX3,ACVR2A,NCOA2,TCF12,PPARD,NFAT5,PRDX5,PDE8A,CDYL,MED13,APOBEC1,SFMBT1,M…
GO:BP	regulation of phosphorylation	GO:0042325	FALSE	2.84906e-06	5.545297737247206	877	433	41	26944	PID1,IL31RA,PHLPP1,PTPRJ,FNIP2,RAPGEF2,SMYD3,CD86,SLCO3A1,LRRK2,APP,FNIP1,RABGEF1,JAK2,NRG1,LYN,SRC,ERN1,MOB3B,VEGFA,INHBA,ACVR2A,MAP2K4,PTEN,BRAF,MIF,GPNMB,C3,PIK3R1,ATXN1,PTPN2,FPR3,NOD2,RIPK2,IRS2,PTGS2,TREM2,BST1,CD40,PTPRO,CLEC4N
GO:BP	regulation of MAPK cascade	GO:0043408	FALSE	2.92825e-06	5.533391621732047	670	433	35	26944	PHLPP1,PTPRJ,RAPGEF2,RNF149,SASH1,APP,JAK2,NRG1,IL1A,LYN,SRC,ERN1,VEGFA,INHBA,ESR1,MDFIC,STK3,MAP2K4,PTEN,BRAF,PDE8A,MIF,GPNMB,C3,PSAP,FRS2,TNIP1,TGFBR1,PTPN2,FPR3,KSR2,NOD2,RIPK2,TREM2,APOE
GO:BP	circulatory system development	GO:0072359	FALSE	3.12165e-06	5.505615869651527	1216	433	50	26944	GNAQ,EXT1,MYO1E,AKT3,PTPRJ,ARHGAP24,RAPGEF2,HDAC9,SASH1,VAV3,NFE2L2,JARID2,PDPN,BCAS3,HIF1A,LARGE1,CLIC4,NRG1,IL1A,SGPL1,VEGFA,INHBA,NRP2,PDLIM5,FOXP4,NXN,STK3,SOD2,MAP2K4,PTEN,JAK1,IMMP2L,ITGAV,C3,MDM2,FRS2,RGCC,JAG1,HK2,TGFBR1,ANPEP,CYBB,ARHGAP22,GYS1,PTGS2,HMOX1,TIPARP,ADAM19,CD40,APOE
GO:BP	positive regulation of MAPK cascade	GO:0043410	FALSE	3.18059e-06	5.497491698216579	480	433	29	26944	PTPRJ,RAPGEF2,SASH1,APP,JAK2,NRG1,IL1A,SRC,ERN1,VEGFA,INHBA,ESR1,STK3,MAP2K4,PTEN,BRAF,PDE8A,MIF,GPNMB,C3,PSAP,FRS2,TGFBR1,FPR3,KSR2,NOD2,RIPK2,TREM2,APOE
GO:BP	negative regulation of nitrogen compound metabolic process	GO:0051172	FALSE	3.33289e-06	5.477178490531526	2219	433	74	26944	TRPS1,MITF,ETV6,PID1,NOS2,PTPRJ,FNIP2,ZEB2,RERE,RREB1,HDAC9,LRRK2,APP,RBM47,JARID2,FNIP1,RABGEF1,RFFL,HIF1A,CD38,CPEB4,NRG1,DYRK1A,DAPK1,CDYL2,LYN,RYBP,SRC,ERN1,VEGFA,BCL6,FOXP4,ESR1,MDFIC,FOXO3,NXN,CPEB2,RFX3,TNKS,ZFHX3,HDAC8,ENTPD1,PTEN,NCOA2,PPARD,PRDX5,CDYL,MIF,APOBEC1,SFMBT1,RIC1,HIVEP1,ITGAV,GCLC,MDM2,ZHX2,PIK3R1,ATXN1,TGFBR1,PTPN2,WAC,MXI1,RPS6KA5,CST7,TRAF6,SFMBT2,PTGS2,TREM2,SLC11A1,NFKB…
GO:BP	cellular response to peptide hormone stimulus	GO:0071375	FALSE	3.3444e-06	5.475681797720848	336	433	24	26944	OSBPL8,PID1,AKT3,PTPRJ,HDAC9,ARID1B,NFE2L2,JAK2,SRC,MBD5,INHBA,MYO5A,RHOQ,CPEB2,PTEN,NCOA2,GCLC,MDM2,SH2B2,PIK3R1,PTPN2,IRS2,NFKB1,DENND4C
GO:BP	cell projection organization	GO:0030030	FALSE	3.59083e-06	5.44481	1706	433	62	26944	CAMK1D,EXT1,ARHGAP24,ABI1,ZEB2,RAPGEF2,RERE,RREB1,RAB8B,PLEK,LRRK2,VAV3,HTR7,NFE2L2,APP,DIAPH2,ASAP1,PDPN,CD38,NEDD4L,JAK2,MALT1,SLC23A2,NRG1,ALCAM,LYN,MRTFA,CARMIL1,IFRD1,B4GALT5,MAP4K4,SRC,SRGAP2,VEGFA,NRP2,PDLIM5,RHOQ,RFX3,PTEN,SIPA1L1,BRAF,ACSL4,ITPR1,NTNG2,IQSEC1,ARF4,MDM2,TRPM2,PIK3R1,PLD1,SDC4,TGFBR1,DST,DISC1,RAP1GAP2,HOMER1,MYO3B,LRP12,RAPGEF6,TREM2,PTPRO,APOE
GO:BP	response to extracellular stimulus	GO:0009991	FALSE	3.72889e-06	5.428420724844938	610	433	33	26944	ABCA1,ACSL1,ZEB2,TBC1D5,LRRK2,SLC1A2,NFE2L2,AMBRA1,FNIP1,BCAS3,CPEB4,IL1A,LYN,SLC2A1,SRC,INHBA,FOXO3,SOD2,TNKS,ACVR2A,PPARD,BNIP3,GCLC,MDM2,NFKBIZ,PLD1,CYBB,BCKDHB,KYNU,NOD2,PTGS2,APOE,CHKA
GO:BP	plasma membrane bounded cell projection organization	GO:0120036	FALSE	3.73575e-06	5.4276226493286215	1666	433	61	26944	CAMK1D,EXT1,ARHGAP24,ABI1,ZEB2,RAPGEF2,RERE,RREB1,PLEK,LRRK2,VAV3,HTR7,NFE2L2,APP,DIAPH2,ASAP1,PDPN,CD38,NEDD4L,JAK2,MALT1,SLC23A2,NRG1,ALCAM,LYN,MRTFA,CARMIL1,IFRD1,B4GALT5,MAP4K4,SRC,SRGAP2,VEGFA,NRP2,PDLIM5,RHOQ,RFX3,PTEN,SIPA1L1,BRAF,ACSL4,ITPR1,NTNG2,IQSEC1,ARF4,MDM2,TRPM2,PIK3R1,PLD1,SDC4,TGFBR1,DST,DISC1,RAP1GAP2,HOMER1,MYO3B,LRP12,RAPGEF6,TREM2,PTPRO,APOE
GO:BP	regulation of protein phosphorylation	GO:0001932	FALSE	4.00252e-06	5.39767	816	433	39	26944	PID1,IL31RA,PHLPP1,PTPRJ,FNIP2,RAPGEF2,SMYD3,CD86,SLCO3A1,LRRK2,APP,FNIP1,RABGEF1,JAK2,NRG1,LYN,SRC,ERN1,MOB3B,VEGFA,INHBA,ACVR2A,MAP2K4,PTEN,BRAF,MIF,GPNMB,C3,PIK3R1,PTPN2,FPR3,NOD2,RIPK2,PTGS2,TREM2,BST1,CD40,PTPRO,CLEC4N
GO:BP	cellular response to decreased oxygen levels	GO:0036294	FALSE	4.44297e-06	5.3523269668740845	189	433	18	26944	NFE2L2,HIF1A,CPEB4,SRC,VEGFA,INHBA,FOXO3,CPEB2,ACVR2A,PTEN,PPARD,BNIP3,MDM2,RGCC,CYBB,PTGS2,TREM2,HMOX1
GO:BP	intrinsic apoptotic signaling pathway	GO:0097193	FALSE	4.85392e-06	5.313907209298794	315	433	23	26944	FNIP2,LRRK2,NFE2L2,APP,WWOX,HIF1A,JAK2,SRC,ERN1,SOD2,MAP2K4,GRINA,BNIP3,ITPR1,MIF,MDM2,PIK3R1,PTPN2,BCL2L11,PTGS2,TREM2,HMOX1,IER3
GO:BP	lipid transport	GO:0006869	FALSE	4.98091e-06	5.302691321116154	459	433	28	26944	OSBPL8,ABCA1,NOS2,ACSL1,SLCO3A1,PLA2G4A,OSBPL3,ATP8B4,VPS13B,NRG1,IL1A,SLC2A1,INHBA,ATP11C,TEX2,PPARD,ACSL4,MIF,FABP5,ITGAV,GRAMD1B,PSAP,IRS2,PTGS2,TREM2,PTGES,STRA6L,APOE
GO:BP	signal release	GO:0023061	FALSE	5.52683e-06	5.257524244482987	587	433	32	26944	ABCA1,GNAQ,NOS2,CACNA1D,RAB8B,LRRK2,HTR7,PLA2G4A,MCTP1,HIF1A,CD38,JAK2,NRG1,IL1A,LYN,MAP4K4,INHBA,MYO5A,KPNA4,RFX3,ACVR2A,ENTPD1,BRAF,PPARD,ACSL4,ITPR1,MIF,SLC16A10,TRPM2,IRS2,PTGS2,PTGES
GO:BP	positive regulation of adaptive immune response based on somatic recombination of immune receptors built from immunoglobulin superfamily domains	GO:0002824	FALSE	5.63868e-06	5.248822351749691	148	433	16	26944	PLA2G4A,JAK2,MALT1,CD274,C3,NFKBIZ,H2-M2,NLRP3,NOD2,RIPK2,TRAF6,TREM2,SLC11A1,CD40,RSAD2,CLEC4N
GO:BP	negative regulation of cell motility	GO:2000146	FALSE	6.18234e-06	5.208846786122054	319	433	23	26944	MITF,OSBPL8,LDLRAD4,PTPRJ,LRCH1,ZEB2,NFE2L2,MCTP1,RABGEF1,CLIC4,NRG1,SRGAP2,FOXO3,TNFAIP6,PTEN,BRAF,PPARD,MIF,RGCC,JAG1,TGFBR1,APOE,CD63
GO:BP	positive regulation of catabolic process	GO:0009896	FALSE	6.30327e-06	5.20043	526	433	30	26944	FBXL5,LRRK2,APP,AMBRA1,HIF1A,RNF217,NEDD4L,DAPK1,CBLB,ERN1,FBXO11,ARIH1,FOXO3,PTEN,BNIP3,GCLC,MDM2,BCL2L11,WAC,DISC1,RNF19B,NOD2,RIPK2,IRS2,TREM2,HMOX1,TIPARP,APOE,IER3,ZC3HAV1
GO:BP	organic substance metabolic process	GO:0071704	FALSE	7.10225e-06	5.1486	13942	433	284	26944	CAMK1D,TRPS1,MITF,CDK8,GPHN,ABCA1,CERS6,ETV6,PID1,IL31RA,FBXL5,NOS2,PHLPP1,TRAF3,EXT1,AKT3,ACSL1,FBXL17,PTPRJ,AFF1,FNIP2,ZEB2,MAN2A1,MAML2,PDE7B,RAPGEF2,RERE,AOAH,RNF149,SMYD3,SND1,FARS2,RREB1,HEXB,PLCL2,CD86,HDAC9,CREB5,SLCO3A1,PLEK,ATG10,LRRK2,ARID1B,TANK,ZFP407,SASH1,SLC1A2,ELL2,ARG2,SIK3,PARP8,NFE2L2,BTBD9,IRAK2,MAN1A,TACO1,APP,PLA2G4A,ST3GAL1,RBM47,WWOX,JARID2,SGMS2,RFTN1,PLA2G7,PDPN,AMBRA1,…
GO:BP	heterocycle biosynthetic process	GO:0018130	FALSE	7.33733e-06	5.134462154060918	3963	433	110	26944	CAMK1D,TRPS1,MITF,CDK8,GPHN,ETV6,PID1,TRAF3,ACSL1,FNIP2,ZEB2,MAML2,RERE,SMYD3,RREB1,HEXB,HDAC9,CREB5,ARID1B,ZFP407,ELL2,NFE2L2,APP,WWOX,JARID2,AMBRA1,FNIP1,BCAS3,HIF1A,CD38,JAK2,NRG1,IL1A,DYRK1A,CDYL2,MRTFA,RYBP,IFRD1,SRC,AP3B1,VEGFA,INHBA,BCL6,FOXP4,CD274,RHOQ,ESR1,MDFIC,FOXO3,SOD2,ZFP516,RFX3,LIN54,NUP98,MAML3,TNKS,ZFHX3,ACVR2A,ENTPD1,NCOA2,TCF12,PPARD,NFAT5,PRDX5,MTHFD1L,ACSL4,PDE8A,CDYL,MED13…
GO:BP	negative regulation of locomotion	GO:0040013	FALSE	7.50307e-06	5.12476	350	433	24	26944	MITF,OSBPL8,LDLRAD4,PTPRJ,LRCH1,ZEB2,NFE2L2,MCTP1,RABGEF1,CLIC4,NRG1,SRGAP2,FOXO3,TNFAIP6,PTEN,BRAF,PPARD,MIF,RGCC,JAG1,TGFBR1,PTPN2,APOE,CD63
GO:BP	response to hypoxia	GO:0001666	FALSE	7.50307e-06	5.12476	350	433	24	26944	NOS2,NFE2L2,HIF1A,CD38,IL1A,SLC2A1,SRC,VEGFA,INHBA,FOXO3,SOD2,CPEB2,PTEN,PPARD,BNIP3,ITPR1,MDM2,RGCC,HK2,EGLN3,CYBB,PTGS2,TREM2,HMOX1
GO:BP	blood circulation	GO:0008015	FALSE	7.508e-06	5.124475857198851	530	433	30	26944	SLC8A1,GNAQ,NOS2,EXT1,PTPRJ,ZEB2,CACNA1D,HTR7,APP,HIF1A,CD38,NEDD4L,JAK2,PDE4B,SRC,VEGFA,SOD2,NOS1AP,IMMP2L,PPARD,GCLC,MDM2,PIK3R1,GCH1,PTGS2,HMOX1,TBXAS1,PTPRO,APOE,IER3
GO:BP	regulation of leukocyte apoptotic process	GO:2000106	FALSE	7.54819e-06	5.122157023534937	111	433	14	26944	RAPGEF2,ARG2,ST3GAL1,FNIP1,SLC7A11,HIF1A,LYN,CD274,PTEN,MIF,BCL2L11,NOD2,IRS2,MERTK
GO:BP	tissue remodeling	GO:0048771	FALSE	7.95645e-06	5.099280701411187	196	433	18	26944	MITF,NOS2,EXT1,TNS3,HIF1A,CD38,IL1A,SRC,VEGFA,CTSS,SUCO,GPNMB,ITGAV,MDM2,JAG1,DCSTAMP,TRAF6,NFKB1
GO:BP	regulation of leukocyte cell-cell adhesion	GO:1903037	FALSE	8.15271e-06	5.088697909267428	380	433	25	26944	CD86,ARID1B,ARG2,AMBRA1,JAK2,MALT1,IL1A,CBLB,AP3B1,BCL6,CD274,FOXO3,HSPH1,PTEN,NFAT5,GPNMB,ZFP609,NFKBIZ,PAG1,H2-M2,SDC4,NLRP3,PTPN2,RIPK2,TRAF6
GO:BP	positive regulation of phosphorylation	GO:0042327	FALSE	8.31282e-06	5.08025	597	433	32	26944	IL31RA,PTPRJ,FNIP2,RAPGEF2,SMYD3,CD86,SLCO3A1,LRRK2,APP,FNIP1,JAK2,NRG1,LYN,SRC,ERN1,MOB3B,VEGFA,INHBA,ACVR2A,MAP2K4,BRAF,MIF,GPNMB,C3,PIK3R1,FPR3,NOD2,RIPK2,PTGS2,TREM2,CD40,CLEC4N
GO:BP	homeostasis of number of cells	GO:0048872	FALSE	8.59769e-06	5.065618233940807	381	433	25	26944	EXT1,AKT3,SLC7A11,HIF1A,JAK2,LYN,PDE4B,AP3B1,VEGFA,INHBA,BCL6,FOXO3,ACVR2A,PRDX5,MIF,P2RY14,NFKBIZ,SH2B2,PTPN2,BCL2L11,NOD2,HMOX1,ALAS1,MAFB,MERTK
GO:BP	response to organic cyclic compound	GO:0014070	FALSE	8.63552e-06	5.063711704321235	1137	433	47	26944	ABCA1,GNAQ,NOS2,ACSL1,RAPGEF2,SMYD3,LRRK2,SLC1A2,HTR7,APP,SAA3,RFTN1,SLC7A11,CD38,JAK2,IL1A,SDC1,LYN,SRC,INHBA,ESR1,FOXO3,SOD2,HDAC8,BRAF,NCOA2,ITPR1,GRAMD1B,GCLC,MDM2,NFKBIZ,TRPM2,PIK3R1,NLRP3,TGFBR1,CYBB,HOMER1,BCKDHB,KYNU,NOD2,RIPK2,ITGAM,PTGS2,TIPARP,NFKB1,ALAS1,ZC3HAV1
GO:BP	regulation of T cell activation	GO:0050863	FALSE	9.06529e-06	5.042618402339246	382	433	25	26944	CD86,ARID1B,ARG2,AMBRA1,JAK2,MALT1,IL1A,CBLB,AP3B1,BCL6,CD274,FOXO3,HSPH1,PTEN,BRAF,GPNMB,ZFP609,NFKBIZ,PAG1,H2-M2,SDC4,NLRP3,PTPN2,RIPK2,TRAF6
GO:BP	lymphocyte proliferation	GO:0046651	FALSE	9.37899e-06	5.027844140031711	354	433	24	26944	PLCL2,CD86,VAV3,ARG2,CD38,JAK2,MALT1,IL1A,CBLB,LYN,BCL6,CD274,PTEN,MIF,GPNMB,NFKBIZ,H2-M2,SDC4,CFB,RIPK2,TRAF6,IRS2,SLC11A1,CD40
GO:BP	regulation of body fluid levels	GO:0050878	FALSE	9.37899e-06	5.027844140031711	354	433	24	26944	GNAQ,EXT1,PTPRJ,PLEK,NFE2L2,PLA2G4A,PDPN,SLC7A11,HIF1A,JAK2,LYN,F13A1,AP3B1,VEGFA,ENTPD1,TEC,NFAT5,PROCR,HK2,F10,PAPSS2,PTPRO,APOE,MERTK
GO:BP	organic cyclic compound biosynthetic process	GO:1901362	FALSE	9.49942e-06	5.022302868130005	4131	433	113	26944	CAMK1D,TRPS1,MITF,CDK8,GPHN,ETV6,PID1,TRAF3,ACSL1,FNIP2,ZEB2,MAML2,RAPGEF2,RERE,SMYD3,RREB1,HEXB,HDAC9,CREB5,ARID1B,ZFP407,ELL2,NFE2L2,APP,WWOX,JARID2,AMBRA1,FNIP1,BCAS3,SLC7A11,HIF1A,CD38,JAK2,NRG1,IL1A,DYRK1A,CDYL2,MRTFA,RYBP,IFRD1,SRC,AP3B1,VEGFA,INHBA,BCL6,FOXP4,MYO5A,CD274,RHOQ,ESR1,MDFIC,FOXO3,SOD2,ZFP516,RFX3,LIN54,NUP98,MAML3,TNKS,ZFHX3,ACVR2A,ENTPD1,NCOA2,TCF12,PPARD,NFAT5,PRDX5,MTHFD1L,…
GO:BP	small molecule metabolic process	GO:0044281	FALSE	9.64513e-06	5.01569	1836	433	64	26944	ABCA1,PID1,NOS2,ACSL1,MAN2A1,PDE7B,AOAH,HEXB,PLEK,LRRK2,ARG2,APP,PLA2G4A,ST3GAL1,PLA2G7,PDPN,SLC7A11,HIF1A,SLC23A2,CARMIL1,PDE4B,SRC,SGPL1,CLYBL,MYO5A,RHOQ,GPD2,LPCAT2,ENTPD1,PTEN,NCOA2,PPARD,PRDX5,MTHFD1L,ACSL4,PDE8A,MIF,APOBEC1,FABP5,C3,GCLC,AIG1,GLS,PIK3R1,HK2,PTPN2,AHCYL2,TXNRD1,ACPP,BCKDHB,KYNU,RBKS,GCH1,AGPS,PAPSS2,IRS2,PTGS2,DPYS,TREM2,TBXAS1,PTGES,APOE,IER3,CHKA
GO:BP	negative regulation of cellular metabolic process	GO:0031324	FALSE	9.97512e-06	5.001081713463877	3108	433	92	26944	TRPS1,MITF,CDK8,ETV6,PID1,NOS2,AKT3,PTPRJ,FNIP2,ZEB2,RAPGEF2,RERE,SND1,RREB1,HDAC9,PLEK,LRRK2,ARG2,APP,RBM47,JARID2,FNIP1,RABGEF1,HIF1A,CD38,CPEB4,ZCCHC7,NRG1,DYRK1A,DAPK1,FAM172A,CDYL2,LYN,RYBP,SRC,ERN1,VEGFA,BCL6,FOXP4,CD274,ESR1,MDFIC,FOXO3,SRGN,CPEB2,RFX3,TNKS,ZFHX3,HDAC8,ENTPD1,PTEN,NCOA2,PPARD,PRDX5,BNIP3,CDYL,MIF,APOBEC1,SFMBT1,HIVEP1,GPNMB,ITGAV,GCLC,MDM2,ZHX2,RGCC,ATXN1,HK2,CMKLR1,NLRP3,…
GO:BP	cell-substrate adhesion	GO:0031589	FALSE	1.04732e-05	4.9799214610689795	356	433	24	26944	PTPRJ,RREB1,PDPN,JAK2,CARMIL1,SRC,VEGFA,BCL6,FMN1,PTEN,BRAF,DOCK1,PPARD,ADAM9,PEAK1,ITGAV,JAG1,PIK3R1,SDC4,BCL2L11,DISC1,BST1,MERTK,CD63
GO:BP	B cell activation	GO:0042113	FALSE	1.07206e-05	4.96978	301	433	22	26944	PTPRJ,PLCL2,CD86,VAV3,ST3GAL1,FNIP1,CD38,TPD52,MALT1,LYN,BCL6,SH3KBP1,ATP11C,PTEN,MIF,NFKBIZ,PIK3R1,PTPN2,CFB,NOD2,IRS2,CD40
GO:BP	cellular response to chemical stress	GO:0062197	FALSE	1.11306e-05	4.953482614536861	329	433	23	26944	LRRC8C,LRRK2,NFE2L2,SLC7A11,LRRC8D,DAPK1,SLC2A1,SRC,ERN1,FOXO3,SOD2,MAP2K4,PRDX5,BNIP3,MET,PSAP,MDM2,TRPM2,NLRP3,MGST1,GCH1,PTGS2,MSRA
GO:BP	postsynapse organization	GO:0099173	TRUE	1.1772e-05	4.929148248208045	250	433	20	26944	GPHN,LRRK2,APP,ASAP1,SLC7A11,NRP2,PDLIM5,SRGN,NOS1AP,PTEN,SIPA1L1,NTNG2,ARF4,STK38L,DISC1,RPS6KA5,HOMER1,ARHGAP22,TREM2,APOE
GO:BP	response to tumor necrosis factor	GO:0034612	FALSE	1.1772e-05	4.929148248208045	250	433	20	26944	PID1,NOS2,TRAF3,LRRK2,TANK,NFE2L2,RFFL,JAK2,FOXO3,MAP4K3,ADAM9,PTPN2,DCSTAMP,GCH1,TRAF6,PTGS2,UBD,NFKB1,CD40,CD14
GO:BP	regulation of multicellular organismal development	GO:2000026	FALSE	1.17924e-05	4.928397454742746	1550	433	57	26944	SLC8A1,MITF,AKT3,ZEB2,MAN2A1,RAPGEF2,ARID1B,SASH1,NFE2L2,JARID2,SGMS2,AMBRA1,HIF1A,MALT1,NRG1,IL1A,LYN,IFRD1,B4GALT5,AP3B1,VEGFA,INHBA,BCL6,FOXP4,FOXO3,SRGN,RFX3,TNFAIP6,ATP11C,ACVR2A,PTEN,BRAF,JAK1,FAM20C,PPARD,ZFP609,C3,NFKBIZ,RGCC,JAG1,PIK3R1,ATXN1,HK2,NLRP3,TGFBR1,PTPN2,DISC1,CYBB,RIPK2,DCSTAMP,CST7,TRAF6,TREM2,HMOX1,CD40,APOE,MAFB
GO:BP	antigen receptor-mediated signaling pathway	GO:0050851	FALSE	1.2028e-05	4.919804958221081	178	433	17	26944	PTPRJ,PLCL2,VAV3,RFTN1,CD38,MALT1,CBLB,LYN,PDE4B,TEC,BRAF,NFKBIZ,SH2B2,PTPN2,RIPK2,TRAF6,NFKB1
GO:BP	epithelium development	GO:0060429	FALSE	1.27773e-05	4.893559465043788	1309	433	51	26944	IL31RA,EXT1,MYO1E,ARHGAP24,ABI1,ZEB2,RAPGEF2,RREB1,ARG2,PDPN,AMBRA1,SLC7A11,HIF1A,CLIC4,JAK2,NRG1,IL1A,SDC1,MRTFA,SRC,FNDC3A,AP3B1,VEGFA,INHBA,FOXP4,MYO5A,ESR1,STK3,RFX3,FMN1,PTEN,SPECC1L,FAM20C,MTHFD1L,MET,ASTN2,ADAM9,C3,PSAP,NFKBIZ,FRS2,JAG1,SDC4,TGFBR1,MYO3B,TRAF6,PTGS2,PTPRO,MAFB,CTSB,CD63
GO:BP	mononuclear cell proliferation	GO:0032943	FALSE	1.30279e-05	4.885127220279468	360	433	24	26944	PLCL2,CD86,VAV3,ARG2,CD38,JAK2,MALT1,IL1A,CBLB,LYN,BCL6,CD274,PTEN,MIF,GPNMB,NFKBIZ,H2-M2,SDC4,CFB,RIPK2,TRAF6,IRS2,SLC11A1,CD40
GO:BP	response to nutrient levels	GO:0031667	FALSE	1.33852e-05	4.8733739976001536	576	433	31	26944	ABCA1,ACSL1,ZEB2,TBC1D5,LRRK2,NFE2L2,AMBRA1,FNIP1,BCAS3,CPEB4,IL1A,SLC2A1,SRC,INHBA,FOXO3,SOD2,TNKS,ACVR2A,PPARD,BNIP3,GCLC,MDM2,NFKBIZ,PLD1,CYBB,BCKDHB,KYNU,NOD2,PTGS2,APOE,CHKA
GO:BP	muscle cell proliferation	GO:0033002	FALSE	1.34957e-05	4.869805574920385	278	433	21	26944	KPNA1,GNAQ,JARID2,HIF1A,JAK2,NRG1,SRC,ERN1,VEGFA,ESR1,SOD2,PTEN,PPARD,MDM2,FRS2,PIK3R1,TGFBR1,TRAF6,PTGS2,HMOX1,APOE
GO:BP	T cell activation	GO:0042110	FALSE	1.4489e-05	4.838962357851842	611	433	32	26944	CD86,ARID1B,ARG2,CLEC4D,AMBRA1,JAK2,MALT1,IL1A,CBLB,AP3B1,BCL6,CD274,FOXO3,HSPH1,CLEC4E,PTEN,BRAF,GPNMB,ZFP609,ITGAV,PSAP,NFKBIZ,PAG1,H2-M2,SDC4,NLRP3,PTPN2,RIPK2,TRAF6,SLC11A1,MAFB,RSAD2
GO:BP	positive regulation of ERK1 and ERK2 cascade	GO:0070374	FALSE	1.46529e-05	4.83408	228	433	19	26944	RAPGEF2,APP,NRG1,IL1A,SRC,VEGFA,INHBA,ESR1,PTEN,BRAF,PDE8A,MIF,GPNMB,C3,FPR3,NOD2,RIPK2,TREM2,APOE
GO:BP	DNA-templated transcription	GO:0006351	FALSE	1.49483e-05	4.8254084551981276	3471	433	99	26944	CAMK1D,TRPS1,MITF,CDK8,ETV6,PID1,TRAF3,FNIP2,ZEB2,MAML2,RERE,SMYD3,RREB1,HEXB,HDAC9,CREB5,ARID1B,ZFP407,ELL2,NFE2L2,APP,WWOX,JARID2,AMBRA1,FNIP1,BCAS3,HIF1A,CD38,JAK2,NRG1,IL1A,DYRK1A,CDYL2,MRTFA,RYBP,IFRD1,AP3B1,VEGFA,INHBA,BCL6,FOXP4,CD274,RHOQ,ESR1,MDFIC,FOXO3,SOD2,ZFP516,RFX3,LIN54,NUP98,MAML3,TNKS,ZFHX3,ACVR2A,NCOA2,TCF12,PPARD,NFAT5,PRDX5,PDE8A,CDYL,MED13,SFMBT1,MET,HIVEP1,ZFP609,SUPT3,ARF4…
GO:BP	positive regulation of phosphate metabolic process	GO:0045937	FALSE	1.53019e-05	4.815253452137457	680	433	34	26944	PID1,IL31RA,PTPRJ,FNIP2,RAPGEF2,SMYD3,CD86,SLCO3A1,LRRK2,APP,AMBRA1,FNIP1,JAK2,NRG1,LYN,SRC,ERN1,MOB3B,VEGFA,INHBA,ACVR2A,MAP2K4,BRAF,MIF,GPNMB,C3,PIK3R1,FPR3,NOD2,RIPK2,PTGS2,TREM2,CD40,CLEC4N
GO:BP	positive regulation of phosphorus metabolic process	GO:0010562	FALSE	1.53019e-05	4.815253452137457	680	433	34	26944	PID1,IL31RA,PTPRJ,FNIP2,RAPGEF2,SMYD3,CD86,SLCO3A1,LRRK2,APP,AMBRA1,FNIP1,JAK2,NRG1,LYN,SRC,ERN1,MOB3B,VEGFA,INHBA,ACVR2A,MAP2K4,BRAF,MIF,GPNMB,C3,PIK3R1,FPR3,NOD2,RIPK2,PTGS2,TREM2,CD40,CLEC4N
GO:BP	leukocyte proliferation	GO:0070661	FALSE	1.77544e-05	4.750694591044695	395	433	25	26944	PLCL2,CD86,VAV3,ARG2,CD38,JAK2,MALT1,IL1A,CBLB,LYN,BCL6,CD274,PTEN,MIF,GPNMB,NFKBIZ,H2-M2,SDC4,CFB,RIPK2,TRAF6,IRS2,TREM2,SLC11A1,CD40
GO:BP	regulation of catabolic process	GO:0009894	FALSE	1.82375e-05	4.739035397659845	973	433	42	26944	FBXL5,NOS2,LRRK2,APP,RBM47,AMBRA1,UVRAG,HIF1A,RNF217,NEDD4L,NRG1,DAPK1,CBLB,RYBP,ERN1,FBXO11,VEGFA,ARIH1,FOXO3,DRAM1,PTEN,BNIP3,APOBEC1,RIC1,GCLC,MDM2,STK38L,BCL2L11,WAC,DISC1,RNF19B,NOD2,RIPK2,IRS2,TREM2,HMOX1,TIPARP,SLC11A1,APOE,IER3,TENT5C,ZC3HAV1
GO:BP	cellular response to oxygen levels	GO:0071453	FALSE	1.89059e-05	4.723402674388267	207	433	18	26944	NFE2L2,HIF1A,CPEB4,SRC,VEGFA,INHBA,FOXO3,CPEB2,ACVR2A,PTEN,PPARD,BNIP3,MDM2,RGCC,CYBB,PTGS2,TREM2,HMOX1
GO:BP	vasculature development	GO:0001944	FALSE	2.01759e-05	4.695166996576812	793	433	37	26944	MYO1E,AKT3,PTPRJ,ARHGAP24,RAPGEF2,HDAC9,SASH1,VAV3,NFE2L2,PDPN,BCAS3,HIF1A,LARGE1,CLIC4,IL1A,SGPL1,VEGFA,NRP2,SOD2,PTEN,JAK1,IMMP2L,ITGAV,C3,MDM2,RGCC,JAG1,HK2,TGFBR1,ANPEP,CYBB,ARHGAP22,PTGS2,HMOX1,TIPARP,CD40,APOE
GO:BP	RNA biosynthetic process	GO:0032774	FALSE	2.10134e-05	4.677503953537215	3494	433	99	26944	CAMK1D,TRPS1,MITF,CDK8,ETV6,PID1,TRAF3,FNIP2,ZEB2,MAML2,RERE,SMYD3,RREB1,HEXB,HDAC9,CREB5,ARID1B,ZFP407,ELL2,NFE2L2,APP,WWOX,JARID2,AMBRA1,FNIP1,BCAS3,HIF1A,CD38,JAK2,NRG1,IL1A,DYRK1A,CDYL2,MRTFA,RYBP,IFRD1,AP3B1,VEGFA,INHBA,BCL6,FOXP4,CD274,RHOQ,ESR1,MDFIC,FOXO3,SOD2,ZFP516,RFX3,LIN54,NUP98,MAML3,TNKS,ZFHX3,ACVR2A,NCOA2,TCF12,PPARD,NFAT5,PRDX5,PDE8A,CDYL,MED13,SFMBT1,MET,HIVEP1,ZFP609,SUPT3,ARF4…
GO:BP	cellular response to hypoxia	GO:0071456	FALSE	2.10316e-05	4.677126865037115	162	433	16	26944	NFE2L2,HIF1A,SRC,VEGFA,INHBA,FOXO3,CPEB2,PTEN,PPARD,BNIP3,MDM2,RGCC,CYBB,PTGS2,TREM2,HMOX1
GO:BP	regulation of anatomical structure morphogenesis	GO:0022603	FALSE	2.14726e-05	4.668114878024028	904	433	40	26944	FMNL2,AKT3,ZEB2,RAPGEF2,RREB1,HEXB,LRRK2,SASH1,NFE2L2,PDPN,HIF1A,NEDD4L,EPB41L2,SLC23A2,IL1A,IFRD1,SRC,VEGFA,PDLIM5,RHOQ,ESR1,SH3KBP1,PTEN,SIPA1L1,BRAF,JAK1,EPB41,BNIP3,DDHD1,NTNG2,C3,FRS2,RGCC,JAG1,HK2,DISC1,CYBB,HMOX1,CD40,APOE
GO:BP	negative regulation of intracellular signal transduction	GO:1902532	FALSE	2.24189e-05	4.649385207585972	556	433	30	26944	LDLRAD4,PHLPP1,PTPRJ,ARHGAP24,TNS3,RNF149,LRRK2,TANK,NFE2L2,FNIP1,RABGEF1,RFFL,HIF1A,DYRK1A,LYN,SRC,BCL6,ESR1,SOD2,PTEN,GRINA,ITPR1,MIF,MET,MDM2,TNIP1,NLRP3,PTPN2,PTGS2,TREM2
GO:BP	extrinsic apoptotic signaling pathway	GO:0097191	FALSE	2.24292e-05	4.649186836721716	234	433	19	26944	APP,WWOX,RFFL,JAK2,NRG1,IL1A,DAPK1,SRC,INHBA,FOXO3,STK3,PTEN,ITGAV,GCLC,NFKBIZ,PIK3R1,TGFBR1,BCL2L11,HMOX1
GO:BP	adaptive immune response	GO:0002250	FALSE	2.52976e-05	4.59692	592	433	31	26944	CD86,ARG2,PLA2G4A,RFTN1,CLEC4D,JAK2,MALT1,ALCAM,LYN,VEGFA,BCL6,CD274,CTSS,TEC,MIF,C3,NFKBIZ,PAG1,H2-M2,JAG1,NLRP3,RNF19B,CFB,NOD2,RIPK2,TRAF6,TREM2,SLC11A1,CD40,RSAD2,CLEC4N
GO:BP	myeloid leukocyte migration	GO:0097529	FALSE	2.57704e-05	4.588878675483609	236	433	19	26944	CAMK1D,PTPRJ,VAV3,APP,PLA2G7,RABGEF1,IL1A,LYN,PDE4B,VEGFA,TNFAIP6,MIF,PIK3R1,CMKLR1,FPR3,NOD2,TREM2,BST1,PTPRO
GO:BP	regulation of small GTPase mediated signal transduction	GO:0051056	FALSE	2.95657e-05	4.529211790259924	238	433	19	26944	ABCA1,DENND1A,ARHGAP24,TNS3,RABGEF1,CYTH1,NRG1,SRC,BCL6,RALGPS1,SIPA1L1,MET,IQSEC1,ITGAV,SH2B2,DENND4A,RAP1GAP2,DENND4C,APOE
GO:BP	leukocyte apoptotic process	GO:0071887	FALSE	2.97564e-05	4.526419724677443	144	433	15	26944	RAPGEF2,ARG2,ST3GAL1,FNIP1,SLC7A11,HIF1A,LYN,CD274,PTEN,MIF,NFKBIZ,BCL2L11,NOD2,IRS2,MERTK
GO:BP	regulation of glucose transmembrane transport	GO:0010827	FALSE	3.17406e-05	4.498384832003033	86	433	12	26944	OSBPL8,PID1,SLC1A2,NFE2L2,RHOQ,ESR1,BRAF,FABP5,C3,SH2B2,HK2,IRS2
GO:BP	fatty acid transport	GO:0015908	FALSE	3.23166e-05	4.490573901314336	124	433	14	26944	NOS2,ACSL1,SLCO3A1,PLA2G4A,IL1A,SLC2A1,PPARD,ACSL4,MIF,FABP5,IRS2,PTGS2,PTGES,APOE
GO:BP	regulation of smooth muscle cell proliferation	GO:0048660	FALSE	3.48265e-05	4.458090757465654	191	433	17	26944	GNAQ,HIF1A,JAK2,SRC,ERN1,VEGFA,ESR1,SOD2,PTEN,PPARD,MDM2,FRS2,PIK3R1,TRAF6,PTGS2,HMOX1,APOE
GO:BP	prostaglandin secretion	GO:0032310	FALSE	4.06382e-05	4.391065653613732	20	433	7	26944	NOS2,PLA2G4A,IL1A,ACSL4,MIF,PTGS2,PTGES
GO:BP	nucleobase-containing compound biosynthetic process	GO:0034654	FALSE	4.16079e-05	4.3808241883075905	3888	433	106	26944	CAMK1D,TRPS1,MITF,CDK8,ETV6,PID1,TRAF3,ACSL1,FNIP2,ZEB2,MAML2,RERE,SMYD3,RREB1,HEXB,HDAC9,CREB5,ARID1B,ZFP407,ELL2,NFE2L2,APP,WWOX,JARID2,AMBRA1,FNIP1,BCAS3,HIF1A,CD38,JAK2,NRG1,IL1A,DYRK1A,CDYL2,MRTFA,RYBP,IFRD1,SRC,AP3B1,VEGFA,INHBA,BCL6,FOXP4,CD274,RHOQ,ESR1,MDFIC,FOXO3,SOD2,ZFP516,RFX3,LIN54,NUP98,MAML3,TNKS,ZFHX3,ACVR2A,ENTPD1,NCOA2,TCF12,PPARD,NFAT5,PRDX5,ACSL4,PDE8A,CDYL,MED13,SFMBT1,MET,H…
GO:BP	reactive oxygen species metabolic process	GO:0072593	FALSE	4.42641e-05	4.353948396589694	244	433	19	26944	PID1,NOS2,LRRK2,ARG2,NFE2L2,APP,HIF1A,FOXO3,SOD2,IMMP2L,PRDX5,BNIP3,ARF4,HK2,TXNRD1,CYBB,ITGAM,GCH1,IER3
GO:BP	regulation of transmembrane transport	GO:0034762	FALSE	5.19055e-05	4.284786542529378	417	433	25	26944	OSBPL8,PID1,ACSL1,CACNA1D,SESTD1,SLC1A2,ARG2,NFE2L2,NEDD4L,DAPK1,LYN,PDE4B,FBXO11,RHOQ,ESR1,CTSS,BRAF,FABP5,C3,SH2B2,HK2,HOMER1,IRS2,TREM2,CD63
GO:BP	monosaccharide transmembrane transport	GO:0015749	FALSE	5.3884e-05	4.268540217862524	129	433	14	26944	OSBPL8,PID1,SLC1A2,NFE2L2,SLC23A2,SLC2A1,RHOQ,ESR1,BRAF,FABP5,C3,SH2B2,HK2,IRS2
GO:BP	regulation of cell-substrate adhesion	GO:0010810	FALSE	5.63445e-05	4.249148826895497	222	433	18	26944	PTPRJ,RREB1,PDPN,JAK2,CARMIL1,SRC,VEGFA,BCL6,FMN1,PTEN,BRAF,DOCK1,PEAK1,JAG1,PIK3R1,SDC4,DISC1,BST1
GO:BP	regulation of system process	GO:0044057	FALSE	5.83941e-05	4.233631304700816	614	433	31	26944	SLC8A1,CACNA1D,RAB8B,LRRK2,HTR7,ARG2,APP,JARID2,HIF1A,CD38,JAK2,NRG1,PDE4B,SRC,INHBA,FOXO3,NOS1AP,ACVR2A,PTEN,EPB41,FABP5,MDM2,GLS,PIK3R1,ACPP,GCH1,CST7,PTGS2,TBXAS1,PTPRO,APOE
GO:BP	neuron projection development	GO:0031175	FALSE	5.92684e-05	4.227177129676561	1131	433	45	26944	CAMK1D,EXT1,ABI1,ZEB2,RAPGEF2,RERE,LRRK2,HTR7,NFE2L2,APP,DIAPH2,ASAP1,CD38,NEDD4L,JAK2,MALT1,SLC23A2,NRG1,ALCAM,LYN,MRTFA,IFRD1,B4GALT5,MAP4K4,SRGAP2,VEGFA,NRP2,PDLIM5,PTEN,SIPA1L1,BRAF,ACSL4,ITPR1,NTNG2,IQSEC1,ARF4,MDM2,SDC4,DST,DISC1,RAP1GAP2,MYO3B,LRP12,PTPRO,APOE
GO:BP	post-translational protein modification	GO:0043687	FALSE	6.07157e-05	4.216699099577099	939	433	40	26944	CDK8,FBXL5,TRAF3,FBXL17,RNF149,ATG10,LRRK2,TANK,SASH1,PARP8,NFE2L2,AMBRA1,RFFL,HIF1A,LARGE1,RNF217,NEDD4L,JAK2,CBLB,BABAM2,FBXO11,ARIH1,NSMCE2,NXN,TNKS,HDAC8,PTEN,GCLC,MDM2,TNIP1,SPSB1,TGFBR1,RPS6KA5,RNF19B,RNF128,NOD2,RIPK2,TRAF6,UBE2Q2,UBD
GO:BP	lipopolysaccharide-mediated signaling pathway	GO:0031663	FALSE	6.46604e-05	4.1893615995640126	58	433	10	26944	SASH1,IRAK2,MALT1,LYN,MIF,RIPK2,TRAF6,TREM2,CD14,ACOD1
GO:BP	primary metabolic process	GO:0044238	FALSE	6.48331e-05	4.1882	12727	433	261	26944	CAMK1D,TRPS1,MITF,CDK8,GPHN,ABCA1,CERS6,ETV6,PID1,IL31RA,FBXL5,NOS2,PHLPP1,TRAF3,EXT1,AKT3,ACSL1,FBXL17,PTPRJ,FNIP2,ZEB2,MAN2A1,MAML2,PDE7B,RAPGEF2,RERE,AOAH,RNF149,SMYD3,SND1,FARS2,RREB1,HEXB,PLCL2,CD86,HDAC9,CREB5,SLCO3A1,PLEK,ATG10,LRRK2,ARID1B,TANK,ZFP407,SASH1,ELL2,ARG2,SIK3,PARP8,NFE2L2,IRAK2,MAN1A,TACO1,APP,PLA2G4A,ST3GAL1,RBM47,WWOX,JARID2,SGMS2,PLA2G7,PDPN,AMBRA1,FNIP1,BCAS3,SLC7A11,RABG…
GO:BP	smooth muscle cell proliferation	GO:0048659	FALSE	6.90775e-05	4.160663672649056	200	433	17	26944	GNAQ,HIF1A,JAK2,SRC,ERN1,VEGFA,ESR1,SOD2,PTEN,PPARD,MDM2,FRS2,PIK3R1,TRAF6,PTGS2,HMOX1,APOE
GO:BP	lymphocyte differentiation	GO:0030098	FALSE	7.12852e-05	4.147000920114166	455	433	26	26944	PTPRJ,PLCL2,ARID1B,ST3GAL1,CLEC4D,AMBRA1,FNIP1,TPD52,MALT1,IL1A,AP3B1,BCL6,FOXO3,ATP11C,CLEC4E,BRAF,ZFP609,PSAP,NFKBIZ,PIK3R1,NLRP3,PTPN2,RIPK2,MAFB,MERTK,RSAD2
GO:BP	prostaglandin transport	GO:0015732	FALSE	7.44973e-05	4.127859736102845	32	433	8	26944	NOS2,SLCO3A1,PLA2G4A,IL1A,ACSL4,MIF,PTGS2,PTGES
GO:BP	blood vessel morphogenesis	GO:0048514	FALSE	7.96967e-05	4.098559453548874	657	433	32	26944	MYO1E,AKT3,PTPRJ,ARHGAP24,RAPGEF2,HDAC9,SASH1,VAV3,NFE2L2,BCAS3,HIF1A,CLIC4,IL1A,SGPL1,VEGFA,NRP2,PTEN,JAK1,ITGAV,C3,RGCC,JAG1,HK2,TGFBR1,ANPEP,CYBB,ARHGAP22,PTGS2,HMOX1,TIPARP,CD40,APOE
GO:BP	regulation of postsynapse organization	GO:0099175	FALSE	7.97499e-05	4.098270021727515	133	433	14	26944	LRRK2,APP,ASAP1,NRP2,PDLIM5,SRGN,PTEN,SIPA1L1,ARF4,DISC1,RPS6KA5,HOMER1,ARHGAP22,APOE
GO:BP	regulation of transcription by RNA polymerase II	GO:0006357	FALSE	8.03518e-05	4.095004622315554	2485	433	76	26944	TRPS1,MITF,CDK8,ETV6,PID1,FNIP2,ZEB2,MAML2,SMYD3,RREB1,HEXB,HDAC9,ARID1B,ZFP407,ELL2,NFE2L2,APP,WWOX,JARID2,AMBRA1,FNIP1,BCAS3,HIF1A,JAK2,IL1A,DYRK1A,MRTFA,RYBP,IFRD1,AP3B1,VEGFA,INHBA,BCL6,FOXP4,RHOQ,ESR1,FOXO3,SOD2,ZFP516,RFX3,MAML3,TNKS,ZFHX3,ACVR2A,NCOA2,TCF12,PPARD,NFAT5,MED13,MET,HIVEP1,ZFP609,SUPT3,ARF4,GTF2F2,MDM2,NFKBIZ,ZHX2,TNIP1,RGCC,JAG1,PIK3R1,ATXN1,NLRP3,PTPN2,LCORL,MXI1,RPS6KA5,BBX…
GO:BP	positive regulation of secretion by cell	GO:1903532	FALSE	8.12507e-05	4.090172655824325	366	433	23	26944	GNAQ,CACNA1D,RAB8B,PLA2G4A,HIF1A,CD38,JAK2,IL1A,SDC1,ACVR2A,PPARD,ACSL4,ITPR1,EXOC2,MIF,ADAM9,TRPM2,RGCC,SDC4,ITGAM,IRS2,TREM2,PTGES
GO:BP	negative regulation of transport	GO:0051051	FALSE	8.49291e-05	4.070943601490194	459	433	26	26944	PID1,GNAQ,SESTD1,HTR7,MCTP1,RABGEF1,NEDD4L,NRG1,MAP4K4,FBXO11,MYO5A,RHOQ,ESR1,MDFIC,ENTPD1,PTEN,BRAF,ACSL4,FABP5,ITGAV,SH2B2,IRS2,PTGS2,HMOX1,APOE,RSAD2
GO:BP	negative regulation of macromolecule metabolic process	GO:0010605	FALSE	9.2591e-05	4.033431159804719	3109	433	89	26944	TRPS1,MITF,ETV6,PID1,NOS2,PTPRJ,FNIP2,ZEB2,RERE,SND1,RREB1,HDAC9,LRRK2,ARG2,APP,RBM47,JARID2,FNIP1,RABGEF1,RFFL,HIF1A,CD38,CPEB4,ZCCHC7,NRG1,DYRK1A,DAPK1,FAM172A,CDYL2,LYN,RYBP,SRC,ERN1,VEGFA,BCL6,FOXP4,CD274,ESR1,MDFIC,FOXO3,NXN,SRGN,CPEB2,RFX3,TNKS,ZFHX3,HDAC8,PTEN,NCOA2,PPARD,PRDX5,CDYL,MIF,APOBEC1,SFMBT1,RIC1,HIVEP1,GPNMB,ITGAV,GCLC,MDM2,ZHX2,RGCC,PIK3R1,ATXN1,CMKLR1,NLRP3,TGFBR1,PTPN2,WAC,MX…
GO:BP	regulation of adaptive immune response	GO:0002819	FALSE	9.71888e-05	4.012383894554875	230	433	18	26944	PLA2G4A,JAK2,MALT1,BCL6,CD274,MIF,C3,NFKBIZ,H2-M2,NLRP3,NOD2,RIPK2,TRAF6,TREM2,SLC11A1,CD40,RSAD2,CLEC4N
GO:BP	regulation of hemopoiesis	GO:1903706	FALSE	9.88015e-05	4.005236574646063	431	433	25	26944	MITF,ARID1B,AMBRA1,HIF1A,MALT1,LYN,AP3B1,INHBA,BCL6,FOXO3,TNFAIP6,ATP11C,ACVR2A,BRAF,ZFP609,NFKBIZ,JAG1,PIK3R1,NLRP3,PTPN2,RIPK2,DCSTAMP,TRAF6,TREM2,MAFB
GO:BP	endothelial cell migration	GO:0043542	FALSE	0.000103867	3.9835214254578317	231	433	18	26944	AKT3,ZEB2,TNS3,HDAC9,SASH1,NFE2L2,BCAS3,HIF1A,VEGFA,PTEN,MET,ITGAV,RGCC,TGFBR1,PTGS2,HMOX1,CD40,APOE
GO:BP	platelet-derived growth factor receptor signaling pathway	GO:0048008	FALSE	0.00010705	3.9704142776504003	61	433	10	26944	MYO1E,PTPRJ,JAK2,CBLB,SRC,SGPL1,VEGFA,PTEN,PTPN2,TIPARP
GO:BP	negative regulation of cell population proliferation	GO:0008285	FALSE	0.00010808	3.966255396558892	701	433	33	26944	PTPRJ,FNIP2,RAPGEF2,ARG2,APP,JARID2,PDPN,AMBRA1,FNIP1,JAK2,IL1A,CBLB,LYN,FTH1,INHBA,BCL6,CD274,ESR1,STK3,SOD2,PTEN,PPARD,GPNMB,RGCC,PIK3R1,SDC4,TGFBR1,PTPN2,PTGS2,TREM2,HMOX1,PTGES,APOE
GO:BP	regulation of cellular response to stress	GO:0080135	FALSE	0.000109123	3.9620834898736104	497	433	27	26944	LRRK2,ARID1B,NFE2L2,APP,DIAPH2,SLC7A11,NRG1,IL1A,DYRK1A,LYN,BABAM2,MAP4K4,ERN1,PTEN,BRAF,GRINA,MIF,SUPT3,MDM2,TRPM2,PIK3R1,PTPN2,NOD2,RIPK2,GCH1,PTGS2,IER3
GO:BP	carboxylic acid transmembrane transport	GO:1905039	TRUE	0.000113746	3.944064660402633	159	433	15	26944	ACSL1,SLC7A2,LRRC8C,SLC1A2,ARG2,SLC7A11,LRRC8D,SLC23A2,SLC2A1,SLC38A6,SLC22A4,SLC7A8,ABCC5,IRS2,SLC11A1
GO:BP	regulation of lymphocyte proliferation	GO:0050670	FALSE	0.000115139	3.9387767789849737	259	433	19	26944	CD86,VAV3,ARG2,CD38,JAK2,IL1A,CBLB,LYN,BCL6,CD274,PTEN,MIF,GPNMB,H2-M2,SDC4,RIPK2,TRAF6,IRS2,CD40
GO:BP	organic acid transmembrane transport	GO:1903825	FALSE	0.000123694	3.9076506276650522	160	433	15	26944	ACSL1,SLC7A2,LRRC8C,SLC1A2,ARG2,SLC7A11,LRRC8D,SLC23A2,SLC2A1,SLC38A6,SLC22A4,SLC7A8,ABCC5,IRS2,SLC11A1
GO:BP	regulation of catalytic activity	GO:0050790	FALSE	0.00012396	3.906718423060362	533	433	28	26944	DENND1A,PTPRJ,LRCH1,RAPGEF2,CACNA1D,CD86,TANK,ASAP1,BCAS3,RFFL,JAK2,LYN,ERN1,SRGAP2,VEGFA,IQGAP2,ESR1,PTEN,SIPA1L1,MIF,NLRP3,PTPN2,CST7,IRS2,PTGS2,PTPRO,APOE,CTSB
GO:BP	myeloid cell differentiation	GO:0030099	FALSE	0.000124995	3.903107176699026	468	433	26	26944	MITF,IL31RA,ABI1,APP,HIF1A,LARGE1,JAK2,LYN,SRC,AP3B1,VEGFA,INHBA,BCL6,FOXO3,TNFAIP6,ACVR2A,FAM20C,JAG1,PIK3R1,PTPN2,DCSTAMP,TRAF6,TREM2,UBD,ALAS1,MAFB
GO:BP	cell morphogenesis	GO:0000902	FALSE	0.000135611	3.867706325769991	1045	433	42	26944	FMNL2,EXT1,ABI1,ZEB2,RAPGEF2,RERE,RREB1,HEXB,LRRK2,APP,DIAPH2,PDPN,CLIC4,NEDD4L,MALT1,EPB41L2,SLC23A2,NRG1,ALCAM,IFRD1,B4GALT5,SRC,AP3B1,SRGAP2,VEGFA,BCL6,NRP2,PDLIM5,RHOQ,SH3KBP1,PTEN,SIPA1L1,BRAF,EPB41,ITPR1,MET,NTNG2,DST,DISC1,MYO3B,PTPRO,APOE
GO:BP	carbohydrate transmembrane transport	GO:0034219	FALSE	0.000139901	3.8541781659615117	139	433	14	26944	OSBPL8,PID1,SLC1A2,NFE2L2,SLC23A2,SLC2A1,RHOQ,ESR1,BRAF,FABP5,C3,SH2B2,HK2,IRS2
GO:BP	cell-substrate junction organization	GO:0150115	FALSE	0.000141758	3.8484532752377656	98	433	12	26944	PTPRJ,RAB8B,SRC,VEGFA,FMN1,PTEN,IQSEC1,PEAK1,ITGAV,PIK3R1,SDC4,DST
GO:BP	neuron development	GO:0048666	FALSE	0.00014233	3.8467049658681307	1287	433	48	26944	CAMK1D,GNAQ,EXT1,ABI1,ZEB2,RAPGEF2,RERE,LRRK2,HTR7,NFE2L2,APP,DIAPH2,ASAP1,CD38,NEDD4L,JAK2,MALT1,SLC23A2,NRG1,ALCAM,LYN,MRTFA,IFRD1,B4GALT5,MAP4K4,SRGAP2,VEGFA,NRP2,PDLIM5,SOD2,PTEN,SIPA1L1,BRAF,ACSL4,ITPR1,NTNG2,IQSEC1,C3,ARF4,MDM2,SDC4,DST,DISC1,RAP1GAP2,MYO3B,LRP12,PTPRO,APOE
GO:BP	leukocyte migration	GO:0050900	FALSE	0.000146318	3.8347034048113353	378	433	23	26944	CAMK1D,EXT1,PTPRJ,LRCH1,VAV3,APP,PLA2G7,RABGEF1,IL1A,LYN,PDE4B,VEGFA,TNFAIP6,MIF,TRPM2,PIK3R1,CMKLR1,NLRP3,FPR3,NOD2,TREM2,BST1,PTPRO
GO:BP	regulation of mononuclear cell proliferation	GO:0032944	FALSE	0.000146812	3.8332395232941163	263	433	19	26944	CD86,VAV3,ARG2,CD38,JAK2,IL1A,CBLB,LYN,BCL6,CD274,PTEN,MIF,GPNMB,H2-M2,SDC4,RIPK2,TRAF6,IRS2,CD40
GO:BP	regulation of platelet activation	GO:0010543	FALSE	0.000150882	3.821363973731981	48	433	9	26944	GNAQ,PTPRJ,PLEK,PLA2G4A,PDPN,JAK2,LYN,TEC,APOE
GO:BP	platelet activation	GO:0030168	FALSE	0.000158995	3.798616578865851	99	433	12	26944	GNAQ,PTPRJ,PLEK,PLA2G4A,PDPN,SLC7A11,JAK2,LYN,ENTPD1,TEC,APOE,MERTK
GO:BP	regulation of synapse organization	GO:0050807	FALSE	0.00015904	3.798494127385614	292	433	20	26944	LRRK2,APP,ASAP1,SLC7A11,NRG1,NRP2,PDLIM5,SRGN,PTEN,SIPA1L1,NTNG2,ARF4,PIK3R1,DISC1,RPS6KA5,HOMER1,ARHGAP22,TREM2,PTPRO,APOE
GO:BP	tumor necrosis factor superfamily cytokine production	GO:0071706	FALSE	0.000162505	3.7891326480100673	212	433	17	26944	PTPRJ,LRRK2,ARG2,APP,JAK2,IL1A,CD274,PTEN,MIF,GPNMB,H2-M2,PIK3R1,CYBB,NOD2,RIPK2,TREM2,CD14
GO:BP	regulation of tumor necrosis factor superfamily cytokine production	GO:1903555	FALSE	0.000162505	3.7891326480100673	212	433	17	26944	PTPRJ,LRRK2,ARG2,APP,JAK2,IL1A,CD274,PTEN,MIF,GPNMB,H2-M2,PIK3R1,CYBB,NOD2,RIPK2,TREM2,CD14
GO:BP	regulation of lipid localization	GO:1905952	FALSE	0.000173509	3.760678522249318	188	433	16	26944	OSBPL8,ABCA1,ACSL1,PLA2G4A,NRG1,IL1A,PPARD,ACSL4,MIF,ITGAV,C3,PTPN2,IRS2,TREM2,PTGES,APOE
GO:BP	cellular response to lipid	GO:0071396	FALSE	0.000178812	3.7476032493841016	789	433	35	26944	ABCA1,PID1,NOS2,SMYD3,CD86,SASH1,IRAK2,JAK2,MALT1,IL1A,LYN,PDE4B,SRC,INHBA,CD274,ESR1,FOXO3,HDAC8,NCOA2,PPARD,MIF,ADAM9,GRAMD1B,NFKBIZ,TNIP1,NLRP3,MGST1,NOD2,RIPK2,GCH1,TRAF6,TREM2,NFKB1,CD14,ACOD1
GO:BP	cellular response to hormone stimulus	GO:0032870	FALSE	0.000181379	3.741412661595644	681	433	32	26944	OSBPL8,PID1,AKT3,ACSL1,PTPRJ,SMYD3,HDAC9,ARID1B,NFE2L2,BCAS3,JAK2,SRC,MBD5,INHBA,MYO5A,RHOQ,ESR1,FOXO3,CPEB2,CTSS,PTEN,NCOA2,PPARD,GCLC,MDM2,SH2B2,PIK3R1,PTPN2,IRS2,NFKB1,DENND4C,CTSB
GO:BP	macromolecule catabolic process	GO:0009057	FALSE	0.000187005	3.7281457936806977	1340	433	49	26944	FBXL5,NOS2,EXT1,FBXL17,AOAH,RNF149,SND1,HEXB,LRRK2,NFE2L2,APP,RBM47,AMBRA1,UVRAG,RFFL,RNF217,NEDD4L,MALT1,ZCCHC7,NRG1,CBLB,RYBP,ERN1,FBXO11,VEGFA,ARIH1,CTSS,PTEN,BNIP3,APOBEC1,RIC1,PSAP,GCLC,MDM2,ZHX2,SPSB1,WAC,DISC1,RNF19B,RNF128,TREM2,TIPARP,UBD,SLC11A1,APOE,IER3,TENT5C,ZC3HAV1,CTSB
GO:BP	positive regulation of cell population proliferation	GO:0008284	FALSE	0.00018793	3.7260035351725938	1097	433	43	26944	PID1,IL31RA,GNAQ,AKT3,TNS3,RREB1,CD86,VAV3,PLA2G4A,HIF1A,CD38,TPD52,JAK2,NRG1,IL1A,LYN,SRC,ERN1,VEGFA,BCL6,CD274,ESR1,PTEN,PPARD,ITPR1,MIF,ITGAV,MDM2,FRS2,H2-M2,PIK3R1,ATXN1,TGFBR1,DISC1,NOD2,HTRA1,RIPK2,TRAF6,IRS2,PTGS2,HMOX1,BST1,CD40
GO:BP	regulation of adaptive immune response based on somatic recombination of immune receptors built from immunoglobulin superfamily domains	GO:0002822	FALSE	0.000199357	3.7003682773864246	215	433	17	26944	PLA2G4A,JAK2,MALT1,BCL6,CD274,C3,NFKBIZ,H2-M2,NLRP3,NOD2,RIPK2,TRAF6,TREM2,SLC11A1,CD40,RSAD2,CLEC4N
GO:BP	positive regulation of cell-cell adhesion	GO:0022409	FALSE	0.000223511	3.650701270958547	327	433	21	26944	CD86,ARID1B,PDPN,AMBRA1,JAK2,MALT1,IL1A,AP3B1,BCL6,CD274,FOXO3,HSPH1,JAK1,NFAT5,ZFP609,NFKBIZ,H2-M2,NLRP3,RIPK2,TRAF6,ADAM19
GO:BP	positive regulation of endocytosis	GO:0045807	FALSE	0.00023245	3.633671176410125	192	433	16	26944	CAMK1D,PTPRJ,TBC1D5,LRRK2,APP,NEDD4L,VEGFA,C3,FPR3,NOD2,TREM2,SLC11A1,CD14,APOE,MERTK,CD63
GO:BP	blood vessel development	GO:0001568	FALSE	0.000233672	3.6313927896478457	761	433	34	26944	MYO1E,AKT3,PTPRJ,ARHGAP24,RAPGEF2,HDAC9,SASH1,VAV3,NFE2L2,BCAS3,HIF1A,LARGE1,CLIC4,IL1A,SGPL1,VEGFA,NRP2,PTEN,JAK1,ITGAV,C3,MDM2,RGCC,JAG1,HK2,TGFBR1,ANPEP,CYBB,ARHGAP22,PTGS2,HMOX1,TIPARP,CD40,APOE
GO:BP	regulation of synapse structure or activity	GO:0050803	FALSE	0.000234167	3.6304738118394644	299	433	20	26944	LRRK2,APP,ASAP1,SLC7A11,NRG1,NRP2,PDLIM5,SRGN,PTEN,SIPA1L1,NTNG2,ARF4,PIK3R1,DISC1,RPS6KA5,HOMER1,ARHGAP22,TREM2,PTPRO,APOE
GO:BP	organelle organization	GO:0006996	FALSE	0.000236625	3.6259394953264565	3518	433	96	26944	FMNL2,GPHN,ABCA1,EXT1,MYO1E,AKT3,ZEB2,MAN2A1,TNS3,ARHGAP10,HEXB,RAB8B,PLEK,ATG10,LRRK2,ARID1B,VAV3,SIK3,TACO1,PLA2G4A,DIAPH2,ASAP1,VTI1A,AMBRA1,FNIP1,BCAS3,UVRAG,PSTPIP2,HIF1A,LARGE1,ATP8B4,VPS13B,EPB41L2,ELMO1,IL1A,DYRK1A,SDC1,MRTFA,CARMIL1,SRC,AP3B1,SRGAP2,BCL6,PDLIM5,IQGAP2,MYO5A,RHOQ,ESR1,NSMCE2,HSPH1,SH3KBP1,SOD2,SRGN,RFX3,FMN1,NOS1AP,NUP98,TNKS,MREG,HDAC8,PTEN,SIPA1L1,BRAF,SPECC1L,EPB41,IMM…
GO:BP	pigment cell differentiation	GO:0050931	FALSE	0.000254872	3.593677825461633	37	433	8	26944	LRMDA,MITF,GNAQ,ZEB2,MYO5A,SOD2,MREG,CD63
GO:BP	glucose transmembrane transport	GO:1904659	FALSE	0.00025899	3.5867168797801376	124	433	13	26944	OSBPL8,PID1,SLC1A2,NFE2L2,SLC2A1,RHOQ,ESR1,BRAF,FABP5,C3,SH2B2,HK2,IRS2
GO:BP	developmental pigmentation	GO:0048066	FALSE	0.000262287	3.581222864193709	51	433	9	26944	LRMDA,MITF,GNAQ,ZEB2,MYO5A,SOD2,MREG,BCL2L11,CD63
GO:BP	cellular metabolic process	GO:0044237	FALSE	0.000268273	3.571422467818515	12956	433	262	26944	CAMK1D,TRPS1,MITF,CDK8,GPHN,ABCA1,CERS6,ETV6,PID1,IL31RA,NOS2,PHLPP1,TRAF3,EXT1,AKT3,ACSL1,PTPRJ,AFF1,FNIP2,SLC7A2,ZEB2,TBC1D5,MAN2A1,MAML2,PDE7B,RAPGEF2,RERE,TNS3,AOAH,SMYD3,SND1,FARS2,RREB1,HEXB,CD86,HDAC9,CREB5,SLCO3A1,PLEK,ATG10,LRRK2,ARID1B,TANK,ZFP407,SLC1A2,ELL2,ARG2,SIK3,NFE2L2,BTBD9,IRAK2,MAN1A,TACO1,APP,PLA2G4A,ST3GAL1,RBM47,WWOX,JARID2,SGMS2,RFTN1,PLA2G7,PDPN,VTI1A,AMBRA1,FNIP1,BCAS3,S…
GO:BP	hexose transmembrane transport	GO:0008645	FALSE	0.000284888	3.545325285347152	125	433	13	26944	OSBPL8,PID1,SLC1A2,NFE2L2,SLC2A1,RHOQ,ESR1,BRAF,FABP5,C3,SH2B2,HK2,IRS2
GO:BP	cellular response to cytokine stimulus	GO:0071345	FALSE	0.000286315	3.5431560740821286	1074	433	42	26944	ABCA1,PID1,IL31RA,NOS2,TRAF3,ACSL1,LRCH1,LRRK2,TANK,NFE2L2,IRAK2,RBM47,JARID2,SAA3,RABGEF1,RFFL,HIF1A,JAK2,IL1A,DAPK1,LYN,SRC,INHBA,NRP2,FOXO3,JAK1,NFAT5,OASL1,NFKBIZ,SH2B2,TEX14,PIK3R1,HK2,PTPN2,RPS6KA5,RIPK2,DCSTAMP,TRAF6,TREM2,NFKB1,CD40,CCRL2
GO:BP	response to metal ion	GO:0010038	FALSE	0.000322903	3.4909276891885765	395	433	23	26944	GPHN,LRRK2,NFE2L2,APP,PLA2G4A,HIF1A,CLIC4,IL1A,SDC1,SOD2,BRAF,BNIP3,APOBEC1,ADAM9,GCLC,MDM2,TRPM2,CYBB,HOMER1,PTGS2,HMOX1,SLC11A1,CD14
GO:BP	transcription by RNA polymerase II	GO:0006366	FALSE	0.000322953	3.4908612009226325	2571	433	76	26944	TRPS1,MITF,CDK8,ETV6,PID1,FNIP2,ZEB2,MAML2,SMYD3,RREB1,HEXB,HDAC9,ARID1B,ZFP407,ELL2,NFE2L2,APP,WWOX,JARID2,AMBRA1,FNIP1,BCAS3,HIF1A,JAK2,IL1A,DYRK1A,MRTFA,RYBP,IFRD1,AP3B1,VEGFA,INHBA,BCL6,FOXP4,RHOQ,ESR1,FOXO3,SOD2,ZFP516,RFX3,MAML3,TNKS,ZFHX3,ACVR2A,NCOA2,TCF12,PPARD,NFAT5,MED13,MET,HIVEP1,ZFP609,SUPT3,ARF4,GTF2F2,MDM2,NFKBIZ,ZHX2,TNIP1,RGCC,JAG1,PIK3R1,ATXN1,NLRP3,PTPN2,LCORL,MXI1,RPS6KA5,BBX…
GO:BP	cellular response to oxidative stress	GO:0034599	FALSE	0.000323804	3.489717369728568	249	433	18	26944	LRRK2,NFE2L2,SLC7A11,DAPK1,SRC,ERN1,FOXO3,SOD2,MAP2K4,PRDX5,BNIP3,MET,PSAP,MDM2,TRPM2,MGST1,GCH1,MSRA
GO:BP	B cell receptor signaling pathway	GO:0050853	FALSE	0.000371368	3.4301955341474666	53	433	9	26944	PLCL2,VAV3,RFTN1,CD38,LYN,TEC,NFKBIZ,SH2B2,NFKB1
GO:BP	positive regulation of protein catabolic process	GO:0045732	FALSE	0.000380897	3.4191924483455436	199	433	16	26944	FBXL5,LRRK2,APP,RNF217,NEDD4L,CBLB,ERN1,FBXO11,ARIH1,GCLC,MDM2,RNF19B,TREM2,TIPARP,APOE,IER3
GO:BP	head development	GO:0060322	FALSE	0.000392112	3.406590362434534	778	433	34	26944	GNAQ,EXT1,AKT3,ZEB2,RAPGEF2,RERE,LRRK2,SLC1A2,APP,SLC7A11,HIF1A,LARGE1,NRG1,MRTFA,SLC2A1,SRC,SPATA5,SGPL1,SRGAP2,INHBA,NRP2,FOXO3,PTEN,BRAF,SPECC1L,IMMP2L,BNIP3,PSAP,FRS2,ATXN1,DISC1,IRS2,TIPARP,MAFB
GO:BP	reproductive structure development	GO:0048608	FALSE	0.000403659	3.3939855391553118	369	433	22	26944	PLA2G4A,IL1A,SDC1,SRC,FNDC3A,SGPL1,VEGFA,INHBA,ESR1,FOXO3,TNFAIP6,ACVR2A,PTEN,IMMP2L,ITGAV,C3,PSAP,FRS2,TGFBR1,BCL2L11,TIPARP,MERTK
GO:BP	response to toxic substance	GO:0009636	FALSE	0.000410981	3.386177767636177	253	433	18	26944	ABTB2,NFE2L2,SLC7A11,HIF1A,SDC1,LYN,NXN,SOD2,PRDX6,PRDX5,MDM2,TXNRD1,MGST1,GCH1,PTGS2,PTGES,SLC11A1,APOE
GO:BP	membrane organization	GO:0061024	FALSE	0.000441793	3.3547811806144394	782	433	34	26944	OSBPL8,GPHN,ABCA1,EXOC4,RAB8B,VAV3,PLA2G4A,RFTN1,ASAP1,VTI1A,SLC7A11,UVRAG,LARGE1,ATP8B4,ELMO1,AP3B1,LPCAT2,ATP11C,EXOC6B,PTEN,BNIP3,EXOC2,GRAMD1B,C3,PSAP,GCLC,TLCD2,HK2,BCL2L11,DCSTAMP,TREM2,APOE,IER3,MAFB
GO:BP	regulation of leukocyte differentiation	GO:1902105	FALSE	0.000451013	3.3458106296270316	341	433	21	26944	MITF,ARID1B,AMBRA1,MALT1,LYN,AP3B1,BCL6,FOXO3,TNFAIP6,ATP11C,BRAF,ZFP609,NFKBIZ,PIK3R1,NLRP3,PTPN2,RIPK2,DCSTAMP,TRAF6,TREM2,MAFB
GO:BP	response to interleukin-1	GO:0070555	FALSE	0.000495293	3.305138186949888	131	433	13	26944	TANK,IRAK2,APP,SAA3,HIF1A,CD38,SRC,GCLC,RPS6KA5,RIPK2,TRAF6,NFKB1,CD40
GO:BP	reproductive system development	GO:0061458	FALSE	0.000508685	3.293550751914141	374	433	22	26944	PLA2G4A,IL1A,SDC1,SRC,FNDC3A,SGPL1,VEGFA,INHBA,ESR1,FOXO3,TNFAIP6,ACVR2A,PTEN,IMMP2L,ITGAV,C3,PSAP,FRS2,TGFBR1,BCL2L11,TIPARP,MERTK
GO:BP	pigmentation	GO:0043473	FALSE	0.000516068	3.287292917040274	110	433	12	26944	LRMDA,MITF,GNAQ,ZEB2,AP3B1,MYO5A,SOD2,MREG,LYST,BCL2L11,APOE,CD63
GO:BP	cellular response to insulin stimulus	GO:0032869	FALSE	0.000526055	3.278968704599337	230	433	17	26944	OSBPL8,PID1,AKT3,PTPRJ,HDAC9,SRC,MYO5A,RHOQ,CPEB2,PTEN,NCOA2,GCLC,SH2B2,PIK3R1,PTPN2,IRS2,DENND4C
GO:BP	regulation of cell development	GO:0060284	FALSE	0.000534359	3.2721667004142088	941	433	38	26944	MITF,ZEB2,MAN2A1,RAPGEF2,LRRK2,ARID1B,AMBRA1,HIF1A,MALT1,NRG1,IL1A,LYN,IFRD1,AP3B1,VEGFA,INHBA,BCL6,FOXO3,RFX3,TNFAIP6,ATP11C,ACVR2A,PTEN,BRAF,ZFP609,NFKBIZ,JAG1,PIK3R1,ATXN1,NLRP3,PTPN2,DISC1,RIPK2,DCSTAMP,TRAF6,TREM2,APOE,MAFB
GO:BP	positive regulation of phosphatidylinositol 3-kinase/protein kinase B signal transduction	GO:0051897	FALSE	0.000534904	3.2717238379652933	204	433	16	26944	OSBPL8,PHLPP1,PTPRJ,VAV3,AMBRA1,JAK2,NRG1,SRC,VEGFA,STK3,SPECC1L,PPARD,TGFBR1,F10,IRS2,TREM2
GO:BP	negative regulation of cell activation	GO:0050866	FALSE	0.000534904	3.2717238379652933	204	433	16	26944	ARG2,RABGEF1,CBLB,LYN,BCL6,CD274,PTEN,GPNMB,GCLC,PAG1,SDC4,PTPN2,CST7,TREM2,APOE,MERTK
GO:BP	cellular response to toxic substance	GO:0097237	FALSE	0.000541491	3.266408977745303	132	433	13	26944	ABTB2,NFE2L2,NXN,SOD2,PRDX6,PRDX5,TXNRD1,MGST1,GCH1,PTGS2,PTGES,SLC11A1,APOE
GO:BP	regulation of leukocyte proliferation	GO:0070663	FALSE	0.000544157	3.2642760891517217	286	433	19	26944	CD86,VAV3,ARG2,CD38,JAK2,IL1A,CBLB,LYN,BCL6,CD274,PTEN,MIF,GPNMB,H2-M2,SDC4,RIPK2,TRAF6,IRS2,CD40
GO:BP	synapse organization	GO:0050808	FALSE	0.000556259	3.2547228225624685	539	433	27	26944	GPHN,LRRK2,APP,ASAP1,SLC7A11,LARGE1,NRG1,SRGAP2,NRP2,PDLIM5,MYO5A,SRGN,NOS1AP,PTEN,SIPA1L1,NTNG2,C3,ARF4,PIK3R1,STK38L,DISC1,RPS6KA5,HOMER1,ARHGAP22,TREM2,PTPRO,APOE
GO:BP	cytokine-mediated signaling pathway	GO:0019221	FALSE	0.00058024	3.2363925532149977	473	433	25	26944	IL31RA,TRAF3,ACSL1,IRAK2,RBM47,RABGEF1,RFFL,HIF1A,JAK2,IL1A,LYN,SRC,INHBA,FOXO3,JAK1,OASL1,NFKBIZ,SH2B2,PIK3R1,PTPN2,RPS6KA5,RIPK2,TRAF6,TREM2,CCRL2
GO:BP	positive regulation of tumor necrosis factor production	GO:0032760	FALSE	0.000645634	3.190013531388681	134	433	13	26944	PTPRJ,LRRK2,APP,JAK2,IL1A,PTEN,MIF,H2-M2,PIK3R1,CYBB,NOD2,RIPK2,CD14
GO:BP	phosphatidylinositol 3-kinase/protein kinase B signal transduction	GO:0043491	FALSE	0.00069829	3.155964173476602	320	433	20	26944	OSBPL8,PHLPP1,PTPRJ,VAV3,AMBRA1,JAK2,NRG1,SRC,VEGFA,STK3,PTEN,SPECC1L,PPARD,PIK3R1,TGFBR1,F10,IRS2,TREM2,CD40,MERTK
GO:BP	protein secretion	GO:0009306	FALSE	0.000710789	3.148259436972189	413	433	23	26944	ABCA1,GNAQ,NOS2,CACNA1D,RAB8B,PLEK,HIF1A,CD38,JAK2,IL1A,MAP4K4,MYO5A,RFX3,PPARD,ACSL4,ITPR1,ADAM9,PSAP,TRPM2,IRS2,TREM2,APOE,RSAD2
GO:BP	postsynaptic signal transduction	GO:0098926	TRUE	0.000712299	3.1473376444405945	57	433	9	26944	KPNA1,GNAQ,ABI1,LY6I,LARGE1,JAK2,NRG1,ITPR1,LY6C2
GO:BP	lipid export from cell	GO:0140353	FALSE	0.000712299	3.1473376444405945	57	433	9	26944	NOS2,PLA2G4A,NRG1,IL1A,INHBA,ACSL4,MIF,PTGS2,PTGES
GO:BP	negative regulation of cellular biosynthetic process	GO:0031327	FALSE	0.000732669	3.1350919484379327	2768	433	79	26944	TRPS1,MITF,ETV6,PID1,NOS2,FNIP2,ZEB2,RAPGEF2,RERE,SND1,RREB1,HDAC9,PLEK,LRRK2,ARG2,APP,RBM47,JARID2,FNIP1,RABGEF1,HIF1A,CD38,CPEB4,ZCCHC7,NRG1,DYRK1A,DAPK1,FAM172A,CDYL2,RYBP,SRC,ERN1,VEGFA,BCL6,FOXP4,CD274,ESR1,MDFIC,FOXO3,SRGN,CPEB2,RFX3,ZFHX3,HDAC8,ENTPD1,NCOA2,PPARD,PRDX5,CDYL,MIF,APOBEC1,SFMBT1,HIVEP1,GPNMB,GCLC,MDM2,ZHX2,RGCC,ATXN1,CMKLR1,NLRP3,TGFBR1,PTPN2,MXI1,RPS6KA5,RNF128,NOD2,OLR1,TRA…
GO:BP	positive regulation of secretion	GO:0051047	FALSE	0.000741606	3.129826713966251	414	433	23	26944	GNAQ,CACNA1D,RAB8B,PLA2G4A,HIF1A,CD38,JAK2,IL1A,SDC1,ACVR2A,PPARD,ACSL4,ITPR1,EXOC2,MIF,ADAM9,TRPM2,RGCC,SDC4,ITGAM,IRS2,TREM2,PTGES
GO:BP	establishment of protein localization to extracellular region	GO:0035592	FALSE	0.000741606	3.129826713966251	414	433	23	26944	ABCA1,GNAQ,NOS2,CACNA1D,RAB8B,PLEK,HIF1A,CD38,JAK2,IL1A,MAP4K4,MYO5A,RFX3,PPARD,ACSL4,ITPR1,ADAM9,PSAP,TRPM2,IRS2,TREM2,APOE,RSAD2
GO:BP	regulation of tumor necrosis factor production	GO:0032680	FALSE	0.000743434	3.128757497122651	209	433	16	26944	PTPRJ,LRRK2,ARG2,APP,JAK2,IL1A,PTEN,MIF,GPNMB,H2-M2,PIK3R1,CYBB,NOD2,RIPK2,TREM2,CD14
GO:BP	tumor necrosis factor production	GO:0032640	FALSE	0.000743434	3.128757497122651	209	433	16	26944	PTPRJ,LRRK2,ARG2,APP,JAK2,IL1A,PTEN,MIF,GPNMB,H2-M2,PIK3R1,CYBB,NOD2,RIPK2,TREM2,CD14
GO:BP	cellular response to reactive oxygen species	GO:0034614	FALSE	0.000749709	3.125107557138068	159	433	14	26944	LRRK2,NFE2L2,SRC,ERN1,FOXO3,SOD2,MAP2K4,PRDX5,BNIP3,MET,PSAP,MDM2,TRPM2,GCH1
GO:BP	regulation of leukocyte migration	GO:0002685	FALSE	0.000758365	3.1201217543965085	236	433	17	26944	CAMK1D,PTPRJ,LRCH1,APP,PLA2G7,RABGEF1,IL1A,LYN,VEGFA,TNFAIP6,MIF,PIK3R1,CMKLR1,FPR3,NOD2,TREM2,BST1
GO:BP	positive regulation of tumor necrosis factor superfamily cytokine production	GO:1903557	FALSE	0.000767364	3.1149986392511115	136	433	13	26944	PTPRJ,LRRK2,APP,JAK2,IL1A,PTEN,MIF,H2-M2,PIK3R1,CYBB,NOD2,RIPK2,CD14
GO:BP	myeloid cell homeostasis	GO:0002262	FALSE	0.000793077	3.1006847226958265	210	433	16	26944	SLC7A11,HIF1A,JAK2,LYN,PDE4B,VEGFA,INHBA,BCL6,FOXO3,ACVR2A,PTPN2,BCL2L11,HMOX1,ALAS1,MAFB,MERTK
GO:BP	regulation of lymphocyte apoptotic process	GO:0070228	FALSE	0.000805476	3.093947325986709	75	433	10	26944	ARG2,ST3GAL1,FNIP1,HIF1A,LYN,CD274,PTEN,MIF,BCL2L11,IRS2
GO:BP	regulation of reactive oxygen species metabolic process	GO:2000377	FALSE	0.000809737	3.0916558640227843	160	433	14	26944	PID1,LRRK2,ARG2,NFE2L2,APP,HIF1A,FOXO3,SOD2,BNIP3,ARF4,HK2,ITGAM,GCH1,IER3
GO:BP	protein modification by small protein conjugation	GO:0032446	FALSE	0.000814098	3.089323462068733	803	433	34	26944	CDK8,FBXL5,TRAF3,FBXL17,RNF149,ATG10,LRRK2,SASH1,NFE2L2,AMBRA1,RFFL,HIF1A,RNF217,NEDD4L,CBLB,BABAM2,FBXO11,ARIH1,NSMCE2,NXN,TNKS,HDAC8,PTEN,GCLC,MDM2,SPSB1,TGFBR1,RNF19B,RNF128,NOD2,RIPK2,TRAF6,UBE2Q2,UBD
GO:BP	monoatomic ion homeostasis	GO:0050801	FALSE	0.000825279	3.083399038499469	620	433	29	26944	SLC8A1,FBXL5,EXT1,CACNA1D,HEXB,LRRK2,BTBD9,APP,HIF1A,CLIC4,IL1A,LYN,AP3B1,FTH1,MYO5A,SOD2,GRINA,BNIP3,ITPR1,ITGAV,TRPM2,DISC1,HMOX1,TBXAS1,SLC11A1,CD40,APOE,FTL1,CREG1
GO:BP	positive regulation of smooth muscle cell proliferation	GO:0048661	FALSE	0.000841725	3.0748296638937376	115	433	12	26944	GNAQ,HIF1A,JAK2,SRC,ERN1,VEGFA,MDM2,FRS2,PIK3R1,TRAF6,PTGS2,HMOX1
GO:BP	peptidyl-tyrosine phosphorylation	GO:0018108	FALSE	0.000906498	3.042633038997393	239	433	17	26944	IL31RA,PTPRJ,APP,JAK2,NRG1,DYRK1A,LYN,SRC,VEGFA,MIF,PTPN2,NOD2,RIPK2,TREM2,BST1,CD40,CLEC4N
GO:BP	canonical NF-kappaB signal transduction	GO:0007249	FALSE	0.00091235	3.039838567174782	267	433	18	26944	TRAF3,TANK,IRAK2,CLEC4D,MALT1,IL1A,ESR1,NFAT5,TNIP1,NOD2,RIPK2,TRAF6,TREM2,UBD,NFKB1,CD40,ZC3HAV1,CLEC4N
GO:BP	synaptic signaling	GO:0099536	FALSE	0.00092793	3.0324848969553106	923	433	37	26944	KPNA1,GNAQ,EXT1,EXOC4,ABI1,RAPGEF2,CACNA1D,PLCL2,LRRK2,HTR7,BTBD9,APP,LY6I,MCTP1,SLC7A11,APBA1,LARGE1,CD38,CYTH1,JAK2,NRG1,MYO5A,SRGN,PTEN,SIPA1L1,BRAF,ITPR1,LY6C2,FABP5,NTNG2,IQSEC1,GLS,ATXN1,DISC1,HOMER1,PTGS2,APOE
GO:BP	carbohydrate transport	GO:0008643	FALSE	0.000942923	3.025523911874564	162	433	14	26944	OSBPL8,PID1,SLC1A2,NFE2L2,SLC23A2,SLC2A1,RHOQ,ESR1,BRAF,FABP5,C3,SH2B2,HK2,IRS2
GO:BP	immune system development	GO:0002520	FALSE	0.000961431	3.017081789359872	240	433	17	26944	PHLPP1,CD86,JARID2,PDPN,CBLB,LYN,BCL6,CD274,BRAF,NFKBIZ,H2-M2,TGFBR1,BCL2L11,NFKB1,CD40,ACOD1,MAFB
GO:BP	regulation of protein transport	GO:0051223	FALSE	0.000966541	3.014779544747231	520	433	26	26944	GNAQ,NOS2,EXOC4,CACNA1D,APP,SLC7A11,HIF1A,CD38,JAK2,IL1A,MAP4K4,SRC,MDFIC,RFX3,PPARD,ACSL4,ITPR1,ADAM9,MDM2,TRPM2,PIK3R1,IRS2,PTGS2,TREM2,APOE,RSAD2
GO:BP	protein localization to extracellular region	GO:0071692	FALSE	0.000994253	3.002502882003672	421	433	23	26944	ABCA1,GNAQ,NOS2,CACNA1D,RAB8B,PLEK,HIF1A,CD38,JAK2,IL1A,MAP4K4,MYO5A,RFX3,PPARD,ACSL4,ITPR1,ADAM9,PSAP,TRPM2,IRS2,TREM2,APOE,RSAD2
GO:BP	peptidyl-tyrosine modification	GO:0018212	FALSE	0.00101937	2.9916676975159895	241	433	17	26944	IL31RA,PTPRJ,APP,JAK2,NRG1,DYRK1A,LYN,SRC,VEGFA,MIF,PTPN2,NOD2,RIPK2,TREM2,BST1,CD40,CLEC4N
GO:BP	negative regulation of biosynthetic process	GO:0009890	FALSE	0.00102185	2.990612611161204	2791	433	79	26944	TRPS1,MITF,ETV6,PID1,NOS2,FNIP2,ZEB2,RAPGEF2,RERE,SND1,RREB1,HDAC9,PLEK,LRRK2,ARG2,APP,RBM47,JARID2,FNIP1,RABGEF1,HIF1A,CD38,CPEB4,ZCCHC7,NRG1,DYRK1A,DAPK1,FAM172A,CDYL2,RYBP,SRC,ERN1,VEGFA,BCL6,FOXP4,CD274,ESR1,MDFIC,FOXO3,SRGN,CPEB2,RFX3,ZFHX3,HDAC8,ENTPD1,NCOA2,PPARD,PRDX5,CDYL,MIF,APOBEC1,SFMBT1,HIVEP1,GPNMB,GCLC,MDM2,ZHX2,RGCC,ATXN1,CMKLR1,NLRP3,TGFBR1,PTPN2,MXI1,RPS6KA5,RNF128,NOD2,OLR1,TRA…
GO:BP	central nervous system development	GO:0007417	FALSE	0.00103158	2.986495310444831	1006	433	39	26944	CERS6,GNAQ,EXT1,AKT3,PTPRJ,EXOC4,ZEB2,RAPGEF2,RERE,LRRK2,SLC1A2,APP,SLC7A11,HIF1A,LARGE1,VPS13B,NRG1,LYN,MRTFA,SLC2A1,B4GALT5,SRC,SPATA5,SRGAP2,INHBA,NRP2,FOXO3,STK3,PTEN,IMMP2L,BNIP3,C3,PSAP,FRS2,ATXN1,DISC1,IRS2,TREM2,MAFB
GO:BP	chemotaxis	GO:0006935	FALSE	0.00104905	2.9792040926073975	455	433	24	26944	CAMK1D,PTPRJ,VAV3,APP,SAA3,PLA2G7,NRG1,LYN,PDE4B,VEGFA,NRP2,TNFAIP6,MIF,MET,ITGAV,TRPM2,CMKLR1,PTPN2,FPR3,NOD2,TREM2,BST1,PTPRO,CCRL2
GO:BP	response to insulin	GO:0032868	FALSE	0.00107515	2.9685289440814717	299	433	19	26944	OSBPL8,PID1,AKT3,PTPRJ,HDAC9,LYN,SLC2A1,SRC,MYO5A,RHOQ,CPEB2,PTEN,NCOA2,GCLC,SH2B2,PIK3R1,PTPN2,IRS2,DENND4C
GO:BP	regulation of protein catabolic process	GO:0042176	FALSE	0.0011018	2.9578984127909047	360	433	21	26944	FBXL5,NOS2,LRRK2,APP,RNF217,NEDD4L,NRG1,CBLB,RYBP,ERN1,FBXO11,ARIH1,RIC1,GCLC,MDM2,WAC,RNF19B,TREM2,TIPARP,APOE,IER3
GO:BP	post-embryonic development	GO:0009791	FALSE	0.0011152	2.9526457498796628	118	433	12	26944	GNAQ,MYO1E,LARGE1,JAK2,SGPL1,VEGFA,SOD2,CHST11,ITPR1,TGFBR1,BCL2L11,TIPARP
GO:BP	cellular oxidant detoxification	GO:0098869	FALSE	0.00111524	2.9526311982743025	97	433	11	26944	NFE2L2,NXN,SOD2,PRDX6,PRDX5,TXNRD1,MGST1,GCH1,PTGS2,PTGES,APOE
GO:BP	taxis	GO:0042330	FALSE	0.0011348	2.9450805953124113	457	433	24	26944	CAMK1D,PTPRJ,VAV3,APP,SAA3,PLA2G7,NRG1,LYN,PDE4B,VEGFA,NRP2,TNFAIP6,MIF,MET,ITGAV,TRPM2,CMKLR1,PTPN2,FPR3,NOD2,TREM2,BST1,PTPRO,CCRL2
GO:BP	regulation of cellular component biogenesis	GO:0044087	FALSE	0.0011389	2.9435161599701156	1010	433	39	26944	ABCA1,PTPRJ,FNIP2,ARHGAP24,RAPGEF2,PLEK,LRRK2,APP,AMBRA1,FNIP1,MPP7,NEDD4L,NRG1,DYRK1A,SDC1,CARMIL1,SRC,VEGFA,PDLIM5,RHOQ,FMN1,PTEN,SIPA1L1,BRAF,MET,NTNG2,PEAK1,ARF4,TRPM2,RGCC,PIK3R1,PLD1,SDC4,TGFBR1,BCL2L11,SVIL,MYO3B,TREM2,APOE
GO:BP	negative regulation of apoptotic signaling pathway	GO:2001234	FALSE	0.00114486	2.9412462872137097	243	433	17	26944	LRRK2,NFE2L2,RFFL,HIF1A,NRG1,MRTFA,SRC,SOD2,GRINA,MIF,ITGAV,GCLC,MDM2,TGFBR1,PTGS2,HMOX1,IER3
GO:BP	protein ubiquitination	GO:0016567	FALSE	0.00125973	2.89972	743	433	32	26944	CDK8,FBXL5,TRAF3,FBXL17,RNF149,LRRK2,SASH1,NFE2L2,AMBRA1,RFFL,RNF217,NEDD4L,CBLB,BABAM2,FBXO11,ARIH1,NSMCE2,NXN,TNKS,HDAC8,PTEN,GCLC,MDM2,SPSB1,TGFBR1,RNF19B,RNF128,NOD2,RIPK2,TRAF6,UBE2Q2,UBD
GO:BP	process utilizing autophagic mechanism	GO:0061919	FALSE	0.00129741	2.8869215361025713	494	433	25	26944	TBC1D5,ATG10,LRRK2,VTI1A,AMBRA1,BCAS3,UVRAG,HIF1A,DAPK1,INHBA,MYO5A,FOXO3,DRAM1,ACVR2A,BNIP3,HK2,STK38L,BCL2L11,WAC,NOD2,RIPK2,TRAF6,TREM2,HMOX1,CREG1
GO:BP	autophagy	GO:0006914	FALSE	0.00129741	2.8869215361025713	494	433	25	26944	TBC1D5,ATG10,LRRK2,VTI1A,AMBRA1,BCAS3,UVRAG,HIF1A,DAPK1,INHBA,MYO5A,FOXO3,DRAM1,ACVR2A,BNIP3,HK2,STK38L,BCL2L11,WAC,NOD2,RIPK2,TRAF6,TREM2,HMOX1,CREG1
GO:BP	regulation of peptidyl-tyrosine phosphorylation	GO:0050730	FALSE	0.001312	2.882067108969301	218	433	16	26944	IL31RA,PTPRJ,APP,JAK2,NRG1,LYN,SRC,VEGFA,MIF,PTPN2,NOD2,RIPK2,TREM2,BST1,CD40,CLEC4N
GO:BP	regulation of protein localization	GO:0032880	FALSE	0.00134849	2.870153503446766	977	433	38	26944	PID1,GNAQ,NOS2,EXOC4,CACNA1D,LRRK2,SIK3,APP,SLC7A11,HIF1A,CD38,NEDD4L,JAK2,EPB41L2,IL1A,MAP4K4,SRC,VEGFA,MYO5A,RHOQ,MDFIC,RFX3,TNFAIP6,JAK1,EPB41,PPARD,ACSL4,ITPR1,ASTN2,ADAM9,MDM2,TRPM2,PIK3R1,IRS2,PTGS2,TREM2,APOE,RSAD2
GO:BP	protein modification by small protein conjugation or removal	GO:0070647	FALSE	0.00141098	2.850478470625032	900	433	36	26944	CDK8,FBXL5,TRAF3,FBXL17,RNF149,ATG10,LRRK2,TANK,SASH1,NFE2L2,AMBRA1,RFFL,HIF1A,RNF217,NEDD4L,CBLB,BABAM2,FBXO11,ARIH1,NSMCE2,NXN,TNKS,HDAC8,PTEN,GCLC,MDM2,TNIP1,SPSB1,TGFBR1,RNF19B,RNF128,NOD2,RIPK2,TRAF6,UBE2Q2,UBD
GO:BP	cellular detoxification	GO:1990748	FALSE	0.00146496	2.8341754652545643	121	433	12	26944	NFE2L2,NXN,SOD2,PRDX6,PRDX5,TXNRD1,MGST1,GCH1,PTGS2,PTGES,SLC11A1,APOE
GO:BP	bone remodeling	GO:0046849	FALSE	0.00152096	2.817882819378121	100	433	11	26944	MITF,EXT1,TNS3,CD38,SRC,VEGFA,CTSS,SUCO,ITGAV,DCSTAMP,TRAF6
GO:BP	regulation of cell-substrate junction organization	GO:0150116	FALSE	0.00172105	2.7642075179763177	63	433	9	26944	PTPRJ,SRC,VEGFA,FMN1,PTEN,IQSEC1,PEAK1,PIK3R1,SDC4
GO:BP	regulation of cell-matrix adhesion	GO:0001952	FALSE	0.00174919	2.757163355036894	123	433	12	26944	PTPRJ,SRC,VEGFA,BCL6,FMN1,PTEN,PEAK1,JAG1,PIK3R1,SDC4,DISC1,BST1
GO:BP	regulation of proteolysis	GO:0030162	FALSE	0.00175189	2.75649	435	433	23	26944	TRAF3,LRRK2,TANK,APP,RFFL,RNF217,JAK2,RYBP,SRC,ERN1,ARIH1,PTEN,GCLC,MDM2,PIK3R1,NLRP3,WAC,DISC1,RNF19B,CST7,PTGS2,TREM2,APOE
GO:BP	monoatomic cation homeostasis	GO:0055080	FALSE	0.00179351	2.746296129351609	608	433	28	26944	SLC8A1,FBXL5,EXT1,CACNA1D,HEXB,LRRK2,BTBD9,APP,HIF1A,CLIC4,IL1A,LYN,AP3B1,FTH1,MYO5A,SOD2,GRINA,BNIP3,ITPR1,ITGAV,TRPM2,DISC1,HMOX1,SLC11A1,CD40,APOE,FTL1,CREG1
GO:BP	positive regulation of leukocyte cell-cell adhesion	GO:1903039	FALSE	0.00182454	2.738846704691807	280	433	18	26944	CD86,ARID1B,AMBRA1,JAK2,MALT1,IL1A,AP3B1,BCL6,CD274,FOXO3,HSPH1,NFAT5,ZFP609,NFKBIZ,H2-M2,NLRP3,RIPK2,TRAF6
GO:BP	monocarboxylic acid transport	GO:0015718	FALSE	0.00186156	2.7301224108541122	197	433	15	26944	NOS2,ACSL1,SLCO3A1,PLA2G4A,IL1A,SLC2A1,PPARD,ACSL4,MIF,SLC16A10,FABP5,IRS2,PTGS2,PTGES,APOE
GO:BP	cellular response to external stimulus	GO:0071496	FALSE	0.00187385	2.7272656839204115	404	433	22	26944	LRRK2,SLC1A2,NFE2L2,AMBRA1,FNIP1,CPEB4,LYN,SLC2A1,INHBA,FOXO3,TNKS,ACVR2A,MAP2K4,PPARD,BNIP3,GCLC,MDM2,PLD1,PTGS2,NFKB1,CD40,CHKA
GO:BP	glucose import	GO:0046323	FALSE	0.00188093	2.7256273461700884	82	433	10	26944	OSBPL8,PID1,SLC1A2,NFE2L2,SLC2A1,RHOQ,ESR1,SH2B2,HK2,IRS2
GO:BP	cell-matrix adhesion	GO:0007160	FALSE	0.0018848	2.7247356163992653	224	433	16	26944	PTPRJ,SRC,VEGFA,BCL6,FMN1,PTEN,ADAM9,PEAK1,ITGAV,JAG1,PIK3R1,SDC4,BCL2L11,DISC1,BST1,CD63
GO:BP	positive regulation of proteolysis	GO:0045862	FALSE	0.0018848	2.7247356163992653	224	433	16	26944	LRRK2,TANK,APP,RNF217,JAK2,SRC,ERN1,ARIH1,PTEN,GCLC,MDM2,NLRP3,DISC1,RNF19B,TREM2,APOE
GO:BP	negative regulation of lipid localization	GO:1905953	FALSE	0.00197448	2.7045463943041512	64	433	9	26944	OSBPL8,NRG1,PPARD,ACSL4,ITGAV,PTPN2,IRS2,TREM2,APOE
GO:BP	lymphocyte apoptotic process	GO:0070227	FALSE	0.00205158	2.6879117105903725	103	433	11	26944	ARG2,ST3GAL1,FNIP1,HIF1A,LYN,CD274,PTEN,MIF,NFKBIZ,BCL2L11,IRS2
GO:BP	negative regulation of protein metabolic process	GO:0051248	FALSE	0.00210487	2.676775495268707	686	433	30	26944	PID1,NOS2,PTPRJ,LRRK2,RABGEF1,RFFL,CPEB4,NRG1,DAPK1,LYN,RYBP,ERN1,NXN,CPEB2,HDAC8,PTEN,CDYL,MIF,RIC1,ITGAV,GCLC,MDM2,PIK3R1,PTPN2,WAC,CST7,PTGS2,TREM2,PTPRO,APOE
GO:BP	inorganic ion homeostasis	GO:0098771	FALSE	0.0021812	2.6613039832341756	543	433	26	26944	SLC8A1,FBXL5,EXT1,CACNA1D,HEXB,BTBD9,APP,HIF1A,IL1A,LYN,AP3B1,FTH1,MYO5A,SOD2,GRINA,BNIP3,ITPR1,ITGAV,TRPM2,DISC1,HMOX1,TBXAS1,SLC11A1,CD40,APOE,FTL1
GO:BP	tissue morphogenesis	GO:0048729	FALSE	0.00222189	2.6532778369984373	651	433	29	26944	EXT1,EXOC4,ARHGAP24,ZEB2,RREB1,PDPN,HIF1A,CLIC4,NRG1,MRTFA,SRC,VEGFA,INHBA,NRP2,ESR1,STK3,FMN1,PTEN,SPECC1L,MTHFD1L,MET,ASTN2,MDM2,FRS2,JAG1,SDC4,TGFBR1,TXNRD1,TRAF6
GO:BP	response to inorganic substance	GO:0010035	FALSE	0.00222189	2.6532778369984373	651	433	29	26944	GPHN,LRRK2,NFE2L2,APP,PLA2G4A,HIF1A,CLIC4,IL1A,SDC1,SRC,ERN1,SOD2,KPNA4,BRAF,NFAT5,BNIP3,APOBEC1,ADAM9,ITGAV,GCLC,MDM2,TRPM2,CYBB,HOMER1,GCH1,PTGS2,HMOX1,SLC11A1,CD14
GO:BP	negative regulation of cell-cell adhesion	GO:0022408	FALSE	0.00225425	2.6469970160791316	200	433	15	26944	ARG2,JAK2,CBLB,VEGFA,BCL6,CD274,PTEN,SPECC1L,GPNMB,PAG1,RGCC,JAG1,PIK3R1,SDC4,PTPN2
GO:BP	regulation of glucose import	GO:0046324	FALSE	0.00225956	2.645976409395687	65	433	9	26944	OSBPL8,PID1,SLC1A2,NFE2L2,RHOQ,ESR1,SH2B2,HK2,IRS2
GO:BP	positive regulation of T cell activation	GO:0050870	FALSE	0.00236511	2.626148092733204	256	433	17	26944	CD86,ARID1B,AMBRA1,JAK2,MALT1,IL1A,AP3B1,BCL6,CD274,FOXO3,HSPH1,ZFP609,NFKBIZ,H2-M2,NLRP3,RIPK2,TRAF6
GO:BP	peptide transport	GO:0015833	FALSE	0.00238187	2.6230816145746836	346	433	20	26944	ABCA1,GNAQ,NOS2,CACNA1D,RAB8B,SLC7A11,HIF1A,CD38,JAK2,MAP4K4,MYO5A,RFX3,PPARD,ACSL4,ITPR1,SLC16A10,TRPM2,ABCC5,MGST1,IRS2
GO:BP	intracellular monoatomic ion homeostasis	GO:0006873	FALSE	0.00241655	2.6168044190668662	546	433	26	26944	SLC8A1,FBXL5,CACNA1D,HEXB,LRRK2,APP,HIF1A,CLIC4,IL1A,LYN,AP3B1,FTH1,MYO5A,GRINA,BNIP3,ITPR1,ITGAV,TRPM2,DISC1,HMOX1,TBXAS1,SLC11A1,CD40,APOE,FTL1,CREG1
GO:BP	protein catabolic process	GO:0030163	FALSE	0.00243088	2.6142363757005795	961	433	37	26944	FBXL5,NOS2,EXT1,FBXL17,RNF149,LRRK2,NFE2L2,APP,AMBRA1,RFFL,RNF217,NEDD4L,MALT1,NRG1,CBLB,RYBP,ERN1,FBXO11,ARIH1,CTSS,PTEN,BNIP3,RIC1,PSAP,GCLC,MDM2,SPSB1,WAC,DISC1,RNF19B,RNF128,TREM2,TIPARP,UBD,APOE,IER3,CTSB
GO:BP	leukocyte chemotaxis	GO:0030595	FALSE	0.00252513	2.5977156871591016	229	433	16	26944	CAMK1D,PTPRJ,VAV3,APP,PLA2G7,LYN,PDE4B,VEGFA,TNFAIP6,MIF,TRPM2,CMKLR1,FPR3,NOD2,BST1,PTPRO
GO:BP	positive regulation of molecular function	GO:0044093	FALSE	0.00261104	2.5831857185689167	479	433	24	26944	CAMK1D,DENND1A,RAPGEF2,CACNA1D,CD86,TANK,ASAP1,BCAS3,JAK2,ERN1,SRGAP2,VEGFA,ESR1,CTSS,PTEN,SIPA1L1,MIF,NLRP3,RPS6KA5,NOD2,RIPK2,TRAF6,TREM2,APOE
GO:BP	regulation of cellular localization	GO:0060341	FALSE	0.00264592	2.5774227331383406	1086	433	40	26944	PID1,GNAQ,NOS2,EXOC4,CACNA1D,LRRK2,SIK3,APP,SLC7A11,HIF1A,CD38,NEDD4L,JAK2,EPB41L2,IL1A,MAP4K4,SRC,VEGFA,MYO5A,RHOQ,MDFIC,RFX3,TNFAIP6,PTEN,JAK1,EPB41,PPARD,ACSL4,ITPR1,ASTN2,ADAM9,MDM2,TRPM2,PIK3R1,IRS2,PTGS2,TREM2,APOE,IER3,RSAD2
GO:BP	alpha-beta T cell activation	GO:0046631	FALSE	0.0030766	2.511928572250611	205	433	15	26944	ARG2,JAK2,MALT1,CBLB,AP3B1,BCL6,CD274,HSPH1,BRAF,PSAP,NFKBIZ,H2-M2,NLRP3,RIPK2,RSAD2
GO:BP	myeloid leukocyte differentiation	GO:0002573	FALSE	0.0030869	2.510477731237807	261	433	17	26944	MITF,IL31RA,APP,LARGE1,LYN,SRC,AP3B1,VEGFA,TNFAIP6,FAM20C,PIK3R1,PTPN2,DCSTAMP,TRAF6,TREM2,UBD,MAFB
GO:BP	cell chemotaxis	GO:0060326	FALSE	0.00312542	2.505091691918648	321	433	19	26944	CAMK1D,PTPRJ,VAV3,APP,SAA3,PLA2G7,LYN,PDE4B,VEGFA,TNFAIP6,MIF,MET,TRPM2,CMKLR1,FPR3,NOD2,BST1,PTPRO,CCRL2
GO:BP	regulation of organelle organization	GO:0033043	FALSE	0.00324524	2.488753218498663	1178	433	42	26944	ZEB2,PLEK,LRRK2,ARID1B,PLA2G4A,AMBRA1,FNIP1,BCAS3,HIF1A,IL1A,DYRK1A,SDC1,CARMIL1,SRC,IQGAP2,ESR1,NSMCE2,HSPH1,FMN1,TNKS,HDAC8,SIPA1L1,BRAF,SPECC1L,BNIP3,DDHD1,MET,ARF4,GCLC,TRPM2,TEX14,RGCC,PIK3R1,SDC4,TGFBR1,BCL2L11,SVIL,NOD2,MYO3B,TREM2,BST1,IER3
GO:BP	amide transport	GO:0042886	FALSE	0.0032506	2.4880368570007074	385	433	21	26944	ABCA1,GNAQ,NOS2,CACNA1D,RAB8B,SLC7A11,HIF1A,CD38,JAK2,MAP4K4,MYO5A,RFX3,PPARD,ACSL4,ITPR1,SLC16A10,PSAP,TRPM2,ABCC5,MGST1,IRS2
GO:BP	epithelial cell differentiation	GO:0030855	FALSE	0.00329357	2.482333254414014	777	433	32	26944	IL31RA,EXT1,MYO1E,ZEB2,RAPGEF2,PDPN,SLC7A11,HIF1A,CLIC4,NRG1,IL1A,SDC1,SRC,FNDC3A,VEGFA,FOXP4,ESR1,RFX3,FAM20C,MET,ADAM9,PSAP,NFKBIZ,FRS2,JAG1,TGFBR1,MYO3B,PTGS2,PTPRO,MAFB,CTSB,CD63
GO:BP	neuron apoptotic process	GO:0051402	FALSE	0.00338889	2.4699420868496302	354	433	20	26944	APP,AMBRA1,HIF1A,JAK2,CPEB4,GBE1,VEGFA,ESR1,FOXO3,HSPH1,SOD2,MAP2K4,BRAF,BNIP3,GCLC,BCL2L11,TREM2,HMOX1,APOE,CTSB
GO:BP	myeloid leukocyte activation	GO:0002274	FALSE	0.0034275	2.465022938155501	263	433	17	26944	SLC7A2,LRRK2,APP,PLA2G4A,CLEC4D,RABGEF1,JAK2,LYN,ADAM9,ITGAM,DCSTAMP,CST7,TRAF6,TREM2,HMOX1,UBD,SLC11A1
GO:BP	regulation of leukocyte chemotaxis	GO:0002688	FALSE	0.00372721	2.4286161187063717	132	433	12	26944	CAMK1D,PTPRJ,APP,PLA2G7,LYN,VEGFA,TNFAIP6,MIF,CMKLR1,FPR3,NOD2,BST1
GO:BP	organonitrogen compound biosynthetic process	GO:1901566	FALSE	0.00377834	2.4226994129583193	1707	433	54	26944	GPHN,ABCA1,CERS6,PID1,EXT1,ACSL1,MAN2A1,FARS2,SLC1A2,ARG2,NFE2L2,MAN1A,TACO1,APP,PLA2G4A,ST3GAL1,SGMS2,SLC7A11,HIF1A,LARGE1,CPEB4,DAPK1,LYN,CDKAL1,B4GALT5,XYLT1,ERN1,INHBA,ST3GAL3,FOXO3,LPCAT2,CPEB2,ENTPD1,CHST11,MGAT5,MTHFD1L,ACSL4,APOBEC1,FABP5,GCLC,TNIP1,GLS,PLD1,ABCC5,NARS2,KYNU,NOD2,GCH1,PAPSS2,TREM2,NFKB1,APOE,ALAS1,CHKA
GO:BP	regulation of establishment of protein localization	GO:0070201	FALSE	0.00386649	2.4126830223300986	596	433	27	26944	GNAQ,NOS2,EXOC4,CACNA1D,LRRK2,APP,SLC7A11,HIF1A,CD38,JAK2,IL1A,MAP4K4,SRC,MDFIC,RFX3,PPARD,ACSL4,ITPR1,ADAM9,MDM2,TRPM2,PIK3R1,IRS2,PTGS2,TREM2,APOE,RSAD2
GO:BP	vascular process in circulatory system	GO:0003018	FALSE	0.00396477	2.4017822264172084	237	433	16	26944	EXT1,PTPRJ,ZEB2,HTR7,HIF1A,CD38,SLC2A1,VEGFA,SOD2,PPARD,FABP5,GCLC,GCH1,PTGS2,TBXAS1,APOE
GO:BP	development of primary sexual characteristics	GO:0045137	FALSE	0.00404725	2.39284	296	433	18	26944	PLA2G4A,IL1A,SDC1,LHFPL2,SRC,FNDC3A,SGPL1,VEGFA,INHBA,ESR1,FOXO3,TNFAIP6,ACVR2A,IMMP2L,ITGAV,TGFBR1,BCL2L11,TIPARP
GO:BP	positive regulation of leukocyte proliferation	GO:0070665	FALSE	0.00409828	2.387398730942902	183	433	14	26944	CD86,VAV3,CD38,JAK2,IL1A,LYN,BCL6,CD274,MIF,H2-M2,RIPK2,TRAF6,IRS2,CD40
GO:BP	regulation of fatty acid transport	GO:2000191	FALSE	0.00426299	2.3702851877074322	37	433	7	26944	ACSL1,PLA2G4A,IL1A,ACSL4,MIF,IRS2,PTGES
GO:BP	positive regulation of endothelial cell migration	GO:0010595	FALSE	0.00433954	2.3625563897279913	111	433	11	26944	AKT3,HDAC9,SASH1,NFE2L2,BCAS3,HIF1A,VEGFA,MET,PTGS2,HMOX1,CD40
GO:BP	positive regulation of platelet activation	GO:0010572	FALSE	0.00443016	2.3535807533287416	14	433	5	26944	PTPRJ,PLEK,PLA2G4A,PDPN,JAK2
GO:BP	positive regulation of T-helper 17 type immune response	GO:2000318	FALSE	0.00443016	2.3535807533287416	14	433	5	26944	JAK2,MALT1,NFKBIZ,NLRP3,CLEC4N
GO:BP	negative regulation of cellular component organization	GO:0051129	FALSE	0.00460953	2.3363434356134993	751	433	31	26944	ARHGAP24,RAPGEF2,LRRK2,DIAPH2,MCTP1,FNIP1,RABGEF1,CD38,DYRK1A,CARMIL1,IFRD1,MAP4K4,SRC,VEGFA,ESR1,TNKS,PTEN,SPECC1L,BNIP3,APOBEC1,MET,ITGAV,GCLC,MDM2,TEX14,PIK3R1,SVIL,RAP1GAP2,TREM2,APOE,IER3
GO:BP	regulation of alpha-beta T cell activation	GO:0046634	FALSE	0.00472971	2.3251654821494587	135	433	12	26944	ARG2,JAK2,MALT1,CBLB,AP3B1,BCL6,CD274,HSPH1,NFKBIZ,H2-M2,NLRP3,RIPK2
GO:BP	positive regulation of protein transport	GO:0051222	FALSE	0.00489521	2.3102285592606684	300	433	18	26944	GNAQ,CACNA1D,APP,HIF1A,CD38,JAK2,IL1A,SRC,PPARD,ACSL4,ITPR1,ADAM9,MDM2,TRPM2,PIK3R1,IRS2,PTGS2,TREM2
GO:BP	negative regulation of macromolecule biosynthetic process	GO:0010558	FALSE	0.00494732	2.3056302249525897	2710	433	75	26944	TRPS1,MITF,ETV6,NOS2,FNIP2,ZEB2,RERE,SND1,RREB1,HDAC9,LRRK2,ARG2,APP,RBM47,JARID2,FNIP1,RABGEF1,HIF1A,CD38,CPEB4,ZCCHC7,NRG1,DYRK1A,DAPK1,FAM172A,CDYL2,RYBP,SRC,ERN1,VEGFA,BCL6,FOXP4,CD274,ESR1,MDFIC,FOXO3,SRGN,CPEB2,RFX3,ZFHX3,HDAC8,NCOA2,PPARD,PRDX5,CDYL,MIF,APOBEC1,SFMBT1,HIVEP1,GPNMB,GCLC,MDM2,ZHX2,RGCC,ATXN1,CMKLR1,NLRP3,TGFBR1,PTPN2,MXI1,RPS6KA5,RNF128,NOD2,OLR1,TRAF6,SFMBT2,TREM2,HMOX1,TIP…
GO:BP	anatomical structure homeostasis	GO:0060249	FALSE	0.00515618	2.287672215391729	271	433	17	26944	EXT1,AKT3,ZEB2,TNS3,CD38,VPS13B,SLC2A1,SRC,VEGFA,CTSS,PRDX5,ITGAV,NFKBIZ,NOD2,DCSTAMP,TRAF6,PTGS2
GO:BP	tissue homeostasis	GO:0001894	FALSE	0.00515618	2.287672215391729	271	433	17	26944	EXT1,AKT3,ZEB2,TNS3,CD38,VPS13B,SLC2A1,SRC,VEGFA,CTSS,PRDX5,ITGAV,NFKBIZ,NOD2,DCSTAMP,TRAF6,PTGS2
GO:BP	cellular response to peptidoglycan	GO:0071224	FALSE	0.0052758	2.277711523788322	7	433	4	26944	NLRP3,NOD2,RIPK2,TREM2
GO:BP	regulation of phosphatidylinositol 3-kinase/protein kinase B signal transduction	GO:0051896	FALSE	0.00542011	2.2659919629385112	272	433	17	26944	OSBPL8,PHLPP1,PTPRJ,VAV3,AMBRA1,JAK2,NRG1,SRC,VEGFA,STK3,PTEN,SPECC1L,PPARD,TGFBR1,F10,IRS2,TREM2
GO:BP	lipid metabolic process	GO:0006629	FALSE	0.00542935	2.265251851577892	1417	433	47	26944	CDK8,ABCA1,CERS6,ACSL1,AOAH,HEXB,PLCL2,PLEK,APP,PLA2G4A,ST3GAL1,SGMS2,PLA2G7,PDPN,UVRAG,IL1A,B4GALT5,SGPL1,MYO5A,ESR1,ST3GAL3,LPCAT2,PRDX6,PTEN,NCOA2,PPARD,ACSL4,SLC22A4,MIF,APOBEC1,FABP5,C3,PSAP,AIG1,PIK3R1,PLD1,ACPP,BCKDHB,AGPS,IRS2,PTGS2,TREM2,TBXAS1,TIPARP,PTGES,APOE,CHKA
GO:BP	intracellular monoatomic cation homeostasis	GO:0030003	FALSE	0.00546343	2.2625345408805195	535	433	25	26944	SLC8A1,FBXL5,CACNA1D,HEXB,LRRK2,APP,HIF1A,CLIC4,IL1A,LYN,AP3B1,FTH1,MYO5A,GRINA,BNIP3,ITPR1,ITGAV,TRPM2,DISC1,HMOX1,SLC11A1,CD40,APOE,FTL1,CREG1
GO:BP	positive regulation of cell development	GO:0010720	FALSE	0.00546343	2.2625345408805195	535	433	25	26944	ZEB2,MAN2A1,ARID1B,AMBRA1,HIF1A,MALT1,NRG1,LYN,AP3B1,VEGFA,BCL6,FOXO3,RFX3,ATP11C,BRAF,ZFP609,NFKBIZ,ATXN1,NLRP3,DISC1,RIPK2,DCSTAMP,TRAF6,TREM2,APOE
GO:BP	negative regulation of developmental process	GO:0051093	FALSE	0.00557698	2.253600621827962	1078	433	39	26944	LDLRAD4,RAPGEF2,CD86,NFE2L2,APP,DIAPH2,JARID2,ASAP1,HIF1A,IL1A,LYN,IFRD1,MAP4K4,VEGFA,INHBA,BCL6,FOXP4,FOXO3,STK3,SOD2,SRGN,TNFAIP6,HDAC8,PTEN,PPARD,BNIP3,SFMBT1,ITGAV,FRS2,ZHX2,RGCC,JAG1,PIK3R1,TGFBR1,PTPN2,TREM2,APOE,TENT5C,MAFB
GO:BP	response to nutrient	GO:0007584	FALSE	0.00563639	2.248998672417346	188	433	14	26944	ABCA1,ACSL1,IL1A,SOD2,TNKS,GCLC,MDM2,NFKBIZ,PLD1,CYBB,BCKDHB,KYNU,NOD2,PTGS2
GO:BP	negative regulation of inflammatory response	GO:0050728	FALSE	0.005643	2.2484899913907506	162	433	13	26944	AOAH,RABGEF1,TNFAIP6,PPARD,NLRP3,PTPN2,FPR3,NOD2,CST7,TREM2,NFKB1,APOE,IER3
GO:BP	carbohydrate metabolic process	GO:0005975	FALSE	0.00567957	2.2456848882444147	572	433	26	26944	EXT1,MAN2A1,HEXB,PLEK,MAN1A,APP,PLA2G4A,HIF1A,SLC23A2,B4GALT5,SRC,GBE1,GPD2,BRAF,CHST11,NCOA2,FABP5,GCLC,PIK3R1,HK2,PTPN2,RBKS,GYS1,IRS2,NFKB1,IER3
GO:BP	brain development	GO:0007420	FALSE	0.00610109	2.214592227684417	723	433	30	26944	GNAQ,EXT1,AKT3,ZEB2,RAPGEF2,RERE,LRRK2,SLC1A2,APP,SLC7A11,HIF1A,LARGE1,NRG1,MRTFA,SLC2A1,SRC,SPATA5,SRGAP2,INHBA,NRP2,FOXO3,PTEN,IMMP2L,BNIP3,PSAP,FRS2,ATXN1,DISC1,IRS2,MAFB
GO:BP	negative regulation of immune system process	GO:0002683	FALSE	0.00643908	2.191176358311536	540	433	25	26944	PTPRJ,LRCH1,PLCL2,CD86,ARG2,RABGEF1,CBLB,LYN,BCL6,CD274,TNFAIP6,PTEN,MIF,GPNMB,PAG1,H2-M2,PIK3R1,SDC4,PTPN2,NOD2,CST7,TREM2,HMOX1,MAFB,MERTK
GO:BP	positive regulation of peptidyl-tyrosine phosphorylation	GO:0050731	FALSE	0.00646998	2.1890970975262127	164	433	13	26944	IL31RA,PTPRJ,JAK2,NRG1,LYN,SRC,VEGFA,MIF,NOD2,RIPK2,TREM2,CD40,CLEC4N
GO:BP	positive regulation of lymphocyte proliferation	GO:0050671	FALSE	0.00646998	2.1890970975262127	164	433	13	26944	CD86,VAV3,CD38,JAK2,IL1A,BCL6,CD274,MIF,H2-M2,RIPK2,TRAF6,IRS2,CD40
GO:BP	bone resorption	GO:0045453	FALSE	0.00687735	2.162578700261349	74	433	9	26944	EXT1,TNS3,CD38,SRC,VEGFA,CTSS,ITGAV,DCSTAMP,TRAF6
GO:BP	detoxification	GO:0098754	FALSE	0.00693576	2.158905661495348	140	433	12	26944	NFE2L2,NXN,SOD2,PRDX6,PRDX5,TXNRD1,MGST1,GCH1,PTGS2,PTGES,SLC11A1,APOE
GO:BP	melanocyte differentiation	GO:0030318	FALSE	0.00694501	2.1583270033918343	26	433	6	26944	LRMDA,MITF,GNAQ,ZEB2,MYO5A,MREG
GO:BP	hormone transport	GO:0009914	FALSE	0.0072173	2.1416249631417728	405	433	21	26944	GNAQ,NOS2,CACNA1D,RAB8B,HIF1A,CD38,JAK2,NRG1,LYN,MAP4K4,INHBA,MYO5A,RFX3,ACVR2A,PPARD,ACSL4,ITPR1,SLC16A10,SLC7A8,TRPM2,IRS2
GO:BP	carbohydrate derivative metabolic process	GO:1901135	FALSE	0.00757545	2.1205917071535185	1092	433	39	26944	PID1,EXT1,ACSL1,MAN2A1,PDE7B,AOAH,HEXB,LRRK2,MAN1A,APP,ST3GAL1,HIF1A,LARGE1,B4GALT5,PDE4B,XYLT1,RHOQ,ST3GAL3,GPD2,TNFAIP6,ENTPD1,CHST11,MGAT5,PPARD,ACSL4,PDE8A,APOBEC1,PSAP,TNIP1,HK2,ABCC5,ACPP,KYNU,RBKS,PAPSS2,DPYS,TREM2,NFKB1,IER3
GO:BP	behavior	GO:0007610	FALSE	0.00788308	2.103303894266789	771	433	31	26944	GNAQ,EXT1,HEXB,LRRK2,SLC1A2,HTR7,BTBD9,TACO1,APP,SLC7A11,APBA1,HIF1A,LARGE1,NRG1,SRC,MBD5,MYO5A,SOD2,ACVR2A,PTEN,BRAF,NCOA2,ARF4,PSAP,GLS,ATXN1,HOMER1,GPR176,PTGS2,TREM2,APOE
GO:BP	animal organ morphogenesis	GO:0009887	FALSE	0.0079099	2.1018289817885023	1094	433	39	26944	EXT1,AKT3,EXOC4,MAN2A1,LRRK2,SIK3,WWOX,HIF1A,LARGE1,NRG1,SRC,SGPL1,AP3B1,VEGFA,INHBA,NRP2,MYO5A,ESR1,FOXO3,FMN1,ACVR2A,PTEN,CHST11,FAM20C,MTHFD1L,ITPR1,NTNG2,ITGAV,MDM2,FRS2,ZHX2,JAG1,TGFBR1,BCL2L11,MYO3B,TRAF6,TIPARP,NFKB1,MAFB
GO:BP	positive regulation of mononuclear cell proliferation	GO:0032946	FALSE	0.00791231	2.1016967075147255	167	433	13	26944	CD86,VAV3,CD38,JAK2,IL1A,BCL6,CD274,MIF,H2-M2,RIPK2,TRAF6,IRS2,CD40
GO:BP	B cell proliferation	GO:0042100	FALSE	0.00793559	2.10042	118	433	11	26944	PLCL2,VAV3,CD38,LYN,BCL6,PTEN,MIF,NFKBIZ,CFB,IRS2,CD40
GO:BP	regulation of blood vessel endothelial cell migration	GO:0043535	FALSE	0.0081218	2.0903475745510693	96	433	10	26944	AKT3,HDAC9,NFE2L2,HIF1A,VEGFA,RGCC,PTGS2,HMOX1,CD40,APOE
GO:BP	proteolysis	GO:0006508	FALSE	0.00913726	2.039183788694935	1489	433	48	26944	FBXL5,TRAF3,FBXL17,RNF149,LRRK2,TANK,NFE2L2,APP,AMBRA1,RFFL,RNF217,NEDD4L,JAK2,MALT1,CPQ,RYBP,SRC,ADGB,ERN1,FBXO11,ARIH1,SRGN,CTSS,PTEN,IMMP2L,ADAM9,GCLC,MDM2,PIK3R1,NLRP3,SPSB1,F10,WAC,DISC1,RNF19B,CFB,ANPEP,RNF128,HTRA1,CST7,RAPGEF6,PTGS2,TREM2,ADAM19,UBD,APOE,MAFB,CTSB
GO:BP	regulation of prostaglandin secretion	GO:0032306	FALSE	0.0094124	2.0262994928809785	16	433	5	26944	PLA2G4A,IL1A,ACSL4,MIF,PTGES
GO:BP	calcium-mediated signaling	GO:0019722	FALSE	0.00974456	2.0112375528842965	225	433	15	26944	PTPRJ,EXOC4,CACNA1D,LRRK2,APP,NRG1,NFAT5,ITPR1,TRPM2,CMKLR1,FPR3,KSR2,TREM2,BST1,CCRL2
GO:BP	regulation of activated CD8-positive, alpha-beta T cell apoptotic process	GO:1905402	TRUE	0.00981436	2.0081382297971704	3	433	3	26944	ARG2,ST3GAL1,CD274
GO:BP	activated CD8-positive, alpha-beta T cell apoptotic process	GO:1905397	FALSE	0.00981436	2.0081382297971704	3	433	3	26944	ARG2,ST3GAL1,CD274
GO:BP	negative regulation of mast cell cytokine production	GO:0032764	TRUE	0.00981436	2.0081382297971704	3	433	3	26944	RABGEF1,BCL6,HMOX1
GO:BP	T cell differentiation	GO:0030217	FALSE	0.010136821455278824	1.9940982028760696	316	433	18	26944	ARID1B,CLEC4D,AMBRA1,MALT1,IL1A,AP3B1,BCL6,FOXO3,CLEC4E,BRAF,ZFP609,PSAP,NFKBIZ,NLRP3,PTPN2,RIPK2,MAFB,RSAD2
GO:BP	response to hydrogen peroxide	GO:0042542	FALSE	0.010142965699386912	1.9938350431719853	121	433	11	26944	NFE2L2,SDC1,SRC,ERN1,SOD2,KPNA4,BNIP3,ADAM9,MDM2,TRPM2,HMOX1
GO:BP	antigen processing and presentation	GO:0019882	FALSE	0.010142965699386912	1.9938350431719853	121	433	11	26944	EXT1,RAB8B,RFTN1,AP3B1,CTSS,PSAP,H2-M2,NOD2,TRAF6,TREM2,SLC11A1
GO:BP	neuroinflammatory response	GO:0150076	FALSE	0.0107231	1.9696783969557619	78	433	9	26944	ZEB2,LRRK2,APP,LARGE1,JAK2,MYO5A,CST7,PTGS2,TREM2
GO:BP	positive regulation of protein localization	GO:1903829	FALSE	0.011839676972689317	1.9266601465060298	523	433	24	26944	GNAQ,CACNA1D,APP,HIF1A,CD38,JAK2,EPB41L2,IL1A,SRC,VEGFA,MYO5A,TNFAIP6,JAK1,EPB41,PPARD,ACSL4,ITPR1,ADAM9,MDM2,TRPM2,PIK3R1,IRS2,PTGS2,TREM2
GO:BP	innate immune response activating cell surface receptor signaling pathway	GO:0002220	FALSE	0.011931828126468647	1.9232930111148574	79	433	9	26944	IRAK2,LYN,PIK3R1,NOD2,RIPK2,TRAF6,TREM2,CD14,CLEC4N
GO:BP	regulation of protein secretion	GO:0050708	FALSE	0.012065418683845199	1.9184576029778473	320	433	18	26944	GNAQ,NOS2,CACNA1D,HIF1A,CD38,JAK2,IL1A,MAP4K4,RFX3,PPARD,ACSL4,ITPR1,ADAM9,TRPM2,IRS2,TREM2,APOE,RSAD2
GO:BP	positive regulation of blood vessel endothelial cell migration	GO:0043536	FALSE	0.012230330009049557	1.9125618243066762	60	433	8	26944	AKT3,HDAC9,NFE2L2,HIF1A,VEGFA,PTGS2,HMOX1,CD40
GO:BP	angiogenesis	GO:0001525	FALSE	0.012534582730203019	1.901890118904535	561	433	25	26944	AKT3,ARHGAP24,HDAC9,SASH1,VAV3,NFE2L2,BCAS3,HIF1A,CLIC4,IL1A,VEGFA,NRP2,PTEN,JAK1,ITGAV,C3,RGCC,HK2,TGFBR1,ANPEP,CYBB,ARHGAP22,PTGS2,HMOX1,CD40
GO:BP	negative regulation of defense response	GO:0031348	FALSE	0.013387441037892965	1.8733024289125897	291	433	17	26944	AOAH,ARG2,RABGEF1,TNFAIP6,PTEN,PPARD,H2-M2,NLRP3,PTPN2,FPR3,NOD2,HTRA1,CST7,TREM2,NFKB1,APOE,IER3
GO:BP	gonad development	GO:0008406	FALSE	0.013387441037892965	1.8733024289125897	291	433	17	26944	PLA2G4A,IL1A,SDC1,SRC,FNDC3A,SGPL1,VEGFA,INHBA,ESR1,FOXO3,TNFAIP6,ACVR2A,IMMP2L,ITGAV,TGFBR1,BCL2L11,TIPARP
GO:BP	plasma membrane bounded cell projection morphogenesis	GO:0120039	FALSE	0.013539523322703778	1.8683966253084472	714	433	29	26944	EXT1,ABI1,ZEB2,RAPGEF2,RERE,RREB1,LRRK2,APP,DIAPH2,PDPN,NEDD4L,MALT1,SLC23A2,ALCAM,IFRD1,B4GALT5,SRC,SRGAP2,VEGFA,NRP2,PDLIM5,PTEN,SIPA1L1,BRAF,NTNG2,DST,DISC1,PTPRO,APOE
GO:BP	regulation of hormone levels	GO:0010817	FALSE	0.014023326737893154	1.8531489469596627	639	433	27	26944	GNAQ,NOS2,CACNA1D,RAB8B,HIF1A,CD38,JAK2,CPQ,NRG1,LYN,MAP4K4,SGPL1,INHBA,MYO5A,ESR1,RFX3,ACVR2A,PPARD,ACSL4,ITPR1,SLC16A10,SLC7A8,TRPM2,PAPSS2,IRS2,TIPARP,CTSB
GO:BP	regulation of lipid transport	GO:0032368	FALSE	0.014206816765736022	1.8475032208722255	150	433	12	26944	ABCA1,ACSL1,PLA2G4A,NRG1,IL1A,ACSL4,MIF,ITGAV,IRS2,TREM2,PTGES,APOE
GO:BP	immune effector process	GO:0002252	FALSE	0.014585652092838084	1.836074149744817	795	433	31	26944	PLCL2,CD86,APP,ST3GAL1,RFTN1,CLEC4D,RABGEF1,MALT1,LYN,BCL6,CLEC4E,PTEN,MIF,C3,NFKBIZ,H2-M2,RGCC,JAG1,LYST,NLRP3,RNF19B,CFB,NOD2,RIPK2,ITGAM,TRAF6,TREM2,HMOX1,SLC11A1,CD40,RSAD2
GO:BP	positive regulation of hemopoiesis	GO:1903708	FALSE	0.014590021204100896	1.8359440769333255	204	433	14	26944	ARID1B,AMBRA1,MALT1,AP3B1,BCL6,FOXO3,ATP11C,ZFP609,NFKBIZ,NLRP3,RIPK2,DCSTAMP,TRAF6,TREM2
GO:BP	positive regulation of leukocyte differentiation	GO:1902107	FALSE	0.014590021204100896	1.8359440769333255	204	433	14	26944	ARID1B,AMBRA1,MALT1,AP3B1,BCL6,FOXO3,ATP11C,ZFP609,NFKBIZ,NLRP3,RIPK2,DCSTAMP,TRAF6,TREM2
GO:BP	negative regulation of nucleobase-containing compound metabolic process	GO:0045934	FALSE	0.014714480918130749	1.8322550538747844	1651	433	51	26944	TRPS1,MITF,ETV6,PID1,FNIP2,ZEB2,RERE,RREB1,HDAC9,APP,RBM47,JARID2,FNIP1,HIF1A,CD38,NRG1,DYRK1A,CDYL2,RYBP,SRC,VEGFA,BCL6,FOXP4,ESR1,MDFIC,FOXO3,RFX3,TNKS,ZFHX3,ENTPD1,NCOA2,PPARD,PRDX5,CDYL,APOBEC1,SFMBT1,HIVEP1,GCLC,MDM2,ZHX2,ATXN1,TGFBR1,PTPN2,MXI1,RPS6KA5,TRAF6,SFMBT2,SLC11A1,NFKB1,IER3,TENT5C
GO:BP	regulation of endothelial cell migration	GO:0010594	FALSE	0.014992571007861798	1.8241238855784256	177	433	13	26944	AKT3,HDAC9,SASH1,NFE2L2,BCAS3,HIF1A,VEGFA,MET,RGCC,PTGS2,HMOX1,CD40,APOE
GO:BP	cellular lipid metabolic process	GO:0044255	FALSE	0.015237648002727866	1.8170820630663682	1041	433	37	26944	CDK8,CERS6,ACSL1,AOAH,HEXB,PLEK,PLA2G4A,ST3GAL1,SGMS2,PLA2G7,PDPN,UVRAG,B4GALT5,SGPL1,MYO5A,ESR1,ST3GAL3,LPCAT2,PTEN,PPARD,ACSL4,SLC22A4,MIF,APOBEC1,FABP5,C3,PSAP,AIG1,PIK3R1,PLD1,AGPS,IRS2,PTGS2,TBXAS1,PTGES,APOE,CHKA
GO:BP	regulation of canonical NF-kappaB signal transduction	GO:0043122	FALSE	0.015687012194575172	1.8044597658440875	234	433	15	26944	TRAF3,TANK,CLEC4D,IL1A,ESR1,NFAT5,TNIP1,NOD2,RIPK2,TRAF6,TREM2,UBD,CD40,ZC3HAV1,CLEC4N
GO:BP	cell projection morphogenesis	GO:0048858	FALSE	0.0162986	1.7878500211014847	721	433	29	26944	EXT1,ABI1,ZEB2,RAPGEF2,RERE,RREB1,LRRK2,APP,DIAPH2,PDPN,NEDD4L,MALT1,SLC23A2,ALCAM,IFRD1,B4GALT5,SRC,SRGAP2,VEGFA,NRP2,PDLIM5,PTEN,SIPA1L1,BRAF,NTNG2,DST,DISC1,PTPRO,APOE
GO:BP	regulation of actin filament-based process	GO:0032970	FALSE	0.016341834993142512	1.7866991789754683	393	433	20	26944	ZEB2,PLEK,PDPN,BCAS3,IL1A,CARMIL1,PDE4B,IQGAP2,FMN1,BRAF,SPECC1L,MET,TRPM2,RGCC,PIK3R1,SDC4,TGFBR1,SVIL,MYO3B,BST1
GO:BP	regeneration	GO:0031099	FALSE	0.016514635616343927	1.7821310042648437	235	433	15	26944	KPNA1,DIAPH2,LARGE1,JAK2,CPQ,NRG1,IFRD1,MAP4K4,PTEN,TEC,BRAF,PPARD,ITPR1,HMOX1,PTPN12
GO:BP	response to growth factor	GO:0070848	FALSE	0.016712272472307218	1.7769644923518948	761	433	30	26944	LDLRAD4,EXT1,ZEB2,RAPGEF2,WWOX,HIF1A,SRC,ERN1,VEGFA,NRP2,FOXO3,TNFAIP6,ZFHX3,ACVR2A,BRAF,CHST11,FAM20C,PDE8A,HIVEP1,ADAM9,GCLC,MDM2,NFKBIZ,FRS2,TGFBR1,HTRA1,DCSTAMP,NFKB1,PTPN12,CD63
GO:BP	response to angiotensin	GO:1990776	FALSE	0.0168206	1.7741582732506778	45	433	7	26944	ARID1B,NFE2L2,SRC,INHBA,CYBB,PTGS2,NFKB1
GO:BP	prostanoid biosynthetic process	GO:0046457	FALSE	0.016963	1.7704962988441897	30	433	6	26944	PLA2G4A,MIF,FABP5,PTGS2,TBXAS1,PTGES
GO:BP	prostaglandin biosynthetic process	GO:0001516	TRUE	0.016963	1.7704962988441897	30	433	6	26944	PLA2G4A,MIF,FABP5,PTGS2,TBXAS1,PTGES
GO:BP	hormone secretion	GO:0046879	FALSE	0.0169651	1.7704439150879412	394	433	20	26944	GNAQ,NOS2,CACNA1D,RAB8B,HIF1A,CD38,JAK2,NRG1,LYN,MAP4K4,INHBA,MYO5A,RFX3,ACVR2A,PPARD,ACSL4,ITPR1,SLC16A10,TRPM2,IRS2
GO:BP	regulation of anatomical structure size	GO:0090066	FALSE	0.016990582766204524	1.769791724850415	571	433	25	26944	EXT1,AKT3,PLEK,LRRK2,VAV3,HTR7,HIF1A,CD38,CARMIL1,IFRD1,VEGFA,SOD2,FMN1,PTEN,SPECC1L,PPARD,GCLC,DISC1,SVIL,RAP1GAP2,MYO3B,GCH1,PTGS2,TBXAS1,APOE
GO:BP	transmembrane transport	GO:0055085	FALSE	0.0172702	1.762701744673152	1525	433	48	26944	SLC8A1,OSBPL8,ABCA1,PID1,ACSL1,SLC7A2,CACNA1D,LRRC8C,SLCO3A1,SESTD1,SLC1A2,ARG2,NFE2L2,SLC7A11,LRRC8D,LARGE1,CLIC4,NEDD4L,SLC23A2,DAPK1,LYN,SLC2A1,PDE4B,FBXO11,SLC38A6,RHOQ,ESR1,CTSS,BRAF,SLC22A4,ITPR1,SLC16A10,FABP5,ITGAV,C3,SLC7A8,SH2B2,TRPM2,HK2,ABCC5,CYBB,HOMER1,IRS2,TREM2,SLC11A1,SLC41A2,STRA6L,CD63
GO:BP	regulation of cell junction assembly	GO:1901888	FALSE	0.0173809	1.7599273713111925	236	433	15	26944	PTPRJ,RAPGEF2,APP,NEDD4L,NRG1,SRC,VEGFA,PDLIM5,FMN1,PTEN,SIPA1L1,NTNG2,PEAK1,PIK3R1,SDC4
GO:BP	regulation of chemotaxis	GO:0050920	FALSE	0.0173809	1.7599273713111925	236	433	15	26944	CAMK1D,PTPRJ,APP,PLA2G7,LYN,VEGFA,TNFAIP6,MIF,MET,CMKLR1,PTPN2,FPR3,NOD2,TREM2,BST1
GO:BP	dendritic spine development	GO:0060996	FALSE	0.0174865	1.7572971853105588	128	433	11	26944	LRRK2,ASAP1,SRGAP2,PDLIM5,PTEN,SIPA1L1,ACSL4,IQSEC1,ARF4,DISC1,APOE
GO:BP	canonical Wnt signaling pathway	GO:0060070	FALSE	0.017521733094554084	1.756422939482074	297	433	17	26944	KPNA1,GNAQ,EXT1,ZEB2,LRRK2,APP,SDC1,SRC,FOXO3,STK3,TNKS,PTEN,DISC1,TMEM170B,NFKB1,PTPRO,APOE
GO:BP	cell surface toll-like receptor signaling pathway	GO:0140895	FALSE	0.0177508	1.750780950699251	63	433	8	26944	IRAK2,LYN,PIK3R1,NOD2,RIPK2,TRAF6,TREM2,CD14
GO:BP	response to hydroperoxide	GO:0033194	FALSE	0.017979122466199163	1.7452315093429398	18	433	5	26944	CD38,JAK2,DAPK1,TRPM2,MGST1
GO:BP	negative regulation of cytokine production	GO:0001818	FALSE	0.018312368630276715	1.7372554778431426	298	433	17	26944	HDAC9,ARG2,RABGEF1,BCL6,CD274,SRGN,GPNMB,RGCC,CMKLR1,NLRP3,RNF128,NOD2,TREM2,HMOX1,SLC11A1,NFKB1,MERTK
GO:BP	positive regulation of vasculature development	GO:1904018	FALSE	0.019114775716880274	1.7186307934070628	181	433	13	26944	AKT3,SASH1,NFE2L2,HIF1A,IL1A,VEGFA,JAK1,C3,HK2,TGFBR1,CYBB,HMOX1,CD40
GO:BP	regulation of neuron apoptotic process	GO:0043523	FALSE	0.019134819099922228	1.7181756392287122	299	433	17	26944	APP,AMBRA1,HIF1A,JAK2,CPEB4,GBE1,ESR1,FOXO3,HSPH1,SOD2,MAP2K4,BRAF,GCLC,BCL2L11,TREM2,HMOX1,APOE
GO:BP	sex differentiation	GO:0007548	FALSE	0.019360147515157973	1.7130913378966834	364	433	19	26944	PLA2G4A,IL1A,SDC1,LHFPL2,SRC,FNDC3A,SGPL1,VEGFA,INHBA,ESR1,FOXO3,TNFAIP6,ACVR2A,IMMP2L,ITGAV,TGFBR1,BCL2L11,TIPARP,MERTK
GO:BP	multicellular organismal-level chemical homeostasis	GO:0140962	FALSE	0.019885707601921418	1.701458950710575	84	433	9	26944	FBXL5,EXT1,BTBD9,PLA2G4A,VEGFA,SOD2,NFAT5,HMOX1,SLC11A1
GO:BP	positive regulation of protein secretion	GO:0050714	FALSE	0.020289749399248803	1.6927233169486904	182	433	13	26944	GNAQ,CACNA1D,HIF1A,CD38,JAK2,IL1A,PPARD,ACSL4,ITPR1,ADAM9,TRPM2,IRS2,TREM2
GO:BP	epithelial cell development	GO:0002064	FALSE	0.0212646	1.6723424291038826	240	433	15	26944	MYO1E,RAPGEF2,HIF1A,CLIC4,IL1A,SDC1,SRC,FNDC3A,VEGFA,ESR1,RFX3,MET,PSAP,FRS2,JAG1
GO:BP	amino acid transmembrane transport	GO:0003333	FALSE	0.021629377588933463	1.6649559777213745	107	433	10	26944	SLC7A2,LRRC8C,SLC1A2,ARG2,SLC7A11,LRRC8D,SLC38A6,SLC22A4,SLC7A8,SLC11A1
GO:BP	cellular response to growth factor stimulus	GO:0071363	FALSE	0.021688877998843073	1.6637629141690613	732	433	29	26944	LDLRAD4,EXT1,ZEB2,RAPGEF2,WWOX,HIF1A,SRC,ERN1,VEGFA,NRP2,FOXO3,TNFAIP6,ACVR2A,BRAF,CHST11,FAM20C,PDE8A,HIVEP1,ADAM9,GCLC,MDM2,NFKBIZ,FRS2,TGFBR1,HTRA1,DCSTAMP,NFKB1,PTPN12,CD63
GO:BP	organophosphate metabolic process	GO:0019637	FALSE	0.0222867	1.6519533636233803	1017	433	36	26944	GPHN,PID1,ACSL1,PDE7B,HEXB,PLEK,LRRK2,APP,PLA2G4A,SGMS2,PLA2G7,UVRAG,HIF1A,PDE4B,RHOQ,GPD2,LPCAT2,ENTPD1,PTEN,PPARD,PRDX5,ACSL4,PDE8A,FABP5,PIK3R1,HK2,PLD1,TXNRD1,ACPP,KYNU,RBKS,PAPSS2,DPYS,TREM2,IER3,CHKA
GO:BP	development of primary female sexual characteristics	GO:0046545	FALSE	0.023485383739095044	1.6292023392742205	132	433	11	26944	PLA2G4A,LHFPL2,SRC,SGPL1,VEGFA,INHBA,ESR1,FOXO3,TNFAIP6,IMMP2L,TIPARP
GO:BP	negative regulation of leukocyte activation	GO:0002695	FALSE	0.0242055	1.6160851091424862	185	433	13	26944	ARG2,RABGEF1,CBLB,LYN,BCL6,CD274,PTEN,GPNMB,PAG1,SDC4,PTPN2,CST7,MERTK
GO:BP	regulation of small molecule metabolic process	GO:0062012	FALSE	0.024382305601580917	1.612925229697932	370	433	19	26944	PID1,PLEK,APP,PLA2G4A,SLC7A11,HIF1A,SRC,CLYBL,ENTPD1,NCOA2,PPARD,ACSL4,FABP5,PTPN2,IRS2,PTGS2,TREM2,APOE,IER3
GO:BP	regulation of B cell proliferation	GO:0030888	FALSE	0.025242128906001943	1.597874019747273	66	433	8	26944	VAV3,CD38,LYN,BCL6,PTEN,MIF,IRS2,CD40
GO:BP	regulation of intrinsic apoptotic signaling pathway	GO:2001242	FALSE	0.025651118491423368	1.5908936931618083	186	433	13	26944	LRRK2,NFE2L2,APP,HIF1A,SRC,SOD2,GRINA,MIF,MDM2,PTPN2,BCL2L11,PTGS2,TREM2
GO:BP	Wnt signaling pathway	GO:0016055	FALSE	0.0256847	1.590326342375668	440	433	21	26944	MITF,KPNA1,GNAQ,EXT1,ZEB2,LRRK2,APP,WWOX,SDC1,SRC,MDFIC,FOXO3,NXN,STK3,TNKS,PTEN,DISC1,TMEM170B,NFKB1,PTPRO,APOE
GO:BP	dendrite development	GO:0016358	FALSE	0.0258809	1.5870202329133247	306	433	17	26944	CAMK1D,ABI1,RAPGEF2,RERE,LRRK2,APP,ASAP1,NEDD4L,SRGAP2,PDLIM5,PTEN,SIPA1L1,ACSL4,IQSEC1,ARF4,DISC1,APOE
GO:BP	positive regulation of lymphocyte differentiation	GO:0045621	FALSE	0.027104968227568048	1.566951097462891	134	433	11	26944	ARID1B,AMBRA1,MALT1,AP3B1,BCL6,FOXO3,ATP11C,ZFP609,NFKBIZ,NLRP3,RIPK2
GO:BP	cell-cell signaling by wnt	GO:0198738	FALSE	0.027495104783285578	1.5607446208915035	442	433	21	26944	MITF,KPNA1,GNAQ,EXT1,ZEB2,LRRK2,APP,WWOX,SDC1,SRC,MDFIC,FOXO3,NXN,STK3,TNKS,PTEN,DISC1,TMEM170B,NFKB1,PTPRO,APOE
GO:BP	superoxide metabolic process	GO:0006801	FALSE	0.0282664	1.5487289401076105	67	433	8	26944	NOS2,NFE2L2,APP,SOD2,IMMP2L,CYBB,ITGAM,GCH1
GO:BP	cell surface pattern recognition receptor signaling pathway	GO:0002752	FALSE	0.0282664	1.5487289401076105	67	433	8	26944	IRAK2,LYN,PIK3R1,NOD2,RIPK2,TRAF6,TREM2,CD14
GO:BP	icosanoid transport	GO:0071715	FALSE	0.0282664	1.5487289401076105	67	433	8	26944	NOS2,SLCO3A1,PLA2G4A,IL1A,ACSL4,MIF,PTGS2,PTGES
GO:BP	T cell proliferation	GO:0042098	FALSE	0.0285405	1.5445389851048157	246	433	15	26944	CD86,ARG2,JAK2,MALT1,IL1A,CBLB,BCL6,CD274,PTEN,GPNMB,H2-M2,SDC4,RIPK2,TRAF6,SLC11A1
GO:BP	temperature homeostasis	GO:0001659	FALSE	0.028771927885335623	1.541031036896208	188	433	13	26944	ACSL1,PLCL2,JAK2,IL1A,VEGFA,ZFP516,FABP5,TRPM2,CMKLR1,KSR2,NOD2,PTGS2,PTGES
GO:BP	cytoskeleton organization	GO:0007010	FALSE	0.029352347024041145	1.5323571666876752	1466	433	46	26944	FMNL2,MYO1E,ZEB2,ARHGAP10,PLEK,SIK3,DIAPH2,BCAS3,UVRAG,PSTPIP2,LARGE1,EPB41L2,ELMO1,IL1A,DYRK1A,MRTFA,CARMIL1,SRC,SRGAP2,BCL6,PDLIM5,IQGAP2,MYO5A,RHOQ,HSPH1,SH3KBP1,FMN1,NOS1AP,PTEN,SIPA1L1,BRAF,SPECC1L,EPB41,MET,IQSEC1,SH2B2,TRPM2,RGCC,PIK3R1,SDC4,TGFBR1,DST,DISC1,SVIL,MYO3B,BST1
GO:BP	regulation of Wnt signaling pathway	GO:0030111	FALSE	0.029371991817015882	1.5320666014578679	309	433	17	26944	KPNA1,GNAQ,ZEB2,LRRK2,APP,WWOX,SRC,MDFIC,FOXO3,NXN,STK3,TNKS,DISC1,TMEM170B,NFKB1,PTPRO,APOE
GO:BP	positive regulation of cell-substrate junction organization	GO:0150117	FALSE	0.030377172713795662	1.5174526495626453	33	433	6	26944	PTPRJ,VEGFA,FMN1,IQSEC1,PIK3R1,SDC4
GO:BP	positive regulation of lipopolysaccharide-mediated signaling pathway	GO:0031666	FALSE	0.030462768109089884	1.5162306354753068	10	433	4	26944	SASH1,MIF,TRAF6,CD14
GO:BP	toll-like receptor signaling pathway	GO:0002224	FALSE	0.0315902	1.500447929929782	68	433	8	26944	TRAF3,CD86,APP,AP3B1,ESR1,NFKBIZ,TNIP1,CD40
GO:BP	positive regulation of B cell activation	GO:0050871	FALSE	0.0319927	1.4949495001947533	89	433	9	26944	VAV3,CD38,BCL6,SH3KBP1,ATP11C,MIF,NOD2,IRS2,CD40
GO:BP	adaptive immune response based on somatic recombination of immune receptors built from immunoglobulin superfamily domains	GO:0002460	FALSE	0.0325357	1.487639767031475	447	433	21	26944	PLA2G4A,RFTN1,JAK2,MALT1,VEGFA,BCL6,CD274,C3,NFKBIZ,H2-M2,JAG1,NLRP3,CFB,NOD2,RIPK2,TRAF6,TREM2,SLC11A1,CD40,RSAD2,CLEC4N
GO:BP	forebrain development	GO:0030900	FALSE	0.0325357	1.487639767031475	447	433	21	26944	GNAQ,EXT1,ZEB2,RAPGEF2,LRRK2,SLC1A2,APP,SLC7A11,HIF1A,LARGE1,NRG1,MRTFA,SLC2A1,SRC,SRGAP2,INHBA,NRP2,PTEN,BNIP3,FRS2,DISC1
GO:BP	carbohydrate homeostasis	GO:0033500	FALSE	0.033277849943096245	1.4778447409153619	312	433	17	26944	PTPRJ,CACNA1D,LRRC8D,HIF1A,MAP4K4,MBD5,ERN1,FOXO3,PPARD,FABP5,GCLC,SH2B2,PIK3R1,HK2,PTPN2,IRS2,TREM2
GO:BP	glucose homeostasis	GO:0042593	FALSE	0.033277849943096245	1.4778447409153619	312	433	17	26944	PTPRJ,CACNA1D,LRRC8D,HIF1A,MAP4K4,MBD5,ERN1,FOXO3,PPARD,FABP5,GCLC,SH2B2,PIK3R1,HK2,PTPN2,IRS2,TREM2
GO:BP	response to antibiotic	GO:0046677	FALSE	0.0345514	1.461534399089649	50	433	7	26944	PLA2G4A,HIF1A,JAK2,RSRC1,HDAC8,JAK1,MDM2
GO:BP	negative regulation of molecular function	GO:0044092	FALSE	0.0345786	1.4611923360528782	281	433	16	26944	TRAF3,PTPRJ,LRCH1,RFFL,LYN,ESR1,MED13,ITGAV,CMKLR1,NLRP3,PTPN2,DISC1,CST7,IRS2,PTGS2,PTPRO
GO:BP	regulation of neuron projection development	GO:0010975	FALSE	0.0346523	1.4602682864368695	558	433	24	26944	CAMK1D,ZEB2,RAPGEF2,LRRK2,HTR7,NFE2L2,DIAPH2,CD38,NEDD4L,NRG1,LYN,IFRD1,MAP4K4,VEGFA,PDLIM5,PTEN,SIPA1L1,BRAF,ITPR1,NTNG2,MDM2,DISC1,RAP1GAP2,APOE
GO:BP	regulation of extrinsic apoptotic signaling pathway	GO:2001236	FALSE	0.035250703378678784	1.4528322128447466	164	433	12	26944	APP,WWOX,RFFL,NRG1,SRC,INHBA,STK3,PTEN,ITGAV,GCLC,TGFBR1,HMOX1
GO:BP	female sex differentiation	GO:0046660	FALSE	0.035250703378678784	1.4528322128447466	164	433	12	26944	PLA2G4A,LHFPL2,SRC,SGPL1,VEGFA,INHBA,ESR1,FOXO3,TNFAIP6,IMMP2L,TIPARP,MERTK
GO:BP	regulation of B cell activation	GO:0050864	FALSE	0.0358214	1.4458578230707293	138	433	11	26944	VAV3,CD38,LYN,BCL6,SH3KBP1,ATP11C,PTEN,MIF,NOD2,IRS2,CD40
GO:BP	cell-substrate junction assembly	GO:0007044	FALSE	0.038350242391233434	1.4162318867647403	91	433	9	26944	PTPRJ,SRC,VEGFA,FMN1,PTEN,PEAK1,ITGAV,SDC4,DST
GO:BP	positive regulation of non-canonical NF-kappaB signal transduction	GO:1901224	FALSE	0.039230835939484246	1.406372437727276	70	433	8	26944	CD86,SASH1,APP,NFAT5,NLRP3,NOD2,TRAF6,TREM2
GO:BP	icosanoid secretion	GO:0032309	FALSE	0.0394988	1.4034155686285295	51	433	7	26944	NOS2,PLA2G4A,IL1A,ACSL4,MIF,PTGS2,PTGES
GO:BP	erythrocyte homeostasis	GO:0034101	FALSE	0.0398156	1.3999464011129499	166	433	12	26944	HIF1A,JAK2,LYN,VEGFA,INHBA,BCL6,FOXO3,ACVR2A,PTPN2,HMOX1,ALAS1,MAFB
GO:BP	positive regulation of establishment of protein localization	GO:1904951	FALSE	0.040734592010315276	1.3900366291399122	350	433	18	26944	GNAQ,CACNA1D,APP,HIF1A,CD38,JAK2,IL1A,SRC,PPARD,ACSL4,ITPR1,ADAM9,MDM2,TRPM2,PIK3R1,IRS2,PTGS2,TREM2
GO:BP	positive regulation of insulin secretion	GO:0032024	FALSE	0.0409463	1.3877851644086228	115	433	10	26944	GNAQ,CACNA1D,HIF1A,CD38,JAK2,PPARD,ACSL4,ITPR1,TRPM2,IRS2
GO:BP	reactive nitrogen species metabolic process	GO:2001057	FALSE	0.0419127	1.3776545372757176	92	433	9	26944	NOS2,SLC7A2,APP,JAK2,ESR1,SOD2,ACVR2A,PRDX5,PTGS2
GO:BP	oxoacid metabolic process	GO:0043436	FALSE	0.0436742	1.3597746140985105	965	433	34	26944	NOS2,ACSL1,AOAH,HEXB,ARG2,APP,PLA2G4A,ST3GAL1,PDPN,SLC7A11,HIF1A,SLC23A2,SGPL1,MYO5A,PPARD,MTHFD1L,ACSL4,MIF,FABP5,C3,GCLC,AIG1,GLS,HK2,TXNRD1,BCKDHB,KYNU,PAPSS2,IRS2,PTGS2,DPYS,TBXAS1,PTGES,IER3
GO:BP	actin filament organization	GO:0007015	FALSE	0.0437487	1.3590349334890084	456	433	21	26944	MYO1E,ZEB2,PLEK,DIAPH2,PSTPIP2,ELMO1,CARMIL1,SRC,IQGAP2,MYO5A,RHOQ,SH3KBP1,FMN1,BRAF,SPECC1L,MET,RGCC,PIK3R1,SDC4,TGFBR1,SVIL
GO:BP	rhythmic process	GO:0048511	TRUE	0.0439467	1.3570739373278369	352	433	18	26944	NOS2,PHLPP1,FBXL17,HTR7,BTBD9,PLA2G4A,DYRK1A,SRC,SGPL1,INHBA,ESR1,FOXO3,TNFAIP6,PTEN,NCOA2,ENOX2,HOMER1,GPR176
GO:BP	regulation of phagocytosis	GO:0050764	FALSE	0.0441762	1.3548111740015676	116	433	10	26944	CAMK1D,PTPRJ,PTEN,ITGAV,C3,FPR3,NOD2,TREM2,SLC11A1,MERTK
GO:BP	positive regulation of glucose transmembrane transport	GO:0010828	FALSE	0.0450171	1.3466220928396013	52	433	7	26944	OSBPL8,SLC1A2,NFE2L2,RHOQ,BRAF,C3,IRS2
GO:BP	tolerance induction	GO:0002507	FALSE	0.0450171	1.3466220928396013	52	433	7	26944	PHLPP1,CD86,CBLB,LYN,CD274,H2-M2,ACOD1
GO:BP	muscle cell apoptotic process	GO:0010657	FALSE	0.0476226	1.322186479861889	117	433	10	26944	NFE2L2,AMBRA1,JAK2,NRG1,SOD2,MAP2K4,PTEN,BNIP3,PIK3R1,HMOX1
GO:BP	positive regulation of catalytic activity	GO:0043085	FALSE	0.0479262	1.3194273707099398	321	433	17	26944	DENND1A,RAPGEF2,CACNA1D,CD86,TANK,ASAP1,BCAS3,JAK2,ERN1,SRGAP2,VEGFA,ESR1,PTEN,SIPA1L1,MIF,NLRP3,APOE
GO:BP	organic acid metabolic process	GO:0006082	FALSE	0.0495385	1.3050570667644945	971	433	34	26944	NOS2,ACSL1,AOAH,HEXB,ARG2,APP,PLA2G4A,ST3GAL1,PDPN,SLC7A11,HIF1A,SLC23A2,SGPL1,MYO5A,PPARD,MTHFD1L,ACSL4,MIF,FABP5,C3,GCLC,AIG1,GLS,HK2,TXNRD1,BCKDHB,KYNU,PAPSS2,IRS2,PTGS2,DPYS,TBXAS1,PTGES,IER3
GO:BP	supramolecular fiber organization	GO:0097435	FALSE	0.049864323525436946	1.3022100683546225	806	433	30	26944	EXT1,MYO1E,ZEB2,PLEK,APP,DIAPH2,PSTPIP2,P4HA1,ELMO1,DYRK1A,CARMIL1,SRC,IQGAP2,MYO5A,RHOQ,SH3KBP1,TNFAIP6,FMN1,BRAF,SPECC1L,MET,MDM2,RGCC,PIK3R1,SDC4,TGFBR1,SVIL,TREM2,SERF1,APOE
KEGG	Lipid and atherosclerosis	KEGG:05417	FALSE	3.35453e-05	4.474368535722072	216	251	21	9330	ABCA1,TRAF3,AKT3,TANK,VAV3,NFE2L2,JAK2,LYN,SRC,ERN1,SOD2,MAP2K4,ITPR1,PIK3R1,NLRP3,CYBB,OLR1,TRAF6,NFKB1,CD40,CD14
KEGG	EGFR tyrosine kinase inhibitor resistance	KEGG:01521	FALSE	0.000118323	3.9269316112324417	79	251	12	9330	AKT3,JAK2,NRG1,SRC,VEGFA,FOXO3,PTEN,BRAF,JAK1,MET,PIK3R1,BCL2L11
KEGG	Tuberculosis	KEGG:05152	FALSE	0.000683938	3.1649834080557766	180	251	17	9330	NOS2,AKT3,IRAK2,JAK2,MALT1,IL1A,SRC,CTSS,CLEC4E,JAK1,C3,NOD2,RIPK2,ITGAM,TRAF6,NFKB1,CD14
KEGG	Pathways in cancer	KEGG:05200	FALSE	0.000876007	3.0574925817337104	543	251	33	9330	MITF,GNAQ,NOS2,TRAF3,AKT3,GNG12,NFE2L2,HIF1A,JAK2,DAPK1,SLC2A1,VEGFA,ESR1,PTEN,BRAF,JAK1,PPARD,MET,ITGAV,MDM2,JAG1,PIK3R1,PLD1,TGFBR1,BCL2L11,RPS6KA5,TXNRD1,MGST1,EGLN3,TRAF6,PTGS2,HMOX1,NFKB1
KEGG	Ferroptosis	KEGG:04216	FALSE	0.000926748	3.0330381325261433	40	251	8	9330	ACSL1,SLC7A11,FTH1,ACSL4,GCLC,CYBB,HMOX1,FTL1
KEGG	C-type lectin receptor signaling pathway	KEGG:04625	FALSE	0.000932658	3.030277742525336	112	251	13	9330	AKT3,CLEC4D,MALT1,CBLB,SRC,CLEC4E,ITPR1,MDM2,PIK3R1,NLRP3,PTGS2,NFKB1,CLEC4N
KEGG	Leishmaniasis	KEGG:05140	FALSE	0.00164801	2.7830389823455977	70	251	10	9330	NOS2,JAK2,IL1A,JAK1,C3,CYBB,ITGAM,TRAF6,PTGS2,NFKB1
KEGG	Fluid shear stress and atherosclerosis	KEGG:05418	FALSE	0.00381705	2.418272542354224	146	251	14	9330	AKT3,NFE2L2,IL1A,SDC1,SRC,VEGFA,ACVR2A,MAP2K4,ITGAV,PIK3R1,SDC4,MGST1,HMOX1,NFKB1
KEGG	Autophagy - animal	KEGG:04140	FALSE	0.00405881	2.3916	166	251	15	9330	AKT3,ATG10,TANK,AMBRA1,UVRAG,HIF1A,DAPK1,ERN1,PTEN,BNIP3,ITPR1,PIK3R1,TRAF6,IRS2,CTSB
KEGG	FoxO signaling pathway	KEGG:04068	FALSE	0.00506468	2.295447876638354	131	251	13	9330	AKT3,BCL6,FOXO3,SOD2,PTEN,BRAF,BNIP3,MDM2,PIK3R1,TGFBR1,BCL2L11,HOMER1,IRS2
KEGG	Kaposi sarcoma-associated herpesvirus infection	KEGG:05167	FALSE	0.00729962	2.1366998033352576	216	251	17	9330	TRAF3,AKT3,GNG12,CD86,HIF1A,JAK2,LYN,SRC,VEGFA,MAP2K4,JAK1,ITPR1,C3,H2-M2,PIK3R1,PTGS2,NFKB1
KEGG	Chemical carcinogenesis - reactive oxygen species	KEGG:05208	FALSE	0.010251347476548435	1.9892190455187422	222	251	17	9330	AKT3,PTPRJ,NFE2L2,HIF1A,SRC,VEGFA,FOXO3,SOD2,MAP2K4,PTEN,BRAF,MET,PIK3R1,PLD1,MGST1,HMOX1,NFKB1
KEGG	Proteoglycans in cancer	KEGG:05205	FALSE	0.012426887193901096	1.9056376439901421	204	251	16	9330	AKT3,VAV3,HIF1A,SDC1,SRC,VEGFA,ESR1,BRAF,ITPR1,MET,ITGAV,MDM2,FRS2,PIK3R1,SDC4,CD63
KEGG	HIF-1 signaling pathway	KEGG:04066	FALSE	0.022905212624378245	1.6400656724028246	113	251	11	9330	NOS2,AKT3,HIF1A,SLC2A1,VEGFA,PIK3R1,HK2,EGLN3,CYBB,HMOX1,NFKB1
KEGG	Thyroid hormone signaling pathway	KEGG:04919	FALSE	0.038760303375309516	1.411612832402819	120	251	11	9330	AKT3,HIF1A,SLC2A1,SRC,ESR1,NCOA2,MED13,SLC16A10,ITGAV,MDM2,PIK3R1
KEGG	Efferocytosis	KEGG:04148	FALSE	0.040693090600461196	1.3904793246526321	161	251	13	9330	ABCA1,ARG2,HIF1A,JAK2,ELMO1,SLC2A1,ATP11C,DOCK1,PPARD,ADAM9,ITGAV,PTGS2,MERTK
KEGG	Neurotrophin signaling pathway	KEGG:04722	FALSE	0.041641702098678984	1.3804715270732177	121	251	11	9330	AKT3,IRAK2,FOXO3,BRAF,FRS2,SH2B2,PIK3R1,RPS6KA5,RIPK2,TRAF6,NFKB1
KEGG	Toll-like receptor signaling pathway	KEGG:04620	FALSE	0.045066706963134195	1.3461441747887717	103	251	10	9330	TRAF3,AKT3,CD86,MAP2K4,JAK1,PIK3R1,TRAF6,NFKB1,CD40,CD14
KEGG	Renal cell carcinoma	KEGG:05211	FALSE	0.0465291	1.3322749136775605	68	251	8	9330	AKT3,HIF1A,SLC2A1,VEGFA,BRAF,MET,PIK3R1,EGLN3
