# Supplementary material for: CD38+ Alveolar macrophages mediate early control of M. tuberculosis proliferation in the lung
Source: Research Square preprint supplement (doi:10.21203/rs.3.rs-3934768/v1), 2024-07-15
Supplement: Supplementary file 2 [file 1c790fc2c5c529c072834ddf.xlsx]

## Sheet: cd38postive TR-AM DGE
NEGATIVE LFC - GENES UPREGULATED IN CD38- AMs
	p_val	avg_log2FC	pct.1	pct.2	p_val_adj
Scgb1a1	0.0884413	-1.93291	0.03	0.039	1
Chil3	7.12e-185	-1.89695	0.313	0.664	1.61e-180
Marco	2.87e-56	-1.75253	0.085	0.245	6.49e-52
Hbb-bs	0.123481	-1.67388	0.044	0.053	1
Plet1	3.84e-73	-1.40379	0.203	0.4	8.69e-69
Ccl6	1.95e-91	-1.35214	0.342	0.579	4.4e-87
Car4	4.34e-35	-1.20487	0.072	0.186	9.82e-31
Krt79	7.47e-49	-1.1472	0.064	0.201	1.69e-44
Ear2	8.03e-44	-1.05028	0.065	0.192	1.82e-39
Hba-a1	0.54103	-1.01821	0.014	0.017	1
Laptm5	2.58e-141	-1.00748	0.819	0.867	5.84e-137
Mcemp1	2.07e-56	-0.997689	0.447	0.573	4.68e-52
Ccnd2	1.6e-25	-0.995672	0.164	0.263	3.62e-21
Trf	1.35e-30	-0.990457	0.183	0.296	3.05e-26
Wfdc21	2.73e-38	-0.989753	0.246	0.386	6.18e-34
Hebp1	1.66e-28	-0.931347	0.229	0.336	3.75e-24
Klhdc4	2.39e-28	-0.909427	0.32	0.419	5.42e-24
Anxa2	2.43e-39	-0.877293	0.394	0.513	5.49e-35
Cd9	2.74e-59	-0.849492	0.483	0.63	6.21e-55
Lpl	1.02e-44	-0.827339	0.37	0.543	2.31e-40
Hba-a2	0.490636	-0.814176	0.015	0.013	1
Slamf9	3.07e-24	-0.811329	0.073	0.161	6.95e-20
Mrc1	2.16e-22	-0.794196	0.084	0.168	4.9e-18
Arpc4	6.52e-17	-0.786905	0.295	0.375	1.47e-12
Dhrs7b	2.38e-16	-0.786474	0.146	0.222	5.39e-12
Ms4a8a	3.44e-11	-0.762135	0.17	0.222	7.79e-07
Crip1	4.94e-34	-0.738271	0.53	0.625	1.12e-29
Gdf15	2.52e-12	-0.713745	0.051	0.103	5.7e-08
Sept9	2.24e-11	-0.697488	0.189	0.249	5.06e-07
Nme1	1.55e-15	-0.694084	0.326	0.392	3.5e-11
Ch25h	9.04e-06	-0.691599	0.15	0.184	0.204619
Naaa	9.78e-16	-0.688392	0.351	0.41	2.21e-11
Ltc4s	7.01e-15	-0.679205	0.062	0.121	1.59e-10
Tkt	4.45e-26	-0.671164	0.489	0.558	1.01e-21
Cyb561a3	7.22e-13	-0.657773	0.115	0.175	1.63e-08
Etfb	8.15e-10	-0.657331	0.229	0.275	1.84e-05
Vamp8	1.46e-45	-0.654604	0.653	0.734	3.3e-41
Taldo1	7.96e-22	-0.642775	0.457	0.526	1.8e-17
Rhoc	3.78e-08	-0.622766	0.203	0.244	0.000854758
Psmd13	1.09e-09	-0.621143	0.364	0.398	2.47e-05
Ifi27l2a	1.38e-21	-0.615988	0.12	0.217	3.11e-17
Lsp1	4.09e-20	-0.59795	0.06	0.137	9.25e-16
Reep5	8.29e-22	-0.59708	0.503	0.562	1.87e-17
Lypla2	1.29e-10	-0.596959	0.226	0.286	2.93e-06
Hbb-bt	0.30467	-0.593944	0.007	0.009	1
F7	9.66e-18	-0.587664	0.333	0.416	2.19e-13
Mgll	1.75e-09	-0.580166	0.236	0.288	3.95e-05
Ctsk	7.44e-38	-0.56394	0.299	0.492	1.68e-33
Mcrip1	2.08e-08	-0.563278	0.215	0.264	0.00047024
Cd44	7.56e-28	-0.560664	0.578	0.642	1.71e-23
Abcg1	7.52e-07	-0.558901	0.287	0.319	0.0170238
Arf5	4.93e-21	-0.55538	0.603	0.646	1.12e-16
Adipor2	3.84e-06	-0.551741	0.138	0.172	0.0868603
Atp6v0d2	1.9e-10	-0.54555	0.291	0.348	4.3e-06
Copz1	2.27e-06	-0.54437	0.229	0.266	0.0512688
Aprt	6.58e-16	-0.532916	0.478	0.528	1.49e-11
F11r	0.0124662	-0.52886	0.159	0.171	1
Arpc5	5.25e-11	-0.518638	0.455	0.493	1.19e-06
Serpinb6a	0.00111708	-0.512745	0.177	0.195	1
Ramp1	2.82e-19	-0.512562	0.022	0.079	6.37e-15
Tmbim1	0.000113201	-0.504832	0.196	0.222	1
Dbi	1.35e-07	-0.504667	0.362	0.388	0.00304571
mt-Nd1	5.74e-32	-0.494074	0.916	0.905	1.3e-27
H2-DMb1	2.24e-16	-0.492638	0.544	0.587	5.07e-12
mt-Nd2	3.04e-32	-0.490099	0.866	0.86	6.89e-28
Fabp4	3.11e-14	-0.483246	0.029	0.079	7.03e-10
Mapk3	6.82e-06	-0.482926	0.321	0.344	0.154247
Actb	7.99e-62	-0.479975	0.961	0.974	1.81e-57
Rplp1	3.43e-79	-0.476654	0.934	0.953	7.76e-75
Il11ra1	0.00381216	-0.474147	0.322	0.327	1
Hmgn1	0.00919897	-0.473975	0.133	0.148	1
Unc119	0.000110547	-0.471997	0.149	0.175	1
Ccl9	0.000255292	-0.47183	0.22	0.251	1
Tcf7l2	0.000132011	-0.469668	0.2	0.229	1
Cd164	0.00816367	-0.463576	0.234	0.242	1
Arl6ip1	2.05e-07	-0.460152	0.422	0.441	0.00464296
Rpsa	2.35e-34	-0.451501	0.832	0.872	5.31e-30
Fcgrt	2.89e-05	-0.450138	0.078	0.107	0.653597
Akr1a1	9.15e-12	-0.440097	0.5	0.537	2.07e-07
Ly6e	5.92e-25	-0.438859	0.675	0.713	1.34e-20
Atp6v0a1	0.0137691	-0.438182	0.105	0.121	1
Flt1	0.0320675	-0.433355	0.24	0.245	1
C4b	0.000210704	-0.433154	0.132	0.162	1
Myl6	3.46e-29	-0.431866	0.734	0.766	7.83e-25
Abhd12	0.000710698	-0.430831	0.197	0.218	1
Dhcr24	1.49e-18	-0.430035	0.019	0.072	3.37e-14
Plekhm2	0.0646626	-0.429554	0.235	0.239	1
Akr1b3	0.000491538	-0.426996	0.145	0.17	1
Dnase2a	0.0801694	-0.426777	0.286	0.282	1
Cyb5r3	0.0286133	-0.417272	0.288	0.286	1
Acads	0.0140339	-0.416646	0.139	0.153	1
Pdlim1	1.62e-07	-0.414337	0.063	0.101	0.00367021
Gnl1	0.00371795	-0.41244	0.204	0.223	1
Pomp	7.56e-11	-0.412122	0.538	0.564	1.71e-06
Msrb1	1.07e-12	-0.41151	0.558	0.591	2.41e-08
Mvd	0.0604464	-0.411228	0.154	0.16	1
Serpina3g	0.000113932	-0.408093	0.408	0.423	1
Dmxl2	0.13152	-0.407398	0.176	0.182	1
Rpl38	1.11e-26	-0.406042	0.786	0.814	2.5e-22
mt-Nd3	2.37e-05	-0.405785	0.43	0.455	0.535891
Mt2	0.835741	-0.405068	0.206	0.195	1
Tmsb4x	3.98e-28	-0.398279	0.974	0.961	9.01e-24
Lmna	0.000158205	-0.396877	0.299	0.32	1
Cdk2ap2	0.0382975	-0.395429	0.183	0.193	1
Ap1s1	0.054722	-0.39144	0.244	0.245	1
Agpat4	0.0123131	-0.39142	0.181	0.195	1
Cd2	8.38e-05	-0.38772	0.06	0.086	1
Il18	0.000877909	-0.38273	0.102	0.124	1
Lmo4	0.0118149	-0.378282	0.284	0.292	1
Selplg	0.0285122	-0.376395	0.24	0.244	1
Camk2d	0.0169507	-0.375655	0.192	0.205	1
Cyp51	5.33e-06	-0.373948	0.048	0.077	0.120566
mt-Atp6	1.96e-37	-0.372535	0.998	0.991	4.44e-33
Samhd1	3.39e-11	-0.372298	0.577	0.603	7.67e-07
mt-Nd4	1.94e-26	-0.370803	0.964	0.946	4.38e-22
Cmc2	0.575766	-0.368302	0.12	0.117	1
Pla2g15	0.203242	-0.368247	0.173	0.173	1
Psmb4	2.43e-06	-0.367864	0.478	0.493	0.0550853
Cdc42ep3	9.82e-05	-0.367824	0.08	0.108	1
Tspan14	0.331432	-0.364466	0.167	0.165	1
Arhgdia	2.73e-07	-0.363776	0.532	0.54	0.00617004
mt-Cytb	1.64e-22	-0.363766	0.977	0.959	3.71e-18
Dbnl	0.0429469	-0.362005	0.282	0.281	1
Ear1	1.16e-11	-0.36	0.014	0.047	2.61e-07
Spp1	2.08e-30	-0.358644	0.196	0.332	4.71e-26
Txnip	0.108827	-0.358579	0.246	0.247	1
mt-Nd5	0.000498963	-0.35766	0.537	0.533	1
Phlda3	0.000157984	-0.356701	0.074	0.101	1
Mfge8	0.00926255	-0.35585	0.181	0.2	1
Nr4a1	0.00293965	-0.355444	0.135	0.161	1
Chchd2	1.17e-09	-0.354109	0.71	0.709	2.65e-05
Mgat4b	0.137709	-0.353749	0.24	0.238	1
Ly9	0.346784	-0.352458	0.204	0.201	1
Atp5g3	0.00323259	-0.350347	0.416	0.412	1
Slc17a9	0.0200382	-0.35025	0.043	0.057	1
Cox5a	3.18e-13	-0.349937	0.599	0.628	7.19e-09
Fcgr4	0.00666096	-0.348199	0.341	0.346	1
Gnb2	0.00669874	-0.346709	0.483	0.468	1
Ap2s1	0.0191341	-0.346102	0.346	0.345	1
Ywhab	0.30694	-0.344428	0.36	0.334	1
Adcy3	0.000380559	-0.344141	0.055	0.077	1
Itgax	0.000949577	-0.342862	0.303	0.323	1
Qdpr	0.0178926	-0.341781	0.139	0.153	1
Cd36	2.25e-05	-0.341608	0.067	0.099	0.508055
Slc39a2	0.298621	-0.340554	0.138	0.138	1
Cidec	3.74e-11	-0.337963	0.015	0.048	8.46e-07
Tpm3	0.192776	-0.336152	0.361	0.344	1
Plin2	2.55e-12	-0.333342	0.627	0.645	5.77e-08
Rexo2	0.127524	-0.331972	0.328	0.318	1
Timm13	0.00522921	-0.331229	0.415	0.414	1
Anxa1	0.130691	-0.331135	0.204	0.204	1
S100a8	0.00194693	-0.33043	0.34	0.359	1
Cops9	0.000522189	-0.329872	0.468	0.465	1
Amz1	0.00506817	-0.329791	0.065	0.082	1
mt-Nd4l	0.00536065	-0.329777	0.478	0.464	1
Dhrs3	4.31e-08	-0.328507	0.056	0.096	0.000974902
Ccdc80	2.24e-09	-0.327252	0.032	0.069	5.06e-05
Cebpb	4e-14	-0.326997	0.804	0.812	9.05e-10
Psmb10	1.21e-09	-0.324427	0.594	0.62	2.74e-05
Dstn	0.0273785	-0.323463	0.37	0.364	1
Tbcb	0.506935	-0.321489	0.297	0.28	1
Net1	0.00174505	-0.320892	0.068	0.088	1
Glrx5	0.791184	-0.31994	0.187	0.178	1
Tmem14c	0.216565	-0.318386	0.366	0.347	1
Cotl1	0.0118021	-0.317555	0.442	0.427	1
Dazap2	0.00622235	-0.317119	0.468	0.457	1
Aplp2	0.252798	-0.31561	0.344	0.33	1
Rnase6	7.03e-06	-0.315432	0.046	0.075	0.159029
Sla	0.010446	-0.314793	0.15	0.167	1
Nceh1	0.587064	-0.313619	0.224	0.212	1
Gpx4	8.34e-07	-0.313202	0.674	0.671	0.0188716
Jpt1	0.10548	-0.312855	0.34	0.328	1
Csnk1g2	0.635152	-0.312368	0.113	0.111	1
Lars2	7.72e-18	-0.312366	0.881	0.881	1.75e-13
Trim29	0.226215	-0.312186	0.093	0.097	1
Atp6v0d1	0.168371	-0.310859	0.281	0.273	1
Pfn1	9.64e-09	-0.310805	0.685	0.689	0.000218087
Cib2	0.00448604	-0.310686	0.054	0.071	1
Gm16286	0.988325	-0.308181	0.259	0.239	1
Atpif1	0.0328846	-0.307518	0.428	0.413	1
Acaa1a	0.546166	-0.307407	0.267	0.253	1
Ppt2	0.483559	-0.305566	0.225	0.214	1
Gpx1	6.91e-10	-0.304698	0.635	0.651	1.56e-05
Cxcl3	0.0058622	-0.303165	0.049	0.067	1
Psme2	0.000626785	-0.301638	0.471	0.477	1
Tuba1b	0.0740065	-0.301601	0.354	0.347	1
Sh2d1b1	5.63e-09	-0.300212	0.019	0.049	0.000127353
Fgr	0.300269	-0.299276	0.148	0.149	1
Rpl7	6.9e-08	-0.298562	0.682	0.701	0.00156041
Hpcal1	0.69077	-0.297579	0.195	0.185	1
Alox5ap	0.240594	-0.296581	0.289	0.282	1
Ccnd3	0.650065	-0.296456	0.094	0.093	1
Gm20594	0.39116	-0.295284	0.261	0.233	1
Renbp	0.235006	-0.29456	0.245	0.241	1
Fam189a2	8.21e-06	-0.293653	0.026	0.05	0.185829
mt-Co1	4.02e-19	-0.293487	1	0.994	9.09e-15
Tsen34	0.672034	-0.29334	0.146	0.134	1
Ptms	0.010321	-0.293153	0.432	0.432	1
Snrnp70	0.310398	-0.293124	0.29	0.28	1
Sh3bgrl	0.57989	-0.292461	0.295	0.277	1
S100a1	0.380202	-0.291556	0.295	0.285	1
1600014C10Rik	0.705236	-0.291051	0.165	0.158	1
Blvra	0.930645	-0.290889	0.123	0.115	1
Psmd4	0.807227	-0.290583	0.298	0.27	1
Prcp	0.182848	-0.290569	0.349	0.333	1
Lipa	0.485541	-0.289825	0.278	0.265	1
Bak1	0.736819	-0.289181	0.238	0.225	1
Abhd17c	0.94627	-0.288084	0.09	0.086	1
Selenos	0.811886	-0.288066	0.286	0.265	1
Dgat1	0.0732935	-0.28801	0.108	0.119	1
Snrpd3	0.975659	-0.287917	0.152	0.143	1
Lsr	0.537575	-0.287566	0.111	0.111	1
Arpc2	0.0008922	-0.287466	0.5	0.498	1
Cct5	0.80997	-0.286355	0.182	0.171	1
Nup210	1.17e-06	-0.28511	0.026	0.053	0.0264206
Aifm2	0.751938	-0.284844	0.167	0.16	1
Mmp19	0.01386	-0.284333	0.159	0.177	1
Slc35c2	0.0249722	-0.283807	0.088	0.103	1
Hsp90b1	3.6e-07	-0.283299	0.678	0.67	0.00813514
Aldoc	0.860814	-0.283095	0.144	0.136	1
Ldlrap1	0.685269	-0.282928	0.157	0.153	1
Clec4n	4.11e-06	-0.28225	0.426	0.466	0.092932
Card11	7.34e-08	-0.280797	0.025	0.055	0.00165973
Bhlhe41	0.92874	-0.280727	0.239	0.221	1
Phgdh	0.00025187	-0.279651	0.036	0.056	1
Msmo1	0.00724894	-0.279316	0.071	0.089	1
Pld4	0.0102004	-0.278768	0.247	0.264	1
Capzb	0.00969176	-0.278608	0.514	0.5	1
2023-03-02	0.703998	-0.278353	0.189	0.172	1
B4galnt1	0.177391	-0.278306	0.159	0.165	1
Clec1b	0.944028	-0.278125	0.119	0.112	1
Rps6ka3	0.272993	-0.277626	0.088	0.093	1
Qsox1	0.0344752	-0.277528	0.091	0.104	1
Emc10	0.166601	-0.277044	0.27	0.233	1
Sulf2	0.0322198	-0.276994	0.069	0.082	1
Rpl37a	4.54e-25	-0.276709	0.909	0.924	1.03e-20
Pdia6	0.828147	-0.276654	0.416	0.372	1
Tnfaip2	3.91e-06	-0.276618	0.755	0.74	0.0885111
Lasp1	0.795645	-0.276005	0.37	0.338	1
Gpcpd1	0.00649677	-0.27556	0.102	0.123	1
Rbm8a	0.498426	-0.275244	0.218	0.21	1
Cox4i1	7.92e-11	-0.275238	0.719	0.73	1.79e-06
Fdft1	2.2e-05	-0.274883	0.038	0.063	0.498608
Slc29a1	0.230079	-0.274479	0.113	0.117	1
Bst2	7.5e-10	-0.2712	0.849	0.84	1.7e-05
Glrx3	0.863776	-0.270141	0.181	0.168	1
S100a13	0.994088	-0.269889	0.295	0.27	1
Ebpl	0.546162	-0.269865	0.137	0.134	1
Cd47	0.437311	-0.269184	0.379	0.354	1
Adrb2	0.299111	-0.268495	0.104	0.109	1
Canx	0.00288503	-0.265688	0.512	0.5	1
Fuom	0.274446	-0.264834	0.255	0.221	1
Fam122b	8.57e-06	-0.263948	0.032	0.057	0.193998
Psmd2	0.0781586	-0.263735	0.35	0.296	1
Pitpna	0.99846	-0.262962	0.328	0.297	1
Anxa4	0.502106	-0.2629	0.375	0.354	1
Camk1	0.316116	-0.261182	0.139	0.142	1
Pald1	0.0067611	-0.260569	0.054	0.071	1
Rps9	9.64e-16	-0.260388	0.817	0.832	2.18e-11
Pgls	0.638669	-0.26027	0.328	0.293	1
Ube2m	0.108496	-0.25918	0.216	0.183	1
Hnrnpc	0.38895	-0.258954	0.18	0.16	1
Fis1	0.313389	-0.258679	0.404	0.379	1
Tbca	0.0247403	-0.258294	0.431	0.43	1
Rtf2	0.776106	-0.257423	0.236	0.214	1
Pfdn2	0.115695	-0.257227	0.239	0.203	1
Ndufa3	0.28585	-0.256846	0.347	0.301	1
Gnb1	0.356314	-0.25592	0.392	0.371	1
Wdr89	0.43649	-0.255913	0.072	0.075	1
Slc12a7	0.149042	-0.255644	0.067	0.074	1
Mical1	0.953349	-0.255333	0.09	0.086	1
B3gnt7	0.00136261	-0.25308	0.041	0.06	1
Taf15	0.468292	-0.252453	0.108	0.111	1
Tnfrsf1b	0.938486	-0.252386	0.445	0.408	1
Ndufb7	0.0449948	-0.25228	0.486	0.468	1
Apbb1ip	0.0404755	-0.252208	0.155	0.168	1
Aamp	0.498799	-0.25178	0.319	0.283	1
Prr13	0.115494	-0.251489	0.428	0.413	1
Cmpk1	0.430332	-0.250929	0.25	0.221	1
Cyth4	0.154796	-0.250592	0.278	0.275	1
Gpr137b	0.370859	-0.250264	0.228	0.2	1
Commd7	0.663358	-0.24998	0.149	0.145	1
Kynu	0.73972	-0.249895	0.197	0.18	1
Atg101	0.911598	-0.249139	0.125	0.12	1
Rack1	1.06e-05	-0.249086	0.617	0.624	0.240754
Zmat2	0.526893	-0.248827	0.218	0.196	1
Ddx56	0.722698	-0.248804	0.058	0.058	1
Tmem120a	0.753108	-0.248607	0.1	0.094	1
Bnip2	0.664356	-0.247345	0.217	0.198	1
Rplp2	1.93e-11	-0.247262	0.775	0.785	4.37e-07
Haus8	0.0980205	-0.247091	0.074	0.085	1
Sqstm1	0.824365	-0.246771	0.361	0.328	1
Olr1	0.0345774	-0.246371	0.239	0.253	1
Myadm	0.159192	-0.246074	0.075	0.083	1
Hcls1	0.144927	-0.245981	0.493	0.462	1
Il10ra	0.835051	-0.245202	0.214	0.204	1
Sf1	0.281884	-0.244722	0.18	0.16	1
Trnau1ap	0.209882	-0.244593	0.127	0.109	1
Clmn	0.168266	-0.243921	0.045	0.052	1
Leprotl1	0.50565	-0.243203	0.225	0.202	1
Pex11a	0.196386	-0.243006	0.071	0.078	1
Psmc5	0.0725971	-0.241897	0.214	0.179	1
Eif5a	0.0999748	-0.2418	0.442	0.426	1
Lap3	0.170811	-0.241545	0.238	0.205	1
Dhx15	0.0693366	-0.240902	0.144	0.12	1
Idi1	1.04e-07	-0.240091	0.021	0.048	0.00235903
Pon2	0.754167	-0.239889	0.205	0.188	1
Lcp1	0.00187585	-0.239503	0.642	0.623	1
Txn2	0.154111	-0.239344	0.147	0.125	1
Ptpn6	0.558199	-0.239198	0.413	0.384	1
Mtss1	0.135597	-0.238888	0.16	0.136	1
Sgsm2	0.999776	-0.238609	0.058	0.056	1
Tmcc3	0.773959	-0.238155	0.109	0.102	1
Rab29	0.00877861	-0.238016	0.024	0.037	1
Cct6a	0.402626	-0.237395	0.188	0.167	1
Romo1	0.913539	-0.236559	0.372	0.338	1
Ptma	0.0259586	-0.23652	0.811	0.763	1
Atp6v1g1	0.0594813	-0.236184	0.503	0.49	1
Trem1	0.0170731	-0.23618	0.049	0.064	1
Pparg	2.73e-05	-0.235867	0.029	0.052	0.617905
Sort1	0.968465	-0.235328	0.137	0.128	1
Tmem268	0.977753	-0.235036	0.113	0.107	1
U2af1	0.0370104	-0.234645	0.147	0.12	1
Atxn10	0.354306	-0.234581	0.164	0.143	1
Pqbp1	0.949894	-0.234021	0.058	0.056	1
Gpat4	0.693774	-0.233767	0.1	0.099	1
Sec61a1	0.00823797	-0.233693	0.274	0.222	1
Nucks1	0.186541	-0.232768	0.272	0.236	1
Borcs6	0.0269576	-0.232533	0.053	0.067	1
Cuta	0.490062	-0.232178	0.205	0.183	1
Sirpa	1.1e-05	-0.231692	0.742	0.729	0.249996
Stub1	0.0200487	-0.231664	0.199	0.161	1
Wdr1	0.129042	-0.231273	0.283	0.243	1
Tbxas1	0.41487	-0.230935	0.136	0.136	1
Hmgb1	0.230429	-0.230857	0.142	0.124	1
Ctsd	1.93e-09	-0.229706	0.881	0.884	4.38e-05
P2rx5	0.148874	-0.227749	0.046	0.053	1
Mrpl14	0.237499	-0.227747	0.209	0.182	1
Neu1	0.992455	-0.227714	0.373	0.342	1
Lamtor4	0.259947	-0.227625	0.446	0.42	1
Emc1	0.0862144	-0.226847	0.205	0.173	1
Clec4a2	0.0662352	-0.226643	0.043	0.053	1
Ncf2	0.37536	-0.226455	0.36	0.344	1
Serpine1	0.00458605	-0.226181	0.08	0.101	1
Psma7	0.602591	-0.225725	0.428	0.401	1
Trim25	0.667919	-0.22551	0.226	0.219	1
Tex261	0.538186	-0.224993	0.228	0.206	1
Arhgef6	0.0116773	-0.224773	0.052	0.068	1
Slfn2	4.32e-06	-0.223972	0.628	0.636	0.0978167
Aph1a	0.233941	-0.223529	0.224	0.195	1
Nap1l1	0.167463	-0.223478	0.248	0.214	1
Eif3b	0.0365483	-0.223047	0.273	0.227	1
Rassf3	0.4165	-0.222563	0.165	0.166	1
Ctsc	2.52e-06	-0.222063	0.679	0.694	0.0571205
Sfxn3	0.27085	-0.221787	0.093	0.081	1
Cracr2b	0.88408	-0.221472	0.065	0.061	1
Tagln2	0.0276134	-0.221178	0.52	0.505	1
Nxf1	0.430339	-0.221139	0.14	0.127	1
Uap1l1	0.218167	-0.220003	0.187	0.163	1
Bcar3	0.00886791	-0.219232	0.021	0.032	1
Prdx2	0.114417	-0.218953	0.297	0.253	1
Mrpl2	0.95993	-0.218562	0.07	0.068	1
Nudt16l1	0.138417	-0.217833	0.061	0.07	1
Ogfr	0.790421	-0.217798	0.268	0.247	1
Krt19	2.19e-11	-0.217666	0.003	0.027	4.96e-07
Tuba1c	0.421462	-0.217545	0.145	0.148	1
Atp6v1e1	0.102539	-0.215743	0.512	0.496	1
Mvb12a	0.0438928	-0.215176	0.186	0.154	1
Lpin1	0.0723826	-0.214711	0.043	0.053	1
Flot2	0.0801286	-0.214405	0.139	0.115	1
mt-Co3	1.06e-18	-0.214342	1	0.993	2.39e-14
Trappc2l	0.33564	-0.213979	0.304	0.266	1
Cdc42ep2	0.433551	-0.213909	0.113	0.101	1
Gmpr	0.00955679	-0.213394	0.022	0.034	1
Supt16	0.703956	-0.213376	0.136	0.127	1
Ppp4c	0.644077	-0.213301	0.177	0.174	1
Snx17	0.0339325	-0.212908	0.161	0.131	1
Myl12b	0.850557	-0.212406	0.155	0.145	1
Tmem138	0.0751428	-0.212199	0.035	0.044	1
Itm2c	0.240756	-0.211836	0.524	0.495	1
Chpf	0.871441	-0.21161	0.068	0.065	1
Nr2c2ap	0.294657	-0.211582	0.093	0.081	1
Mrps12	0.431215	-0.210867	0.139	0.125	1
Psma6	0.172439	-0.210778	0.236	0.204	1
Dnajb6	0.255831	-0.210321	0.285	0.25	1
Cdipt	0.327986	-0.210236	0.218	0.194	1
Cd200r1	0.620892	-0.210208	0.092	0.084	1
Slc25a39	0.504236	-0.209955	0.133	0.121	1
Mpdu1	0.0296161	-0.209897	0.147	0.119	1
Cdk11b	0.903491	-0.209777	0.198	0.189	1
Ywhah	0.0941161	-0.209211	0.325	0.278	1
Ptpn12	0.214143	-0.208818	0.176	0.153	1
Chmp2a	0.507597	-0.208316	0.304	0.27	1
Snrpd1	0.296142	-0.208312	0.234	0.206	1
Idh1	0.969719	-0.207479	0.106	0.101	1
Rit1	0.192669	-0.207292	0.167	0.143	1
Rac1	0.227263	-0.207268	0.34	0.293	1
Vasp	0.867178	-0.207167	0.341	0.312	1
Med28	0.605505	-0.206993	0.192	0.177	1
Sec31a	0.107929	-0.206977	0.13	0.109	1
Pmp22	0.0569009	-0.206908	0.165	0.136	1
Manf	0.256212	-0.206384	0.281	0.247	1
Ndufa8	0.00954682	-0.206197	0.236	0.191	1
Siglece	0.000140007	-0.205964	0.017	0.034	1
Smap2	0.468467	-0.205419	0.119	0.107	1
Tmem50a	0.781824	-0.204788	0.474	0.429	1
Snf8	0.0714998	-0.204557	0.248	0.209	1
Alyref	0.0695242	-0.204107	0.087	0.07	1
Parl	0.0657263	-0.203664	0.129	0.107	1
Capn1	0.103971	-0.203551	0.239	0.204	1
Ehd4	0.393442	-0.203445	0.099	0.088	1
Arhgap9	0.979519	-0.203007	0.111	0.107	1
Coro1a	0.687219	-0.203002	0.297	0.274	1
Lilra5	0.176158	-0.202247	0.121	0.101	1
Ccdc88a	0.75102	-0.202147	0.25	0.239	1
Sdhc	0.551958	-0.202085	0.202	0.183	1
Shtn1	0.239811	-0.202014	0.171	0.148	1
Tppp3	0.0770277	-0.201611	0.078	0.09	1
Oaz1	0.00209398	-0.201558	0.591	0.586	1
Tbc1d10a	0.384178	-0.201556	0.105	0.094	1
Hcfc1r1	0.325365	-0.201502	0.222	0.195	1
Tmem238	0.492978	-0.201282	0.057	0.06	1
Cdc42se1	0.153454	-0.200886	0.152	0.13	1
Cdc42	0.0871233	-0.200841	0.54	0.514	1
Sem1	0.00168528	-0.200641	0.634	0.616	1
Cyb5b	0.319401	-0.200406	0.167	0.147	1
Chmp4b	0.0503032	-0.200299	0.352	0.299	1
Ppp6c	0.116779	-0.200214	0.102	0.086	1
Rpl8	0.000284359	-0.199702	0.687	0.678	1
Hist1h1c	0.229358	-0.199302	0.171	0.149	1
Psme2b	0.914665	-0.199194	0.115	0.11	1
Grk2	0.831651	-0.198655	0.31	0.291	1
Gltp	0.0153039	-0.197916	0.297	0.244	1
Stk40	0.443828	-0.19776	0.074	0.078	1
Srebf2	0.739141	-0.197579	0.07	0.066	1
Rsl1d1	0.0718147	-0.197249	0.089	0.072	1
Tmem208	0.0172696	-0.196634	0.208	0.168	1
Wdr83os	0.232149	-0.19648	0.251	0.218	1
Fam192a	0.0658537	-0.19595	0.124	0.102	1
Rpl41	2.72e-13	-0.195617	0.93	0.936	6.17e-09
Gm17018	0.0511911	-0.195536	0.115	0.093	1
Kat6b	0.449987	-0.194897	0.026	0.029	1
Aen	0.258554	-0.194635	0.054	0.06	1
Ppp1r18	0.87025	-0.193731	0.128	0.125	1
Pet100	0.401283	-0.193421	0.203	0.184	1
Osgep	0.5584	-0.192873	0.138	0.126	1
Rpia	0.22808	-0.192836	0.048	0.055	1
Nrip1	0.381149	-0.192643	0.142	0.127	1
Cd82	0.0511527	-0.192264	0.298	0.251	1
Tmem256	0.805522	-0.191558	0.416	0.377	1
Hdgf	0.0726951	-0.191391	0.298	0.254	1
mt-Atp8	0.36414	-0.191258	0.214	0.194	1
Rex1bd	0.233398	-0.190812	0.281	0.246	1
Kcnip4	6.78e-06	-0.190473	0.004	0.018	0.153382
Tfec	0.929647	-0.190308	0.072	0.07	1
Mapk1	0.0635776	-0.190247	0.154	0.128	1
Rps14	9.89e-05	-0.190214	0.759	0.755	1
Ftl1-ps1	0.145037	-0.190204	0.263	0.227	1
Ddx39b	0.228059	-0.190191	0.258	0.227	1
Sp110	0.0166202	-0.190148	0.166	0.133	1
Spcs1	0.164454	-0.189816	0.259	0.223	1
Mt1	0.0300126	-0.189731	0.478	0.487	1
Arpc3	0.566058	-0.189546	0.529	0.491	1
Actn4	0.00665598	-0.189192	0.218	0.174	1
Agpat3	0.580459	-0.188924	0.048	0.05	1
Cfl1	0.648294	-0.188897	0.506	0.451	1
Smad2	0.571755	-0.188646	0.058	0.053	1
Actg1	2.4e-05	-0.188505	0.77	0.763	0.542222
Lrp12	0.0745827	-0.187849	0.168	0.141	1
Tmem109	0.203176	-0.187374	0.13	0.113	1
Eif5b	0.459928	-0.186867	0.32	0.288	1
Hint1	0.487716	-0.186477	0.44	0.418	1
Plekhg1	0.475708	-0.186387	0.089	0.081	1
Sec61b	0.872151	-0.186306	0.366	0.334	1
Psmb3	0.676821	-0.186281	0.378	0.344	1
Pex16	0.841232	-0.186145	0.157	0.15	1
Pdlim5	0.120141	-0.186094	0.097	0.081	1
Sh3bgrl2	0.619691	-0.185974	0.065	0.059	1
Strn3	0.227123	-0.185912	0.139	0.123	1
4931406C07Rik	0.41713	-0.185513	0.051	0.055	1
Hmgcs1	0.953737	-0.185354	0.094	0.091	1
Dab2	0.497736	-0.185176	0.131	0.131	1
Rbm3	0.187131	-0.184995	0.372	0.328	1
Fdps	0.32012	-0.184924	0.048	0.053	1
Sirpb1c	0.252609	-0.184718	0.168	0.146	1
Slc39a7	0.0522487	-0.184578	0.225	0.189	1
Cox6b1	0.116481	-0.184039	0.546	0.528	1
Creg1	0.00260632	-0.184016	0.647	0.653	1
Anp32b	0.00868322	-0.183722	0.365	0.301	1
Ndufa4	0.211887	-0.183582	0.12	0.104	1
Cdk5rap3	0.0387414	-0.182975	0.093	0.074	1
Tns1	0.0424172	-0.182138	0.035	0.046	1
2023-09-11	0.834436	-0.18175	0.073	0.073	1
Capza2	0.667166	-0.181584	0.421	0.387	1
4930523C07Rik	0.402501	-0.181516	0.066	0.07	1
Bud31	0.0146821	-0.181299	0.167	0.134	1
Nus1	0.102121	-0.181284	0.273	0.231	1
Nsun2	0.0555715	-0.181211	0.08	0.064	1
Bub3	0.0666487	-0.181153	0.139	0.115	1
Nfix	0.179716	-0.180927	0.111	0.096	1
Rps6	0.531488	-0.180759	0.556	0.518	1
Ptpa	0.636413	-0.180739	0.143	0.132	1
Kdelr1	0.00544527	-0.180475	0.239	0.19	1
Cdk6	0.943615	-0.180395	0.083	0.08	1
Orai1	0.212001	-0.180345	0.147	0.129	1
Mcts1	0.118214	-0.180104	0.127	0.107	1
Acbd5	0.369829	-0.180092	0.079	0.069	1
Btf3	0.496147	-0.179981	0.484	0.434	1
Stxbp2	0.108413	-0.179189	0.225	0.192	1
Ivns1abp	0.143343	-0.178976	0.077	0.086	1
Igf2bp2	0.783887	-0.178095	0.063	0.062	1
Ppp1r35	0.649867	-0.178092	0.071	0.065	1
Ucp2	0.770798	-0.177347	0.435	0.405	1
Rab8a	0.0619456	-0.177273	0.197	0.164	1
Rara	0.214541	-0.17714	0.029	0.035	1
Mical2	0.103781	-0.176943	0.028	0.035	1
Nsfl1c	0.243635	-0.176717	0.101	0.088	1
Vti1b	0.00469074	-0.175956	0.181	0.142	1
Pdia3	0.784743	-0.175589	0.487	0.444	1
Gab2	0.479022	-0.175504	0.118	0.107	1
Sf3b6	0.0078719	-0.175466	0.224	0.181	1
Scp2	0.043402	-0.175348	0.25	0.209	1
Ccny	0.00797436	-0.175094	0.141	0.11	1
Slc9a4	0.545725	-0.174266	0.058	0.052	1
Lgals9	0.501315	-0.174248	0.082	0.074	1
Dcaf15	0.788103	-0.173832	0.036	0.034	1
Cd200	0.0116582	-0.173583	0.135	0.107	1
Bckdk	0.719929	-0.17336	0.084	0.078	1
Ndufa5	0.32316	-0.172921	0.325	0.287	1
Pmf1	0.269439	-0.172883	0.065	0.055	1
Arrdc1	0.815203	-0.172006	0.103	0.098	1
Snrpb	0.0383936	-0.171801	0.317	0.269	1
Coro1c	0.042477	-0.171737	0.198	0.165	1
Atp1a1	0.0623263	-0.171639	0.351	0.297	1
Pygo2	0.916834	-0.171489	0.088	0.085	1
Cdkn2a	0.705497	-0.171475	0.056	0.057	1
Atp5mpl	0.131344	-0.17009	0.381	0.331	1
Slc25a1	0.0377081	-0.170071	0.123	0.1	1
5031439G07Rik	0.287186	-0.170063	0.157	0.139	1
Zcchc17	0.859146	-0.16962	0.072	0.069	1
Vhl	0.151966	-0.168949	0.108	0.092	1
Mrpl12	0.0116906	-0.168789	0.183	0.147	1
Cyp4f16	0.533006	-0.168377	0.079	0.071	1
Llph	0.0773797	-0.168232	0.278	0.236	1
Tmed3	0.0557492	-0.167752	0.269	0.226	1
Cisd1	0.00561345	-0.167488	0.202	0.158	1
Rps15	0.000181128	-0.167027	0.757	0.746	1
R3hdm4	0.422764	-0.166953	0.111	0.1	1
Cdc26	0.124986	-0.166818	0.099	0.083	1
Hint2	0.122378	-0.166709	0.145	0.123	1
Hip1	0.0330137	-0.166441	0.048	0.06	1
Mcoln3	0.481516	-0.166351	0.044	0.047	1
Frmd4a	0.646109	-0.166136	0.07	0.071	1
Dap	0.132217	-0.165966	0.184	0.156	1
Sumo3	0.023686	-0.165649	0.223	0.184	1
Ap2a2	0.0497741	-0.165483	0.107	0.087	1
Plekhm1	0.0155552	-0.165335	0.125	0.099	1
Ndufa2	0.260625	-0.165304	0.558	0.531	1
Diaph1	0.159302	-0.165275	0.335	0.293	1
Scamp2	0.0770966	-0.164784	0.193	0.163	1
Trappc4	0.132565	-0.164536	0.195	0.166	1
Ppp1ca	0.0901399	-0.16398	0.296	0.253	1
Mrto4	0.578705	-0.163908	0.079	0.073	1
Mgst3	0.756389	-0.163833	0.054	0.051	1
Sftpc	0.029482	-0.163685	0.032	0.043	1
Dnajc2	0.0550396	-0.163674	0.133	0.109	1
Lsm4	0.193385	-0.16363	0.266	0.232	1
Phc2	0.192713	-0.16344	0.164	0.143	1
Spns1	0.540471	-0.163369	0.104	0.105	1
Rras2	0.0142473	-0.162897	0.021	0.032	1
Abcd2	0.82311	-0.162788	0.06	0.056	1
Polr2i	0.0104756	-0.162435	0.168	0.133	1
Angptl4	0.482943	-0.162337	0.036	0.038	1
Csnk1e	0.193156	-0.162261	0.084	0.072	1
Lonrf1	0.451117	-0.162251	0.03	0.033	1
Mfsd5	0.281129	-0.162028	0.149	0.132	1
Zranb3	0.434368	-0.16195	0.068	0.061	1
Atp5o.1	0.0150863	-0.161887	0.254	0.208	1
D17H6S53E	0.671234	-0.161857	0.041	0.038	1
Rock2	0.0352565	-0.161769	0.136	0.111	1
Cct8	0.0288142	-0.161604	0.244	0.202	1
Lsm5	0.162167	-0.161462	0.078	0.065	1
Uxs1	0.453644	-0.161391	0.041	0.045	1
Tmem134	0.0229982	-0.161372	0.218	0.18	1
Plscr1	0.00456811	-0.161114	0.086	0.062	1
Otulin	0.0784579	-0.161031	0.084	0.068	1
H13	0.00610606	-0.161012	0.244	0.196	1
Smarcd2	0.104917	-0.160648	0.119	0.1	1
Ndufa11	0.0366659	-0.160491	0.247	0.206	1
Tfeb	0.542827	-0.160477	0.076	0.078	1
Sgta	0.18091	-0.160208	0.145	0.125	1
Ffar2	2.49e-07	-0.160166	0.006	0.024	0.00564166
Pip4p1	0.00955114	-0.160079	0.117	0.09	1
Cish	0.836225	-0.159988	0.064	0.061	1
Zkscan6	0.0860799	-0.159923	0.027	0.035	1
Ehbp1l1	0.0199039	-0.159726	0.228	0.188	1
Hgs	0.0183975	-0.159653	0.129	0.102	1
Crybg1	0.378813	-0.159587	0.072	0.063	1
Tuba4a	0.0970348	-0.159515	0.169	0.144	1
Klra2	0.661436	-0.1595	0.176	0.164	1
Apoc1	0.291517	-0.159049	0.019	0.023	1
Tars	0.76719	-0.159034	0.061	0.057	1
Rps10	0.015573	-0.159001	0.33	0.275	1
Pld3	0.242405	-0.15881	0.518	0.504	1
Ids	0.00754736	-0.158793	0.09	0.067	1
Cndp2	0.40192	-0.158476	0.412	0.364	1
Rab3d	0.634081	-0.158411	0.109	0.101	1
Siglecf	0.668783	-0.158354	0.045	0.046	1
Bola2	0.335185	-0.158013	0.417	0.368	1
Acaa2	0.657415	-0.157298	0.08	0.074	1
Fbxw11	0.0210195	-0.157193	0.091	0.07	1
Trub2	0.501494	-0.157059	0.058	0.053	1
Psmb9	0.658316	-0.157018	0.454	0.412	1
Trim12c	0.169057	-0.156961	0.086	0.073	1
Akr7a5	0.0944009	-0.156173	0.063	0.05	1
Fbl	0.0718276	-0.15614	0.149	0.125	1
Mrpl13	0.0474	-0.15602	0.169	0.14	1
Bzw1	0.0388255	-0.156001	0.205	0.169	1
Pnpla8	0.0483511	-0.155655	0.134	0.109	1
Ppie	0.692094	-0.155587	0.061	0.062	1
Llgl1	0.964258	-0.155407	0.04	0.04	1
Cdc34	0.0480126	-0.15536	0.114	0.093	1
Rps26	0.0988625	-0.155133	0.651	0.628	1
Ifi35	0.141596	-0.155087	0.132	0.113	1
Ebp	0.0507303	-0.155024	0.116	0.094	1
Tmem229b	0.426758	-0.154992	0.064	0.057	1
Mrpl33	0.0285671	-0.154939	0.293	0.246	1
Pqlc3	0.0829877	-0.15485	0.105	0.087	1
Ndufv2	0.0290629	-0.154787	0.152	0.123	1
Otub1	0.0598929	-0.154422	0.122	0.1	1
Tbc1d22a	0.126931	-0.154314	0.073	0.06	1
Ifi211	7.8e-06	-0.154275	0.148	0.1	0.176545
Laptm4b	0.828828	-0.154016	0.046	0.043	1
Timm10b	0.00737319	-0.15392	0.184	0.146	1
Cox17	0.487159	-0.153751	0.334	0.303	1
Pygl	0.0196529	-0.153679	0.185	0.151	1
Mbnl1	0.0617419	-0.153508	0.286	0.245	1
Plekha2	0.0027336	-0.153245	0.169	0.131	1
Kmt5a	0.000734903	-0.153173	0.266	0.208	1
Hadha	0.350368	-0.153092	0.096	0.085	1
Irf2bp2	0.0698691	-0.153072	0.304	0.261	1
Ubtf	0.125089	-0.152977	0.15	0.129	1
Cox14	0.0285094	-0.15295	0.202	0.167	1
St7	0.512309	-0.152911	0.059	0.053	1
Rnf13	0.0199556	-0.152909	0.144	0.115	1
Selenop	0.0531679	-0.152451	0.132	0.109	1
Mydgf	0.00267243	-0.152439	0.254	0.203	1
Rpn1	0.695099	-0.152292	0.407	0.371	1
Mag	0.71513	-0.152202	0.089	0.083	1
Exosc4	0.000388244	-0.151916	0.126	0.09	1
Cs	0.392583	-0.151602	0.119	0.107	1
Dnajb13	0.0996	-0.151047	0.024	0.031	1
Ncbp3	0.544729	-0.150787	0.043	0.039	1
Vopp1	0.245589	-0.150641	0.075	0.064	1
Tmem219	0.0127976	-0.150403	0.2	0.162	1
Ngdn	0.284689	-0.150025	0.116	0.102	1
Shisa5	0.634243	-0.149877	0.478	0.43	1
Hdac4	0.38782	-0.149846	0.09	0.08	1
Zfp524	0.256718	-0.149839	0.043	0.048	1
Tbrg1	0.0190317	-0.149532	0.103	0.079	1
E2f1	0.0484072	-0.149462	0.118	0.097	1
Kctd3	0.519639	-0.149371	0.021	0.023	1
Plcb2	0.144254	-0.149142	0.106	0.09	1
Sarnp	0.0275416	-0.148999	0.183	0.15	1
Mrps15	0.195461	-0.148745	0.138	0.119	1
Med30	0.0668778	-0.148566	0.05	0.038	1
Flna	0.0115746	-0.148294	0.223	0.181	1
Naa50	0.0048599	-0.148248	0.163	0.127	1
Siglec1	0.853161	-0.148213	0.037	0.037	1
Srrt	0.438081	-0.148074	0.087	0.079	1
Otulinl	0.719467	-0.148039	0.065	0.06	1
Baz1a	0.212352	-0.147992	0.218	0.192	1
Zfand6	0.0163461	-0.147871	0.158	0.128	1
Eif3l	0.137456	-0.147854	0.136	0.116	1
Pim1	0.0300868	-0.147824	0.635	0.612	1
Atf4	0.207482	-0.147565	0.416	0.371	1
Tnpo2	0.968142	-0.147377	0.03	0.029	1
Adap1	0.104814	-0.147357	0.176	0.151	1
Lamtor2	0.336963	-0.147145	0.367	0.329	1
Wwtr1	0.316886	-0.147091	0.053	0.046	1
Usf2	0.208111	-0.147071	0.335	0.296	1
Myo6	0.107303	-0.146898	0.067	0.054	1
Il3ra	5e-05	-0.14689	0.277	0.211	1
Insig1	0.759853	-0.146642	0.063	0.063	1
Vrk1	0.0424869	-0.146108	0.025	0.034	1
Yeats4	0.0788194	-0.146024	0.169	0.142	1
Mob3c	0.211126	-0.145987	0.037	0.044	1
Tjp2	0.529268	-0.145876	0.042	0.045	1
Ddrgk1	0.117488	-0.14587	0.27	0.233	1
Spop	0.0362226	-0.145858	0.351	0.297	1
Mpv17l2	0.120315	-0.145611	0.086	0.071	1
Tmem63b	0.100873	-0.145594	0.1	0.083	1
Anp32a	0.0693656	-0.145265	0.193	0.164	1
Fuca1	0.454239	-0.145153	0.271	0.244	1
Tor1aip2	0.661669	-0.145059	0.112	0.104	1
Pmvk	0.970574	-0.144934	0.067	0.065	1
Tmem97	0.754888	-0.144504	0.075	0.071	1
Tmem106a	0.191213	-0.144273	0.289	0.252	1
Pih1d1	0.296087	-0.144255	0.104	0.092	1
Snrpb2	0.0741363	-0.144201	0.147	0.124	1
Nabp1	0.0895542	-0.144078	0.137	0.15	1
Ndufs6	0.00774074	-0.143909	0.36	0.296	1
Atp5g1	0.0497813	-0.143699	0.297	0.253	1
Irf9	0.843124	-0.143693	0.079	0.075	1
Scamp1	0.0277831	-0.143464	0.114	0.091	1
Nucb2	0.018654	-0.143051	0.115	0.09	1
Ndufb8	0.0661252	-0.142669	0.299	0.255	1
Hvcn1	0.600046	-0.142498	0.436	0.403	1
Ffar4	0.510377	-0.142449	0.029	0.032	1
Ttc33	0.222642	-0.142061	0.065	0.055	1
Rae1	0.647273	-0.141952	0.05	0.046	1
Nfkbil1	0.185555	-0.141898	0.085	0.072	1
Snx1	0.0525507	-0.141791	0.123	0.101	1
Sae1	0.140141	-0.141659	0.074	0.062	1
Prkar2b	0.990217	-0.141533	0.063	0.061	1
Uhmk1	0.00402113	-0.14142	0.172	0.133	1
Csnk2a1	0.0183397	-0.140959	0.19	0.155	1
Ccdc22	0.814291	-0.140807	0.058	0.055	1
Pcmt1	0.0538884	-0.140785	0.116	0.095	1
Cytip	0.0162281	-0.140554	0.021	0.032	1
Zfp706	0.000244377	-0.140346	0.163	0.119	1
Ppp4r3b	0.00801296	-0.140031	0.117	0.09	1
Bhlhe40	0.23525	-0.140025	0.385	0.342	1
Smarcc1	0.079789	-0.139962	0.092	0.076	1
Sod1	0.00166769	-0.139961	0.261	0.206	1
Rnf4	0.0332441	-0.13958	0.092	0.073	1
Ndufaf8	0.00548396	-0.139525	0.196	0.156	1
Prkcd	0.29582	-0.139259	0.442	0.396	1
Plekhb2	0.0110812	-0.139209	0.25	0.204	1
Dpysl2	0.69657	-0.139193	0.092	0.086	1
Wdr77	0.112375	-0.13915	0.024	0.031	1
Fyn	0.121936	-0.138846	0.046	0.037	1
Ndufs2	0.0883376	-0.138733	0.246	0.21	1
Arf2	0.127082	-0.138576	0.073	0.061	1
Nt5c	0.00895488	-0.138323	0.173	0.137	1
Atp6v1h	0.00297019	-0.138311	0.141	0.108	1
Smim7	0.0167114	-0.138226	0.106	0.083	1
Rpl35a	0.000956327	-0.138079	0.781	0.774	1
Ebna1bp2	0.000381356	-0.138038	0.089	0.061	1
Bzw2	0.686205	-0.137847	0.024	0.026	1
Clpp	0.194507	-0.137797	0.089	0.076	1
Lman2l	0.927194	-0.137767	0.054	0.052	1
Ube2s	0.000243835	-0.137746	0.307	0.239	1
Ttc1	0.335947	-0.137743	0.071	0.062	1
Serp1	0.011542	-0.137693	0.266	0.217	1
Pex6	0.0099192	-0.137564	0.127	0.099	1
Ttyh2	0.539632	-0.137161	0.074	0.076	1
Hspa9	0.019285	-0.137036	0.313	0.26	1
Tifab	0.602636	-0.136817	0.044	0.046	1
Coa5	0.0116368	-0.136694	0.298	0.245	1
Ccndbp1	0.716081	-0.136618	0.091	0.086	1
Enoph1	0.498515	-0.136494	0.037	0.033	1
Adprhl2	0.229926	-0.13647	0.065	0.056	1
Timm50	0.947928	-0.136429	0.052	0.051	1
Ndufb5	0.0916314	-0.136303	0.361	0.311	1
Aurkaip1	0.00163062	-0.13615	0.241	0.189	1
Ran	0.149799	-0.136145	0.341	0.3	1
Mrpl48	0.638389	-0.136125	0.075	0.069	1
Sptlc1	0.0313114	-0.135891	0.103	0.081	1
Ndufs8	0.746536	-0.135834	0.059	0.06	1
Api5	0.158138	-0.135782	0.102	0.088	1
Utp6	0.550128	-0.135689	0.052	0.047	1
Fbxw17	0.0171737	-0.135602	0.065	0.048	1
mt-Co2	1.22e-06	-0.135545	0.998	0.99	0.0276177
Ddi2	0.0229313	-0.135432	0.149	0.12	1
Pik3cd	0.2534	-0.135359	0.139	0.123	1
Iqgap1	0.694986	-0.135281	0.587	0.542	1
Vwa5a	0.0187525	-0.135162	0.149	0.12	1
Blmh	0.00221578	-0.134964	0.146	0.112	1
Polr2h	0.773039	-0.134596	0.052	0.053	1
Hnrnpm	0.0909774	-0.134585	0.309	0.264	1
Ddx23	0.890933	-0.134387	0.036	0.035	1
Tomm34	0.037589	-0.134343	0.165	0.136	1
Cox6a1	0.0734762	-0.134196	0.473	0.41	1
Cks1b	0.960469	-0.134191	0.032	0.032	1
Magohb	0.768768	-0.133984	0.077	0.073	1
Cpt2	0.398919	-0.133584	0.036	0.04	1
Acot8	0.3322	-0.133559	0.064	0.056	1
Rxra	0.198708	-0.133456	0.104	0.09	1
Cog8	0.246043	-0.133265	0.075	0.065	1
C1d	4.66e-05	-0.133116	0.128	0.088	1
Snx3	0.0345296	-0.132926	0.219	0.183	1
Fbxo7	0.998134	-0.132873	0.062	0.061	1
Fpr1	0.00128838	-0.132727	0.029	0.046	1
Purb	0.0211276	-0.132667	0.203	0.167	1
Ptov1	0.058337	-0.132404	0.092	0.074	1
Serf2	0.0127535	-0.132076	0.681	0.65	1
Enpp1	0.436321	-0.132062	0.029	0.033	1
Eef1b2	0.531372	-0.131964	0.542	0.518	1
Dusp5	0.23373	-0.131831	0.102	0.113	1
Dck	0.321137	-0.131749	0.056	0.061	1
Evl	0.0940699	-0.131704	0.232	0.199	1
Rin3	0.801557	-0.131552	0.045	0.043	1
Emc2	0.609896	-0.131504	0.081	0.075	1
2023-03-02	0.0776249	-0.131378	0.122	0.102	1
Prkar1a	9.33e-05	-0.131294	0.248	0.188	1
Man2a2	0.00153817	-0.131254	0.018	0.032	1
Vapa	0.0201487	-0.131146	0.245	0.203	1
Herpud1	0.122972	-0.131087	0.093	0.078	1
Xbp1	0.142893	-0.131021	0.207	0.181	1
Tob1	0.100425	-0.130906	0.069	0.08	1
Bcap31	0.000731974	-0.130887	0.256	0.198	1
Drg2	0.264911	-0.130754	0.038	0.032	1
Aar2	0.116149	-0.130719	0.074	0.061	1
Pros1	0.200909	-0.130461	0.063	0.053	1
Psme1	0.635947	-0.130328	0.506	0.47	1
Pttg1	0.261582	-0.130315	0.116	0.102	1
Trpv2	0.0245397	-0.130289	0.186	0.153	1
Perp	0.000270409	-0.130238	0.009	0.022	1
Areg	0.12673	-0.130101	0.011	0.016	1
Snrpd2	0.0361107	-0.130056	0.219	0.183	1
Ywhae	0.00886893	-0.130024	0.37	0.307	1
Bcl2l1	0.15294	-0.12978	0.196	0.171	1
Sh3bp5	0.00401212	-0.129737	0.015	0.027	1
Atp5f1	0.0221415	-0.129535	0.384	0.323	1
Ubxn6	0.0163318	-0.129431	0.153	0.123	1
BC004004	0.374811	-0.129411	0.105	0.094	1
Mrpl28	0.0401389	-0.129388	0.185	0.154	1
Pycr2	0.228567	-0.129277	0.092	0.08	1
Glipr2	0.00447239	-0.129251	0.146	0.113	1
Gars	0.0197758	-0.12923	0.129	0.102	1
Lsm6	0.0548895	-0.128822	0.103	0.084	1
Vdac2	0.249993	-0.128651	0.425	0.378	1
Hspbp1	0.422599	-0.128441	0.058	0.051	1
Adarb1	0.0427956	-0.128349	0.016	0.024	1
Ereg	0.58259	-0.128192	0.015	0.017	1
Ppp2ca	0.129113	-0.128165	0.312	0.271	1
Serhl	0.00116184	-0.127948	0.091	0.064	1
Diaph2	6.96e-05	-0.127324	0.167	0.12	1
Eif2s3x	0.130529	-0.127217	0.202	0.174	1
Dynlrb1	0.000530855	-0.12703	0.297	0.233	1
Hspd1	0.00147842	-0.126957	0.255	0.2	1
Prrg2	0.417184	-0.126872	0.036	0.04	1
Ube2d1	0.810502	-0.126858	0.048	0.046	1
Emg1	0.104026	-0.12685	0.152	0.129	1
Mrpl10	0.739933	-0.126739	0.047	0.048	1
Tecr	0.148038	-0.126619	0.128	0.109	1
Mrpl51	0.001501	-0.126265	0.246	0.192	1
Ssrp1	0.0389769	-0.126207	0.13	0.106	1
Vamp3	0.0179645	-0.125745	0.103	0.08	1
Pfdn5	0.796606	-0.125641	0.557	0.516	1
Commd9	0.014435	-0.12563	0.082	0.062	1
Gorasp2	0.00403887	-0.125503	0.138	0.105	1
Fam32a	0.00027843	-0.125201	0.241	0.183	1
Emc6	0.0324638	-0.125182	0.18	0.147	1
Hnrnpl	0.755045	-0.125135	0.09	0.086	1
Cd300ld	0.844853	-0.125085	0.038	0.038	1
Eif4a3	0.226746	-0.124939	0.081	0.07	1
Gmppa	0.776809	-0.124939	0.042	0.04	1
G3bp1	0.0681961	-0.124653	0.242	0.208	1
Bag1	0.00894094	-0.124532	0.244	0.198	1
Lima1	0.526303	-0.124324	0.06	0.054	1
Snrpe	0.0158961	-0.124294	0.287	0.238	1
Kdm1a	0.0365054	-0.12405	0.065	0.05	1
Tor1aip1	0.00103098	-0.12402	0.209	0.162	1
Ccdc115	0.0098737	-0.123736	0.111	0.086	1
Mical3	0.139019	-0.123731	0.015	0.021	1
Mapre1	0.00216557	-0.12367	0.209	0.165	1
Mtmr7	0.0540858	-0.12357	0.054	0.042	1
Snx20	0.0845963	-0.123212	0.317	0.273	1
Hsd17b7	0.0459246	-0.123118	0.017	0.025	1
Cdc42bpb	0.0270716	-0.122951	0.089	0.07	1
Vkorc1l1	0.593671	-0.12272	0.047	0.043	1
Rin2	0.310479	-0.1224	0.082	0.072	1
Fas	0.00197433	-0.122395	0.086	0.061	1
Mxd4	0.665192	-0.122372	0.051	0.047	1
Leprot	0.0544877	-0.122321	0.227	0.191	1
Cdh1	0.075221	-0.122232	0.014	0.02	1
Echs1	0.00117933	-0.122192	0.238	0.185	1
Asph	0.36237	-0.122053	0.067	0.06	1
C1qbp	0.00119239	-0.122048	0.111	0.08	1
Pkig	0.0175124	-0.122006	0.196	0.161	1
Rtn3	0.100899	-0.121957	0.414	0.358	1
Actr1a	0.0195205	-0.121831	0.094	0.073	1
Tep1	0.830029	-0.121645	0.121	0.115	1
Capns1	0.0222546	-0.121619	0.391	0.331	1
Trip4	0.162329	-0.121575	0.057	0.047	1
Ndufa10	0.00155568	-0.121468	0.148	0.112	1
1110038F14Rik	3.57e-05	-0.121389	0.276	0.209	0.807405
D1Ertd622e	0.0229253	-0.121388	0.079	0.061	1
Nrbp1	0.0675482	-0.121232	0.153	0.129	1
Tomm22	0.0302538	-0.120969	0.3	0.252	1
Ppp2r5c	0.0116753	-0.120895	0.142	0.113	1
Sqle	0.425744	-0.120531	0.031	0.035	1
Stx4a	0.21656	-0.120464	0.319	0.281	1
Actr2	0.0411807	-0.120364	0.404	0.345	1
Eef1akmt1	0.0778241	-0.120198	0.071	0.056	1
Nfu1	0.00130324	-0.119964	0.142	0.106	1
Gpr157	0.203912	-0.11984	0.013	0.017	1
Hpf1	0.0578306	-0.119785	0.071	0.056	1
Lamtor1	0.0293664	-0.119537	0.226	0.19	1
Arf3	0.00672066	-0.119416	0.303	0.247	1
Rarres1	0.690277	-0.119413	0.043	0.039	1
Pqlc1	0.00810868	-0.119324	0.177	0.141	1
Rab1a	0.00112212	-0.119207	0.207	0.161	1
Sar1a	0.00752021	-0.119175	0.247	0.2	1
Nt5c3	0.561569	-0.119167	0.094	0.087	1
Nhp2	0.0360525	-0.119108	0.18	0.149	1
C530008M17Rik	0.0329623	-0.118987	0.013	0.021	1
Atic	0.00523436	-0.118947	0.088	0.065	1
Tpra1	0.195962	-0.118713	0.061	0.052	1
Surf4	0.0304138	-0.118692	0.335	0.286	1
Rpl3l	0.178695	-0.1186	0.021	0.026	1
Pmepa1	0.00139762	-0.118489	0.145	0.109	1
Mark2	0.0236067	-0.118318	0.146	0.118	1
Prps1	0.213357	-0.118173	0.027	0.032	1
Ssb	0.0345725	-0.118115	0.246	0.207	1
Mpp6	0.34702	-0.11801	0.063	0.054	1
Anapc5	0.111129	-0.117927	0.159	0.137	1
H2afx	0.126807	-0.117913	0.059	0.048	1
Pttg1ip	0.00014189	-0.117799	0.23	0.171	1
Pycard	0.110898	-0.117602	0.419	0.368	1
Gramd4	0.703637	-0.117358	0.036	0.034	1
Washc1	0.0657506	-0.117269	0.073	0.058	1
Zbp1	0.0479451	-0.117232	0.375	0.321	1
Cav1	0.406621	-0.11703	0.082	0.074	1
Gna15	0.248111	-0.116777	0.062	0.053	1
2310011J03Rik	0.00194109	-0.116711	0.129	0.097	1
Kcmf1	2.74e-06	-0.116559	0.162	0.11	0.0619144
Zfp710	0.0693828	-0.116469	0.06	0.047	1
Wars	0.0251516	-0.116353	0.335	0.283	1
Gmppb	0.00113236	-0.116203	0.08	0.055	1
Twf2	0.0660934	-0.116049	0.165	0.14	1
Smc4	0.000428353	-0.115966	0.089	0.061	1
Ubald2	0.011468	-0.115532	0.222	0.182	1
Galns	0.0441999	-0.115332	0.136	0.112	1
Dctn4	0.00576304	-0.115288	0.152	0.119	1
Trir	0.00249983	-0.115288	0.298	0.239	1
Parvg	0.0217762	-0.11508	0.122	0.097	1
Rab44	0.00061458	-0.114964	0.006	0.016	1
Cib1	0.00960142	-0.114932	0.196	0.158	1
Reps2	0.227691	-0.114926	0.015	0.019	1
Napg	0.0814445	-0.114789	0.141	0.118	1
Psmb5	0.126168	-0.114341	0.408	0.358	1
Calu	0.00713438	-0.114337	0.179	0.142	1
Slc12a9	0.0513305	-0.114043	0.062	0.048	1
Mrpl17	0.00443277	-0.11399	0.135	0.102	1
Bckdha	0.257964	-0.113937	0.106	0.092	1
Ing4	0.0258476	-0.113902	0.09	0.071	1
Prune2	0.583429	-0.113724	0.043	0.038	1
Mcoln1	0.247678	-0.113611	0.056	0.047	1
Wdr11	0.184388	-0.113527	0.042	0.034	1
Phkg2	0.339437	-0.113314	0.049	0.042	1
Vma21	0.00210909	-0.113075	0.148	0.113	1
Srd5a3	0.0136596	-0.112787	0.111	0.086	1
Lfng	0.369738	-0.112768	0.053	0.059	1
Nlrx1	0.69468	-0.112701	0.041	0.038	1
Snrpc	0.101209	-0.112641	0.149	0.126	1
Rtp4	0.393025	-0.112605	0.087	0.078	1
Dpagt1	0.666481	-0.112511	0.075	0.07	1
Ifih1	0.000239765	-0.112481	0.103	0.071	1
Myo7a	0.120605	-0.112437	0.07	0.058	1
Cd63	0.0427774	-0.112354	0.721	0.731	1
Tmem147	0.469892	-0.111872	0.068	0.061	1
Gpsm3	0.132836	-0.111773	0.273	0.236	1
Fkbp5	0.215203	-0.111699	0.017	0.021	1
Mob3b	0.00177911	-0.111249	0.082	0.058	1
Khdrbs1	0.0355778	-0.111231	0.155	0.128	1
Uqcc3	9.4e-05	-0.111176	0.217	0.16	1
Pbdc1	0.000922772	-0.110844	0.119	0.086	1
Paip2	0.00166283	-0.110806	0.141	0.107	1
Arhgap17	0.0260404	-0.110784	0.145	0.118	1
Capn15	0.956177	-0.11073	0.072	0.071	1
Ociad1	0.00167854	-0.110667	0.127	0.096	1
Cct7	0.000131719	-0.110588	0.235	0.179	1
Uqcr10	0.030276	-0.11053	0.402	0.345	1
Ghitm	0.00321847	-0.110345	0.248	0.198	1
Rars	0.000120473	-0.110287	0.15	0.107	1
Ech1	0.0382476	-0.110238	0.109	0.088	1
Ctr9	0.881897	-0.110206	0.037	0.037	1
Guk1	0.00803504	-0.110019	0.183	0.146	1
Ifit2	0.00177943	-0.109937	0.129	0.097	1
Ggt5	0.00375864	-0.109909	0.01	0.02	1
Sfr1	0.000268775	-0.109869	0.148	0.109	1
Edem1	1.51e-05	-0.109651	0.246	0.183	0.341862
Chmp3	0.00119534	-0.109423	0.18	0.137	1
Parp11	0.054989	-0.109324	0.101	0.082	1
Ap1s2	0.603621	-0.109241	0.035	0.032	1
Hmgcl	0.0878291	-0.109145	0.099	0.081	1
Eif3k	0.0395601	-0.109108	0.398	0.34	1
Mrpl37	0.0536513	-0.109014	0.06	0.047	1
Uqcr11	0.16384	-0.10901	0.479	0.421	1
Axl	0.317593	-0.108993	0.369	0.331	1
Rtraf	0.000122672	-0.108956	0.269	0.207	1
Osbpl11	0.0859602	-0.108783	0.06	0.048	1
Zfp869	0.522703	-0.108764	0.059	0.054	1
Sypl	0.00041856	-0.108723	0.198	0.15	1
Syne2	0.712321	-0.108712	0.024	0.022	1
Rhoa	0.0940266	-0.108682	0.502	0.442	1
Cdk14	0.473871	-0.108592	0.04	0.035	1
AU040320	0.211749	-0.108572	0.036	0.029	1
Tceanc2	0.741584	-0.108528	0.059	0.056	1
Akt2	0.0210058	-0.108327	0.127	0.102	1
Adcy4	0.47814	-0.108262	0.037	0.033	1
Ldlr	0.289766	-0.108214	0.122	0.109	1
Neurl4	0.152371	-0.108059	0.036	0.029	1
G0s2	0.114705	-0.108012	0.007	0.011	1
Gatd3a	0.67485	-0.107897	0.047	0.043	1
Pkib	0.292916	-0.107804	0.056	0.048	1
Cog3	0.19877	-0.107765	0.028	0.022	1
Dcaf12	0.0445587	-0.107691	0.086	0.069	1
Epcam	0.00857837	-0.107687	0.012	0.021	1
Tyk2	0.000219927	-0.107609	0.088	0.059	1
Elavl1	0.0492581	-0.107413	0.133	0.11	1
9530068E07Rik	0.00182476	-0.107375	0.306	0.246	1
Eed	0.163065	-0.107196	0.051	0.042	1
Bcas3	0.0550592	-0.10713	0.041	0.031	1
Cd300a	0.0223941	-0.107111	0.145	0.117	1
2510009E07Rik	0.0362145	-0.107082	0.068	0.052	1
Snap23	0.0225029	-0.106517	0.114	0.09	1
Dhx30	0.295342	-0.106429	0.066	0.058	1
Lipe	0.0604185	-0.106413	0.065	0.051	1
Zfp703	0.274246	-0.106284	0.088	0.078	1
Cox7a2l	0.19103	-0.106061	0.458	0.409	1
Brk1	0.011854	-0.105695	0.332	0.277	1
Treml4	0.00594764	-0.105594	0.01	0.02	1
Brd7	0.0181684	-0.105585	0.112	0.089	1
Far1	0.298844	-0.105519	0.093	0.082	1
Spire1	0.248311	-0.105489	0.036	0.029	1
Cnih1	0.00913208	-0.105376	0.112	0.087	1
Pus1	0.276431	-0.105256	0.064	0.055	1
Vamp5	0.0296099	-0.105206	0.083	0.064	1
Ier3ip1	0.0443829	-0.105178	0.243	0.205	1
Ikbkb	0.000478472	-0.105136	0.184	0.139	1
Zmat5	0.0113629	-0.10489	0.073	0.054	1
Rps27l	0.0322604	-0.104829	0.427	0.369	1
Chid1	0.00267967	-0.104743	0.08	0.056	1
Lamtor3	4.64e-07	-0.104679	0.207	0.142	0.0105041
Nrde2	0.203145	-0.104535	0.05	0.041	1
Ttc7	0.0366398	-0.104405	0.147	0.122	1
Zfp768	0.631977	-0.104343	0.018	0.02	1
Apex1	0.0423206	-0.104202	0.08	0.062	1
Plaa	0.000810307	-0.104122	0.12	0.087	1
Wdfy4	0.0762275	-0.104116	0.086	0.07	1
Cluh	0.396228	-0.104104	0.053	0.047	1
Rab11a	0.000510845	-0.104087	0.24	0.187	1
Csnk2b	0.00112389	-0.104023	0.22	0.171	1
Srsf1	0.0883991	-0.103727	0.094	0.078	1
Elp5	0.000546725	-0.103688	0.078	0.052	1
Stard5	0.00866985	-0.103556	0.074	0.054	1
Bub1b	0.267759	-0.103511	0.06	0.051	1
Ccdc25	0.0111578	-0.103375	0.107	0.082	1
Tox4	0.00161731	-0.103321	0.135	0.101	1
Ifit3	0.125879	-0.103283	0.027	0.034	1
Aagab	0.0437145	-0.103255	0.09	0.072	1
Banf1	0.0185476	-0.103105	0.148	0.119	1
Atp6v1c1	0.0563916	-0.103045	0.237	0.201	1
Glud1	0.00570653	-0.10304	0.197	0.157	1
Awat1	8.85e-05	-0.102934	0.001	0.01	1
Pts	0.00143438	-0.102773	0.068	0.046	1
Araf	0.160523	-0.10259	0.07	0.059	1
Snx15	0.00411708	-0.102501	0.09	0.066	1
Ctnnbip1	0.0714031	-0.102486	0.087	0.07	1
Cript	0.00187675	-0.102276	0.145	0.11	1
Mdh1	0.0107674	-0.102222	0.204	0.165	1
Cat	0.00798249	-0.102126	0.113	0.086	1
AU022252	0.950568	-0.1019	0.027	0.026	1
Nfia	0.592274	-0.101878	0.029	0.031	1
Clasp2	0.0151345	-0.101855	0.088	0.068	1
Mrps16	0.00557819	-0.101833	0.174	0.136	1
Dnmt1	0.00479662	-0.101829	0.098	0.073	1
Itsn2	0.000110746	-0.101787	0.155	0.112	1
Slc15a4	0.273552	-0.101755	0.085	0.074	1
Snrpa	0.805024	-0.101624	0.067	0.064	1
Psmc3	0.00025086	-0.101619	0.235	0.18	1
Ssr3	0.00245759	-0.101482	0.304	0.247	1
BC005537	0.784281	-0.101372	0.515	0.476	1
Gmds	0.0159667	-0.101249	0.061	0.044	1
Rnf141	0.509568	-0.101236	0.047	0.042	1
Dnajc11	0.0253546	-0.101089	0.076	0.058	1
Dcp2	0.00162611	-0.100971	0.085	0.06	1
C77080	0.00415351	-0.100914	0.083	0.059	1
Ndufs4	0.000869848	-0.100901	0.18	0.135	1
Tbc1d13	0.215481	-0.1007	0.126	0.11	1
Ywhaz	0.00490076	-0.10068	0.341	0.28	1
Tnks2	0.0318486	-0.100617	0.11	0.088	1
Egln2	0.00172866	-0.100596	0.118	0.087	1
Ncf1	0.790357	-0.100571	0.43	0.399	1
Mmd	0.93336	-0.100533	0.029	0.029	1
Ddx46	0.0900583	-0.100505	0.122	0.102	1
CAAA01118383.1	0.0212354	-0.100485	0.163	0.133	1
Uspl1	0.385051	-0.10035	0.035	0.03	1
Hemk1	0.0621189	-0.100342	0.016	0.024	1
Map11	0.000305346	-0.100241	0.116	0.083	1
Smc3	0.121775	-0.100037	0.048	0.038	1
Emc8	0.0031516	-0.0999768	0.118	0.088	1
Pwwp3a	0.749002	-0.099956	0.051	0.048	1
Polr2e	0.00134872	-0.0998875	0.138	0.103	1
Psmd11	0.00487165	-0.0995924	0.165	0.13	1
Nr1h3	0.233852	-0.0995461	0.183	0.163	1
Drap1	0.000111163	-0.0993306	0.203	0.152	1
Stk38	0.131423	-0.0991999	0.181	0.157	1
Lin37	0.978595	-0.0990666	0.03	0.03	1
Crat	0.197519	-0.098759	0.067	0.057	1
Noct	0.453432	-0.0986747	0.03	0.034	1
Dolpp1	0.708912	-0.0985122	0.048	0.049	1
Hif1an	0.938957	-0.0984699	0.027	0.026	1
Gmcl1	0.215746	-0.0984202	0.045	0.038	1
Pnpla7	1.93e-05	-0.0983719	0.172	0.119	0.437759
Kif1b	0.00101761	-0.0980038	0.097	0.07	1
Zdhhc9	0.107009	-0.0979503	0.082	0.068	1
Eif3d	0.0494077	-0.0978556	0.171	0.143	1
Pnpla2	9.03e-05	-0.0978358	0.163	0.117	1
Tnfaip1	0.00156078	-0.0978346	0.065	0.044	1
Stmn1	0.638089	-0.0977749	0.021	0.022	1
Psmd14	0.0462075	-0.097759	0.087	0.07	1
Snx10	0.0394207	-0.0977467	0.459	0.396	1
Dpp7	0.0312505	-0.0977031	0.106	0.085	1
Hnrnpk	0.0136063	-0.0976504	0.407	0.345	1
Ergic3	0.000470862	-0.0976172	0.16	0.119	1
Vat1	0.0197271	-0.097506	0.384	0.325	1
Arfrp1	0.00595209	-0.0974907	0.068	0.049	1
Add3	0.738065	-0.097471	0.026	0.027	1
Dok2	0.17807	-0.097131	0.105	0.089	1
Tprgl	0.0387199	-0.0970472	0.126	0.103	1
Serbp1	0.0014378	-0.0970226	0.304	0.243	1
Txnrd2	0.378472	-0.096979	0.042	0.036	1
Prom1	0.0192719	-0.096968	0.009	0.017	1
Slc27a4	0.0443872	-0.0969537	0.066	0.051	1
Aim2	0.00695173	-0.0968475	0.106	0.08	1
Itpripl2	0.0158207	-0.0968318	0.202	0.166	1
1110004F10Rik	0.000571222	-0.0967553	0.114	0.081	1
Patl1	0.100832	-0.0966773	0.051	0.041	1
Plk3	0.588186	-0.0965229	0.144	0.134	1
Mrpl41	0.00487972	-0.0963667	0.1	0.074	1
Cstf2t	0.961459	-0.0963518	0.029	0.028	1
Ppp1r14b	0.000742125	-0.0961422	0.301	0.239	1
Ilrun	0.00402851	-0.0960116	0.319	0.259	1
Slc35c1	0.319579	-0.0959598	0.044	0.038	1
Fxr1	0.00355225	-0.0959395	0.106	0.079	1
Bin3	0.0382107	-0.0959093	0.1	0.08	1
Rassf5	0.819509	-0.0958312	0.075	0.072	1
Bckdhb	5.64e-05	-0.0957697	0.083	0.053	1
Ndufb2	0.00264847	-0.095648	0.198	0.155	1
Ybx1	0.0479638	-0.0954834	0.456	0.395	1
Lyz2	0.0445868	-0.0954425	0.903	0.91	1
Pex11g	0.651446	-0.0952666	0.03	0.032	1
Chmp5	7.89e-06	-0.0952425	0.222	0.159	0.178604
Phf11b	0.000161842	-0.0951317	0.084	0.056	1
Mrps17	0.000156498	-0.0951152	0.142	0.101	1
Ptp4a2	0.0044599	-0.0949632	0.343	0.283	1
H1f0	0.252276	-0.0949341	0.036	0.03	1
Grip2	0.0220759	-0.0948226	0.051	0.037	1
Atraid	0.000994769	-0.0947446	0.148	0.111	1
Miip	0.326219	-0.0945922	0.04	0.034	1
Tmbim6	0.211206	-0.0945844	0.634	0.607	1
Tap2	0.00599045	-0.0945784	0.522	0.442	1
Rab2a	1.82e-07	-0.0945224	0.238	0.166	0.00410946
Pigt	0.00404843	-0.0944645	0.179	0.142	1
Lpcat3	0.0221233	-0.0943185	0.094	0.074	1
Sertad3	0.684013	-0.0942072	0.018	0.017	1
Rab5b	0.000928693	-0.0941569	0.108	0.077	1
Atf1	0.266006	-0.0941556	0.058	0.05	1
Pik3r5	0.0211054	-0.0939613	0.141	0.114	1
Tm7sf3	0.000272543	-0.0938303	0.101	0.07	1
Bscl2	8.51e-05	-0.0937339	0.272	0.207	1
Bad	0.0192091	-0.0936616	0.079	0.06	1
Nudt3	0.00449347	-0.0935963	0.204	0.164	1
Usp33	0.184996	-0.093558	0.036	0.029	1
Chmp1a	0.000941284	-0.0935012	0.157	0.118	1
Cfp	0.0315118	-0.0933324	0.109	0.087	1
Ubl7	0.381347	-0.0933009	0.035	0.03	1
Sdcbp	0.707219	-0.093268	0.616	0.569	1
Mob4	5.53e-05	-0.0931209	0.127	0.088	1
Daxx	0.00350718	-0.0931184	0.1	0.074	1
Dgcr6	0.0418077	-0.093074	0.071	0.055	1
Rars2	0.639314	-0.092978	0.017	0.019	1
Aph1b	0.688931	-0.0928702	0.012	0.013	1
Gnai3	0.000450933	-0.0928209	0.151	0.111	1
Def6	0.136808	-0.0926866	0.07	0.058	1
E2f2	0.00147164	-0.0926092	0.009	0.02	1
Utp14a	0.114483	-0.0925736	0.052	0.042	1
Retreg2	0.00612545	-0.0924052	0.178	0.142	1
Mgmt	0.107866	-0.0923599	0.05	0.039	1
Abce1	0.0809968	-0.0922884	0.071	0.058	1
Fip1l1	0.00222301	-0.092286	0.104	0.076	1
Coq7	0.00157628	-0.0922731	0.082	0.057	1
Hist1h2bc	0.0106546	-0.0921046	0.241	0.2	1
Scand1	0.449757	-0.0920988	0.519	0.465	1
Micu2	0.456777	-0.0920968	0.044	0.039	1
Dock8	0.75115	-0.0920913	0.033	0.034	1
Atp5l	0.759766	-0.0920874	0.635	0.588	1
Slc22a18	0.946209	-0.0919772	0.026	0.026	1
Amdhd2	0.0710207	-0.0919734	0.255	0.222	1
Atp6v0b	0.482423	-0.0919676	0.737	0.686	1
Gcnt1	0.576145	-0.0919462	0.028	0.03	1
Tbc1d17	0.115255	-0.0919449	0.081	0.067	1
Myo9b	0.00708662	-0.0918598	0.243	0.199	1
Dynll2	0.0865993	-0.0917438	0.121	0.101	1
Myo1e	0.0075111	-0.0917086	0.157	0.124	1
Eif3j1	0.133843	-0.0917007	0.052	0.043	1
Kcnn3	0.00214015	-0.0916374	0.007	0.016	1
Ube2c	0.0126479	-0.09157	0.004	0.01	1
Fam118b	0.0746278	-0.0914977	0.029	0.038	1
Cap1	5.49e-05	-0.091383	0.197	0.145	1
Senp2	0.00873234	-0.0913374	0.17	0.136	1
2310022A10Rik	0.286567	-0.0909646	0.075	0.066	1
Tacc2	0.00618387	-0.090909	0.007	0.016	1
Tap1	0.204116	-0.0908926	0.633	0.573	1
Rnmt	0.0101673	-0.0907622	0.085	0.064	1
Dapk1	0.0251753	-0.0907268	0.157	0.128	1
Hddc2	0.519909	-0.0907232	0.048	0.043	1
Pgd	0.015167	-0.0906493	0.438	0.372	1
Ptk2b	0.000312211	-0.0905315	0.216	0.166	1
Arhgap25	0.000498319	-0.0904919	0.105	0.074	1
Gpank1	0.264606	-0.0903519	0.052	0.045	1
Syf2	9.43e-06	-0.0903487	0.189	0.134	0.213449
Aph1c	0.0277348	-0.0902886	0.081	0.063	1
Rad23a	0.149169	-0.0901492	0.073	0.061	1
Nr2f6	0.0383731	-0.0900915	0.077	0.06	1
Eprs	0.00128106	-0.0900735	0.166	0.127	1
Mtch1	0.00353786	-0.0900344	0.194	0.153	1
Clns1a	0.148588	-0.0900309	0.05	0.041	1
Cyp4f13	0.0423685	-0.0900157	0.048	0.036	1
Ankrd46	0.52986	-0.0898189	0.02	0.022	1
Cand1	0.014716	-0.0897454	0.075	0.056	1
Ccdc88c	0.235679	-0.0896999	0.007	0.01	1
Psmd8	0.0764848	-0.0896034	0.362	0.317	1
Arhgap26.1	0.0046955	-0.0895987	0.006	0.014	1
Sidt2	0.000427891	-0.0894707	0.187	0.14	1
Mapkapk2	0.163849	-0.0892833	0.414	0.361	1
Tbc1d22b	0.198067	-0.0892739	0.035	0.028	1
St3gal4	0.594407	-0.0892737	0.047	0.043	1
Cisd2	6.39e-05	-0.0892277	0.193	0.141	1
Cdk9	0.00463052	-0.0890914	0.281	0.228	1
Coq8b	0.0537747	-0.0890665	0.057	0.044	1
Snw1	9.66e-05	-0.0888263	0.145	0.103	1
Nagk	0.00186643	-0.0888187	0.138	0.104	1
Plaur	0.112879	-0.0887198	0.214	0.186	1
Nudt21	0.0183384	-0.0886325	0.09	0.07	1
Mtch2	0.0303019	-0.0886036	0.127	0.103	1
Nol12	0.0317654	-0.0885691	0.07	0.054	1
Pfdn6	0.000156199	-0.0885444	0.136	0.097	1
Rubcnl	0.476149	-0.0884955	0.022	0.019	1
Ppfia4	0.560599	-0.0884821	0.025	0.028	1
Lepr	0.498237	-0.0884773	0.022	0.019	1
Hccs	0.190292	-0.0884521	0.052	0.043	1
Capza1	0.00165606	-0.0883456	0.175	0.135	1
Uchl5	0.0831399	-0.0883423	0.04	0.03	1
Maf1	0.00567154	-0.0882834	0.098	0.073	1
Prxl2a	0.789635	-0.0881859	0.026	0.027	1
2610002M06Rik	0.267309	-0.0881747	0.045	0.038	1
Pcid2	0.40617	-0.0881604	0.024	0.027	1
Afp	0.549502	-0.0881443	0.019	0.021	1
Dapk3	0.0132828	-0.0881059	0.068	0.05	1
Psen2	0.0345485	-0.0880683	0.262	0.222	1
Gmfb	4.87e-05	-0.087978	0.186	0.135	1
Lamp2	0.101108	-0.0879493	0.484	0.43	1
Mmadhc	0.210115	-0.0879265	0.064	0.054	1
Wdr43	0.7225	-0.0878415	0.047	0.044	1
Bcat2	0.0241187	-0.0876606	0.081	0.062	1
Polr2f	0.00129163	-0.0875173	0.258	0.204	1
Soat1	0.168592	-0.0874367	0.426	0.375	1
Rpl14	0.615175	-0.0873733	0.597	0.545	1
Lrrc59	0.0017313	-0.0872664	0.128	0.095	1
Plin3	0.00185862	-0.0872587	0.154	0.118	1
Abhd17b	0.000158042	-0.0870889	0.058	0.035	1
Cxcl14	0.0999093	-0.0870331	0.014	0.02	1
Sf3a1	0.133164	-0.0869844	0.047	0.038	1
Map4k1	0.715688	-0.0869828	0.036	0.034	1
Clec16a	0.0468573	-0.0869517	0.04	0.029	1
Yars	0.0519384	-0.086915	0.053	0.041	1
Zfp608	0.726983	-0.0868435	0.027	0.028	1
Alox5	0.0162594	-0.0868377	0.008	0.016	1
Gtf2f2	0.00714502	-0.0868112	0.063	0.045	1
B4galt3	0.00679567	-0.0867921	0.071	0.051	1
Chmp2b	0.00721319	-0.0867838	0.097	0.073	1
Creld2	6.73e-05	-0.0867404	0.128	0.089	1
Cdc37	4.56e-05	-0.0867134	0.196	0.143	1
Rab31	0.155541	-0.0865901	0.078	0.066	1
Cmpk2	0.209229	-0.0864391	0.022	0.027	1
Rnf121	0.206453	-0.0863778	0.043	0.036	1
Cdkn2aipnl	0.899857	-0.0862373	0.039	0.039	1
Engase	0.816299	-0.0861631	0.027	0.027	1
Pprc1	0.261017	-0.0860742	0.029	0.024	1
Ppp2r5d	0.64933	-0.0860446	0.036	0.033	1
Tmem41a	0.817147	-0.0860289	0.014	0.015	1
Map1lc3a	0.0122876	-0.0860016	0.113	0.088	1
Msr1	0.00130316	-0.0859278	0.189	0.147	1
Nub1	0.0014985	-0.0857359	0.175	0.134	1
Usf1	0.361501	-0.0857093	0.102	0.091	1
Mettl14	0.254281	-0.0856829	0.036	0.03	1
Abhd4	0.0332966	-0.0854893	0.046	0.034	1
Ciao2a	0.000101232	-0.08543	0.177	0.13	1
Rab19	0.589659	-0.0853664	0.022	0.02	1
Rap1a	2.08e-05	-0.0853153	0.221	0.162	0.470356
Rhog	0.0107789	-0.0852922	0.203	0.166	1
Faf1	0.114519	-0.0852563	0.041	0.032	1
Tarbp2	0.00411233	-0.0852316	0.057	0.039	1
Ugp2	0.00315844	-0.0851496	0.144	0.111	1
Nploc4	0.00304882	-0.0851433	0.09	0.066	1
Vps35l	0.000403957	-0.0851106	0.15	0.11	1
Rnf181	0.00947127	-0.0851091	0.133	0.103	1
Ap1g2	0.889264	-0.0851023	0.028	0.028	1
Cdk16	0.0183187	-0.0849969	0.065	0.049	1
Usp14	0.00258113	-0.0849566	0.091	0.066	1
Ube2l3	0.00749898	-0.0848441	0.328	0.271	1
Tram1	0.0349204	-0.0847442	0.131	0.108	1
Btnl4	0.220296	-0.0846883	0.012	0.016	1
Hsd17b12	0.00048349	-0.0846845	0.149	0.11	1
Sap30l	0.00206643	-0.0846362	0.068	0.047	1
Chp1	0.00286867	-0.0845521	0.157	0.121	1
6430548M08Rik	0.304043	-0.0845394	0.018	0.022	1
Asl	0.00519314	-0.084538	0.092	0.068	1
C2cd2l	0.106162	-0.0842444	0.067	0.054	1
Alkbh2	0.0700633	-0.0841319	0.043	0.033	1
Arl8b	0.000202161	-0.0840601	0.235	0.179	1
Tfe3	0.0209261	-0.0840549	0.087	0.068	1
Gpn1	0.258219	-0.083964	0.044	0.037	1
Pgpep1	0.00754083	-0.0838824	0.075	0.055	1
Clptm1l	5.48e-05	-0.0838551	0.232	0.174	1
Cdk5rap2	0.013155	-0.0837695	0.043	0.03	1
Colec12	7.01e-07	-0.0837513	0.093	0.054	0.0158712
Atp5a1	0.024537	-0.0836183	0.405	0.348	1
Ifit1	0.152617	-0.0835809	0.072	0.061	1
Cdc25a	0.539789	-0.0835569	0.02	0.022	1
Vps35	6.17e-06	-0.0834648	0.155	0.106	0.139548
Zfyve19	0.263197	-0.0833746	0.02	0.024	1
Gtf3c6	0.0837871	-0.0833132	0.072	0.058	1
Mospd1	0.912279	-0.0832943	0.027	0.027	1
Zbtb8os	0.000295382	-0.0831875	0.129	0.092	1
Myd88	0.063952	-0.0830462	0.137	0.115	1
Psmg3	0.0312938	-0.0830057	0.08	0.063	1
Tmem43	0.00219385	-0.0829381	0.077	0.054	1
Polr2g	0.000863503	-0.0827946	0.286	0.226	1
Mcrs1	0.000552918	-0.0827883	0.086	0.059	1
Tm2d1	2.34e-05	-0.0827579	0.137	0.093	0.529106
Kars	0.00158546	-0.082463	0.11	0.08	1
Dap3	0.00713079	-0.0824086	0.094	0.071	1
Stard3nl	0.181933	-0.0823603	0.103	0.089	1
Il17ra	8.87e-05	-0.0823481	0.178	0.13	1
Frg1	0.0291175	-0.0823378	0.093	0.074	1
Mrps18b	0.121012	-0.082326	0.056	0.045	1
Zdhhc4	0.400282	-0.0822294	0.033	0.029	1
Blcap	0.000111365	-0.082142	0.106	0.073	1
Cd81	0.0135358	-0.082111	0.088	0.067	1
Fen1	0.0744726	-0.0820744	0.035	0.026	1
Grb2	0.0309713	-0.0820084	0.442	0.383	1
Gpatch11	0.0312578	-0.0819896	0.04	0.029	1
Itpr2	0.0194944	-0.081938	0.181	0.148	1
Uri1	0.0245734	-0.0819247	0.045	0.032	1
Ppp5c	0.119611	-0.0818456	0.055	0.045	1
Ptdss1	0.0984703	-0.0817332	0.058	0.046	1
Stx6	0.100966	-0.0817206	0.079	0.065	1
Rap2c	0.00621421	-0.0816606	0.136	0.105	1
Camk1d	0.109897	-0.081641	0.058	0.047	1
Rfk	0.00393589	-0.0815933	0.067	0.047	1
Esco1	0.200458	-0.0815648	0.053	0.045	1
Hnrnpf	0.00133045	-0.0814745	0.326	0.264	1
Mpnd	0.174166	-0.0812782	0.084	0.072	1
Slc52a3	0.151202	-0.0812417	0.011	0.015	1
Dhrs7	4.38e-05	-0.0811805	0.14	0.098	0.990849
Nop9	0.0504756	-0.0811379	0.038	0.028	1
Mob3a	0.348881	-0.0809833	0.049	0.042	1
Thumpd1	0.0243232	-0.0809454	0.05	0.036	1
Stim2	0.0183504	-0.0809368	0.051	0.037	1
Atp13a1	0.000323327	-0.0809266	0.171	0.127	1
Camk2g	0.874385	-0.0809105	0.026	0.025	1
Tanc2	0.013175	-0.08079	0.042	0.029	1
Rcc1	0.848864	-0.0806451	0.026	0.025	1
Rilpl2	0.028651	-0.0805598	0.214	0.18	1
Tmem51	0.0212503	-0.080532	0.128	0.102	1
Scarb2	0.00730521	-0.0804638	0.394	0.33	1
Becn1	0.000994058	-0.0803899	0.134	0.099	1
Akt1s1	0.0127921	-0.0803833	0.091	0.069	1
Ahdc1	0.0995735	-0.0803795	0.005	0.009	1
Akirin2	0.0156283	-0.0803447	0.063	0.047	1
Ipmk	0.00166887	-0.0802984	0.101	0.074	1
Diablo	0.0574406	-0.0801642	0.058	0.045	1
Cxcr1	0.143015	-0.0801633	0.006	0.01	1
Asb4	0.81808	-0.080162	0.021	0.02	1
Ssbp3	0.0474764	-0.0801477	0.007	0.012	1
Tprkb	0.0515396	-0.0800613	0.042	0.031	1
Babam1	0.0149831	-0.0800423	0.081	0.062	1
Lcp2	0.000416013	-0.0800377	0.216	0.166	1
Faap20	0.0358698	-0.0799448	0.088	0.07	1
mt-Nd6	0.918419	-0.0798646	0.03	0.03	1
Lsm7	0.0602351	-0.0798241	0.09	0.073	1
Arl11	0.000104939	-0.0797309	0.133	0.093	1
Gmfg	0.0242882	-0.0797141	0.374	0.319	1
Fut7	0.189942	-0.0796797	0.01	0.014	1
Stk11	5.51e-05	-0.0796761	0.163	0.117	1
Dhcr7	0.546563	-0.0796683	0.068	0.062	1
Clec2d	0.277278	-0.0796517	0.158	0.143	1
Ndufv1	0.00170889	-0.0794144	0.132	0.099	1
Pcyt2	0.678566	-0.0794045	0.046	0.043	1
Nfkb1	0.000451997	-0.0792412	0.341	0.273	1
Mrps10	0.140764	-0.0792235	0.054	0.044	1
Tmem205	1.65e-05	-0.079197	0.145	0.1	0.373037
Nfam1	0.104054	-0.0790899	0.123	0.104	1
Cpne8	0.0486258	-0.0790668	0.04	0.029	1
Ublcp1	0.00197567	-0.0790442	0.057	0.037	1
Ubl4a	0.00802006	-0.0790369	0.091	0.068	1
Mrgbp	0.174693	-0.0790023	0.029	0.023	1
3830406C13Rik	0.000149057	-0.0789688	0.073	0.047	1
Emsy	0.183698	-0.0789213	0.057	0.047	1
Fam45a	0.838117	-0.0789078	0.03	0.029	1
Cbr2	0.100596	-0.0788971	0	0.002	1
Srp9	0.00160517	-0.0788277	0.376	0.306	1
Lcmt1	0.124363	-0.0787171	0.063	0.051	1
Nek7	0.000548712	-0.0786208	0.101	0.071	1
Cenpb	0.00629606	-0.078536	0.205	0.164	1
Colgalt1	0.0132521	-0.0784768	0.344	0.288	1
Dhdds	0.0337777	-0.0784496	0.073	0.057	1
Dnlz	0.00736315	-0.0783082	0.088	0.066	1
Hacd3	0.282564	-0.0782477	0.037	0.031	1
Gcc2	0.0147436	-0.07823	0.064	0.047	1
Adipor1	0.00337022	-0.0781035	0.207	0.166	1
Stk19	0.282794	-0.0780542	0.099	0.087	1
Parp9	3.93e-05	-0.0780308	0.197	0.144	0.889439
Dcps	0.954167	-0.0780145	0.025	0.025	1
Xlr	0.622898	-0.077983	0.032	0.034	1
Sdccag8	0.154014	-0.077917	0.031	0.024	1
Haghl	0.00375164	-0.0778763	0.068	0.048	1
Metap1	0.000356198	-0.0778717	0.117	0.084	1
Isg15	0.096062	-0.0778023	0.384	0.335	1
Paox	0.000378533	-0.0777641	0.072	0.047	1
Wdr83	0.953613	-0.0777487	0.025	0.025	1
Faim	0.000106069	-0.0777297	0.089	0.059	1
Msantd4	0.0495053	-0.0776975	0.036	0.026	1
Mak	0.124469	-0.0776707	0.014	0.02	1
Egfem1	0.620665	-0.0775892	0.02	0.022	1
Mapkap1	0.22615	-0.0775807	0.064	0.054	1
Wdr45b	0.0157842	-0.0775668	0.09	0.07	1
Ifi207	0.000890566	-0.0775376	0.129	0.096	1
Tusc1	0.163214	-0.0774821	0.045	0.036	1
Pepd	0.00147498	-0.0774437	0.136	0.101	1
Mthfd2	0.13883	-0.0773419	0.058	0.048	1
Adck1	0.172024	-0.077287	0.026	0.02	1
Dhx16	0.857176	-0.0772716	0.036	0.035	1
Xpo7	0.149443	-0.0772054	0.037	0.029	1
Slu7	0.151697	-0.0771956	0.058	0.048	1
Dusp22	0.0269762	-0.0769635	0.037	0.026	1
Tmem222	0.00280422	-0.0769151	0.097	0.071	1
Timm22	0.174502	-0.0769141	0.067	0.056	1
Suv39h1	0.521369	-0.0768097	0.013	0.015	1
Cnga1	0.216011	-0.07677	0.004	0.007	1
Glul	0.166579	-0.0766917	0.243	0.214	1
Cyth3	0.662977	-0.0765972	0.079	0.074	1
Agap3	0.0279489	-0.0765472	0.071	0.055	1
Slc35a4	0.014675	-0.0765234	0.076	0.057	1
Wipf1	0.000758916	-0.0763358	0.162	0.122	1
Mrpl19	0.0449239	-0.0762943	0.041	0.03	1
Ndufb3	0.0133397	-0.076222	0.369	0.308	1
Fam120a	0.00280453	-0.0761963	0.132	0.101	1
Tollip	0.000905063	-0.0761282	0.141	0.105	1
Smu1	0.0017779	-0.0760836	0.103	0.075	1
Phospho2	0.151785	-0.0759919	0.016	0.022	1
Ezr	0.0758134	-0.0759811	0.128	0.108	1
Srp54a	0.187494	-0.0759008	0.052	0.044	1
Tpm3-rs7	0.490879	-0.0758554	0.021	0.024	1
Arnt	0.0484435	-0.0758172	0.048	0.036	1
Tlr8	0.610264	-0.0756427	0.033	0.03	1
Vps37b	0.857016	-0.075601	0.027	0.026	1
Naip6	0.724554	-0.0755892	0.019	0.017	1
Park7	1.85e-06	-0.0755861	0.229	0.165	0.0417714
Exosc5	0.144757	-0.0754901	0.099	0.084	1
Nqo2	0.512912	-0.0754771	0.028	0.025	1
Sergef	0.785655	-0.0754239	0.031	0.03	1
Ndufa9	0.00114601	-0.0754114	0.115	0.083	1
Ap1b1	0.000117206	-0.07522	0.096	0.064	1
Gpd1l	0.757102	-0.0752133	0.03	0.029	1
Zfp362	0.69711	-0.075211	0.027	0.025	1
Smpdl3b	0.00447083	-0.0751086	0.411	0.344	1
Atp5b	0.00110506	-0.0750663	0.36	0.294	1
Gid8	0.0318694	-0.0750458	0.068	0.052	1
Isy1	0.590069	-0.0750114	0.042	0.045	1
Smim20	0.00483551	-0.0749951	0.061	0.042	1
Acbd6	6.03e-05	-0.074979	0.149	0.106	1
Nudcd2	0.00161019	-0.0749375	0.094	0.068	1
Kif3b	0.00539372	-0.0748599	0.069	0.049	1
Nol4l	0.434512	-0.0747787	0.03	0.026	1
Tomm70a	0.000942194	-0.0747517	0.1	0.071	1
Ap1g1	0.000485675	-0.0747156	0.102	0.072	1
Eif2a	0.139891	-0.0746407	0.055	0.045	1
Smim19	0.0172242	-0.0746029	0.056	0.041	1
Raly	0.0112502	-0.0741872	0.122	0.096	1
Smurf2	0.331489	-0.0741736	0.034	0.029	1
Cpsf6	0.045715	-0.0740798	0.107	0.087	1
Fbxw2	0.011267	-0.0740549	0.067	0.049	1
Iars	0.223925	-0.0740443	0.025	0.02	1
Nme6	0.602662	-0.0739555	0.028	0.025	1
Lgals8	4.29e-05	-0.0739329	0.19	0.139	0.970683
Foxj2	0.246888	-0.0739268	0.051	0.043	1
Usp5	1e-05	-0.0738447	0.14	0.095	0.226429
Igf1	0.0226967	-0.0737936	0.016	0.025	1
Utp20	0.653213	-0.0737876	0.023	0.021	1
Ergic1	0.0488772	-0.0737714	0.061	0.047	1
Fbxl12	0.426596	-0.0737643	0.011	0.014	1
Rundc1	0.0151946	-0.0737249	0.038	0.026	1
Thap12	0.722313	-0.0736796	0.022	0.021	1
Snd1	0.000123281	-0.0736659	0.123	0.086	1
Chchd1	0.000992612	-0.073535	0.15	0.112	1
Atp5g2	0.0204407	-0.0735017	0.428	0.365	1
Wtap	0.00341503	-0.073391	0.1	0.074	1
Mybbp1a	0.000129751	-0.0733427	0.08	0.052	1
Spg7	0.0767499	-0.0733273	0.117	0.098	1
Gatd1	0.0343223	-0.0733262	0.075	0.059	1
Nabp2	0.0839531	-0.0733249	0.073	0.06	1
Mast4	0.41888	-0.0732995	0.011	0.014	1
Ptpn9	0.0461412	-0.0732246	0.036	0.026	1
Prr5l	0.479978	-0.0730692	0.062	0.056	1
Mark3	0.00366365	-0.0730618	0.082	0.06	1
Sipa1l3	0.0698507	-0.0729832	0.047	0.036	1
Rrp9	0.798305	-0.0728072	0.031	0.029	1
Dgke	0.695123	-0.0727857	0.015	0.014	1
Snap29	0.00118556	-0.072772	0.103	0.074	1
Smarcc2	0.0388434	-0.0726916	0.095	0.076	1
Slc9a6	0.0905296	-0.0726589	0.035	0.026	1
Med16	0.0180191	-0.0726337	0.049	0.035	1
Acsl5	0.000118387	-0.0725618	0.217	0.163	1
Ccdc90b	0.0071733	-0.0725043	0.047	0.032	1
Abtb1	0.446343	-0.0724872	0.033	0.029	1
Dlat	0.000622978	-0.0724348	0.072	0.048	1
Ddx49	0.356047	-0.0723724	0.051	0.045	1
Ptges3	5.62e-05	-0.0722662	0.222	0.167	1
Rnaseh2b	0.0018502	-0.0722182	0.069	0.047	1
Pira2	0.326039	-0.0721999	0.056	0.048	1
Irf8	0.872446	-0.0721536	0.499	0.476	1
Acat2	0.0169891	-0.0720507	0.005	0.011	1
Trp53i13	0.433318	-0.0720424	0.018	0.015	1
Eif3c	0.000996165	-0.0719437	0.312	0.25	1
Prpf39	0.00700294	-0.0718781	0.068	0.049	1
Hspa4	0.000157745	-0.071821	0.217	0.164	1
Fam78b	0.809485	-0.0718	0.014	0.013	1
Eci2	0.0037535	-0.071795	0.092	0.067	1
Ephx1	0.743819	-0.0717943	0.024	0.022	1
Tiprl	0.00845342	-0.0716654	0.079	0.059	1
Zpr1	0.00967158	-0.0716371	0.081	0.061	1
Stk4	0.0967452	-0.071407	0.085	0.07	1
Laptm4a	0.000641339	-0.0713265	0.314	0.252	1
Pip4k2a	0.0690165	-0.0712889	0.083	0.068	1
Mpc2	0.00189344	-0.0712835	0.177	0.137	1
Snx11	0.0382951	-0.0711897	0.045	0.034	1
Pdlim7	0.00446574	-0.071182	0.099	0.074	1
1700123O20Rik	1.97e-05	-0.0711245	0.08	0.049	0.444791
Inpp5a	0.266452	-0.0710571	0.034	0.028	1
Lrrk1	0.00106854	-0.0710449	0.112	0.081	1
Bud23	0.328161	-0.0710443	0.033	0.028	1
Wsb2	1.83e-05	-0.0709966	0.191	0.138	0.414573
Akr1c13	0.0198495	-0.070887	0.038	0.026	1
Srsf9	1.28e-05	-0.0708628	0.135	0.092	0.289205
Parn	0.919599	-0.0708003	0.025	0.024	1
Npepl1	0.000777726	-0.070624	0.093	0.064	1
Wbp4	0.0130307	-0.0705318	0.095	0.074	1
Smim11	0.00184326	-0.0705268	0.121	0.09	1
Wdfy2	0.0734909	-0.0704685	0.071	0.057	1
Nostrin	0.311148	-0.0704268	0.024	0.02	1
Pank3	0.105109	-0.0702837	0.074	0.061	1
Ggct	0.00350595	-0.0702733	0.133	0.102	1
Tnfrsf12a	0.697717	-0.0702436	0.016	0.017	1
Dna2	0.922914	-0.0700525	0.034	0.033	1
Znhit2	0.0669757	-0.0699745	0.06	0.047	1
Gcnt2	0.316921	-0.0699603	0.077	0.069	1
Rpp25l	0.027413	-0.0699187	0.078	0.06	1
Ranbp1	5.8e-05	-0.0698273	0.2	0.147	1
Eif1ad	0.154185	-0.0698008	0.082	0.069	1
Suds3	0.000191558	-0.0695134	0.107	0.074	1
Lsm2	0.0492914	-0.0693964	0.061	0.047	1
Ddost	0.00282122	-0.069342	0.212	0.169	1
Atp5h	0.0232262	-0.069337	0.502	0.433	1
Carhsp1	0.0217322	-0.0693355	0.044	0.032	1
Pnpt1	0.446414	-0.0693325	0.027	0.023	1
Tspan5	0.00538772	-0.0693009	0.065	0.046	1
Rpl36a-ps1	0.269975	-0.0692808	0.041	0.034	1
Stom	0.00248346	-0.0692432	0.154	0.119	1
Plin1	0.0197038	-0.069156	0.003	0.008	1
Zbtb10	0.0110407	-0.0691389	0.003	0.009	1
Gtf2f1	0.659493	-0.069118	0.063	0.059	1
Map2k2	1.31e-05	-0.069097	0.204	0.147	0.296842
Entr1	0.0297005	-0.0690277	0.11	0.088	1
Pi4k2a	4.4e-05	-0.0690162	0.218	0.161	0.994611
N6amt1	0.123788	-0.0689658	0.022	0.016	1
Ptgs1	0.0531915	-0.0689608	0.007	0.013	1
Chst15	0.404042	-0.0689102	0.014	0.012	1
Atp6ap1	0.0964625	-0.0688836	0.463	0.407	1
Flvcr2	0.00036565	-0.0688272	0.001	0.009	1
Pgam5	0.174212	-0.0687959	0.042	0.034	1
Pitpnb	0.000384285	-0.0687413	0.076	0.05	1
Pbx1	0.190959	-0.0687183	0.046	0.038	1
Nrp1	0.261153	-0.0686999	0.061	0.052	1
Cltb	0.0147205	-0.0686966	0.081	0.061	1
Itpk1	0.0582836	-0.068687	0.125	0.104	1
Gsk3a	0.000828208	-0.0686363	0.108	0.078	1
Aldh9a1	0.827007	-0.068571	0.024	0.023	1
Rbm45	0.0977711	-0.0685492	0.006	0.01	1
Apobec1	0.165431	-0.0685226	0.063	0.053	1
Snrpa1	0.0355326	-0.0685168	0.064	0.049	1
Dusp10	0.247738	-0.0684861	0.011	0.015	1
H2afy	0.021657	-0.0684633	0.261	0.219	1
Ormdl2	0.000636219	-0.0684397	0.109	0.077	1
Hadh	0.0369163	-0.0683841	0.069	0.054	1
Nsmce2	0.0356102	-0.0683363	0.047	0.035	1
Stard4	0.536851	-0.0683122	0.026	0.028	1
Prdx3	0.049323	-0.0683075	0.055	0.042	1
Ola1	0.000564238	-0.0682657	0.1	0.07	1
Alkbh1	0.0377603	-0.0682066	0.045	0.033	1
Srsf2	0.0249452	-0.0681879	0.254	0.216	1
Zbtb17	0.0508934	-0.0681757	0.05	0.038	1
Samm50	0.00349519	-0.0681005	0.196	0.154	1
Ctns	0.289342	-0.0680918	0.028	0.023	1
Prkaca	0.0250442	-0.0680825	0.045	0.033	1
Nsun3	0.627143	-0.0680224	0.014	0.012	1
Stk10	0.0438916	-0.0679537	0.062	0.048	1
B4galt7	0.0492078	-0.0679364	0.044	0.033	1
Polr2m	0.000498784	-0.0679092	0.11	0.079	1
Mcm3	0.0522145	-0.0678884	0.045	0.034	1
Sgk3	0.218839	-0.0678228	0.056	0.047	1
Nelfcd	0.721011	-0.0678172	0.024	0.022	1
Fam160b2	0.661387	-0.0677961	0.053	0.049	1
Tmem245	0.346651	-0.0676783	0.047	0.041	1
Rnpep	0.005268	-0.0676506	0.206	0.167	1
Tmem106c	0.419608	-0.0675791	0.041	0.036	1
Git2	0.0708022	-0.0675281	0.086	0.071	1
Rassf4	0.000154724	-0.0675171	0.22	0.166	1
Il15	0.398791	-0.0674677	0.021	0.018	1
Rps18	0.0186968	-0.0674328	0.455	0.399	1
Rpa2	0.110394	-0.0669938	0.047	0.037	1
Sbk2	0.749411	-0.0669774	0.017	0.016	1
Ift22	0.272746	-0.0669695	0.046	0.039	1
Atpaf2	0.00257531	-0.0669553	0.042	0.026	1
Fam126a	0.955192	-0.066871	0.033	0.033	1
Ube3b	0.00560837	-0.0668444	0.071	0.051	1
Nudcd3	0.00105	-0.0668386	0.1	0.072	1
Znhit1	0.0127691	-0.0668367	0.263	0.218	1
Rtl8a	0.655363	-0.0668348	0.012	0.011	1
Fry	0.352845	-0.066817	0.024	0.02	1
Senp1	0.00076974	-0.0668051	0.049	0.03	1
Cped1	0.875876	-0.0667751	0.013	0.013	1
Dctn5	0.00145543	-0.066705	0.089	0.063	1
Alg1	0.000596216	-0.0666794	0.078	0.052	1
Mindy1	0.189226	-0.0666266	0.064	0.054	1
Rhbdd2	0.675894	-0.0666075	0.022	0.02	1
Cpsf3	0.0100761	-0.0665691	0.07	0.051	1
Fam13b	0.361014	-0.0664743	0.044	0.038	1
Kazald1	0.156258	-0.0664194	0.009	0.013	1
Adcy7	0.000564297	-0.0664154	0.082	0.055	1
Psmc1	0.00272917	-0.0663229	0.135	0.103	1
Erg28	0.00898826	-0.0662704	0.073	0.053	1
Gsk3b	0.00103116	-0.0662527	0.172	0.132	1
Rnf8	0.704466	-0.0662491	0.049	0.046	1
Dus1l	0.0165943	-0.0662023	0.041	0.028	1
Xaf1	0.00110581	-0.0661843	0.103	0.074	1
Cpped1	0.0290406	-0.0661768	0.047	0.034	1
Bin2	0.151547	-0.0661214	0.063	0.052	1
Gpr55	0.24293	-0.0661187	0.012	0.016	1
Mecr	0.808656	-0.0660891	0.02	0.019	1
Tbl1xr1	0.0567709	-0.066075	0.116	0.096	1
Rcbtb2	0.0289386	-0.0660062	0.093	0.073	1
Mbtps2	0.167068	-0.0659959	0.034	0.027	1
Rbms2	0.145755	-0.0659585	0.041	0.033	1
Commd2	0.00169101	-0.0657593	0.072	0.049	1
Gar1	0.234785	-0.0657105	0.029	0.023	1
Ctla2a	0.37381	-0.0656396	0.006	0.004	1
Tmem39a	0.382123	-0.065583	0.018	0.015	1
Ssu72	3.04e-07	-0.0655603	0.248	0.176	0.00688487
Mlycd	0.142493	-0.0655077	0.056	0.046	1
Rbm17	0.000833658	-0.0654893	0.098	0.07	1
Gal	0.138033	-0.06546	0.007	0.01	1
Mrpl35	0.0643789	-0.0653135	0.065	0.051	1
Nars	0.00012246	-0.0652178	0.129	0.091	1
Hcfc2	0.904845	-0.0651892	0.012	0.012	1
Hps5	0.786732	-0.065174	0.026	0.025	1
Flcn	0.042025	-0.0651677	0.048	0.036	1
Retnla	0.250506	-0.0651529	0.001	0.002	1
Zbtb2	0.635556	-0.0650348	0.015	0.013	1
Slc49a4	0.0193508	-0.0650023	0.087	0.068	1
Ube2q1	2.41e-05	-0.0649913	0.157	0.111	0.544757
Stk17b	0.0532033	-0.0649462	0.102	0.084	1
Xrn2	1.23e-05	-0.0649013	0.108	0.07	0.278982
Sdad1	0.00921344	-0.0648716	0.043	0.029	1
Ahsa1	1.36e-06	-0.0648495	0.189	0.131	0.0308409
Casc3	0.47361	-0.0648055	0.051	0.047	1
Clec12a	0.00140078	-0.0647463	0.403	0.333	1
Ndfip1	7.18e-06	-0.0646145	0.225	0.164	0.162462
Pop7	0.0126469	-0.0645973	0.079	0.06	1
Arhgdib	0.00744224	-0.0645807	0.477	0.402	1
Lrrc14	0.480785	-0.0645258	0.038	0.034	1
Mrps2	0.253707	-0.0644877	0.023	0.018	1
Rps4x	0.756228	-0.0644842	0.658	0.616	1
Eepd1	0.218171	-0.0644155	0.053	0.045	1
Rgs2	0.335462	-0.0643267	0.258	0.24	1
Rbm7	0.00050226	-0.0643024	0.186	0.141	1
Uqcrq	0.0189969	-0.0642624	0.492	0.425	1
Stk35	0.0429834	-0.0642038	0.03	0.021	1
Ighm	0.504293	-0.0641227	0.003	0.004	1
Pin1	0.00145186	-0.0639117	0.117	0.086	1
Sco2	0.0582224	-0.0638749	0.049	0.037	1
Ppp6r1	0.00367965	-0.0638528	0.1	0.075	1
Mettl1	0.277021	-0.0637469	0.045	0.039	1
Isoc1	0.000296061	-0.0635828	0.204	0.155	1
Rbms3	0.684688	-0.0635768	0.014	0.013	1
Vezf1	0.255958	-0.0635636	0.028	0.023	1
Cc2d1b	0.103021	-0.0635615	0.087	0.074	1
Mtmr4	0.46183	-0.0635266	0.016	0.013	1
Rpl9-ps6	0.00136421	-0.0635027	0.123	0.091	1
Dnajc14	0.00575904	-0.0634499	0.098	0.074	1
Ndufb9	0.00130426	-0.0634129	0.345	0.283	1
1190005I06Rik	0.496929	-0.0633664	0.017	0.014	1
Zfand2b	0.0331574	-0.0633573	0.046	0.034	1
Esyt2	0.000103534	-0.0633432	0.139	0.099	1
Rel	0.259466	-0.0633249	0.169	0.153	1
Rpusd3	0.296027	-0.0632196	0.009	0.012	1
Arhgap5	0.00701639	-0.0632035	0.073	0.053	1
Heatr3	0.128549	-0.0632005	0.03	0.023	1
Lta4h	0.106368	-0.0631944	0.057	0.046	1
Txlna	0.0893224	-0.0631147	0.056	0.044	1
C1galt1	3.34e-05	-0.0631063	0.105	0.069	0.754673
Ino80e	0.00170892	-0.0630672	0.058	0.038	1
Ptcd2	0.512823	-0.0630423	0.05	0.045	1
Snx7	0.000337079	-0.0630328	0.073	0.048	1
Ppcs	0.148287	-0.0630216	0.028	0.021	1
Fabp1	0.125754	-0.0629921	0.005	0.009	1
Wdr5	0.00615377	-0.0629199	0.048	0.032	1
Ccnk	0.0667568	-0.0629133	0.053	0.041	1
Tgfbr2	1.86e-05	-0.062752	0.135	0.091	0.420956
Ppa2	0.0184821	-0.0627399	0.045	0.032	1
Fech	0.0629437	-0.0626609	0.043	0.033	1
Rbm34	0.0871452	-0.0626442	0.053	0.042	1
Sf3a3	0.0137618	-0.0626377	0.082	0.062	1
Ap5z1	0.0203464	-0.0626103	0.057	0.042	1
Tmub1	0.0543594	-0.0625832	0.051	0.039	1
Mlec	1.9e-05	-0.0625333	0.169	0.12	0.429021
Ppp1r9b	0.0198498	-0.0625262	0.167	0.138	1
B4galt1	0.00875509	-0.062486	0.215	0.176	1
Taf6l	0.348691	-0.0624475	0.029	0.024	1
Pde3b	0.000220953	-0.0624259	0.051	0.03	1
Cfap36	0.301193	-0.0623347	0.042	0.035	1
Ppp3r1	0.00128911	-0.0622173	0.16	0.122	1
Ero1lb	0.01777	-0.0621372	0.061	0.045	1
Rem1	0.000708657	-0.0620594	0	0.007	1
Lsmem1	0.711199	-0.0620345	0.031	0.029	1
Rbm33	0.00130353	-0.0620283	0.058	0.038	1
Anxa3	0.00127155	-0.0620249	0.115	0.084	1
Lrg1	0.623838	-0.062012	0.014	0.012	1
Ccni	0.00129994	-0.0619396	0.138	0.104	1
Mrps18a	5.52e-05	-0.061915	0.116	0.079	1
Map3k20	0.0150756	-0.0618908	0.041	0.028	1
Ube2w	0.0272323	-0.0618479	0.068	0.052	1
Wdr7	0.003907	-0.0618318	0.043	0.028	1
Rps5	0.336824	-0.061819	0.624	0.585	1
Acadl	9.46e-05	-0.0618162	0.17	0.125	1
Synj2bp	0.000387934	-0.0617433	0.092	0.063	1
Pigs	0.000181038	-0.061736	0.126	0.089	1
Borcs8	0.000179765	-0.0617121	0.072	0.046	1
Bcl2l12	0.419155	-0.0616151	0.018	0.021	1
Map7d1	1.27e-06	-0.0615875	0.264	0.192	0.0288471
Cpne3	9.35e-06	-0.0615467	0.145	0.099	0.211441
1700037C18Rik	0.314317	-0.0614601	0.014	0.01	1
Rnf167	0.866309	-0.0614146	0.03	0.029	1
Rab3gap1	0.00823779	-0.061409	0.06	0.043	1
Spink2	0.248123	-0.0612463	0.05	0.042	1
Slc25a36	5.86e-05	-0.0612096	0.077	0.048	1
Atp6v1b2	0.0691878	-0.0612067	0.467	0.405	1
Ap3m1	0.0862788	-0.0611969	0.059	0.047	1
Hs1bp3	0.419272	-0.0611213	0.044	0.039	1
C2cd2	0.522296	-0.0610948	0.012	0.014	1
Prkra	0.442362	-0.0610853	0.036	0.031	1
Oxct1	0.00932504	-0.061078	0.175	0.141	1
Dnajb2	0.629465	-0.0609729	0.026	0.023	1
Cyb561	0.15777	-0.0608576	0.036	0.028	1
Lin52	0.748573	-0.0608461	0.009	0.008	1
Sec22b	0.0354604	-0.0607707	0.096	0.077	1
Ppp1r2	5.98e-05	-0.0607563	0.111	0.075	1
Pphln1	0.000436312	-0.0607277	0.068	0.044	1
Gas2l1	1.6e-05	-0.060679	0.077	0.046	0.360947
Marveld1	0.000559503	-0.0605751	0.052	0.032	1
Ppm1g	0.000618091	-0.0605674	0.08	0.054	1
Dnajc7	0.0303298	-0.0604282	0.133	0.109	1
Sf3a2	0.347369	-0.0604224	0.027	0.023	1
Swi5	0.000119818	-0.060397	0.333	0.264	1
Eif3a	0.000706981	-0.0603346	0.407	0.333	1
Vps52	0.00452913	-0.060333	0.054	0.036	1
Psmd10	0.00111424	-0.0603005	0.186	0.144	1
Ythdf1	0.00278332	-0.0602292	0.08	0.057	1
Acox1	0.000258293	-0.0601715	0.101	0.07	1
Fam43a	0.413844	-0.0601214	0.006	0.007	1
1110059E24Rik	0.724481	-0.0600947	0.032	0.03	1
Eif2b4	0.165051	-0.0600859	0.057	0.047	1
Gart	0.0107801	-0.0600414	0.07	0.051	1
Tardbp	0.0141641	-0.059961	0.152	0.124	1
2310033P09Rik	8.52e-05	-0.059929	0.058	0.034	1
Tusc2	0.0240928	-0.0599096	0.05	0.036	1
Tnrc18	0.220144	-0.0598939	0.075	0.065	1
Med24	0.88971	-0.059882	0.016	0.015	1
Mbnl3	0.921728	-0.0597713	0.012	0.012	1
Plxdc2	1.25e-05	-0.0597527	0.101	0.063	0.282684
Sfpq	0.0115297	-0.0597393	0.307	0.259	1
Slc35b1	2.97e-05	-0.0597224	0.113	0.075	0.670986
Nup50	0.00883376	-0.0595813	0.076	0.057	1
Aopep	0.0374279	-0.0595311	0.111	0.09	1
Ncoa1	0.167741	-0.0594492	0.064	0.053	1
Plcb1	0.416198	-0.0593855	0.018	0.021	1
Smad4	0.124942	-0.0593721	0.039	0.031	1
Hyou1	0.00721598	-0.0593286	0.065	0.046	1
Klrb1b	0.000179554	-0.0593227	0.116	0.081	1
Ccnb1ip1	0.319063	-0.0592606	0.014	0.018	1
Cpt1a	0.000363558	-0.0592397	0.121	0.087	1
Smim15	0.00361613	-0.0591283	0.066	0.047	1
Ccdc34	0.0106733	-0.0590059	0.061	0.044	1
Plaat3	0.0837389	-0.0589336	0.399	0.356	1
Gsto1	6.58e-05	-0.0588995	0.112	0.076	1
Ormdl1	0.14498	-0.058877	0.035	0.028	1
Gabarap	0.206142	-0.0588298	0.615	0.554	1
Il13ra1	3.15e-06	-0.0588207	0.18	0.125	0.0713475
Prpf18	0.0824858	-0.0588104	0.049	0.038	1
Nck1	1.3e-05	-0.0587734	0.128	0.087	0.293658
Atpsckmt	0.0342397	-0.0586349	0.045	0.033	1
Tmem11	0.160416	-0.0585977	0.069	0.058	1
Rlim	0.0087234	-0.0585241	0.092	0.07	1
Rab3il1	0.151913	-0.0585199	0.019	0.025	1
Gm8369	0.123058	-0.0584747	0.001	0.003	1
Il20rb	0.670994	-0.0584614	0.021	0.019	1
Adgrl3	0.296571	-0.058457	0.005	0.007	1
Vcp	0.00304879	-0.0584103	0.428	0.357	1
Cnot1	0.000170453	-0.0583969	0.126	0.09	1
Ubxn1	4.63e-05	-0.0583093	0.342	0.268	1
Thumpd3	0.643859	-0.0582985	0.035	0.032	1
Skp1a	0.0725955	-0.0582961	0.087	0.071	1
Tor3a	5.93e-06	-0.0582657	0.234	0.169	0.134094
Snx30	0.0638834	-0.0582597	0.062	0.049	1
Czib	0.0150683	-0.0582271	0.052	0.037	1
Cpsf2	0.00191879	-0.058179	0.073	0.051	1
Map4k2	0.565744	-0.058127	0.017	0.019	1
Cd22	3.5e-05	-0.0581186	0.107	0.07	0.791096
Peli1	0.00671695	-0.0581082	0.103	0.079	1
Nenf	2.34e-07	-0.0580797	0.189	0.128	0.00528403
Vdac3	5.08e-07	-0.0578719	0.159	0.106	0.0115044
Tstd3	0.757077	-0.0578543	0.013	0.014	1
Cetn2	0.000263811	-0.0577775	0.066	0.042	1
Slc7a5	0.307028	-0.0577642	0.008	0.011	1
Bcl7c	1.33e-05	-0.0577012	0.102	0.066	0.300538
Atox1	0.0505334	-0.0576746	0.52	0.462	1
Mfsd14a	0.000942314	-0.0575569	0.055	0.035	1
Thoc5	0.0959485	-0.0574808	0.038	0.029	1
Tcea1	2.56e-05	-0.0573756	0.188	0.135	0.579692
Dock5	0.000239441	-0.0573196	0.09	0.061	1
Pno1	0.521116	-0.0572984	0.043	0.038	1
Nosip	0.189854	-0.0572919	0.051	0.043	1
Mlst8	0.436798	-0.0572738	0.017	0.02	1
Rps28	0.855416	-0.0572142	0.729	0.686	1
Rgmb	0.145688	-0.05711	0.04	0.032	1
Ubxn2a	0.000218077	-0.0570683	0.067	0.042	1
Atp1b3	8.79e-06	-0.057065	0.385	0.3	0.198935
Gm15013	0.468563	-0.0570273	0.023	0.02	1
Mrpl42	0.00135377	-0.0570162	0.091	0.065	1
Cstf2	0.53585	-0.0569958	0.016	0.014	1
Grap2	0.0459788	-0.0569618	0.003	0.007	1
Tbrg4	0.287694	-0.0569362	0.033	0.027	1
Qpct	0.0124985	-0.0568807	0.064	0.047	1
Slc31a2	3.28e-05	-0.0568463	0.298	0.229	0.741944
1700037H04Rik	0.0552927	-0.0568007	0.029	0.021	1
Slirp	6.72e-05	-0.0567746	0.165	0.118	1
Mrpl21	0.00037075	-0.0566033	0.103	0.072	1
Abcd4	0.0322939	-0.0565121	0.048	0.035	1
Hacd2	0.25034	-0.056468	0.032	0.026	1
Rpf2	0.895859	-0.0564588	0.026	0.025	1
Dctn2	2.84e-05	-0.0563895	0.174	0.125	0.643447
Tmem151a	0.0320586	-0.0562301	0.032	0.022	1
Ccdc191	0.789727	-0.0562152	0.019	0.018	1
Atg4a	0.0563809	-0.0561935	0.034	0.025	1
Fam89a	0.226056	-0.056189	0.023	0.018	1
Snx4	0.0026992	-0.0561294	0.08	0.057	1
Rims3	0.196145	-0.056065	0.005	0.008	1
Cd101	0.489217	-0.056063	0.012	0.014	1
Gkap1	0.057733	-0.0560195	0.029	0.021	1
Tmem160	0.00578452	-0.0559403	0.383	0.32	1
Slc7a6	0.690173	-0.0559014	0.008	0.009	1
Bpnt1	0.144286	-0.0558491	0.018	0.013	1
Mapk1ip1l	0.000804315	-0.0558095	0.165	0.125	1
Hdac3	0.0275761	-0.0557772	0.036	0.025	1
Prpf31	0.0130753	-0.0557401	0.082	0.062	1
Slc35a1	0.0440095	-0.0557105	0.03	0.021	1
Arhgef18	0.807788	-0.0556809	0.014	0.013	1
Phax	0.0111265	-0.05563	0.068	0.05	1
Pdk3	0.00398244	-0.055621	0.05	0.033	1
Zfp212	0.468346	-0.0556031	0.017	0.015	1
Sdhaf4	0.000119181	-0.0554973	0.093	0.062	1
Hbs1l	0.0150459	-0.0554771	0.059	0.043	1
Mrps11	0.0012187	-0.0554345	0.041	0.025	1
Arpp19	0.00110236	-0.0553728	0.319	0.259	1
Timm9	0.0153358	-0.0553379	0.029	0.019	1
Vac14	0.00307143	-0.0552835	0.065	0.045	1
1810037I17Rik	0.0165931	-0.0552301	0.533	0.461	1
Pomgnt1	0.331351	-0.0552187	0.025	0.02	1
Nipsnap2	0.0501338	-0.0551897	0.04	0.029	1
Prrc1	0.000932421	-0.055127	0.064	0.042	1
Phb2	5.68e-06	-0.0549843	0.214	0.154	0.128587
Nmd3	0.030148	-0.054948	0.037	0.026	1
Nlk	0.160832	-0.0549323	0.03	0.024	1
Htra2	2.5e-06	-0.0549148	0.157	0.107	0.0565504
Exosc8	0.0047528	-0.0549011	0.044	0.029	1
Psmb7	0.000385802	-0.0548477	0.238	0.184	1
Mrps33	1.41e-05	-0.0548207	0.246	0.182	0.319478
Ntmt1	0.00501561	-0.0547863	0.036	0.022	1
Psmb1	0.00138934	-0.0547519	0.371	0.304	1
Stard7	0.0215994	-0.0547418	0.046	0.033	1
Serinc3	7.25e-05	-0.0547238	0.307	0.237	1
Phb	0.0103531	-0.0547133	0.095	0.073	1
Tom1	0.0497345	-0.0546963	0.062	0.048	1
Pes1	0.224171	-0.0546859	0.056	0.047	1
Fam219a	0.00187733	-0.0546602	0.057	0.037	1
Smad1	5.13e-05	-0.0546268	0.088	0.057	1
Afap1	0.517847	-0.0545794	0.024	0.026	1
Mtpn	0.000978741	-0.0545674	0.37	0.304	1
Tspo	0.962432	-0.0544951	0.67	0.632	1
Smarca2	0.267402	-0.0544824	0.041	0.035	1
Rnf145	0.00335559	-0.0544424	0.056	0.038	1
Tmem141	0.00915927	-0.0544391	0.053	0.037	1
Sorbs3	0.579295	-0.0544367	0.011	0.012	1
Nln	0.00065667	-0.0543885	0.087	0.06	1
Spr	0.000533076	-0.0543873	0.089	0.061	1
Alg5	0.00379462	-0.0543781	0.075	0.053	1
Jmjd7	0.206542	-0.0543278	0.005	0.007	1
Decr1	0.0105122	-0.0542044	0.051	0.035	1
Gba	0.00109814	-0.0541488	0.139	0.104	1
Sh3tc1	1.12e-06	-0.0541105	0.147	0.097	0.0253246
Aatk	0.20124	-0.0540391	0.033	0.026	1
Hsd17b11	0.000114267	-0.0540268	0.17	0.125	1
Set	0.000237863	-0.053818	0.254	0.197	1
Wrap53	0.946942	-0.0537751	0.013	0.012	1
Trib1	0.427574	-0.0537577	0.244	0.228	1
Rpn2	0.000100746	-0.0537452	0.352	0.278	1
Atp10a	0.748263	-0.0536966	0.014	0.015	1
Kbtbd2	0.0319213	-0.0534763	0.029	0.019	1
Tnfsf10	0.581083	-0.0534595	0.011	0.012	1
Slc25a4	8.59e-06	-0.0534431	0.208	0.15	0.19438
Ufc1	0.000243323	-0.0534194	0.166	0.122	1
P2ry10b	0.644838	-0.0534188	0.045	0.042	1
Trmt5	0.943825	-0.0533587	0.007	0.007	1
Psph	0.755376	-0.0533556	0.013	0.014	1
Tsta3	0.00239631	-0.053276	0.083	0.059	1
Smc1a	1.11e-05	-0.0532444	0.112	0.073	0.250088
Adam33	0.883565	-0.0532169	0.012	0.012	1
Gm49336	0.00356425	-0.0532	0.064	0.044	1
Pabpc4	0.00227036	-0.0531057	0.051	0.033	1
Mrps35	0.01408	-0.053058	0.058	0.042	1
Heca	0.00121788	-0.0529423	0.054	0.034	1
Sdhb	0.000434662	-0.0529322	0.251	0.196	1
Usp4	0.00318339	-0.052917	0.102	0.076	1
Mogs	3.23e-05	-0.0528106	0.088	0.056	0.730325
Rnh1	0.00521517	-0.0527321	0.349	0.291	1
Scaf4	0.83784	-0.0527197	0.036	0.034	1
Spef1	0.405655	-0.0527188	0.009	0.012	1
Pxmp4	0.540696	-0.052664	0.031	0.028	1
Bdh1	0.205223	-0.052618	0.005	0.007	1
Hp1bp3	1.24e-07	-0.0525519	0.164	0.107	0.00280857
Trip12	0.000362101	-0.0524886	0.221	0.171	1
Nono	0.000241568	-0.0524882	0.179	0.134	1
Mov10	0.000157557	-0.0524426	0.064	0.04	1
Eif2ak2	4.44e-06	-0.0524227	0.099	0.062	0.100474
Borcs5	0.254602	-0.0524048	0.025	0.02	1
Eif2b5	0.00135992	-0.0523894	0.067	0.046	1
Dync1li2	0.00936386	-0.0523436	0.06	0.043	1
LTO1	0.030818	-0.0522193	0.032	0.022	1
Midn	0.128802	-0.0522114	0.058	0.048	1
Ddx31	0.0375302	-0.0522114	0.032	0.022	1
Trmt1	0.0036503	-0.0521811	0.056	0.038	1
Idnk	1.92e-05	-0.052166	0.234	0.173	0.43524
Kctd13	0.547027	-0.0520683	0.015	0.013	1
Slc25a51	0.0162518	-0.0520554	0.062	0.046	1
B3gat3	0.00040646	-0.0520375	0.128	0.093	1
Clta	0.0205178	-0.0519357	0.48	0.421	1
Ddhd2	0.103152	-0.0519231	0.054	0.043	1
Clec4a3	0.164586	-0.0517809	0.065	0.055	1
Elovl1	0.000156408	-0.0517563	0.155	0.113	1
Acot7	0.00135034	-0.0517108	0.055	0.036	1
Acyp1	0.260205	-0.0516713	0.017	0.013	1
Prickle2	0.81041	-0.0515527	0.01	0.01	1
Cdk17	0.00131654	-0.0515506	0.048	0.03	1
Endov	0.782957	-0.0515211	0.008	0.009	1
Dip2b	0.0123539	-0.0514807	0.057	0.041	1
Golim4	0.245154	-0.0514703	0.029	0.023	1
Rcan3	0.578427	-0.0513969	0.033	0.03	1
Pgap2	4.55e-07	-0.0513667	0.17	0.113	0.010291
Ube2h	0.000423266	-0.0513609	0.108	0.076	1
Golga7	4.42e-07	-0.0513303	0.15	0.097	0.0099916
Scap	0.49023	-0.0513173	0.057	0.051	1
Bbip1	8.46e-07	-0.051286	0.116	0.073	0.0191512
Cdpf1	0.00374885	-0.0512751	0.04	0.025	1
Lman2	2.16e-05	-0.0512747	0.289	0.218	0.48941
Odf2	0.605589	-0.0511408	0.047	0.044	1
Krr1	0.130664	-0.0511021	0.049	0.039	1
Dnaja2	1.11e-05	-0.0510368	0.184	0.132	0.250123
Soga1	0.569136	-0.0510083	0.021	0.018	1
Lmbr1l	0.389915	-0.0509977	0.024	0.02	1
Fbxl17	0.101767	-0.0509855	0.044	0.035	1
Surf1	0.000734869	-0.0509749	0.061	0.04	1
Rnase4	0.43327	-0.0509734	0.015	0.018	1
Rbmx2	0.711853	-0.050943	0.016	0.015	1
Ccr7	0.91686	-0.050924	0.005	0.005	1
Mcm5	0.619239	-0.0509215	0.008	0.007	1
Med22	0.0165352	-0.0509059	0.041	0.028	1
Psmc2	0.00134209	-0.0507781	0.107	0.077	1
Fam53b	0.0665382	-0.0507741	0.065	0.052	1
Npm1	0.00676498	-0.0507555	0.431	0.368	1
Kmt5c	0.0934302	-0.0507498	0.052	0.041	1
Gsr	0.00444696	-0.0507444	0.361	0.303	1
[truncated: 20,629 more rows]
