# Supplementary material for: CD38+ Alveolar macrophages mediate early control of M. tuberculosis proliferation in the lung
Source: Research Square preprint supplement (doi:10.21203/rs.3.rs-3934768/v1), 2024-07-15
Supplement: Supplementary file 3 [file 36958e7499bd7ab7de3a0ae2.xlsx]

## Sheet: module2_blue
	Module 2 Genes - Upregulated in BCG infected macs
											genes involved in lysosomal function and trafficking, phagocytic and autophagy functions as well as Rab GTPases are highlighted in purple.
	Membership	p.val
Lrmda	0.930315	0
Slc8a1	0.823114	0
Camk1d	0.80672	0
Fmnl2	0.802683	0
Trps1	0.801886	0
Cmss1	0.796457	0
Cmip	0.757864	0
Mitf	0.756758	0
Osbpl8	0.745951	0
Cdk8	0.745872	0
Gphn	0.737098	0
Atrnl1	0.733461	0
Ldlrad4	0.733315	0
Abca1	0.728374	0
Cers6	0.725114	0
Etv6	0.721796	0
Pid1	0.718221	0
Kpna1	0.701231	0
Il31ra	0.693773	0
Gnaq	0.692504	0
Fbxl5	0.689007	0
Nos2	0.687363	0
Phlpp1	0.6868	0
Traf3	0.683863	0
Dennd1a	0.672067	0
Ext1	0.670636	0
Myo1e	0.667411	0
Akt3	0.662039	0
Acsl1	0.658656	0
Lpp	0.657225	0
Zfand3	0.655408	0
Abtb2	0.653865	0
Fbxl17	0.648977	0
Zswim6	0.647704	0
Ptprj	0.633872	0
Aff1	0.632309	0
Gm20388	0.618672	0
Fnip2	0.616963	0
Fndc3b	0.613232	0
Exoc4	0.610862	0
Arhgap24	0.608936	0
Lrch1	0.607928	0
Abi1	0.604569	0
Slc7a2	0.603728	0
Zeb2	0.603358	0
Tbc1d5	0.599375	0
Man2a1	0.597224	0
Maml2	0.596906	0
Pde7b	0.595541	0
Rapgef2	0.5934	5.92878775009496e-323
Rere	0.593219	1.08694442085074e-322
Tns3	0.593012	2.17388884170148e-322
Aoah	0.592795	4.15015142506647e-322
Cacna1d	0.582924	0.00E+00
Arhgap10	0.57682	4.06E-301
Gng12	0.576371	1.52E-300
Lrrc8c	0.575665	1.21E-299
March1	0.57404	1.39E-297
Rnf149	0.570301	7.00E-293
Smyd3	0.569667	4.33E-292
Gm26992	0.569585	5.47E-292
Snd1	0.568839	4.64E-291
Fars2	0.567837	8.11E-290
Rreb1	0.566263	7.14E-288
Hexb	0.56606	1.27E-287
Plcl2	0.56413	2.97E-285
Cd86	0.564105	3.18E-285
Hdac9	0.559957	3.46E-280
Creb5	0.558053	6.71E-278
Rab8b	0.551932	1.21E-270
Slco3a1	0.551835	1.57E-270
Plek	0.548153	3.08E-266
Sestd1	0.546755	1.27E-264
Atg10	0.545661	2.30E-263
Lrrk2	0.544852	1.95E-262
Arid1b	0.543866	2.62E-261
Tank	0.541469	1.39E-258
Zfp407	0.540297	2.94E-257
Sash1	0.539456	2.60E-256
Slc1a2	0.537986	1.16E-254
Vav3	0.537502	4.03E-254
Ell2	0.537133	1.04E-253
Rasgef1b	0.53672	3.00E-253
Htr7	0.53533	1.05E-251
Arg2	0.534045	2.78E-250
Sik3	0.532146	3.43E-248
Parp8	0.53191	6.23E-248
Nfe2l2	0.531006	6.08E-247
Tmem164	0.528322	5.07E-244
Slx4ip	0.526966	1.48E-242
Btbd9	0.52346	8.48E-239
Irak2	0.521412	1.27E-236
Phf21a	0.518656	1.02E-233
Man1a	0.518129	3.63E-233
Taco1	0.51297	8.23E-228
App	0.512183	5.30E-227
Clmp	0.511972	8.74E-227
Pla2g4a	0.511925	9.74E-227
Osbpl3	0.511876	1.10E-226
St3gal1	0.509226	5.55E-224
Rbm47	0.507601	2.46E-222
Antxr2	0.506133	7.44E-221
Atxn7l1	0.506128	7.54E-221
Diaph2	0.505247	5.77E-220
Wwox	0.504901	1.28E-219
Jarid2	0.504262	5.60E-219
Sgms2	0.501397	3.97E-216
Saa3	0.50139	4.03E-216
Rftn1	0.499348	4.17E-214
Pla2g7	0.497223	5.05E-212
Clec4d	0.495896	9.89E-211
Asap1	0.495209	4.60E-210
Pdpn	0.4928	9.77E-208
Vti1a	0.490589	1.29E-205
Ambra1	0.489229	2.54E-204
Ly6i	0.483919	2.57E-199
Mctp1	0.480031	1.05E-195
Fnip1	0.479683	2.19E-195
Bcas3	0.479205	6.03E-195
Slc7a11	0.477135	4.76E-193
Lrrc8d	0.473538	8.78E-190
Rabgef1	0.471468	6.39E-188
Apba1	0.469986	1.35E-186
Uvrag	0.466503	1.65E-183
Pstpip2	0.464945	3.88E-182
Rffl	0.464591	7.93E-182
Hif1a	0.462675	3.74E-180
Mpp7	0.462288	8.11E-180
Large1	0.459493	2.12E-177
Cd38	0.451362	1.72E-170
Ppm1h	0.451293	1.97E-170
Rnf217	0.450832	4.79E-170
Clic4	0.44853	3.97E-168
Cyth1	0.448313	6.02E-168
Nedd4l	0.446942	8.20E-167
Tpd52	0.446175	3.52E-166
Fam102b	0.44461	6.80E-165
Jak2	0.442406	4.28E-163
Atp8b4	0.441255	3.68E-162
Gtdc1	0.441242	3.78E-162
P4ha1	0.440545	1.38E-161
Malt1	0.440297	2.20E-161
Vps13b	0.439992	3.87E-161
Cpeb4	0.438878	3.05E-160
Epb41l2	0.438481	6.36E-160
Cpq	0.437192	6.86E-159
Zcchc7	0.435031	3.61E-157
Slc23a2	0.434705	6.54E-157
Nrg1	0.434191	1.67E-156
Elmo1	0.432664	2.68E-155
Il1a	0.430999	5.44E-154
Dyrk1a	0.429153	1.50E-152
Dapk1	0.429086	1.69E-152
Alcam	0.428883	2.43E-152
Sdc1	0.428186	8.46E-152
Cblb	0.426896	8.43E-151
Ero1l	0.425181	1.76E-149
Fam172a	0.423101	6.87E-148
Cdyl2	0.422171	3.50E-147
Lyn	0.421816	6.51E-147
Mrtfa	0.42078	3.97E-146
Babam2	0.420333	8.64E-146
Arl15	0.419748	2.39E-145
Rybp	0.418939	9.70E-145
Lhfpl2	0.418251	3.19E-144
Carmil1	0.41811	4.06E-144
Cdkal1	0.417353	1.50E-143
Slc2a1	0.416504	6.44E-143
Ifrd1	0.414437	2.21E-141
B4galt5	0.414408	2.32E-141
Map4k4	0.41422	3.20E-141
Pde4b	0.414022	4.48E-141
Src	0.413972	4.88E-141
Slamf7	0.411967	1.46E-139
Mbd5	0.410833	9.90E-139
Adgb	0.410141	3.17E-138
Plekhm3	0.409413	1.07E-137
Fndc3a	0.407677	1.95E-136
Xylt1	0.407658	2.01E-136
F13a1	0.407472	2.75E-136
Spata5	0.406377	1.69E-135
Gbe1	0.402299	1.39E-132
Ern1	0.402209	1.61E-132
Mob3b	0.401708	3.66E-132
Sgpl1	0.39925	1.98E-130
Gas7	0.398116	1.24E-129
Rsrc1	0.397201	5.40E-129
Ap3b1	0.3972	5.41E-129
Fbxo11	0.396138	2.97E-128
Slc38a6	0.395294	1.15E-127
Srgap2	0.394596	3.48E-127
Fth1	0.394572	3.61E-127
Vegfa	0.394277	5.78E-127
Inhba	0.393608	1.67E-126
Bcl6	0.392602	8.24E-126
Nrp2	0.390633	1.83E-124
Pdlim5	0.387137	4.29E-122
Tmeff1	0.38696	5.65E-122
Clybl	0.380618	9.45E-118
Arih1	0.378886	1.30E-116
March3	0.378841	1.39E-116
Iqgap2	0.377554	9.60E-116
Foxp4	0.376834	2.83E-115
Myo5a	0.37551	2.04E-114
Cd274	0.375183	3.32E-114
Rhoq	0.37517	3.38E-114
Esr1	0.374112	1.63E-113
St3gal3	0.373858	2.37E-113
Gpd2	0.373737	2.84E-113
Mdfic	0.371758	5.25E-112
Foxo3	0.370779	2.21E-111
Nsmce2	0.367951	1.36E-109
Nxn	0.365099	8.34E-108
Tbc1d9	0.362756	2.38E-106
Ralgps1	0.359064	4.40E-104
Hsph1	0.3584	1.11E-103
Sh3kbp1	0.358073	1.76E-103
Stk3	0.35705	7.36E-103
Wdr7	0.356855	9.67E-103
Sod2	0.356152	2.57E-102
Lpcat2	0.353563	9.24E-101
Kansl1l	0.353262	1.40E-100
Srgn	0.352863	2.42E-100
Zfp516	0.348815	6.04E-98
Map4k3	0.348813	6.05E-98
Cpeb2	0.346747	9.82E-97
Ctss	0.346238	1.94E-96
Lrba	0.344671	1.58E-95
Kpna4	0.344361	2.39E-95
Rfx3	0.343074	1.32E-94
Tnfaip6	0.342587	2.52E-94
Snx29	0.342385	3.29E-94
Fmn1	0.341567	9.67E-94
Nos1ap	0.340197	5.86E-93
Lin54	0.340067	6.95E-93
Dram1	0.339197	2.17E-92
Atp11c	0.338929	3.08E-92
Nup98	0.338343	6.60E-92
Prdx6	0.336965	3.96E-91
Clec4e	0.335968	1.44E-90
Maml3	0.335253	3.61E-90
Exoc6b	0.334676	7.59E-90
Tnks	0.334057	1.68E-89
Zfhx3	0.332281	1.62E-88
Rai14	0.331052	7.74E-88
Smox	0.329739	4.07E-87
Tex2	0.327324	8.44E-86
Acvr2a	0.326938	1.37E-85
Pcdh7	0.325416	9.08E-85
Suco	0.324922	1.68E-84
Asmt	0.324594	2.51E-84
Mreg	0.324316	3.55E-84
Map2k4	0.322533	3.19E-83
Hdac8	0.322268	4.41E-83
Entpd1	0.321502	1.13E-82
Pten	0.320296	4.91E-82
Sipa1l1	0.318719	3.33E-81
Tec	0.317746	1.08E-80
Braf	0.316645	4.05E-80
Specc1l	0.315834	1.07E-79
Jak1	0.315647	1.34E-79
Epb41	0.314637	4.46E-79
Chst11	0.314141	8.05E-79
Fam20c	0.313775	1.24E-78
Orm1	0.313008	3.09E-78
Grina	0.312074	9.30E-78
Dock1	0.311585	1.65E-77
Ncoa2	0.311418	2.01E-77
Plekhg1	0.310742	4.45E-77
Tcf12	0.310568	5.46E-77
Ttc39c	0.309978	1.09E-76
D130040H23Rik	0.309824	1.31E-76
Mgat5	0.308857	4.03E-76
Zc3h12c	0.307941	1.17E-75
Immp2l	0.306446	6.59E-75
Ppard	0.304263	8.09E-74
Nfat5	0.302615	5.30E-73
Prdx5	0.302482	6.16E-73
Rcl1	0.3022	8.48E-73
Fam117b	0.301075	3.03E-72
Bnip3	0.300221	7.94E-72
Mthfd1l	0.300134	8.76E-72
AW554918	0.299872	1.17E-71
Procr	0.299785	1.30E-71
Acsl4	0.298675	4.50E-71
Pde8a	0.298547	5.19E-71
Ddhd1	0.297981	9.76E-71
Slc22a4	0.29761	1.48E-70
Itpr1	0.296675	4.17E-70
Exoc2	0.296654	4.27E-70
Cdyl	0.295352	1.81E-69
Mif	0.294868	3.08E-69
Med13	0.292919	2.61E-68
Slc16a10	0.292631	3.58E-68
Apobec1	0.290055	5.88E-67
Oasl1	0.289681	8.80E-67
Sfmbt1	0.289589	9.72E-67
Ly6c2	0.289491	1.08E-66
Met	0.288599	2.82E-66
Ric1	0.287805	6.61E-66
Tbc1d8	0.287746	7.04E-66
Fabp5	0.287388	1.03E-65
Ntng2	0.28713	1.36E-65
Lyrm4	0.284848	1.54E-64
Enox2	0.2848	1.62E-64
Lsmem1	0.284597	2.01E-64
P2ry14	0.283619	5.62E-64
Hivep1	0.282237	2.40E-63
Astn2	0.28218	2.55E-63
Clasp2	0.28188	3.48E-63
Adam9	0.280041	2.36E-62
Iqsec1	0.279916	2.69E-62
Peak1	0.279593	3.76E-62
Gpnmb	0.279532	4.00E-62
Zfp609	0.278852	8.09E-62
Camkmt	0.27848	1.19E-61
Itgav	0.278384	1.31E-61
Gramd1b	0.278326	1.39E-61
Supt3	0.277224	4.31E-61
Tmx4	0.277198	4.43E-61
Lmbrd1	0.276892	6.06E-61
C3	0.275995	1.51E-60
Spatc1	0.275832	1.79E-60
Arf4	0.275759	1.93E-60
Zfp654	0.272937	3.36E-59
Slc7a8	0.271142	2.03E-58
Psap	0.270147	5.47E-58
Ankrd44	0.266857	1.41E-56
Gclc	0.266693	1.66E-56
Gtf2f2	0.266032	3.17E-56
Mdm2	0.264809	1.04E-55
Nfkbiz	0.264794	1.06E-55
Zswim4	0.264049	2.18E-55
Frs2	0.263688	3.09E-55
Gm37240	0.263415	4.03E-55
Sh2b2	0.258113	6.39E-53
Aig1	0.257809	8.50E-53
Zhx2	0.257246	1.45E-52
Trpm2	0.257001	1.82E-52
Tlcd2	0.256084	4.30E-52
Tnip1	0.254662	1.62E-51
Tex14	0.254502	1.88E-51
Pag1	0.254038	2.89E-51
H2-M2	0.253382	5.31E-51
Rgcc	0.252425	1.29E-50
Jag1	0.252353	1.37E-50
Gls	0.251842	2.20E-50
Pik3r1	0.251595	2.76E-50
Lyst	0.251447	3.16E-50
Atxn1	0.250446	7.89E-50
Hk2	0.249166	2.53E-49
Cmklr1	0.248866	3.32E-49
Pld1	0.248848	3.37E-49
Snapc1l	0.247111	1.62E-48
Sdc4	0.24476	1.32E-47
Nlrp3	0.243833	3.02E-47
Spsb1	0.243763	3.21E-47
Tgfbr1	0.241691	1.99E-46
Stk38l	0.240579	5.27E-46
F10	0.240549	5.41E-46
Ptpn2	0.238977	2.12E-45
Sik2	0.23843	3.41E-45
Bcl2l11	0.237025	1.14E-44
Scfd2	0.236897	1.27E-44
Lcorl	0.236328	2.07E-44
Wac	0.234721	8.16E-44
Fpr3	0.233621	2.07E-43
Mxi1	0.232978	3.56E-43
Dst	0.232701	4.50E-43
Abcc5	0.232443	5.59E-43
Dennd4a	0.228827	1.14E-41
Disc1	0.228657	1.31E-41
Rps6ka5	0.22762	3.06E-41
Bbx	0.226947	5.32E-41
Ksr2	0.226919	5.44E-41
Fbxo34	0.22673	6.36E-41
Ahcyl2	0.226456	7.95E-41
Txnrd1	0.223831	6.68E-40
Rnf19b	0.223803	6.83E-40
Snx24	0.222006	2.89E-39
Svil	0.220843	7.29E-39
Cfb	0.219915	1.52E-38
Mgst1	0.218186	5.93E-38
Rap1gap2	0.216277	2.63E-37
Nars2	0.216257	2.67E-37
Gpr141	0.214579	9.77E-37
Egln3	0.213932	1.61E-36
Anpep	0.213842	1.72E-36
Cybb	0.213718	1.89E-36
Acpp	0.213474	2.28E-36
Lonrf3	0.212104	6.48E-36
Homer1	0.209994	3.19E-35
Arhgap22	0.209837	3.59E-35
Bckdhb	0.209716	3.94E-35
Kynu	0.208713	8.34E-35
Tmem170b	0.208144	1.28E-34
Rnf128	0.208129	1.29E-34
Gpr176	0.206698	3.73E-34
Nod2	0.206674	3.80E-34
Rbks	0.206214	5.33E-34
Gys1	0.206036	6.08E-34
Htra1	0.205693	7.82E-34
Ripk2	0.205169	1.15E-33
Myo3b	0.204655	1.68E-33
Olr1	0.204406	2.01E-33
Itgam	0.203536	3.79E-33
Lrp12	0.203359	4.31E-33
Dcstamp	0.202667	7.11E-33
Gch1	0.20211	1.06E-32
Phtf2	0.201177	2.08E-32
Agps	0.20103	2.31E-32
Cst7	0.200997	2.37E-32
Rapgef6	0.200937	2.47E-32
Traf6	0.200798	2.73E-32
Papss2	0.199744	5.80E-32
Sfmbt2	0.199386	7.48E-32
Irs2	0.19887	1.08E-31
Zbtb11	0.198585	1.32E-31
Ptgs2	0.198087	1.88E-31
Tma16	0.197772	2.35E-31
Ube2q2	0.197348	3.16E-31
Dpys	0.197071	3.84E-31
Trem2	0.197019	3.99E-31
Hmox1	0.196365	6.31E-31
St7	0.194517	2.28E-30
Tbxas1	0.19372	3.96E-30
Tiparp	0.184728	1.68E-27
Adam19	0.184624	1.79E-27
Ptges	0.183831	3.02E-27
Ubd	0.183583	3.55E-27
Slc11a1	0.183318	4.21E-27
Bst1	0.181359	1.50E-26
Serf1	0.180186	3.17E-26
Rnf24	0.179458	5.04E-26
Fhad1	0.179317	5.52E-26
Nfkb1	0.179279	5.65E-26
Msra	0.178263	1.08E-25
Dennd4c	0.177943	1.32E-25
Cd40	0.173499	2.09E-24
Slc41a2	0.173448	2.16E-24
Glipr1	0.173415	2.20E-24
Stra6l	0.167281	8.87E-23
Cd14	0.161963	1.95E-21
Ptpro	0.159863	6.43E-21
Apoe	0.159729	6.94E-21
Ier3	0.159394	8.38E-21
Gm21188	0.159111	9.83E-21
AA467197	0.149625	1.71E-18
Ptpn12	0.142855	5.60E-17
Tent5c	0.140865	1.51E-16
Acod1	0.14054	1.78E-16
Alas1	0.135644	1.92E-15
Ftl1	0.133469	5.36E-15
Mafb	0.127638	7.80E-14
Zc3hav1	0.1238	4.26E-13
Mertk	0.123345	5.19E-13
Ccrl2	0.118409	4.23E-12
Ctsb	0.108614	2.12E-10
Rsad2	0.106253	5.18E-10
Clec4n	0.0802048	2.81E-06
Chka	0.0789799	3.97E-06
Cd63	0.0727281	2.17E-05
Creg1	0.065555	0.00012978
