# Supplementary material for: CD38+ Alveolar macrophages mediate early control of M. tuberculosis proliferation in the lung
Source: Research Square preprint supplement (doi:10.21203/rs.3.rs-3934768/v1), 2024-07-15
Supplement: Supplementary file 4 [file 7a734fb166983630f0479f62.xlsx]

## Sheet: NOS2IMSpositivevsnegative
Positive LFC - Upregulated in NOS2+ IMs
	p_val	avg_log2FC	pct.1	pct.2	p_val_adj
Saa3	0	3.22071	0.786	0.335	0
Inhba	1.28179e-286	2.48208	0.51	0.073	2.90018e-282
Slc7a2	0	2.38789	0.756	0.178	0
Nos2	0	2.38372	0.674	0.167	0
Gpnmb	0	2.21469	0.775	0.197	0
Clec4e	0	1.99419	0.677	0.213	0
Slpi	5.33617e-240	1.95401	0.491	0.09	1.20736e-235
Ctsd	0	1.82512	0.978	0.801	0
Fabp5	0	1.75648	0.859	0.41	0
F10	0	1.74305	0.641	0.139	0
Pdpn	0	1.70173	0.552	0.089	0
Ccl5	3.08616e-218	1.70074	0.841	0.616	6.98275e-214
Clec4d	0	1.67712	0.772	0.265	0
Slc7a11	0	1.655	0.724	0.248	0
Hmox1	2.95643e-282	1.64633	0.711	0.286	6.68923e-278
Ubd	5.04124e-161	1.59892	0.467	0.141	1.14063e-156
Ly6i	0	1.59656	0.813	0.407	0
Hp	8.56311e-245	1.56998	0.495	0.091	1.93749e-240
Grina	0	1.56979	0.867	0.478	0
H2-M2	7.59028e-165	1.55712	0.577	0.24	1.71738e-160
Sdc1	4.49443e-268	1.54708	0.498	0.066	1.01691e-263
Acsl1	5.07414e-272	1.54008	0.771	0.436	1.14808e-267
Mgst1	0	1.53754	0.737	0.268	0
Fbxl5	9.75407e-253	1.5152	0.601	0.194	2.20696e-248
Lyz2	0	1.49099	0.991	0.959	0
AA467197	1.61309e-290	1.48885	0.869	0.527	3.64978e-286
Cfb	1.25393e-269	1.38479	0.629	0.211	2.83714e-265
Bst1	1.4741e-298	1.34561	0.698	0.262	3.33529e-294
Orm1	1.3957e-196	1.32646	0.36	0.031	3.1579e-192
Hilpda	3.47095e-163	1.29962	0.477	0.153	7.85336e-159
Cst7	1.03619e-181	1.26376	0.467	0.125	2.34449e-177
Rgcc	1.54349e-162	1.26324	0.465	0.134	3.49229e-158
Pld3	1.01846e-270	1.26015	0.708	0.286	2.30436e-266
Mif	7.43116e-281	1.23971	0.847	0.542	1.68137e-276
Clmp	1.30323e-197	1.20909	0.388	0.053	2.94868e-193
Ptges	2.20128e-123	1.15096	0.261	0.031	4.98061e-119
Sod2	4.96324e-290	1.14823	0.886	0.606	1.12298e-285
Fth1	0	1.12746	0.999	0.999	0
S100a8	1.98114e-194	1.12205	0.404	0.063	4.48252e-190
Alas1	4.12776e-181	1.12094	0.55	0.194	9.33946e-177
Cd63	1.07061e-250	1.10642	0.868	0.563	2.42237e-246
Pla2g7	2.27033e-226	1.08747	0.795	0.479	5.13686e-222
Ier3	1.01695e-123	1.06526	0.784	0.524	2.30096e-119
Smpdl3b	3.20804e-196	1.05518	0.581	0.205	7.2585e-192
Slc25a37	3.31997e-194	1.04746	0.58	0.196	7.51176e-190
C1s1	1.64416e-178	1.01299	0.367	0.054	3.72007e-174
Spp1	1.5619e-20	1.01067	0.184	0.106	3.53395e-16
Cstb	2.39522e-265	1.00228	0.91	0.696	5.41942e-261
Il1a	2.1288e-144	0.987085	0.364	0.074	4.81662e-140
Malt1	9.52596e-121	0.984723	0.769	0.494	2.15534e-116
Tmsb10	4.07507e-183	0.984276	0.947	0.87	9.22026e-179
Esd	2.72494e-156	0.981837	0.714	0.458	6.16545e-152
Nrp2	2.05496e-187	0.976528	0.66	0.292	4.64955e-183
Pfkl	3.81454e-183	0.949277	0.651	0.287	8.63079e-179
Pgk1	1.94702e-171	0.941079	0.758	0.473	4.40532e-167
Fpr2	2.08122e-158	0.937408	0.441	0.119	4.70898e-154
Rnf149	1.19317e-226	0.933234	0.908	0.702	2.69966e-222
Slc16a3	3.17975e-163	0.930506	0.579	0.224	7.19451e-159
Ccl6	9.96307e-15	0.928455	0.396	0.316	2.25425e-10
Procr	1.55366e-131	0.926694	0.664	0.351	3.51532e-127
Prdx1	9.34975e-181	0.926302	0.934	0.838	2.11547e-176
Ctss	0	0.924478	0.983	0.983	0
Hif1a	3.13471e-179	0.908939	0.805	0.51	7.09259e-175
Egr1	2.7943e-81	0.9082	0.565	0.321	6.32239e-77
Ftl1	0	0.9014	0.996	0.989	0
Tnfaip2	4.80429e-167	0.899137	0.869	0.546	1.08702e-162
Wfdc17	4.58282e-102	0.8925	0.773	0.578	1.03691e-97
Cd38	6.03587e-163	0.889264	0.505	0.171	1.36568e-158
Pgam1	1.28392e-183	0.884178	0.795	0.519	2.905e-179
C3	4.3471e-207	0.884065	0.917	0.733	9.83574e-203
Mmp2	5.96117e-161	0.882495	0.367	0.061	1.34877e-156
Id2	2.96678e-165	0.882138	0.826	0.527	6.71264e-161
Abca1	1.51605e-152	0.877107	0.613	0.277	3.43021e-148
Lrpap1	3.43886e-162	0.872423	0.668	0.358	7.78076e-158
Vat1	8.06232e-171	0.86445	0.484	0.141	1.82418e-166
Mcemp1	1.35677e-143	0.859911	0.546	0.213	3.06984e-139
Creg1	1.2484e-180	0.858323	0.857	0.675	2.82463e-176
Clec4n	1.84679e-102	0.852057	0.476	0.21	4.17854e-98
Prdx6	1.89505e-124	0.843074	0.731	0.452	4.28775e-120
Cd1d1	6.79957e-171	0.839987	0.376	0.062	1.53847e-166
Sgk1	8.08675e-170	0.826235	0.89	0.588	1.82971e-165
Gpx4	2.00164e-177	0.820503	0.833	0.583	4.52892e-173
Tpi1	1.06177e-174	0.8134	0.828	0.574	2.40237e-170
Chchd10	1.00874e-134	0.81078	0.527	0.212	2.28238e-130
S100a11	3.04671e-139	0.809959	0.706	0.443	6.89349e-135
Aldoa	8.52169e-193	0.799942	0.87	0.639	1.92812e-188
Lrrk2	5.80195e-153	0.795982	0.357	0.073	1.31275e-148
Ldha	1.44992e-135	0.794836	0.82	0.601	3.28059e-131
Clcn7	1.92897e-141	0.791587	0.701	0.395	4.36449e-137
Cybb	9.34929e-237	0.784466	0.968	0.933	2.11537e-232
Ctsl	1.33307e-133	0.784202	0.689	0.421	3.0162e-129
mt-Co1	2.73564e-202	0.783397	1	1	6.18966e-198
Cd9	6.51872e-114	0.780778	0.742	0.477	1.47492e-109
Prdx5	2.6526e-199	0.777654	0.938	0.846	6.00177e-195
Abcc5	1.73967e-120	0.775381	0.449	0.161	3.93618e-116
Iqsec1	1.50677e-140	0.770065	0.357	0.071	3.40921e-136
Atp6v1e1	5.02719e-148	0.767821	0.711	0.432	1.13745e-143
Gadd45a	6.78861e-115	0.76567	0.379	0.113	1.53599e-110
F7	4.83375e-87	0.759618	0.237	0.046	1.09368e-82
Cd274	6.98559e-121	0.757793	0.741	0.441	1.58056e-116
Serf1	8.06337e-126	0.748627	0.289	0.046	1.82442e-121
Itgb2	1.33037e-130	0.74444	0.803	0.593	3.0101e-126
Dram1	5.84148e-127	0.743082	0.559	0.249	1.32169e-122
Cd68	1.93693e-133	0.742057	0.79	0.566	4.38249e-129
Lgals3	5.12696e-174	0.74002	0.954	0.837	1.16003e-169
Atp6v0d2	1.21894e-109	0.734232	0.276	0.048	2.75796e-105
Gem	4.55401e-82	0.722615	0.185	0.022	1.03039e-77
Fam162a	1.0842e-96	0.721211	0.378	0.141	2.4531e-92
Lgals3bp	2.33168e-129	0.710318	0.753	0.51	5.27566e-125
Ly75	8.60355e-129	0.702955	0.273	0.038	1.94664e-124
Gda	5.30034e-121	0.699041	0.63	0.314	1.19925e-116
Csf2rb	1.04746e-105	0.68732	0.706	0.43	2.36998e-101
Hcar2	2.02646e-100	0.687072	0.458	0.197	4.58507e-96
Pkm	4.55917e-182	0.683121	0.937	0.831	1.03156e-177
Cd200r4	5.65387e-131	0.682041	0.426	0.131	1.27924e-126
Gapdh	1.37129e-100	0.680843	0.634	0.374	3.10268e-96
C1ra	3.51208e-119	0.678733	0.433	0.144	7.94643e-115
Slc1a2	5.27666e-105	0.677608	0.201	0.011	1.1939e-100
Ero1l	2.21633e-92	0.677052	0.368	0.127	5.01467e-88
Psap	1.55237e-249	0.670613	0.997	0.999	3.51238e-245
Slc2a1	1.08591e-94	0.668461	0.432	0.172	2.45698e-90
Capg	4.08313e-133	0.667407	0.779	0.517	9.2385e-129
Gbp2	4.17118e-113	0.664997	0.854	0.707	9.43772e-109
Hvcn1	1.95012e-102	0.664823	0.628	0.358	4.41234e-98
Plpp3	6.518e-121	0.660639	0.264	0.029	1.47476e-116
Plxna1	4.76159e-108	0.655396	0.361	0.109	1.07736e-103
Egr2	5.7123e-77	0.650095	0.316	0.108	1.29246e-72
Klhdc4	2.21402e-80	0.648644	0.348	0.129	5.00944e-76
Fam20c	1.17843e-104	0.647586	0.367	0.112	2.66633e-100
Lhfpl2	5.80342e-95	0.646093	0.494	0.21	1.31308e-90
Bhlhe41	1.51505e-116	0.644964	0.275	0.044	3.42796e-112
Msrb1	9.38425e-119	0.640336	0.829	0.583	2.12328e-114
Mt1	2.85212e-44	0.639243	0.654	0.488	6.45322e-40
Vegfa	7.60202e-74	0.637146	0.39	0.158	1.72003e-69
Itgam	3.08857e-105	0.633909	0.585	0.301	6.98821e-101
Tapbp	3.30738e-156	0.633176	0.926	0.825	7.48328e-152
Trem2	2.38572e-109	0.628618	0.711	0.418	5.39792e-105
Il1rn	3.47168e-64	0.627482	0.638	0.421	7.85501e-60
Plin2	1.3317e-90	0.626969	0.839	0.642	3.0131e-86
Cyb5a	2.75763e-89	0.614389	0.538	0.289	6.23941e-85
Txn1	4.08171e-158	0.612919	0.937	0.826	9.23529e-154
Mrpl38	3.5901e-86	0.612913	0.459	0.204	8.12295e-82
Man2a1	2.53492e-80	0.611506	0.532	0.289	5.73551e-76
Ppp1r12b	1.18345e-103	0.607684	0.329	0.092	2.67768e-99
Htra1	1.70193e-96	0.604732	0.283	0.066	3.85079e-92
Ecm1	1.35653e-89	0.600716	0.403	0.157	3.06929e-85
Acp5	3.18231e-89	0.600467	0.715	0.474	7.2003e-85
Agtrap	7.02441e-106	0.5982	0.486	0.207	1.58934e-101
Phlda1	3.27665e-30	0.589915	0.292	0.17	7.41375e-26
Hk2	3.8477e-83	0.58905	0.54	0.276	8.70582e-79
Mmp19	7.35981e-55	0.582493	0.249	0.093	1.66523e-50
Cd300lf	2.30691e-83	0.582324	0.522	0.267	5.21961e-79
Gde1	4.37663e-89	0.580276	0.553	0.297	9.90255e-85
Ptgs2	4.04476e-53	0.574313	0.703	0.519	9.15167e-49
Gbp5	6.00347e-53	0.574187	0.539	0.33	1.35835e-48
Emb	2.91306e-74	0.573083	0.445	0.207	6.59109e-70
Il7r	1.67078e-64	0.57268	0.282	0.107	3.7803e-60
Mt2	2.40937e-44	0.569716	0.139	0.038	5.45145e-40
Hist1h2bc	1.13138e-100	0.566261	0.295	0.076	2.55985e-96
Il11ra1	2.62941e-82	0.566142	0.359	0.135	5.94931e-78
Ctsz	2.10751e-226	0.563985	0.989	0.978	4.76844e-222
Bsg	1.13102e-93	0.559413	0.714	0.498	2.55905e-89
Ralgds	3.23913e-70	0.558261	0.497	0.264	7.32886e-66
Tnf	7.67608e-22	0.55484	0.449	0.318	1.73679e-17
Cebpb	3.951e-81	0.551727	0.876	0.661	8.93954e-77
Eno1	1.96849e-77	0.551276	0.625	0.394	4.45391e-73
H2-Oa	1.53299e-86	0.549409	0.332	0.11	3.46854e-82
App	1.12362e-77	0.548725	0.75	0.528	2.54231e-73
mt-Nd4	7.72826e-66	0.541448	0.985	0.943	1.7486e-61
Soat1	7.70233e-64	0.540565	0.63	0.38	1.74273e-59
Gsr	2.63695e-83	0.538451	0.476	0.232	5.96636e-79
Acod1	3.90552e-58	0.538275	0.497	0.298	8.83663e-54
Hpse	5.10662e-81	0.535102	0.373	0.141	1.15542e-76
Cxcl2	4.65877e-30	0.534262	0.766	0.677	1.05409e-25
Fn1	6.81279e-47	0.532489	0.199	0.068	1.54146e-42
Tmeff1	2.09383e-98	0.518373	0.245	0.045	4.73751e-94
Mertk	9.13708e-75	0.514354	0.399	0.172	2.06735e-70
Slc6a8	1.90613e-87	0.512704	0.251	0.057	4.3128e-83
mt-Co2	1.88459e-101	0.512307	1	0.999	4.26407e-97
Mpc1	3.31078e-69	0.512293	0.647	0.434	7.49098e-65
Smpdl3a	4.21878e-74	0.510419	0.529	0.293	9.54541e-70
Tnfrsf1b	9.04783e-71	0.509448	0.6	0.357	2.04716e-66
Plxnd1	1.56887e-74	0.505651	0.554	0.304	3.54974e-70
Lamp1	9.25046e-117	0.504946	0.932	0.86	2.09301e-112
Ddhd1	8.05682e-70	0.501114	0.515	0.279	1.82294e-65
Dmxl2	2.52359e-45	0.501103	0.311	0.152	5.70988e-41
Gns	8.33064e-78	0.50094	0.818	0.659	1.88489e-73
Slc48a1	5.65683e-73	0.496484	0.431	0.21	1.27992e-68
Bnip3	1.24924e-89	0.49391	0.241	0.052	2.82654e-85
Gng12	3.36258e-73	0.493879	0.481	0.236	7.60818e-69
Cln5	2.56541e-73	0.492644	0.338	0.128	5.8045e-69
Tst	1.56757e-105	0.49187	0.218	0.022	3.54678e-101
Bnip3l	8.45651e-71	0.490614	0.466	0.233	1.91337e-66
Hk3	8.36556e-72	0.487886	0.626	0.394	1.89279e-67
Src	7.17287e-70	0.481463	0.319	0.118	1.62293e-65
Olr1	1.30272e-52	0.477853	0.168	0.039	2.94754e-48
Cd14	1.13466e-54	0.47516	0.833	0.661	2.56727e-50
Naglu	2.99609e-67	0.47472	0.402	0.182	6.77895e-63
mt-Cytb	4.41632e-53	0.474576	0.989	0.977	9.99238e-49
Dst	7.58183e-46	0.47327	0.631	0.425	1.71546e-41
H2-K1	3.0757e-231	0.473147	0.992	0.996	6.95908e-227
Arhgap31	4.2202e-49	0.470461	0.4	0.214	9.54863e-45
mt-Co3	8.87137e-80	0.469683	1	1	2.00724e-75
Ifi27	1.28073e-65	0.46802	0.541	0.304	2.89779e-61
Tmbim4	1.48536e-67	0.465629	0.651	0.442	3.36077e-63
F13a1	2.54506e-68	0.465617	0.166	0.025	5.75845e-64
H2-Q7	2.8163e-63	0.46048	0.864	0.75	6.37216e-59
Atp6v0c	2.42212e-123	0.457634	0.957	0.915	5.48028e-119
Fam102b	2.75546e-51	0.454606	0.437	0.237	6.23451e-47
Plk2	2.03434e-28	0.45377	0.354	0.221	4.60289e-24
Osbpl8	8.09028e-48	0.452579	0.414	0.23	1.83051e-43
Fzd7	1.84246e-78	0.45222	0.21	0.042	4.16876e-74
Kmt5a	7.96096e-64	0.449707	0.37	0.165	1.80125e-59
H2-Q6	9.09928e-44	0.448217	0.712	0.502	2.0588e-39
Atp13a2	1.19483e-55	0.448067	0.613	0.395	2.70343e-51
Igf2r	9.62472e-67	0.447538	0.315	0.127	2.17769e-62
Fcor	1.76308e-85	0.447313	0.198	0.028	3.98914e-81
Cyba	7.53724e-151	0.447025	0.984	0.975	1.70538e-146
Ctnnb1	4.33733e-59	0.447011	0.568	0.352	9.81364e-55
Tmem189	1.44904e-60	0.446487	0.529	0.299	3.2786e-56
Rnf128	1.86991e-82	0.442967	0.212	0.04	4.23085e-78
Syngr1	7.35076e-66	0.437412	0.217	0.054	1.66318e-61
Bhlhe40	4.24871e-32	0.437009	0.498	0.317	9.61313e-28
Cpeb4	6.55045e-44	0.436638	0.393	0.215	1.4821e-39
H2-D1	3.97269e-135	0.432395	0.983	0.982	8.9886e-131
Mfsd7a	8.47933e-64	0.431811	0.206	0.053	1.91853e-59
Ftl1-ps1	1.85087e-57	0.430665	0.403	0.196	4.18777e-53
Osm	3.91992e-13	0.429033	0.442	0.345	8.86921e-09
Plod3	9.07263e-60	0.427825	0.453	0.239	2.05277e-55
Sgms2	6.7526e-72	0.42775	0.178	0.026	1.52784e-67
Gsap	4.60544e-54	0.425922	0.463	0.258	1.04203e-49
Aifm2	2.08997e-79	0.421515	0.24	0.06	4.72877e-75
Chil3	0.242163	0.419659	0.192	0.204	1
Gng11	3.57072e-68	0.416179	0.284	0.103	8.0791e-64
Gm16867	2.5127e-66	0.411818	0.222	0.061	5.68523e-62
Lrrc8c	2.9772e-48	0.41133	0.44	0.251	6.73621e-44
Osbpl3	3.59688e-56	0.409217	0.315	0.141	8.13829e-52
Cnn3	6.4722e-56	0.407795	0.326	0.145	1.4644e-51
Snx10	3.03752e-52	0.405879	0.653	0.434	6.8727e-48
Neu1	1.50219e-66	0.405385	0.516	0.288	3.39885e-62
Ctsb	9.67168e-92	0.402828	0.977	0.945	2.18831e-87
Lrp12	4.11718e-52	0.402417	0.236	0.081	9.31554e-48
Gstm1	4.58057e-59	0.400762	0.231	0.067	1.0364e-54
Selenom	2.27156e-38	0.398672	0.475	0.306	5.13963e-34
Npc2	2.60859e-114	0.398529	0.969	0.953	5.90219e-110
Csf2rb2	3.42014e-54	0.398279	0.376	0.181	7.73841e-50
Gm15056	3.97575e-17	0.397847	0.141	0.069	8.99552e-13
Socs1	1.41346e-42	0.396906	0.35	0.185	3.1981e-38
Tnfrsf9	8.48466e-39	0.396685	0.081	0.005	1.91974e-34
Ctsk	1.21468e-36	0.395915	0.136	0.034	2.74834e-32
Gpi1	2.00654e-50	0.395811	0.749	0.583	4.53999e-46
Anxa2	2.56457e-36	0.39368	0.549	0.369	5.8026e-32
Fuom	8.37806e-54	0.39217	0.325	0.144	1.89562e-49
Fabp4	1.73641e-18	0.391543	0.096	0.038	3.92879e-14
Fzd1	1.48093e-60	0.390743	0.164	0.032	3.35075e-56
Cyp4v3	4.05153e-55	0.38867	0.362	0.169	9.16699e-51
mt-Atp6	5.05457e-48	0.387276	1	1	1.14365e-43
Tbc1d9	1.68307e-47	0.386331	0.515	0.302	3.80811e-43
1110038F14Rik	4.54347e-58	0.385137	0.39	0.2	1.02801e-53
Parp10	2.21619e-44	0.384822	0.329	0.164	5.01434e-40
Timm8b	9.58572e-50	0.383493	0.45	0.249	2.16886e-45
Foxp4	2.06832e-54	0.383442	0.264	0.099	4.67978e-50
Upp1	5.87018e-54	0.381802	0.246	0.087	1.32819e-49
Samd8	3.63892e-48	0.381352	0.28	0.114	8.23342e-44
Pgd	7.15575e-44	0.380035	0.636	0.447	1.61906e-39
Ap3s1	4.17193e-53	0.377699	0.336	0.156	9.43942e-49
Anpep	6.77859e-42	0.376639	0.474	0.291	1.53372e-37
Atp6v0e	4.80322e-47	0.373077	0.787	0.667	1.08678e-42
Ninj1	2.17624e-49	0.372238	0.684	0.474	4.92396e-45
Pygl	2.7476e-52	0.371987	0.304	0.127	6.21671e-48
Jag1	4.98745e-45	0.371383	0.19	0.063	1.12846e-40
B2m	1.61676e-121	0.369139	0.979	0.991	3.65808e-117
Tuba4a	2.63668e-47	0.367785	0.346	0.171	5.96576e-43
Egln1	1.02175e-51	0.364614	0.277	0.112	2.3118e-47
Scarf1	9.98017e-53	0.364525	0.268	0.104	2.25811e-48
Fcgr3	6.26124e-46	0.363142	0.764	0.618	1.41667e-41
Chpt1	2.53852e-49	0.360433	0.249	0.094	5.74364e-45
Tarm1	4.7177e-59	0.359452	0.138	0.024	1.06743e-54
Mdm2	2.33997e-32	0.359178	0.542	0.383	5.29441e-28
Met	1.08664e-57	0.358549	0.145	0.022	2.45862e-53
Atp6v1a	1.06482e-52	0.357433	0.57	0.359	2.40925e-48
Mgll	5.54073e-34	0.357402	0.112	0.027	1.25365e-29
Wfdc21	2.90036e-26	0.35575	0.122	0.042	6.56234e-22
Myo10	1.40058e-47	0.35276	0.174	0.045	3.16894e-43
Ly6c2	8.68317e-23	0.352662	0.343	0.217	1.96465e-18
Psmb6	2.07682e-39	0.35174	0.708	0.553	4.69902e-35
Galnt6	2.94668e-46	0.351322	0.198	0.064	6.66716e-42
Acox3	3.62158e-32	0.351004	0.347	0.195	8.1942e-28
Tma16	2.75602e-37	0.347882	0.284	0.139	6.23577e-33
Icam1	1.44364e-33	0.341671	0.58	0.402	3.26637e-29
Cd33	1.70901e-58	0.338494	0.259	0.095	3.8668e-54
Rnh1	3.02658e-26	0.338465	0.614	0.456	6.84794e-22
Npepps	2.43876e-37	0.337354	0.299	0.149	5.51795e-33
S100a1	1.73622e-35	0.337303	0.418	0.246	3.92838e-31
2023-03-01	1.08487e-39	0.336204	0.402	0.235	2.45463e-35
Mcoln2	3.0763e-64	0.334212	0.151	0.021	6.96043e-60
Anxa4	8.31271e-40	0.333406	0.531	0.335	1.88083e-35
Ptgfrn	5.58254e-64	0.33021	0.158	0.025	1.26311e-59
Plekha1	1.0617e-39	0.329622	0.336	0.17	2.4022e-35
Il18bp	3.90217e-46	0.329016	0.637	0.427	8.82905e-42
Tgoln1	1.04687e-37	0.328491	0.491	0.315	2.36864e-33
Actn1	2.78634e-43	0.328083	0.213	0.074	6.30437e-39
Ggh	5.05532e-40	0.325882	0.537	0.362	1.14382e-35
Znrf1	5.94406e-48	0.325824	0.317	0.153	1.3449e-43
Igsf8	9.6437e-38	0.325512	0.477	0.301	2.18198e-33
Plec	5.95765e-35	0.324021	0.32	0.169	1.34798e-30
mt-Nd4l	8.1979e-28	0.323085	0.509	0.358	1.85486e-23
Adam8	4.35812e-27	0.32224	0.28	0.165	9.86067e-23
Arg2	2.24282e-37	0.322093	0.175	0.059	5.07461e-33
Cers6	3.2565e-33	0.322069	0.472	0.296	7.36816e-29
Klf4	3.56875e-16	0.319449	0.638	0.523	8.07466e-12
1810037I17Rik	3.45189e-30	0.317487	0.742	0.587	7.81025e-26
Glmp	1.07631e-42	0.317326	0.402	0.221	2.43525e-38
Tnip1	3.58357e-35	0.315363	0.449	0.274	8.10818e-31
Slc38a6	9.28793e-38	0.315207	0.231	0.105	2.10149e-33
Cd82	1.30264e-44	0.314423	0.387	0.208	2.94735e-40
Sgpl1	1.78171e-30	0.313832	0.572	0.399	4.03129e-26
Chka	6.37864e-10	0.313762	0.367	0.274	1.44323e-05
Gch1	2.8015e-40	0.311336	0.331	0.177	6.33867e-36
Rnasel	3.25554e-42	0.31067	0.216	0.086	7.36599e-38
Nus1	1.48492e-27	0.308675	0.411	0.253	3.35977e-23
Stra6l	2.50146e-46	0.307792	0.155	0.038	5.6598e-42
P2ry14	2.00681e-41	0.306857	0.341	0.178	4.54061e-37
Echs1	7.98791e-40	0.306771	0.406	0.232	1.80734e-35
mt-Nd2	6.13968e-13	0.306069	0.934	0.869	1.38916e-08
Rsad2	2.72646e-47	0.305965	0.37	0.19	6.16889e-43
Gys1	3.44874e-55	0.305838	0.169	0.045	7.80311e-51
Cd84	9.66434e-36	0.304697	0.52	0.341	2.18665e-31
Edem2	1.81188e-43	0.304063	0.374	0.203	4.09956e-39
Cd200	3.05118e-53	0.303723	0.114	0.009	6.90359e-49
Gbp7	1.43783e-29	0.303527	0.608	0.432	3.25323e-25
Tax1bp1	1.20155e-34	0.303468	0.702	0.547	2.71863e-30
Gm9844	5.90558e-48	0.303116	0.196	0.065	1.3362e-43
Hbegf	4.39782e-15	0.302706	0.095	0.037	9.9505e-11
mt-Nd5	5.86385e-26	0.302254	0.563	0.412	1.32675e-21
Degs1	4.91012e-36	0.30147	0.365	0.205	1.11096e-31
Slc31a2	2.73747e-40	0.300229	0.476	0.289	6.19379e-36
Fam129b	2.06382e-29	0.299835	0.233	0.114	4.66961e-25
Comtd1	3.7083e-35	0.298816	0.334	0.186	8.39039e-31
Bola2	8.72788e-36	0.298379	0.623	0.443	1.97477e-31
Mfge8	1.40527e-19	0.298147	0.09	0.033	3.17955e-15
Ccl3	3.89327e-15	0.29685	0.443	0.338	8.80891e-11
Agap1	1.01058e-35	0.296834	0.176	0.066	2.28653e-31
Cd164	3.83678e-31	0.296294	0.286	0.149	8.68111e-27
Crlf2	3.78989e-34	0.295487	0.659	0.5	8.575e-30
Ahnak2	1.14668e-49	0.295481	0.101	0.008	2.59449e-45
Eif4e	1.29951e-15	0.294171	0.458	0.335	2.94027e-11
Higd1a	3.23393e-29	0.293149	0.573	0.412	7.31708e-25
Rtn3	6.00231e-35	0.292734	0.567	0.384	1.35808e-30
Arfgef1	7.86121e-33	0.292149	0.384	0.224	1.77868e-28
Atp6v0b	3.04259e-39	0.290974	0.902	0.823	6.88417e-35
Rab32	1.20579e-29	0.290941	0.478	0.309	2.72822e-25
Tes	1.52864e-25	0.290467	0.265	0.146	3.45871e-21
Fnip2	4.15716e-29	0.290275	0.262	0.134	9.406e-25
Clec5a	2.72912e-36	0.290274	0.412	0.248	6.17491e-32
Gyg	7.97621e-41	0.290093	0.327	0.17	1.8047e-36
Kif1c	9.05441e-38	0.28875	0.293	0.145	2.04865e-33
Hspa1b	4.01577e-18	0.288383	0.266	0.172	9.08609e-14
Furin	1.0085e-22	0.288294	0.565	0.412	2.28183e-18
Rhob	4.5272e-23	0.287916	0.381	0.239	1.02432e-18
Gaa	3.13527e-41	0.28776	0.264	0.119	7.09387e-37
Slc27a1	4.61999e-42	0.287469	0.201	0.075	1.04532e-37
Ahnak	8.40463e-24	0.287122	0.62	0.443	1.90163e-19
Igsf6	4.83086e-32	0.286572	0.497	0.331	1.09303e-27
Hist1h1c	1.2547e-35	0.284228	0.202	0.08	2.83888e-31
Jak2	1.15923e-36	0.281975	0.353	0.202	2.62287e-32
Wars	8.38059e-26	0.281376	0.421	0.263	1.89619e-21
Pfkp	3.15203e-35	0.280544	0.575	0.389	7.13179e-31
Rai14	2.48335e-35	0.278743	0.16	0.058	5.61884e-31
Ncoa4	3.28588e-34	0.27863	0.257	0.122	7.43462e-30
Lilr4b	9.24449e-22	0.27854	0.422	0.294	2.09166e-17
Eaf1	1.08095e-40	0.277847	0.219	0.09	2.44575e-36
Hspa4l	2.52634e-34	0.277136	0.202	0.084	5.7161e-30
Lyst	3.00036e-30	0.276323	0.242	0.12	6.78861e-26
Hebp1	2.35342e-32	0.275817	0.348	0.202	5.32486e-28
Ttc39b	1.14997e-26	0.275741	0.273	0.147	2.60192e-22
Dennd3	4.50735e-43	0.275538	0.13	0.025	1.01983e-38
Fblim1	2.86584e-39	0.272291	0.243	0.11	6.48426e-35
Dstn	5.1236e-19	0.271819	0.539	0.391	1.15927e-14
Ralgps1	2.49235e-45	0.271762	0.113	0.016	5.63919e-41
Eea1	1.11303e-29	0.270395	0.401	0.246	2.51833e-25
Tpp1	1.10862e-33	0.269652	0.379	0.213	2.50835e-29
Atp1b3	1.48394e-30	0.2688	0.568	0.398	3.35756e-26
Rab11fip1	2.85859e-17	0.268796	0.241	0.154	6.46784e-13
Bri3	5.85461e-31	0.268332	0.822	0.696	1.32466e-26
S100a10	7.34302e-27	0.267725	0.594	0.434	1.66143e-22
Cd302	3.79582e-31	0.26587	0.433	0.28	8.58841e-27
Myof	5.3243e-25	0.265769	0.6	0.435	1.20468e-20
Dapk1	3.38565e-29	0.265507	0.253	0.134	7.66037e-25
Psmb5	1.92109e-29	0.265348	0.644	0.5	4.34665e-25
Batf2	2.14971e-30	0.264177	0.31	0.174	4.86393e-26
Ptpre	2.48057e-21	0.263645	0.539	0.383	5.61254e-17
Mfsd12	7.302e-34	0.263306	0.3	0.155	1.65215e-29
Gpr137b	1.40761e-31	0.263106	0.329	0.184	3.18486e-27
Tcirg1	6.22072e-30	0.26306	0.734	0.573	1.4075e-25
Tbc1d2	5.85323e-49	0.262127	0.12	0.016	1.32435e-44
Gpd2	5.6807e-29	0.261451	0.301	0.172	1.28531e-24
Nucb1	3.58426e-31	0.260986	0.422	0.255	8.10975e-27
Hcst	1.01404e-32	0.260259	0.339	0.185	2.29436e-28
Gclm	7.26175e-28	0.259383	0.23	0.114	1.64304e-23
Colgalt1	5.43487e-22	0.258786	0.488	0.336	1.22969e-17
Arl11	3.19721e-37	0.25818	0.259	0.125	7.234e-33
Ccr1	4.53556e-18	0.258018	0.256	0.152	1.02622e-13
Slc20a1	2.66578e-17	0.25775	0.301	0.198	6.03159e-13
Cdo1	1.03308e-32	0.257638	0.076	0.009	2.33744e-28
P4ha1	2.64585e-24	0.256907	0.329	0.195	5.9865e-20
Abcc1	3.89714e-24	0.256855	0.212	0.105	8.81766e-20
Arhgap24	2.11078e-33	0.256647	0.159	0.057	4.77584e-29
Cemip2	3.60169e-36	0.255158	0.169	0.06	8.14918e-32
Dnajb1	9.53663e-13	0.254314	0.295	0.203	2.15776e-08
Tmx4	4.38019e-10	0.254007	0.224	0.155	9.91063e-06
Cd24a	1.10511e-26	0.253721	0.088	0.025	2.50043e-22
Ptpn12	2.06103e-22	0.252519	0.251	0.143	4.66329e-18
Rftn1	1.79223e-32	0.251925	0.317	0.176	4.05509e-28
Scarb2	7.57266e-28	0.251774	0.644	0.485	1.71339e-23
Tap2	3.22638e-23	0.251329	0.697	0.545	7.30001e-19
Cd37	4.56851e-42	0.25118	0.272	0.125	1.03367e-37
Rhbdf2	7.66425e-26	0.249755	0.358	0.218	1.73411e-21
Rab7	2.36327e-24	0.248229	0.655	0.498	5.34714e-20
Arl5a	7.84449e-31	0.248139	0.324	0.177	1.77489e-26
Pmp22	3.65447e-23	0.24725	0.128	0.051	8.26861e-19
Sdc4	6.61175e-15	0.245944	0.513	0.397	1.49597e-10
Irgm1	1.16511e-32	0.2459	0.402	0.248	2.63618e-28
Nceh1	2.61137e-24	0.245889	0.4	0.258	5.9085e-20
Rexo2	1.50624e-22	0.245237	0.53	0.386	3.40802e-18
Atp6v1b2	8.31755e-19	0.244552	0.655	0.496	1.88193e-14
Pilra	1.79154e-24	0.244436	0.418	0.265	4.05355e-20
Sh3tc1	2.16983e-26	0.243993	0.171	0.077	4.90945e-22
Slc31a1	1.93884e-27	0.243813	0.381	0.238	4.38681e-23
Prdm1	3.61762e-13	0.243744	0.221	0.147	8.18524e-09
Ell2	4.46169e-16	0.242542	0.421	0.299	1.0095e-11
Dtnbp1	1.57458e-25	0.242444	0.391	0.242	3.56265e-21
Fcgr2b	4.85927e-23	0.242395	0.612	0.454	1.09946e-18
Gla	2.58581e-24	0.242382	0.394	0.238	5.85065e-20
Srxn1	7.87494e-32	0.242229	0.163	0.064	1.78178e-27
Mreg	1.52332e-51	0.242042	0.116	0.015	3.44666e-47
Atp6v1f	4.04598e-24	0.241795	0.778	0.682	9.15443e-20
Lif	1.08903e-17	0.240485	0.061	0.017	2.46404e-13
Tspo	4.73516e-34	0.236678	0.895	0.853	1.07138e-29
Serpinb9	5.92665e-27	0.235986	0.229	0.116	1.34096e-22
Aldoc	1.7637e-35	0.235752	0.185	0.072	3.99055e-31
Npc1	1.41776e-22	0.23502	0.354	0.219	3.20781e-18
Plet1	0.0598805	0.23478	0.052	0.041	1
Nampt	8.08013e-31	0.234079	0.862	0.741	1.82821e-26
Gdpd1	4.20284e-38	0.233835	0.137	0.039	9.50935e-34
Smox	2.81771e-24	0.233344	0.213	0.113	6.37534e-20
Cox7a2	1.96015e-23	0.233228	0.752	0.644	4.43505e-19
Tmem106b	4.44084e-33	0.232995	0.226	0.103	1.00478e-28
Cav1	1.56808e-32	0.232731	0.091	0.018	3.54793e-28
Gabarapl1	9.78189e-30	0.231847	0.255	0.126	2.21325e-25
Acpp	9.49481e-48	0.231627	0.097	0.007	2.1483e-43
Adora2a	2.93849e-32	0.230998	0.131	0.045	6.64864e-28
Rbpms	3.80798e-21	0.23083	0.257	0.143	8.61593e-17
Alkbh5	7.71304e-26	0.230705	0.332	0.193	1.74515e-21
1810058I24Rik	5.60002e-22	0.230551	0.489	0.33	1.26706e-17
Slamf8	4.90139e-21	0.23019	0.731	0.615	1.10899e-16
Calm3	1.25734e-14	0.230154	0.662	0.548	2.84487e-10
Tmem38b	3.14039e-37	0.229084	0.171	0.063	7.10546e-33
Ndrg1	1.11139e-13	0.228244	0.127	0.067	2.51464e-09
Enc1	3.77139e-28	0.227084	0.148	0.057	8.53315e-24
Chil1	2.30265e-27	0.226646	0.07	0.012	5.20999e-23
Trpm2	1.89665e-27	0.225243	0.337	0.203	4.29135e-23
H2-T22	2.70087e-23	0.224705	0.59	0.447	6.111e-19
Exoc3l4	3.88e-31	0.224578	0.161	0.063	8.77889e-27
Ndufv3	1.16347e-21	0.222278	0.456	0.308	2.63247e-17
Sash1	1.10611e-27	0.221731	0.419	0.281	2.50269e-23
Mgst2	1.46094e-46	0.220477	0.101	0.009	3.30553e-42
Zdhhc18	1.47775e-30	0.220452	0.184	0.082	3.34355e-26
Atp6v1c1	7.78425e-28	0.219213	0.38	0.24	1.76126e-23
Cdadc1	4.56927e-23	0.218559	0.133	0.054	1.03384e-18
Tmem140	2.74285e-30	0.218284	0.283	0.147	6.20596e-26
Ak4	1.04255e-34	0.217035	0.086	0.009	2.35887e-30
Spink2	1.98508e-34	0.216641	0.1	0.021	4.49144e-30
Sirpb1c	8.63554e-30	0.215145	0.222	0.11	1.95388e-25
Lyz1	2.13529e-27	0.215105	0.165	0.069	4.8313e-23
Cfap410	9.52636e-30	0.214722	0.211	0.101	2.15543e-25
Psmd1	4.41009e-20	0.214366	0.374	0.239	9.97826e-16
Sidt2	5.37207e-24	0.21407	0.298	0.179	1.21548e-19
Lgals8	1.12362e-22	0.213912	0.306	0.184	2.54229e-18
Igtp	8.52933e-20	0.213327	0.498	0.357	1.92985e-15
Htatip2	6.86999e-26	0.213159	0.261	0.134	1.5544e-21
Best1	9.69416e-28	0.212396	0.096	0.023	2.1934e-23
Plekhn1	9.03581e-21	0.212144	0.135	0.056	2.04444e-16
Ddit4	7.22941e-25	0.211938	0.07	0.015	1.63573e-20
C77080	3.31221e-36	0.211305	0.086	0.012	7.49421e-32
Atp6ap1	2.20044e-20	0.210754	0.66	0.507	4.97871e-16
Rab12	2.61976e-29	0.210728	0.258	0.131	5.92746e-25
Bscl2	3.22349e-23	0.210704	0.381	0.245	7.29347e-19
Chp1	7.26142e-17	0.209411	0.216	0.127	1.64297e-12
Vim	2.42793e-24	0.209299	0.973	0.937	5.49343e-20
Card19	5.87799e-24	0.208841	0.458	0.312	1.32995e-19
Rhoc	2.16318e-23	0.207555	0.185	0.092	4.89441e-19
Tlr2	2.70502e-15	0.207388	0.728	0.579	6.12039e-11
Ccl9	0.0886864	0.207245	0.244	0.221	1
Mapk3	1.27125e-20	0.206823	0.442	0.304	2.87632e-16
Ccrl2	1.26676e-17	0.206809	0.771	0.625	2.86617e-13
Il3ra	3.26168e-28	0.20675	0.376	0.23	7.37989e-24
Slx4ip	4.73492e-27	0.206691	0.124	0.043	1.07132e-22
Gpc1	1.99705e-37	0.206689	0.084	0.011	4.51852e-33
Insl6	2.01102e-33	0.20639	0.134	0.042	4.55012e-29
Papss2	8.31134e-34	0.205169	0.15	0.049	1.88052e-29
Il13ra1	1.65299e-32	0.204996	0.255	0.126	3.74005e-28
Acsl4	5.97477e-30	0.204698	0.272	0.15	1.35185e-25
Cyb5r3	4.06495e-28	0.203789	0.382	0.239	9.19735e-24
mt-Nd1	5.08105e-10	0.203752	0.947	0.891	1.14964e-05
Flot2	3.90645e-25	0.203292	0.196	0.092	8.83873e-21
Calhm6	8.92438e-15	0.203008	0.573	0.446	2.01923e-10
Gpat3	1.45525e-11	0.202496	0.055	0.022	3.29265e-07
Tmem30a	1.45761e-25	0.202472	0.392	0.25	3.298e-21
Cd22	6.6167e-32	0.202198	0.143	0.05	1.49709e-27
Map2k1	2.44069e-22	0.201299	0.263	0.15	5.52231e-18
Rffl	7.344e-17	0.201264	0.13	0.061	1.66165e-12
Arl8b	8.86903e-21	0.200942	0.378	0.246	2.00671e-16
Atp1a3	9.06519e-29	0.200023	0.158	0.059	2.05109e-24
Sirpa	1.37388e-20	0.199865	0.917	0.843	3.10854e-16
Glipr2	5.94625e-22	0.199568	0.181	0.092	1.3454e-17
Nfkbia	1.12302e-06	0.199008	0.879	0.822	0.0254095
Sort1	1.4426e-29	0.19818	0.107	0.028	3.26403e-25
Clec1b	1.34836e-29	0.197739	0.087	0.017	3.05081e-25
Ndufa1	5.36377e-16	0.197565	0.619	0.492	1.21361e-11
Bst2	3.01643e-31	0.197218	0.93	0.885	6.82497e-27
Lpp	3.29374e-22	0.19692	0.296	0.184	7.45242e-18
Sqstm1	4.20448e-16	0.196848	0.497	0.373	9.51306e-12
Apol7c	1.08075e-20	0.196611	0.131	0.054	2.44531e-16
Mroh1	7.23578e-21	0.19599	0.204	0.102	1.63717e-16
Cox17	1.79498e-23	0.195443	0.373	0.24	4.06132e-19
Mpeg1	6.18016e-18	0.195152	0.887	0.837	1.39832e-13
Rhoq	4.81407e-29	0.194926	0.274	0.149	1.08923e-24
Diaph1	2.58521e-15	0.194055	0.557	0.415	5.84931e-11
Nisch	1.35776e-22	0.193718	0.424	0.277	3.07208e-18
Flt1	4.75616e-15	0.193481	0.142	0.076	1.07613e-10
Ahcyl1	4.92907e-23	0.193293	0.245	0.132	1.11525e-18
Il17ra	7.12654e-21	0.192962	0.258	0.157	1.61245e-16
Rxra	1.33712e-19	0.192016	0.174	0.083	3.02538e-15
Psmd8	2.33872e-17	0.190092	0.598	0.461	5.29158e-13
Arrdc4	8.4664e-23	0.189999	0.313	0.191	1.91561e-18
Rnf217	2.02087e-15	0.189639	0.096	0.045	4.57242e-11
C1rl	2.77172e-27	0.189529	0.156	0.068	6.27128e-23
Larp4b	9.10027e-15	0.189417	0.427	0.314	2.05903e-10
Tmem87b	1.83762e-17	0.189231	0.205	0.116	4.1578e-13
Abca3	1.97081e-22	0.189048	0.239	0.132	4.45915e-18
Carmil1	1.52197e-21	0.189031	0.1	0.036	3.44362e-17
Stx3	4.49879e-19	0.18852	0.333	0.204	1.0179e-14
St3gal5	3.30161e-23	0.188118	0.233	0.12	7.47023e-19
Znhit1	1.85584e-23	0.18794	0.388	0.248	4.19902e-19
Tex264	1.39447e-22	0.187708	0.32	0.189	3.15514e-18
Btg1	1.19034e-13	0.187401	0.91	0.812	2.69326e-09
Rhov	5.96352e-21	0.18691	0.101	0.037	1.34931e-16
Cmc1	1.85236e-20	0.185841	0.332	0.206	4.19115e-16
Irak3	5.20491e-26	0.18559	0.156	0.067	1.17766e-21
Cd200r1	1.56765e-29	0.184653	0.103	0.03	3.54697e-25
Inf2	8.28957e-20	0.184121	0.136	0.065	1.8756e-15
Anxa1	3.54036e-16	0.184063	0.292	0.191	8.01043e-12
Tfec	2.82239e-17	0.18396	0.116	0.048	6.38595e-13
Arg1	7.93934e-11	0.183766	0.034	0.01	1.79635e-06
Hmgn2	2.11643e-21	0.183717	0.219	0.118	4.78864e-17
Nabp1	1.87383e-12	0.18312	0.18	0.115	4.23973e-08
Sqor	3.93058e-29	0.182682	0.214	0.106	8.89333e-25
Dtnb	1.27951e-32	0.182258	0.105	0.029	2.89502e-28
Eepd1	3.1186e-14	0.18221	0.116	0.058	7.05614e-10
Ptgr1	7.17948e-26	0.18066	0.094	0.027	1.62443e-21
Rusc2	1.44017e-27	0.180532	0.115	0.04	3.25853e-23
Lrmda	2.83912e-26	0.180216	0.179	0.077	6.42379e-22
Atg5	6.67982e-20	0.179984	0.348	0.224	1.51138e-15
Egln3	2.95873e-30	0.179808	0.061	0.006	6.69442e-26
Slc23a2	1.00808e-26	0.179596	0.237	0.134	2.28089e-22
Il15ra	1.83174e-20	0.179398	0.147	0.069	4.14449e-16
Plek	4.14114e-10	0.178839	0.801	0.708	9.36973e-06
Comt	5.40334e-12	0.178557	0.279	0.195	1.22256e-07
Atxn1	5.59601e-16	0.177986	0.09	0.039	1.26615e-11
Psmd10	1.77873e-21	0.177794	0.281	0.171	4.02455e-17
Cybc1	5.44502e-23	0.17768	0.369	0.226	1.23199e-18
Cox8a	4.08653e-19	0.177192	0.9	0.862	9.24618e-15
Txnrd1	1.52651e-16	0.176839	0.439	0.328	3.45388e-12
Lrrc8d	7.11526e-19	0.176817	0.272	0.175	1.6099e-14
Slfn2	4.44851e-15	0.176774	0.799	0.666	1.00652e-10
Pstpip2	1.56801e-20	0.176376	0.131	0.058	3.54779e-16
Glb1	1.34427e-24	0.176222	0.258	0.145	3.04154e-20
1110008P14Rik	8.69564e-25	0.17596	0.2	0.096	1.96748e-20
Amdhd2	3.52258e-19	0.174955	0.419	0.288	7.97018e-15
Casp7	1.34382e-21	0.174913	0.168	0.078	3.04054e-17
Tbc1d20	1.66622e-19	0.17464	0.253	0.148	3.76998e-15
Abr	2.6061e-17	0.174514	0.579	0.433	5.89655e-13
Pgm1	1.69819e-28	0.174299	0.136	0.055	3.84232e-24
Stom	1.38952e-22	0.173356	0.225	0.132	3.14394e-18
Mafg	2.38073e-12	0.17312	0.338	0.236	5.38664e-08
Plekhg1	2.16777e-17	0.172921	0.097	0.038	4.90479e-13
Shisa5	8.54298e-15	0.172831	0.736	0.62	1.93293e-10
Pcmtd1	4.28242e-23	0.172588	0.287	0.164	9.68941e-19
Gpr141	2.89516e-23	0.172159	0.281	0.164	6.55059e-19
Tnfaip6	1.78407e-20	0.170555	0.057	0.013	4.03665e-16
Rest	1.17211e-14	0.170017	0.329	0.214	2.65202e-10
Slc36a4	5.29632e-23	0.169498	0.127	0.052	1.19835e-18
Htr2b	3.31704e-29	0.169371	0.075	0.009	7.50514e-25
Atp6v1g1	9.34034e-13	0.169348	0.772	0.665	2.11335e-08
Ostm1	5.6573e-23	0.16905	0.264	0.153	1.28002e-18
Klf7	2.90817e-07	0.169012	0.185	0.125	0.00658003
Stat3	1.14953e-15	0.168976	0.621	0.49	2.60093e-11
Pgp	6.52266e-24	0.168616	0.283	0.169	1.47582e-19
Dpys	2.76315e-19	0.167982	0.097	0.035	6.2519e-15
Zc3h12c	2.1857e-13	0.167977	0.125	0.067	4.94536e-09
Slc2a6	2.64218e-16	0.167718	0.23	0.139	5.9782e-12
Ndufb1-ps	1.08757e-11	0.167319	0.605	0.481	2.46074e-07
Acvr1b	3.80894e-24	0.167144	0.103	0.037	8.61812e-20
Kdm5b	9.76459e-24	0.166982	0.094	0.029	2.20934e-19
Gba	9.29526e-20	0.166894	0.221	0.125	2.10314e-15
Ttc39c	2.59606e-22	0.166711	0.148	0.07	5.87386e-18
Myo5a	1.24075e-12	0.166299	0.353	0.244	2.80733e-08
Aig1	6.33396e-17	0.165903	0.27	0.166	1.43312e-12
C1galt1	7.50153e-22	0.165613	0.136	0.059	1.6973e-17
Ly6a	8.74917e-13	0.165607	0.796	0.699	1.97959e-08
Renbp	1.98808e-18	0.165319	0.32	0.209	4.49824e-14
Hsph1	1.57373e-11	0.165151	0.228	0.152	3.56071e-07
Gbp6	1.28082e-17	0.165069	0.187	0.101	2.89799e-13
Tnfrsf26	1.35413e-30	0.164878	0.068	0.006	3.06386e-26
Romo1	1.06475e-18	0.1643	0.559	0.429	2.4091e-14
Gbe1	9.75717e-27	0.16397	0.117	0.041	2.20766e-22
Asb11	4.71556e-25	0.163578	0.093	0.026	1.06694e-20
Chchd6	1.77039e-25	0.163332	0.117	0.042	4.00569e-21
Hexa	1.4803e-12	0.163151	0.872	0.811	3.34933e-08
Scamp1	5.61184e-22	0.162451	0.166	0.078	1.26974e-17
Pycard	8.75304e-16	0.16229	0.664	0.546	1.98046e-11
Riok3	1.24695e-15	0.162073	0.456	0.34	2.82136e-11
Il12a	5.36244e-26	0.161975	0.041	0.001	1.21331e-21
Pi4k2b	7.95178e-19	0.161642	0.127	0.049	1.79917e-14
Mcfd2	9.44536e-19	0.161473	0.351	0.228	2.13711e-14
Atp6v0d1	8.84401e-17	0.160866	0.449	0.322	2.00105e-12
Rnf130	4.39765e-18	0.160201	0.543	0.411	9.95012e-14
Lrrc8b	2.12141e-28	0.160175	0.097	0.027	4.7999e-24
Nck1	2.66365e-13	0.159859	0.157	0.083	6.02677e-09
Pim3	2.69044e-14	0.15984	0.377	0.27	6.08739e-10
Lilrb4a	1.00805e-07	0.158929	0.235	0.179	0.00228081
Cav2	3.17696e-22	0.158781	0.134	0.053	7.18819e-18
Arhgap10	7.37186e-18	0.158749	0.196	0.111	1.66796e-13
Rcl1	3.71544e-19	0.158072	0.098	0.035	8.40656e-15
Fbxo22	6.99304e-23	0.157936	0.189	0.096	1.58225e-18
Tagln2	4.00892e-12	0.157902	0.779	0.676	9.07059e-08
Retreg1	1.76844e-15	0.157841	0.222	0.13	4.00127e-11
Ass1	3.11495e-20	0.157563	0.672	0.523	7.04788e-16
Cdc42ep2	1.21787e-25	0.157546	0.129	0.052	2.75555e-21
Rab3d	1.31721e-20	0.157352	0.162	0.08	2.98033e-16
Fbxo32	5.29867e-12	0.157306	0.109	0.055	1.19888e-07
Ecpas	1.35372e-14	0.156775	0.313	0.199	3.06292e-10
Bdp1	3.37662e-12	0.156521	0.241	0.154	7.63994e-08
Nxn	1.61303e-23	0.156471	0.109	0.036	3.64965e-19
Idh1	2.74008e-14	0.156135	0.169	0.097	6.19971e-10
Slc22a4	3.56678e-27	0.156101	0.078	0.014	8.0702e-23
Msantd3	3.40106e-28	0.156098	0.077	0.013	7.69524e-24
Fgd6	2.42786e-19	0.15592	0.083	0.023	5.49328e-15
Emilin2	3.48249e-20	0.155857	0.315	0.199	7.87947e-16
Isoc1	1.84543e-16	0.155604	0.298	0.191	4.17546e-12
Gm20594	2.18338e-11	0.155394	0.242	0.156	4.94011e-07
Tatdn2	4.6419e-20	0.155393	0.236	0.138	1.05028e-15
Chpf2	6.54127e-20	0.15532	0.237	0.142	1.48003e-15
Cd44	3.66928e-06	0.154997	0.818	0.714	0.083021
Sephs2	8.05614e-20	0.154485	0.172	0.086	1.82278e-15
Ticam2	2.0564e-22	0.154334	0.136	0.06	4.6528e-18
Ly9	4.24942e-17	0.154139	0.299	0.19	9.61474e-13
Prkcsh	4.75638e-23	0.154074	0.401	0.263	1.07618e-18
Gng5	1.09616e-13	0.153994	0.751	0.664	2.48016e-09
Svil	1.34859e-10	0.153659	0.139	0.085	3.05132e-06
Galns	2.34219e-26	0.153559	0.203	0.105	5.29945e-22
Emp1	0.0112934	0.152934	0.087	0.067	1
Fmnl2	2.33924e-14	0.15275	0.271	0.177	5.29276e-10
Tbca	1.44336e-10	0.152451	0.713	0.622	3.26574e-06
Mgat1	9.09241e-15	0.152378	0.436	0.313	2.05725e-10
H2afj	2.01139e-15	0.152152	0.709	0.6	4.55096e-11
Slc5a3	0.000129866	0.151823	0.09	0.058	1
Mctp1	5.58912e-20	0.151815	0.101	0.039	1.26459e-15
mt-Nd3	8.95503e-10	0.151451	0.471	0.385	2.02616e-05
Metap1	3.29985e-17	0.150803	0.15	0.077	7.46624e-13
Hopx	4.73417e-18	0.150681	0.117	0.047	1.07115e-13
Itgb1	2.19804e-13	0.150177	0.634	0.528	4.97328e-09
Trim25	3.55168e-08	0.150013	0.349	0.27	0.000803604
Wsb2	2.11742e-14	0.149598	0.346	0.23	4.79089e-10
Arl6ip5	1.56548e-14	0.149274	0.139	0.071	3.54205e-10
Adgb	1.91342e-19	0.148856	0.073	0.022	4.32931e-15
Ipmk	5.59326e-09	0.148841	0.153	0.103	0.000126553
Trappc6a	2.67285e-19	0.148179	0.249	0.145	6.04758e-15
Ptgir	6.73849e-25	0.148173	0.062	0.008	1.52465e-20
Vdac1	1.87719e-10	0.148112	0.45	0.338	4.24733e-06
Adrb2	1.21379e-07	0.147531	0.138	0.092	0.00274633
Kynu	1.1659e-17	0.147434	0.15	0.075	2.63796e-13
Tbk1	1.85457e-15	0.147037	0.223	0.135	4.19616e-11
Nfe2l1	1.01787e-13	0.146888	0.377	0.271	2.30304e-09
Prelid2	2.26014e-22	0.146728	0.093	0.028	5.11379e-18
9530068E07Rik	8.67561e-16	0.146727	0.424	0.296	1.96294e-11
Ccdc71l	6.31064e-22	0.146469	0.223	0.129	1.42785e-17
Ankrd12	8.11231e-13	0.146077	0.27	0.187	1.83549e-08
St3gal1	2.03157e-15	0.14582	0.201	0.116	4.59662e-11
Pla2g4a	3.31985e-12	0.145602	0.28	0.188	7.51149e-08
Twsg1	3.26461e-24	0.145548	0.146	0.065	7.38651e-20
Mocos	3.94317e-23	0.145264	0.096	0.031	8.92183e-19
Zbtb11	5.13036e-08	0.144704	0.142	0.091	0.00116079
Ckap2l	1.08257e-07	0.144378	0.044	0.019	0.00244942
Epha4	2.75978e-24	0.144052	0.051	0.001	6.24427e-20
Zfp292	1.08848e-13	0.143948	0.195	0.123	2.4628e-09
Stx2	3.7538e-19	0.143829	0.184	0.1	8.49334e-15
Prr13	3.4105e-12	0.143515	0.641	0.519	7.71661e-08
Dtx3	6.4929e-16	0.143487	0.094	0.041	1.46908e-11
Dpp7	1.07111e-20	0.143378	0.16	0.084	2.42349e-16
Dennd4c	3.02144e-16	0.143372	0.125	0.061	6.8363e-12
Retreg2	1.90797e-16	0.143362	0.244	0.154	4.31698e-12
Fam20b	7.93381e-17	0.142498	0.176	0.096	1.7951e-12
Scd2	2.4646e-15	0.141892	0.142	0.075	5.5764e-11
Ppp2r1a	8.93094e-19	0.140901	0.417	0.286	2.02072e-14
Per2	1.5455e-18	0.140706	0.064	0.017	3.49686e-14
Gpaa1	1.97687e-19	0.140511	0.21	0.119	4.47286e-15
Plekhm2	2.07049e-10	0.140258	0.213	0.14	4.6847e-06
AC149090.1	9.05795e-11	0.140135	0.306	0.222	2.04945e-06
Aplp2	2.6226e-12	0.140091	0.446	0.324	5.93391e-08
Vamp4	3.84366e-17	0.139853	0.257	0.161	8.69666e-13
Stxbp2	1.55034e-18	0.13953	0.338	0.228	3.5078e-14
Anxa7	2.05491e-18	0.139502	0.287	0.179	4.64944e-14
Cept1	2.17251e-15	0.139497	0.342	0.23	4.91553e-11
Fndc3b	1.67131e-17	0.139458	0.245	0.149	3.78151e-13
Arid3a	1.74978e-16	0.139436	0.104	0.045	3.95905e-12
Pgap1	7.58377e-14	0.139346	0.142	0.074	1.7159e-09
H2-DMb2	3.78966e-22	0.139082	0.143	0.063	8.57449e-18
Arl2	1.79172e-21	0.139078	0.171	0.083	4.05394e-17
Pcnx	7.76507e-11	0.138821	0.165	0.097	1.75692e-06
Spata13	2.62587e-14	0.138724	0.195	0.118	5.9413e-10
Hk1	1.09283e-15	0.138489	0.166	0.092	2.47263e-11
Aldh3b1	4.15977e-13	0.138155	0.346	0.233	9.4119e-09
Itgb7	7.25779e-16	0.138027	0.388	0.274	1.64215e-11
Hspa1a	1.61423e-12	0.138007	0.439	0.332	3.65235e-08
Gpr84	2.41484e-15	0.137619	0.168	0.095	5.46383e-11
Hbb-bs	0.508583	0.137474	0.046	0.037	1
Cblb	3.24802e-11	0.137374	0.167	0.101	7.34896e-07
Mvd	1.07696e-16	0.137086	0.14	0.071	2.43673e-12
Fam234a	2.52818e-18	0.137034	0.184	0.101	5.72025e-14
Creg2	1.48985e-20	0.136977	0.134	0.057	3.37093e-16
Surf4	3.70487e-13	0.136646	0.49	0.367	8.38264e-09
AB124611	2.09702e-14	0.136414	0.42	0.294	4.74472e-10
Tcf7l2	3.38322e-05	0.1363	0.274	0.21	0.765487
Acox1	2.38288e-09	0.136238	0.145	0.092	5.3915e-05
Cflar	2.72135e-09	0.135808	0.594	0.47	6.15734e-05
Fbxo30	1.76025e-12	0.135718	0.115	0.065	3.98275e-08
Sumf1	4.90107e-19	0.135277	0.243	0.143	1.10892e-14
Ift172	1.75357e-16	0.135139	0.189	0.112	3.96763e-12
Tmem268	2.79126e-14	0.134888	0.173	0.098	6.3155e-10
Snx7	2.0225e-21	0.134638	0.09	0.027	4.57612e-17
Lamtor3	2.41308e-14	0.134601	0.327	0.215	5.45983e-10
Il6	5.27922e-09	0.134165	0.045	0.018	0.000119448
Aopep	7.35932e-14	0.133855	0.205	0.13	1.66512e-09
Xdh	2.73973e-14	0.133669	0.331	0.22	6.1989e-10
Crbn	9.65005e-19	0.133582	0.113	0.047	2.18342e-14
Atg9a	1.33019e-15	0.133563	0.111	0.049	3.00969e-11
Tmem165	1.76961e-14	0.13347	0.198	0.114	4.00392e-10
Rdh11	2.26871e-21	0.133342	0.089	0.034	5.13318e-17
Ltbp3	8.56355e-25	0.133177	0.087	0.024	1.93759e-20
Hsd17b10	2.59096e-16	0.132895	0.236	0.136	5.8623e-12
Sars	3.26559e-13	0.132801	0.256	0.17	7.38872e-09
Wbp2	1.40326e-17	0.132515	0.361	0.236	3.17501e-13
Pacs2	2.11446e-18	0.132376	0.232	0.14	4.78417e-14
Tecpr1	4.79158e-16	0.132312	0.103	0.046	1.08414e-11
Atf5	5.28941e-17	0.132245	0.081	0.031	1.19678e-12
Mtm1	2.45955e-12	0.132038	0.12	0.068	5.56498e-08
Adssl1	2.30947e-12	0.131936	0.22	0.14	5.2254e-08
Fas	6.75944e-19	0.131774	0.14	0.066	1.52939e-14
Gsto1	1.52162e-12	0.131031	0.19	0.112	3.44282e-08
Vegfb	1.08981e-23	0.130893	0.094	0.028	2.46581e-19
Pbxip1	4.59847e-13	0.130888	0.54	0.408	1.04045e-08
Stxbp5	1.27851e-24	0.130722	0.108	0.039	2.89276e-20
Trib1	0.00981059	0.130632	0.446	0.391	1
Nedd9	2.18993e-05	0.130523	0.178	0.123	0.495493
Ctsa	2.92701e-10	0.129862	0.798	0.709	6.62265e-06
Plpp1	3.1724e-21	0.129778	0.1	0.035	7.17788e-17
Vmp1	7.29502e-12	0.129521	0.349	0.242	1.65057e-07
Trem1	1.53822e-06	0.128943	0.112	0.076	0.0348038
Mtmr3	2.51726e-14	0.128917	0.222	0.139	5.69556e-10
Abhd16a	3.08684e-19	0.128888	0.247	0.15	6.98428e-15
Lrp10	1.33099e-12	0.128876	0.419	0.299	3.0115e-08
Lonrf3	9.73052e-17	0.12869	0.055	0.014	2.20163e-12
Ggta1	6.91927e-15	0.128578	0.232	0.14	1.56555e-10
Aga	3.7121e-19	0.128353	0.196	0.111	8.399e-15
Spint2	2.10353e-20	0.128266	0.074	0.017	4.75944e-16
Ggct	1.22319e-18	0.128246	0.21	0.123	2.7676e-14
Il2rg	9.65714e-19	0.128194	0.43	0.309	2.18502e-14
Plcb1	6.43751e-09	0.128097	0.04	0.014	0.000145655
Tubb4b	1.25652e-10	0.127941	0.278	0.192	2.84301e-06
Frrs1	2.22632e-09	0.127849	0.226	0.15	5.03728e-05
Pilrb2	3.67173e-20	0.127708	0.187	0.102	8.30766e-16
Slc39a4	4.77941e-24	0.127651	0.067	0.017	1.08139e-19
Mmp12	0.00035361	0.127597	0.109	0.076	1
Klf2	1.73015e-07	0.127424	0.55	0.472	0.00391464
Trappc2l	1.36283e-14	0.127113	0.476	0.349	3.08355e-10
Pdk1	4.4515e-17	0.12702	0.172	0.092	1.0072e-12
Ppp1r14b	6.25875e-16	0.126782	0.454	0.337	1.41611e-11
Tapt1	5.63604e-17	0.126376	0.096	0.039	1.27521e-12
Pttg1ip	6.82043e-18	0.126098	0.306	0.2	1.54319e-13
Tmem63a	6.30303e-14	0.125741	0.193	0.112	1.42612e-09
Magee1	4.83899e-19	0.125376	0.051	0.007	1.09487e-14
Gnaq	1.52112e-09	0.124906	0.356	0.261	3.4417e-05
Atp11a	2.35065e-15	0.124799	0.105	0.048	5.31859e-11
Mob3b	4.66235e-16	0.124501	0.091	0.034	1.0549e-11
Tmbim6	8.37574e-09	0.123907	0.875	0.804	0.000189509
Arid5b	1.34811e-09	0.123699	0.42	0.319	3.05024e-05
Mki67	5.96001e-10	0.123165	0.141	0.087	1.34851e-05
BC031181	1.06812e-14	0.123163	0.397	0.282	2.41674e-10
Polr2g	7.94427e-16	0.122708	0.434	0.311	1.79747e-11
Gbp4	1.75617e-10	0.122331	0.489	0.371	3.9735e-06
Prss46	6.47177e-21	0.122188	0.056	0.009	1.4643e-16
Clk4	4.09257e-06	0.122113	0.258	0.189	0.0925985
Fnip1	1.16454e-08	0.1219	0.29	0.209	0.000263489
Acot13	1.70346e-18	0.121791	0.179	0.096	3.85424e-14
Pcdh7	4.19615e-21	0.121603	0.043	0.004	9.49421e-17
Ctps2	9.4957e-14	0.121494	0.15	0.078	2.1485e-09
Sptlc2	2.989e-13	0.121366	0.322	0.217	6.76291e-09
Ado	4.06008e-14	0.121263	0.153	0.085	9.18633e-10
Stx8	4.91564e-13	0.121076	0.332	0.222	1.11221e-08
Lamtor2	2.54498e-13	0.120198	0.648	0.519	5.75828e-09
Mink1	3.5369e-13	0.119683	0.165	0.097	8.00259e-09
Il12rb1	4.07369e-17	0.119522	0.178	0.099	9.21712e-13
Col4a3bp	2.019e-09	0.119091	0.179	0.113	4.56819e-05
Derl2	2.06073e-14	0.118737	0.295	0.191	4.66261e-10
Ldhb	9.26729e-17	0.11866	0.146	0.075	2.09682e-12
Pag1	1.09298e-11	0.118458	0.158	0.096	2.47298e-07
Jak1	2.59337e-11	0.118341	0.39	0.275	5.86777e-07
Cxcl3	7.34835e-05	0.118103	0.019	0.007	1
Plaat3	7.65997e-08	0.117621	0.651	0.533	0.00173314
Gpcpd1	0.243281	0.117475	0.179	0.164	1
Cpq	2.99462e-18	0.117075	0.338	0.225	6.77563e-14
Wdr91	1.52514e-12	0.116552	0.163	0.097	3.45078e-08
Slc16a1	9.01437e-13	0.116226	0.088	0.043	2.03959e-08
Csf1	8.36953e-11	0.116096	0.045	0.014	1.89369e-06
Btbd16	1.389e-24	0.115775	0.055	0.007	3.14276e-20
Erap1	1.35042e-17	0.115308	0.292	0.188	3.05545e-13
Maged1	3.88118e-12	0.115268	0.058	0.025	8.78155e-08
Nlrp3	0.000916042	0.115189	0.458	0.403	1
Grhpr	2.52442e-18	0.115092	0.074	0.023	5.71175e-14
Kif13b	1.27675e-10	0.115007	0.147	0.095	2.88877e-06
Zfp503	9.7823e-17	0.114624	0.06	0.018	2.21334e-12
Camsap1	2.38501e-13	0.114122	0.113	0.051	5.39631e-09
Ctla2b	3.09535e-26	0.114081	0.075	0.017	7.00355e-22
Ifi47	1.98379e-17	0.113895	0.382	0.264	4.48852e-13
Mr1	2.88636e-19	0.113424	0.083	0.028	6.53068e-15
Bub1b	1.2953e-15	0.113326	0.088	0.036	2.93074e-11
Tspan4	9.15822e-17	0.113169	0.183	0.1	2.07214e-12
Hbp1	1.29351e-15	0.113085	0.248	0.155	2.9267e-11
Cxcl1	2.12052e-06	0.113028	0.112	0.076	0.047979
Pik3r6	3.8486e-10	0.112896	0.151	0.096	8.70785e-06
Net1	7.05116e-05	0.112893	0.036	0.02	1
Ndufs5	1.69133e-09	0.112742	0.606	0.493	3.8268e-05
Ano6	1.28535e-10	0.112565	0.211	0.138	2.90823e-06
P4hb	1.01043e-12	0.112512	0.586	0.462	2.28619e-08
Baiap2	2.84572e-07	0.112254	0.159	0.107	0.00643872
Gm5617	6.29279e-16	0.112248	0.175	0.096	1.42381e-11
Tm9sf3	1.10841e-09	0.112231	0.487	0.366	2.50789e-05
Mcee	6.24056e-15	0.112155	0.193	0.119	1.41199e-10
Prkar2b	1.08351e-10	0.112026	0.075	0.029	2.45155e-06
Cyfip2	1.16881e-14	0.111621	0.245	0.153	2.64454e-10
Pebp1	1.5861e-10	0.111495	0.587	0.478	3.58871e-06
Ndufb3	5.56187e-09	0.110755	0.6	0.491	0.000125843
Por	1.31143e-16	0.110549	0.276	0.178	2.96724e-12
Gas2l3	3.60616e-11	0.110517	0.211	0.139	8.15929e-07
Arl1	2.31388e-15	0.11042	0.349	0.239	5.23538e-11
Atp6ap2	1.28275e-06	0.1098	0.652	0.544	0.0290235
Cerk	3.13037e-09	0.109553	0.285	0.201	7.08278e-05
Acadl	9.70632e-12	0.109415	0.291	0.194	2.19615e-07
Sntb2	2.76624e-10	0.109108	0.15	0.101	6.2589e-06
Gnl1	6.17278e-13	0.108787	0.283	0.188	1.39665e-08
Klhl6	4.83541e-16	0.10871	0.24	0.15	1.09406e-11
Tcn2	3.23873e-19	0.108604	0.318	0.206	7.32795e-15
Kat6b	0.326778	0.108449	0.066	0.056	1
Enpp5	1.17392e-16	0.108435	0.107	0.049	2.6561e-12
Ltb4r1	6.06887e-14	0.108293	0.088	0.043	1.37314e-09
Coa5	6.19058e-13	0.10789	0.465	0.348	1.40068e-08
Naga	2.06682e-19	0.107595	0.287	0.174	4.67639e-15
Phlda3	1.05871e-09	0.107539	0.061	0.027	2.39543e-05
Ric1	4.45534e-10	0.107301	0.217	0.154	1.00806e-05
Orm2	2.62072e-21	0.107163	0.04	0.002	5.92964e-17
Rps6ka4	1.41116e-12	0.106883	0.193	0.124	3.1929e-08
Tnfsf12	1.5386e-12	0.106703	0.277	0.19	3.48124e-08
Tsc22d1	2.76445e-10	0.106382	0.103	0.057	6.25485e-06
Syk	2.46004e-08	0.10624	0.52	0.408	0.000556609
Lsr	1.59178e-06	0.106207	0.082	0.049	0.0360156
Pgpep1	1.33599e-12	0.106131	0.094	0.042	3.02281e-08
Hspa9	6.26283e-09	0.105732	0.483	0.363	0.000141703
Mpp1	2.78823e-12	0.105598	0.325	0.23	6.30864e-08
Optn	9.8125e-15	0.105422	0.077	0.033	2.22018e-10
Pi4ka	1.9537e-10	0.105368	0.155	0.097	4.42045e-06
Rab10	3.4052e-11	0.105348	0.499	0.386	7.70462e-07
Golph3l	4.53862e-17	0.105186	0.123	0.06	1.02691e-12
Tchh	3.27058e-15	0.104905	0.045	0.01	7.40001e-11
Phlpp1	3.4627e-14	0.104824	0.14	0.073	7.8347e-10
Commd3	7.64208e-09	0.104384	0.302	0.213	0.00017291
Rora	5.36717e-10	0.104246	0.077	0.037	1.21438e-05
Aldh2	5.10686e-17	0.104071	0.374	0.248	1.15548e-12
Dusp3	1.07622e-11	0.103975	0.251	0.166	2.43506e-07
Dgat1	3.36949e-09	0.10383	0.184	0.125	7.6238e-05
Ugp2	1.03334e-11	0.10358	0.291	0.194	2.33803e-07
Mitf	4.11441e-09	0.103503	0.237	0.17	9.30927e-05
Parp3	1.62796e-09	0.103298	0.114	0.058	3.68342e-05
Golgb1	7.81671e-09	0.102887	0.301	0.206	0.000176861
Ndufc1	9.83963e-09	0.10288	0.62	0.513	0.000222632
Fis1	4.3933e-08	0.102878	0.621	0.512	0.000994028
mt-Atp8	8.43823e-11	0.102736	0.211	0.148	1.90923e-06
Mlkl	2.56448e-14	0.102735	0.106	0.051	5.8024e-10
Il1rl2	3.78182e-15	0.10265	0.043	0.008	8.55675e-11
Ogfod3	1.18741e-18	0.102304	0.074	0.024	2.68663e-14
Plekhm3	3.7497e-11	0.102161	0.182	0.122	8.48406e-07
Pdgfrl	3.45936e-10	0.101146	0.039	0.011	7.82714e-06
Slc6a12	2.57915e-23	0.101067	0.039	0.002	5.83558e-19
Tmco4	1.01794e-13	0.100829	0.099	0.051	2.30319e-09
Ugcg	1.53228e-08	0.100751	0.248	0.179	0.000346694
Ampd3	2.5664e-18	0.10045	0.059	0.015	5.80674e-14
Arl8a	6.68753e-13	0.100298	0.318	0.219	1.51312e-08
Itga1	1.7877e-14	0.100188	0.042	0.008	4.04484e-10
Tm9sf4	1.78841e-12	0.0996614	0.243	0.153	4.04645e-08
Fam219a	4.31587e-13	0.0995547	0.075	0.032	9.7651e-09
Stac2	9.47761e-22	0.09916	0.04	0.001	2.1444e-17
Iah1	1.37807e-10	0.0989698	0.329	0.241	3.11801e-06
Tob1	0.00090186	0.0988742	0.148	0.119	1
Rnaset2b	1.15241e-15	0.0985294	0.089	0.035	2.60744e-11
Pnp2	1.31491e-14	0.0982292	0.071	0.028	2.97511e-10
Cox7c	4.56156e-07	0.0980294	0.877	0.842	0.010321
Nfil3	1.29434e-08	0.0980011	0.426	0.322	0.000292857
Tigd2	1.66802e-14	0.0979865	0.155	0.086	3.77405e-10
Irgm2	6.35758e-16	0.0979779	0.234	0.145	1.43847e-11
Ogdh	8.39643e-10	0.0978515	0.322	0.228	1.89978e-05
Scly	2.15397e-12	0.0976256	0.124	0.064	4.87358e-08
Lrrc58	4.13691e-11	0.0974658	0.389	0.287	9.36018e-07
Vrk3	8.0507e-12	0.0973028	0.202	0.13	1.82155e-07
Gabarap	6.2794e-08	0.0970779	0.856	0.803	0.00142078
Napg	3.75758e-11	0.0969328	0.216	0.135	8.50189e-07
Traf6	7.54119e-08	0.0968797	0.119	0.071	0.00170627
Lpin1	0.00999002	0.0968339	0.056	0.046	1
Mrpl51	1.73313e-11	0.096829	0.418	0.31	3.92138e-07
Slc39a1	1.98571e-14	0.0964049	0.434	0.322	4.49287e-10
Sh3pxd2b	4.64335e-06	0.0963671	0.381	0.294	0.10506
Vps13c	3.38592e-10	0.0963569	0.201	0.131	7.66099e-06
Ccdc85b	5.18888e-12	0.0962602	0.217	0.139	1.17404e-07
Tpd52l2	1.25042e-14	0.0960581	0.214	0.136	2.82921e-10
Map1lc3b	9.15789e-07	0.0960269	0.599	0.501	0.0207206
Bckdhb	5.18232e-18	0.0960254	0.07	0.022	1.17255e-13
Chst12	1.92332e-19	0.0959735	0.134	0.066	4.35169e-15
Rps27rt	1.05713e-10	0.0959217	0.193	0.123	2.39187e-06
Tlr7	6.52022e-14	0.095906	0.197	0.118	1.47527e-09
Hdac4	2.60405e-07	0.0958513	0.116	0.074	0.00589192
Itgal	7.90428e-18	0.0957055	0.592	0.456	1.78842e-13
Slc44a1	1.11982e-14	0.0955913	0.085	0.036	2.53371e-10
Abhd17c	9.55622e-06	0.0955883	0.078	0.046	0.216219
Slamf6	3.14158e-11	0.0955482	0.131	0.078	7.10814e-07
Rpl24	4.57694e-07	0.0955273	0.922	0.904	0.0103558
Ppme1	6.05241e-10	0.0955267	0.146	0.088	1.36942e-05
Npy	4.43342e-13	0.0951623	0.027	0.004	1.0031e-08
Pigk	5.05258e-15	0.0950184	0.248	0.158	1.1432e-10
Tnfrsf23	1.29157e-10	0.0946185	0.047	0.015	2.92231e-06
Bcar3	0.0101689	0.0945386	0.032	0.023	1
Tnfaip8l3	1.44381e-13	0.0944778	0.058	0.018	3.26676e-09
Lrp1	1.76914e-09	0.0942962	0.453	0.357	4.00285e-05
Plekhm1	5.11611e-08	0.0942576	0.162	0.108	0.00115757
Slamf1	1.3382e-17	0.0938655	0.034	0.003	3.02782e-13
Agfg1	7.08295e-14	0.0935599	0.196	0.123	1.60259e-09
Hsbp1	1.53195e-11	0.0935352	0.446	0.329	3.46618e-07
Adora2b	3.83254e-10	0.0935172	0.074	0.037	8.67151e-06
Pef1	3.16493e-13	0.0934916	0.109	0.053	7.16096e-09
Naip2	6.64157e-13	0.0931142	0.292	0.197	1.50272e-08
Serinc1	5.43429e-10	0.0930173	0.455	0.348	1.22956e-05
Ncf1	2.01035e-11	0.0929589	0.67	0.564	4.54863e-07
Fxyd5	5.32639e-06	0.0926046	0.892	0.855	0.120515
Lepr	0.07698	0.0925604	0.011	0.005	1
Gclc	1.22444e-07	0.0925569	0.121	0.078	0.00277041
Slc15a3	0.000758529	0.0924864	0.707	0.603	1
Rras	1.76815e-12	0.09235	0.192	0.115	4.00062e-08
Mtln	5.70877e-12	0.092281	0.375	0.269	1.29167e-07
Galnt7	3.79151e-11	0.0922328	0.302	0.208	8.57867e-07
4930453N24Rik	1.59948e-13	0.0922131	0.116	0.062	3.61899e-09
Def8	4.59634e-09	0.0921681	0.117	0.066	0.000103997
Maea	3.42118e-09	0.0919763	0.229	0.159	7.74076e-05
Cidec	0.0416083	0.0919672	0.015	0.009	1
Ciapin1	1.0447e-12	0.0919662	0.149	0.094	2.36373e-08
Tnfaip3	0.00262626	0.0918683	0.666	0.576	1
Psme2	1.56963e-07	0.0917904	0.654	0.546	0.00355144
Dexi	5.09179e-15	0.0915934	0.07	0.028	1.15207e-10
Micall2	8.62673e-15	0.0910182	0.054	0.015	1.95188e-10
Ndufa3	2.07585e-12	0.09086	0.459	0.342	4.69681e-08
Plin3	3.02644e-09	0.0908484	0.214	0.144	6.84763e-05
Cisd1	5.18519e-12	0.0906344	0.288	0.189	1.1732e-07
Esyt1	1.6819e-09	0.0903613	0.394	0.298	3.80547e-05
Flvcr1	2.79909e-12	0.0903305	0.108	0.059	6.33323e-08
Ms4a6d	2.65475e-08	0.0902041	0.555	0.43	0.000600663
Rab44	0.000391217	0.0900779	0.014	0.005	1
Ptpn23	1.52901e-07	0.0899784	0.096	0.055	0.00345954
Cmas	4.69253e-11	0.089696	0.158	0.097	1.06173e-06
Btg3	8.04309e-11	0.0896918	0.109	0.06	1.81983e-06
Ccng2	3.15423e-09	0.089573	0.12	0.081	7.13676e-05
Fry	0.000368554	0.0895539	0.04	0.023	1
Car4	0.41046	0.0893836	0.024	0.02	1
Pde4d	6.53647e-10	0.0892412	0.038	0.012	1.47894e-05
P2ry10b	2.22602e-05	0.0889722	0.073	0.047	0.503659
S1pr2	5.71421e-13	0.0888859	0.206	0.127	1.2929e-08
Mocs1	2.49345e-10	0.0888533	0.095	0.049	5.64168e-06
C330007P06Rik	1.18348e-10	0.0885351	0.143	0.083	2.67774e-06
Mrps36	7.91386e-13	0.0884012	0.263	0.174	1.79059e-08
Abhd5	2.68016e-09	0.0883869	0.12	0.073	6.06414e-05
Grcc10	4.75561e-14	0.0879975	0.226	0.144	1.076e-09
Tusc1	5.49897e-13	0.0878829	0.059	0.024	1.2442e-08
Cacna1d	7.22632e-11	0.0877432	0.064	0.027	1.63503e-06
R3hdm1	1.11729e-05	0.0876962	0.225	0.17	0.252799
Krt79	0.964834	0.0874666	0.027	0.027	1
Tspan5	7.86757e-11	0.087426	0.071	0.032	1.78012e-06
Mtmr7	2.13604e-09	0.087398	0.034	0.009	4.833e-05
Ttc3	1.59896e-10	0.0873243	0.107	0.057	3.61782e-06
Nek6	5.36731e-08	0.0871664	0.199	0.137	0.00121441
Mgat4b	1.76806e-07	0.0868858	0.275	0.198	0.00400041
Pet100	5.04439e-10	0.0865863	0.318	0.225	1.14134e-05
Rnpepl1	1.25601e-07	0.0862597	0.239	0.165	0.00284184
Slc7a8	1.30381e-14	0.0862229	0.357	0.254	2.94999e-10
Mindy2	7.35249e-15	0.0861536	0.257	0.166	1.66357e-10
Klhl9	2.81403e-08	0.0860261	0.127	0.076	0.000636703
Sav1	6.55041e-10	0.0858602	0.215	0.141	1.4821e-05
Mag	1.27124e-13	0.0857722	0.128	0.072	2.87632e-09
Zranb3	1.53451e-10	0.0857094	0.059	0.027	3.47199e-06
Klhl21	6.86162e-11	0.0856825	0.065	0.029	1.55251e-06
H2-Q4	0.000317827	0.0854576	0.55	0.456	1
Scpep1	1.86783e-11	0.0853196	0.332	0.239	4.22615e-07
AI413582	1.28555e-07	0.0853042	0.265	0.188	0.00290869
Dhrs7	1.80831e-11	0.0851225	0.245	0.168	4.09149e-07
Pla2g12a	5.01099e-14	0.0850636	0.06	0.019	1.13379e-09
Raph1	6.59669e-08	0.0849555	0.064	0.036	0.00149257
Reep3	1.99792e-09	0.0847979	0.236	0.163	4.5205e-05
Zfand2a	1.3128e-05	0.084688	0.125	0.089	0.297033
Lamc1	2.35515e-13	0.084681	0.058	0.023	5.32875e-09
Lasp1	3.57948e-08	0.0845277	0.473	0.37	0.000809894
Snx27	2.39551e-08	0.0845205	0.142	0.087	0.000542008
Plaur	4.31649e-06	0.0844589	0.388	0.306	0.0976649
Stx11	6.26867e-09	0.0844037	0.146	0.089	0.000141835
Ppp1cc	1.03548e-12	0.0840347	0.246	0.169	2.34287e-08
Apoe	0.000241101	0.0837862	0.799	0.777	1
Exoc2	1.11176e-09	0.0837801	0.135	0.08	2.51547e-05
Atp5j	1.6917e-05	0.0837093	0.666	0.573	0.382763
Sfxn1	5.25798e-10	0.0835694	0.13	0.079	1.18967e-05
Vps37a	1.78236e-08	0.0834984	0.172	0.112	0.000403277
Calu	3.63994e-11	0.0834918	0.262	0.183	8.23573e-07
Blcap	2.37984e-14	0.083377	0.16	0.092	5.38463e-10
Mocs2	1.61393e-14	0.0833383	0.189	0.119	3.65168e-10
Pex11a	3.32638e-15	0.0832341	0.061	0.022	7.52626e-11
Psmd2	4.61887e-05	0.083141	0.521	0.412	1
Adgrl2	1.54354e-09	0.0827777	0.035	0.01	3.49241e-05
Ikbke	3.49076e-08	0.0825476	0.271	0.199	0.00078982
Ss18l2	1.87042e-09	0.0824923	0.093	0.051	4.23201e-05
Gm49368	2.04204e-11	0.0824037	0.047	0.016	4.62031e-07
Ndufa6	1.23848e-06	0.0819343	0.557	0.454	0.0280219
Iigp1	0.00288494	0.0816728	0.488	0.437	1
Pnpla7	4.79029e-09	0.0816553	0.23	0.16	0.000108385
Bcap31	6.91423e-09	0.081418	0.394	0.291	0.000156441
Cenpb	9.38506e-11	0.081238	0.318	0.23	2.12346e-06
Mpnd	2.18571e-10	0.0811526	0.137	0.083	4.94539e-06
Luzp1	1.11905e-06	0.0811198	0.365	0.287	0.0253196
Prelid1	4.38018e-09	0.0806933	0.459	0.353	9.91059e-05
Cyb5r4	3.66435e-10	0.0806402	0.275	0.189	8.29096e-06
Rit1	4.38402e-11	0.0806175	0.233	0.159	9.91929e-07
Large1	4.86018e-11	0.0804724	0.047	0.017	1.09966e-06
Hipk3	9.90991e-12	0.080454	0.204	0.137	2.24222e-07
Sphk1	2.08039e-11	0.0803814	0.026	0.003	4.70708e-07
Slc9a3r1	4.66575e-09	0.080212	0.337	0.254	0.000105567
Cndp2	5.39347e-10	0.0800854	0.598	0.479	1.22033e-05
Nmt2	3.12565e-09	0.0800523	0.091	0.048	7.07209e-05
Ccdc58	6.29602e-11	0.0800141	0.097	0.052	1.42454e-06
Ap2a1	4.96507e-09	0.0798569	0.163	0.101	0.00011234
Cryzl2	3.72344e-15	0.0797721	0.099	0.049	8.42466e-11
Nln	1.32536e-10	0.0797152	0.119	0.069	2.99877e-06
Chst11	2.12332e-07	0.0792031	0.032	0.012	0.00480421
Angptl4	1.86374e-09	0.0791809	0.035	0.013	4.2169e-05
Creld1	1.67386e-12	0.0791478	0.088	0.039	3.78727e-08
Clic5	4.26794e-08	0.0788965	0.049	0.02	0.000965664
Katna1	1.30162e-11	0.078845	0.222	0.145	2.94505e-07
Plcb4	1.41009e-14	0.0787376	0.04	0.009	3.19046e-10
Gpr176	2.2896e-14	0.0786632	0.039	0.008	5.18045e-10
Prorsd1	5.09037e-12	0.0784975	0.108	0.056	1.15175e-07
Fam71f2	9.33097e-13	0.0782898	0.024	0.004	2.11123e-08
Gm21188	3.27179e-07	0.0782699	0.604	0.49	0.00740275
Mthfd1l	2.2773e-11	0.0781162	0.068	0.03	5.15262e-07
Tmed4	4.00536e-15	0.0781029	0.184	0.111	9.06252e-11
Nagk	8.06724e-14	0.0779942	0.195	0.117	1.82529e-09
Spaca9	1.53712e-15	0.0779331	0.066	0.022	3.47789e-11
Hmox2	3.17296e-13	0.0778573	0.294	0.198	7.17914e-09
Bola3	1.47151e-12	0.0778087	0.248	0.163	3.32945e-08
Nub1	1.19153e-09	0.0777696	0.276	0.191	2.69595e-05
Trim29	1.66156e-09	0.0776867	0.029	0.006	3.75946e-05
Fam160a2	4.61683e-11	0.0776672	0.051	0.018	1.0446e-06
Emilin1	5.64742e-10	0.0776365	0.186	0.122	1.27779e-05
Xkr8	4.63755e-13	0.0775278	0.049	0.014	1.04929e-08
Uhrf1bp1l	2.62736e-11	0.0773648	0.144	0.091	5.94467e-07
B4galt7	3.66317e-07	0.0768876	0.081	0.048	0.00828829
Aph1c	1.01725e-08	0.0768116	0.163	0.103	0.000230164
Smim12	8.05504e-13	0.0766529	0.204	0.127	1.82253e-08
Pon3	1.43736e-11	0.076649	0.129	0.072	3.25217e-07
Dnaja1	0.0379117	0.0765997	0.599	0.535	1
Tapbpl	1.5415e-08	0.0764072	0.311	0.22	0.000348779
Rps6kb1	1.30421e-08	0.0763528	0.169	0.112	0.00029509
Golt1b	2.32427e-07	0.0759167	0.112	0.066	0.0052589
Psen2	4.94596e-08	0.0758596	0.421	0.315	0.00111907
Stxbp1	2.60878e-10	0.0758142	0.099	0.053	5.90262e-06
Zyx	5.0654e-06	0.0758008	0.505	0.413	0.11461
Cdkn1a	0.0246968	0.0757593	0.603	0.529	1
Dgkz	1.64469e-05	0.0755323	0.106	0.073	0.372127
Arfgap3	1.25606e-11	0.0753739	0.092	0.049	2.84196e-07
Eid3	0.000850378	0.075258	0.056	0.037	1
Impa2	1.19189e-12	0.0751188	0.11	0.056	2.69676e-08
Trub2	8.49926e-06	0.0750386	0.07	0.041	0.192304
Tmem50a	5.92154e-07	0.0748762	0.702	0.6	0.0133981
Abcd2	5.62056e-05	0.0747669	0.053	0.026	1
Ndufs3	1.57813e-09	0.0745777	0.433	0.329	3.57067e-05
Wipi1	5.56003e-11	0.0745548	0.054	0.02	1.25801e-06
Akirin1	8.9903e-10	0.0744895	0.265	0.188	2.03415e-05
0610009B22Rik	2.14811e-14	0.0744837	0.108	0.056	4.86032e-10
Ercc6	0.0054118	0.0744217	0.049	0.028	1
Cited2	0.000201829	0.0742954	0.317	0.262	1
Cast	6.02822e-09	0.0741922	0.293	0.213	0.000136395
Lpl	7.76334e-08	0.0741304	0.376	0.286	0.00175653
Galk1	3.37925e-11	0.0740334	0.137	0.083	7.6459e-07
Heatr6	4.10067e-10	0.0736883	0.105	0.059	9.27819e-06
Tacstd2	2.85895e-13	0.0736345	0.038	0.009	6.46866e-09
Tm9sf2	4.66937e-12	0.0736218	0.285	0.199	1.05649e-07
Mmp8	4.73377e-07	0.0735703	0.023	0.006	0.0107106
Elmod2	1.63773e-05	0.0735161	0.092	0.057	0.370554
Ptch1	1.06744e-09	0.0733957	0.044	0.015	2.41519e-05
Tfpi	2.77929e-12	0.0733763	0.064	0.025	6.28841e-08
Il27	1.77292e-09	0.0733015	0.112	0.063	4.01141e-05
Rrs1	2.86469e-10	0.0732509	0.082	0.044	6.48165e-06
Agpat5	1.16147e-11	0.0732434	0.252	0.165	2.62793e-07
H6pd	3.38811e-10	0.072936	0.139	0.082	7.66594e-06
Zdhhc20	1.27833e-11	0.0729197	0.223	0.14	2.89235e-07
Fstl1	1.31435e-09	0.0725767	0.021	0.003	2.97385e-05
Slc36a1	9.78719e-11	0.0725355	0.11	0.066	2.21445e-06
Uap1	7.20665e-07	0.072337	0.185	0.127	0.0163058
Tmed8	2.60258e-11	0.0722457	0.08	0.038	5.88859e-07
Tnfsf15	3.47418e-08	0.0721559	0.039	0.013	0.000786067
Ubxn8	1.1893e-07	0.0720991	0.072	0.032	0.00269091
Appl2	1.35399e-09	0.0714693	0.074	0.036	3.06355e-05
Ankrd37	5.49477e-06	0.0713396	0.051	0.023	0.124325
Atp2a2	2.27357e-06	0.0712282	0.31	0.233	0.0514419
Sypl	7.21938e-09	0.0710689	0.301	0.213	0.000163346
Tmem178	4.11274e-11	0.0710585	0.025	0.003	9.30549e-07
Ube2m	4.04126e-09	0.0709409	0.349	0.261	9.14376e-05
Nol4l	1.16642e-05	0.0707049	0.042	0.022	0.263914
Fkbp8	3.72731e-10	0.0703061	0.413	0.314	8.4334e-06
Micall1	9.59519e-05	0.0702276	0.052	0.029	1
Filip1l	7.17296e-07	0.0701029	0.236	0.169	0.0162295
Slc41a2	5.85552e-10	0.0699694	0.063	0.028	1.32487e-05
Tm2d1	8.86815e-08	0.069843	0.232	0.163	0.00200651
Tmem259	4.49428e-08	0.0698305	0.301	0.224	0.00101688
Ndufa7	0.000213342	0.0696591	0.566	0.474	1
Dcun1d3	9.85787e-08	0.0694403	0.044	0.017	0.00223044
Ets2	0.00054996	0.0694282	0.486	0.415	1
Thap4	3.10536e-07	0.0694077	0.063	0.031	0.00702619
Rnaset2a	9.75353e-12	0.0694063	0.077	0.036	2.20683e-07
Tmem170b	2.44916e-09	0.0691241	0.12	0.071	5.54146e-05
Slc12a4	3.61652e-09	0.0691045	0.096	0.056	8.18275e-05
Ankrd28	8.45978e-12	0.0689101	0.066	0.035	1.91411e-07
Nrg1	0.000606899	0.068813	0.096	0.072	1
Ndst1	2.74867e-10	0.0682274	0.169	0.103	6.21913e-06
Atg7	1.65943e-08	0.0681332	0.158	0.099	0.000375463
Aatk	9.32777e-07	0.0680553	0.052	0.025	0.021105
Nectin2	1.09841e-11	0.0679217	0.076	0.036	2.48525e-07
Wdr62	3.26128e-11	0.0678503	0.058	0.026	7.37898e-07
9130230L23Rik	3.60574e-06	0.0677806	0.039	0.02	0.0815835
Tmem256	6.82971e-06	0.0676797	0.673	0.58	0.154529
B4galt1	1.253e-06	0.0675996	0.299	0.228	0.0283504
Dvl1	2.45637e-08	0.067591	0.059	0.034	0.000555778
Mettl6	1.2689e-05	0.0675049	0.105	0.069	0.287102
Cds2	7.0799e-13	0.0675013	0.116	0.068	1.6019e-08
Tmem104	2.82533e-13	0.0673623	0.157	0.098	6.39258e-09
Adam9	2.23917e-10	0.0673376	0.211	0.142	5.06635e-06
Tmco3	7.944e-10	0.0672083	0.117	0.072	1.79741e-05
Uap1l1	7.74254e-08	0.0670587	0.341	0.262	0.00175183
Herc6	3.85075e-12	0.06704	0.23	0.151	8.71272e-08
Fpr1	4.83072e-06	0.066576	0.029	0.011	0.1093
Tmem199	5.63558e-08	0.0663453	0.088	0.049	0.00127511
Klc4	9.11376e-07	0.0661983	0.118	0.07	0.0206208
Oasl2	2.21525e-09	0.0661794	0.322	0.231	5.01223e-05
Zcchc4	1.20518e-10	0.0660057	0.057	0.025	2.72684e-06
Mtpn	6.15686e-10	0.0659858	0.529	0.425	1.39305e-05
Narf	1.84812e-11	0.0659826	0.111	0.061	4.18157e-07
Vezt	1.59995e-08	0.0659624	0.065	0.032	0.000362005
Sacm1l	3.19398e-08	0.0659403	0.112	0.065	0.00072267
Bin1	8.12007e-11	0.0657964	0.359	0.264	1.83725e-06
Tmem120a	2.4312e-07	0.065653	0.105	0.069	0.00550084
Dnajc1	8.6167e-09	0.065458	0.243	0.172	0.000194961
Cplx2	2.36046e-12	0.0654548	0.036	0.005	5.34077e-08
Smcr8	3.04296e-07	0.0652108	0.087	0.053	0.00688501
Ube2z	1.16154e-07	0.0651893	0.275	0.206	0.00262809
Gpr155	6.98583e-11	0.0651254	0.074	0.037	1.58061e-06
Idnk	9.86081e-11	0.0650612	0.374	0.278	2.23111e-06
Piga	0.000104489	0.0650554	0.051	0.031	1
Agl	1.50022e-09	0.0649014	0.063	0.029	3.39441e-05
Ppard	2.61108e-11	0.0647179	0.117	0.068	5.90784e-07
Sdf2	9.66665e-08	0.0646574	0.296	0.212	0.00218718
Tbc1d9b	3.85271e-11	0.0643267	0.154	0.09	8.71714e-07
Wdr7	9.86131e-07	0.0643055	0.069	0.039	0.0223122
Vdr	1.41017e-12	0.0642317	0.143	0.087	3.19065e-08
Tmcc1	6.44456e-08	0.0640933	0.214	0.152	0.00145815
Lrrc75a	1.48993e-12	0.0640007	0.039	0.01	3.37111e-08
Gramd1b	1.21666e-09	0.0636486	0.099	0.062	2.75283e-05
Bbs10	2.13485e-05	0.0635692	0.023	0.01	0.483031
4933430I17Rik	8.47574e-15	0.0634966	0.036	0.005	1.91772e-10
Etv1	1.09386e-08	0.0633672	0.036	0.01	0.000247496
Vwf	0.00276271	0.0632833	0.037	0.021	1
Cnpy2	9.47519e-09	0.0632201	0.371	0.282	0.000214386
Slamf7	3.29034e-07	0.0632086	0.643	0.532	0.00744472
Edn1	0.0467406	0.0631297	0.019	0.027	1
Cpeb2	0.000463739	0.0630391	0.158	0.126	1
St6galnac4	9.64052e-09	0.0628332	0.251	0.172	0.000218126
Prnp	3.9997e-09	0.062826	0.049	0.017	9.04972e-05
Il18	0.00503794	0.062671	0.092	0.067	1
Sil1	4.47854e-12	0.0625532	0.173	0.103	1.01332e-07
Cdyl	9.66282e-08	0.0625288	0.052	0.027	0.00218631
Gdf15	0.500796	0.0623723	0.127	0.132	1
Lars2	0.0798901	0.0622543	0.963	0.936	1
Slc3a2	0.00203655	0.0622441	0.701	0.602	1
Slc25a16	1.02159e-09	0.0621746	0.071	0.033	2.31146e-05
Ltbr	2.19966e-07	0.0621291	0.245	0.181	0.00497696
Gmfb	1.40232e-07	0.0620073	0.308	0.226	0.00317289
Plk3	0.901516	0.0620006	0.284	0.276	1
Orai2	8.80605e-10	0.0619642	0.122	0.072	1.99246e-05
Tollip	5.1995e-10	0.0618776	0.209	0.142	1.17644e-05
Camta2	1.56601e-08	0.0618397	0.276	0.203	0.000354325
Clcn5	1.94478e-06	0.0615689	0.074	0.042	0.0440026
Dgat2	7.88327e-05	0.0614157	0.081	0.049	1
Mpst	3.01202e-11	0.0613594	0.108	0.058	6.81499e-07
Sra1	7.01969e-11	0.0613062	0.264	0.185	1.58827e-06
Eif4ebp1	1.37413e-08	0.061303	0.34	0.257	0.00031091
Phf1	0.000116346	0.0612081	0.061	0.037	1
Il12rb2	5.0956e-11	0.0609732	0.035	0.009	1.15293e-06
Wdtc1	3.63011e-11	0.0607767	0.083	0.044	8.21349e-07
Atrn	2.52613e-07	0.0607091	0.076	0.044	0.00571562
Tnfsf9	9.67767e-06	0.0606585	0.078	0.051	0.218967
Gm2000	5.8672e-07	0.0606552	0.153	0.102	0.0132751
Hes6	2.42677e-08	0.060598	0.126	0.079	0.00054908
Dusp28	1.02355e-07	0.0605396	0.076	0.04	0.00231588
Galm	2.28255e-07	0.0602633	0.042	0.018	0.00516451
Rabac1	1.03367e-06	0.0602603	0.6	0.5	0.0233878
Slc39a2	9.49988e-10	0.0602495	0.025	0.005	2.14944e-05
Lrrc27	2.06913e-16	0.0601695	0.035	0.004	4.68161e-12
Akip1	1.43732e-11	0.0601691	0.074	0.036	3.25208e-07
Bet1	1.6918e-08	0.0601009	0.169	0.112	0.000382787
Actn4	2.7677e-07	0.0598391	0.302	0.227	0.0062622
Clpp	2.54748e-10	0.0597443	0.142	0.09	5.76394e-06
Rab13	6.29227e-08	0.0594583	0.094	0.055	0.00142369
Trip13	2.08419e-10	0.0593131	0.038	0.011	4.71568e-06
Ppm1b	7.76341e-06	0.0593046	0.108	0.069	0.175655
Fyttd1	4.54471e-08	0.0591598	0.151	0.109	0.00102829
Ap5b1	8.50977e-09	0.0590511	0.035	0.011	0.000192542
Pi4k2a	1.93801e-08	0.0590427	0.314	0.234	0.000438493
Pik3ca	3.11062e-08	0.0589067	0.12	0.075	0.000703809
Ell	3.45323e-05	0.0588496	0.065	0.042	0.781327
Fam32a	4.09933e-09	0.0588404	0.36	0.267	9.27514e-05
Ppp1r3b	3.62436e-07	0.058839	0.041	0.016	0.00820048
Pcgf3	4.90559e-07	0.0587471	0.074	0.043	0.0110994
Ginm1	4.93389e-09	0.0586407	0.104	0.062	0.000111634
Sdf4	1.19176e-08	0.0585249	0.462	0.36	0.000269648
Clmn	0.0737531	0.0584356	0.017	0.009	1
Rab24	1.64301e-06	0.0583229	0.256	0.19	0.0371747
Mgarp	1.75562e-12	0.058306	0.025	0.003	3.97227e-08
Usp31	1.0145e-08	0.058248	0.05	0.025	0.00022954
Stard5	4.53056e-06	0.0582062	0.104	0.069	0.102508
Slc6a19	5.978e-11	0.0577809	0.028	0.004	1.35258e-06
Afdn	3.57503e-11	0.0577007	0.103	0.059	8.08887e-07
Apmap	4.65237e-08	0.0576449	0.127	0.078	0.00105265
Rnf19a	4.71707e-07	0.0574986	0.097	0.059	0.0106728
Dap	1.35623e-08	0.0574398	0.28	0.202	0.000306861
Parvb	9.46696e-06	0.0572799	0.158	0.113	0.214199
Ube2q2	2.88938e-10	0.057253	0.136	0.085	6.53751e-06
Smpd1	3.15244e-10	0.0571855	0.09	0.05	7.13272e-06
Sfmbt1	1.7901e-08	0.0571075	0.078	0.044	0.000405027
Smpd5	6.76785e-10	0.0570864	0.026	0.005	1.53129e-05
Pgrmc2	1.28553e-08	0.0569976	0.129	0.077	0.000290865
Il23a	0.000898044	0.0569466	0.017	0.006	1
Mboat7	1.63654e-12	0.0568937	0.11	0.058	3.70283e-08
Tgm2	9.29356e-10	0.0568227	0.757	0.65	2.10276e-05
Ndufaf3	6.45768e-09	0.0567026	0.151	0.095	0.000146112
Inpp5j	5.22689e-10	0.0566992	0.063	0.032	1.18264e-05
Alg1	6.44294e-07	0.0565821	0.121	0.073	0.0145778
Pusl1	4.31349e-11	0.0564848	0.05	0.019	9.75971e-07
Hyal2	5.5597e-11	0.0564598	0.05	0.018	1.25794e-06
Mrpl27	9.44979e-08	0.0564538	0.217	0.148	0.00213811
Akap7	2.40326e-06	0.0562352	0.048	0.021	0.0543761
Fcho1	5.72469e-07	0.0562198	0.077	0.043	0.0129527
Ganab	1.23736e-06	0.0562035	0.233	0.167	0.0279966
St6galnac6	8.24711e-08	0.0561761	0.095	0.06	0.00186599
Insr	1.02795e-06	0.0561537	0.066	0.033	0.0232584
Golga4	2.32944e-06	0.0560631	0.286	0.217	0.0527058
Atp9b	2.83022e-07	0.056034	0.193	0.14	0.00640366
Adprm	3.27054e-06	0.0560327	0.087	0.05	0.0739992
Dctn4	0.000148836	0.0559152	0.24	0.189	1
Dcstamp	1.87103e-05	0.0559027	0.074	0.047	0.423339
Trib3	2.11631e-06	0.0558972	0.019	0.005	0.0478836
Ifi205	6.89591e-09	0.0556311	0.134	0.086	0.000156027
Acadsb	3.62404e-06	0.0553363	0.095	0.058	0.0819975
Atrnl1	7.50974e-06	0.0552795	0.06	0.034	0.169915
Homer3	3.81384e-11	0.0552658	0.049	0.022	8.6292e-07
2023-09-08	8.39441e-06	0.0552407	0.081	0.049	0.189932
Timm8a1	5.41901e-11	0.0549876	0.111	0.062	1.22611e-06
Pon2	3.38414e-07	0.0549717	0.308	0.228	0.00765696
Mindy1	0.000152259	0.0549052	0.087	0.057	1
Ift57	6.85204e-08	0.0548496	0.103	0.059	0.00155034
Ccdc125	8.20781e-09	0.0548412	0.029	0.008	0.00018571
C2cd2l	1.43575e-06	0.0547472	0.094	0.058	0.0324853
Epb41l3	3.69814e-11	0.0546386	0.043	0.016	8.36741e-07
Slc27a4	7.54902e-09	0.0545714	0.073	0.043	0.000170804
F3	1.20552e-07	0.054542	0.027	0.012	0.00272761
Csta2	6.7704e-07	0.0544655	0.01	0.001	0.0153187
Gpr137	0.00014785	0.0544614	0.122	0.083	1
Rcbtb1	2.26286e-07	0.0543835	0.078	0.043	0.00511994
Impad1	1.512e-05	0.05438	0.12	0.08	0.342105
Smco4	1.39333e-10	0.0543534	0.043	0.013	3.15255e-06
Mcoln1	1.08078e-05	0.0543234	0.063	0.035	0.244537
Hnrnph3	1.35366e-05	0.0542975	0.14	0.101	0.30628
Unc50	4.73868e-08	0.0541657	0.178	0.116	0.00107217
Fam214b	2.29634e-07	0.0541552	0.119	0.074	0.00519569
Cep70	0.000198446	0.0541188	0.061	0.036	1
Pip4k2c	8.95973e-07	0.0541007	0.143	0.095	0.0202723
Naxd	7.64387e-08	0.0540675	0.174	0.122	0.0017295
Senp5	1.07962e-05	0.0540509	0.09	0.056	0.244274
Fkbpl	2.49799e-08	0.0539692	0.042	0.017	0.000565195
Ndufb2	1.18144e-08	0.0539016	0.385	0.297	0.000267314
Pgrmc1	7.83478e-15	0.053883	0.219	0.14	1.7727e-10
Haghl	1.10655e-07	0.0537496	0.114	0.072	0.00250369
Lman1	3.18187e-09	0.0537425	0.262	0.189	7.19931e-05
Gstm2	1.71522e-12	0.0536059	0.028	0.004	3.88085e-08
Slc9a4	0.0428461	0.0536033	0.012	0.005	1
Ebi3	5.19572e-11	0.0535549	0.113	0.064	1.17558e-06
Lzts2	1.19727e-10	0.0534726	0.04	0.013	2.70895e-06
Gzf1	7.8978e-05	0.0534196	0.069	0.045	1
Phgdh	0.000468626	0.0533792	0.019	0.008	1
Htr7	5.58292e-12	0.0533661	0.061	0.026	1.26319e-07
E330009J07Rik	1.8346e-05	0.0533274	0.024	0.007	0.415095
Adarb1	0.481484	0.0532936	0.017	0.014	1
Acaa1b	0.0332556	0.0532566	0.006	0.004	1
Tmem154	4.49635e-06	0.0532044	0.032	0.012	0.101734
Slc25a39	1.62151e-05	0.053093	0.202	0.148	0.366882
Slc9a1	1.57963e-07	0.0529397	0.113	0.068	0.00357407
Lsmem1	0.00247911	0.0528352	0.092	0.075	1
Rmdn3	4.19124e-08	0.0528181	0.178	0.114	0.00094831
Abhd18	1.33258e-10	0.0528153	0.027	0.007	3.01509e-06
Fam192a	2.87867e-10	0.0527915	0.211	0.148	6.51328e-06
Gpalpp1	2.31641e-06	0.0527532	0.176	0.117	0.0524111
Pfkfb3	3.31844e-07	0.0527208	0.326	0.246	0.00750831
Plcl2	1.2122e-07	0.0525983	0.144	0.093	0.00274271
Slc25a4	2.65332e-08	0.052498	0.355	0.26	0.000600341
B3gnt3	1.17948e-09	0.0523283	0.044	0.016	2.66869e-05
Dapk2	1.37146e-12	0.052302	0.023	0.001	3.10305e-08
Fam104a	1.47687e-07	0.0521924	0.38	0.285	0.00334157
Pigp	7.22087e-10	0.0519194	0.098	0.054	1.63379e-05
Tnfrsf21	9.25062e-08	0.0519051	0.193	0.134	0.00209305
Brd2	0.0053688	0.0517585	0.672	0.589	1
Tmem43	6.02178e-08	0.051734	0.138	0.096	0.00136249
Txndc17	0.000165539	0.0516858	0.547	0.469	1
Alpk2	0.00017236	0.0515914	0.02	0.007	1
Zwint	2.35236e-05	0.0515648	0.126	0.082	0.532245
Plekhb2	1.20261e-09	0.0515092	0.324	0.231	2.72101e-05
Map4k4	5.63061e-05	0.0514669	0.428	0.347	1
Miga1	1.04885e-08	0.0514487	0.039	0.013	0.000237312
Lrrfip2	3.09208e-05	0.051395	0.238	0.185	0.699614
Cpne2	5.50962e-11	0.0513603	0.208	0.139	1.24661e-06
Pbdc1	2.01891e-05	0.0511731	0.186	0.129	0.456798
Scnm1	9.48449e-07	0.0511152	0.061	0.032	0.0214596
Hibadh	2.62462e-09	0.0509326	0.202	0.141	5.93847e-05
Tcf25	0.000122742	0.0507747	0.605	0.509	1
Timm29	5.59332e-07	0.0507512	0.09	0.054	0.0126554
Raf1	5.27812e-06	0.0506324	0.29	0.222	0.119423
Sema4a	1.69673e-10	0.0506039	0.465	0.362	3.83901e-06
Camp	2.47279e-10	0.050455	0.022	0.002	5.59494e-06
Sel1l	3.34401e-06	0.0504049	0.218	0.156	0.0756616
Sh2b2	7.47343e-08	0.0503957	0.06	0.033	0.00169094
Lamtor4	0.000224726	0.0503346	0.724	0.643	1
1700003F12Rik	3.11172e-09	0.050232	0.03	0.007	7.04058e-05
Kif3a	5.46199e-06	0.0501748	0.06	0.033	0.123583
Socs2	0.00381135	0.0501427	0.034	0.02	1
Ctnnd1	1.77008e-05	0.0499223	0.153	0.112	0.400499
Zswim7	9.50652e-08	0.0498181	0.084	0.044	0.00215095
Palld	1.69458e-09	0.0497717	0.07	0.034	3.83416e-05
Hmga1	5.49743e-07	0.0497441	0.121	0.077	0.0124385
Napepld	3.44409e-06	0.0495398	0.027	0.009	0.077926
Atp6v1d	3.1127e-09	0.0495104	0.386	0.295	7.04278e-05
Fbxl14	1.08178e-08	0.0494819	0.107	0.069	0.000244763
Vps11	1.55992e-05	0.0494487	0.143	0.102	0.352948
Pnpla2	3.33001e-08	0.0493716	0.247	0.174	0.000753447
Zfp654	7.00636e-06	0.0493685	0.078	0.049	0.158526
Whamm	1.08958e-09	0.0493675	0.08	0.042	2.46529e-05
Aco2	6.45597e-08	0.0493201	0.384	0.301	0.00146073
Apba1	5.91817e-06	0.0492071	0.033	0.015	0.133905
Spin1	4.1982e-08	0.0491532	0.121	0.081	0.000949886
Msmo1	4.3733e-06	0.0491166	0.129	0.087	0.0989503
Esyt2	1.06468e-08	0.0491006	0.171	0.114	0.000240895
Hspbap1	0.00060319	0.0489174	0.044	0.024	1
Hectd4	1.16764e-06	0.048872	0.076	0.044	0.026419
Slc44a2	3.94853e-07	0.0488587	0.111	0.069	0.00893394
Ptger2	1.019e-07	0.0488474	0.049	0.022	0.00230558
mt-Nd6	2.68736e-05	0.0488069	0.055	0.029	0.608043
Coq10a	3.18713e-07	0.0487589	0.071	0.038	0.0072112
Aqp9	5.71456e-06	0.048738	0.023	0.007	0.129298
G6pdx	2.23005e-06	0.0486482	0.127	0.085	0.0504572
Bbx	3.12878e-06	0.0485782	0.211	0.154	0.0707918
Cipc	1.05283e-05	0.0484399	0.056	0.03	0.238214
Tex2	0.000158677	0.048316	0.078	0.047	1
Dusp4	0.000132325	0.0482755	0.015	0.004	1
Tmed1	6.00955e-07	0.0482388	0.114	0.072	0.0135972
Tshz1	2.45898e-06	0.0481895	0.064	0.035	0.0556368
Lpcat3	1.54984e-05	0.0480929	0.136	0.093	0.350666
Krt19	0.555076	0.0479353	0.011	0.01	1
Ralgapa2	0.0008251	0.0478375	0.058	0.036	1
G0s2	0.486473	0.0478336	0.015	0.013	1
Aak1	1.76502e-05	0.0477544	0.089	0.06	0.399353
Atn1	3.75871e-07	0.0475871	0.091	0.054	0.00850446
Mllt6	1.78112e-07	0.0475085	0.199	0.145	0.00402997
N4bp3	5.29763e-10	0.0474808	0.026	0.005	1.19864e-05
Dnajc5	0.000119472	0.0473898	0.302	0.232	1
Ebpl	4.19399e-11	0.0473842	0.225	0.161	9.48932e-07
Wbp1l	4.80782e-08	0.0471775	0.219	0.154	0.00108782
Atp5md	6.59529e-07	0.0471611	0.567	0.468	0.0149225
Cavin4	6.97246e-08	0.0471077	0.019	0.002	0.00157759
Ergic3	1.50414e-09	0.0470432	0.289	0.205	3.40327e-05
D230025D16Rik	4.28072e-05	0.0469808	0.041	0.024	0.968556
Rmc1	3.03442e-06	0.0469219	0.091	0.058	0.0686567
Tusc3	4.05637e-06	0.0468763	0.095	0.06	0.0917793
Il20rb	0.00044717	0.0468318	0.016	0.004	1
Serpine1	0.000275653	0.0467973	0.131	0.099	1
Arfgef2	0.000140649	0.046766	0.11	0.074	1
Snhg11	3.37386e-05	0.0467525	0.014	0.003	0.763369
Csnk1g1	0.000557444	0.046721	0.105	0.076	1
Slc30a7	2.10224e-05	0.0466377	0.129	0.087	0.475652
Igf2bp2	3.05411e-06	0.0466122	0.022	0.01	0.0691022
Sacs	4.15256e-05	0.0465672	0.033	0.014	0.939559
Cdk5	3.75554e-09	0.0465387	0.088	0.051	8.49729e-05
Kctd9	8.13471e-07	0.0465317	0.04	0.018	0.0184056
Uhrf1bp1	3.6875e-10	0.0465212	0.108	0.061	8.34334e-06
C1galt1c1	2.74239e-05	0.0464154	0.078	0.047	0.620494
Ubap1	3.72718e-07	0.0464005	0.17	0.116	0.00843311
Prmt2	6.56388e-06	0.0462967	0.062	0.036	0.148514
Sec62	0.00100728	0.0462776	0.445	0.362	1
Hmg20b	3.12836e-05	0.046228	0.221	0.168	0.707822
4932438A13Rik	6.56277e-07	0.0461798	0.205	0.148	0.0148489
Eif2ak4	2.58296e-06	0.0461497	0.088	0.057	0.0584421
Slc37a4	5.53232e-06	0.0461433	0.047	0.025	0.125174
Mrps6	0.00322683	0.046118	0.092	0.07	1
Slc6a13	3.64286e-12	0.0460706	0.021	0.001	8.24234e-08
Qdpr	3.69701e-06	0.0460342	0.191	0.136	0.0836486
Abcd3	1.45873e-06	0.0459453	0.084	0.053	0.0330053
Trappc6b	4.15464e-09	0.0459293	0.285	0.204	9.40028e-05
Lyrm2	4.54992e-07	0.0458632	0.123	0.083	0.0102947
Areg	0.285489	0.0458388	0.014	0.012	1
Zfp260	2.35579e-05	0.0458196	0.04	0.021	0.53302
Klhl2	8.47994e-06	0.0457795	0.089	0.058	0.191867
Rcbtb2	1.27737e-07	0.0457772	0.193	0.136	0.00289017
Atg12	2.12081e-07	0.0457653	0.175	0.113	0.00479854
Usp5	1.73465e-07	0.0457643	0.217	0.153	0.00392482
Thbd	0.0536766	0.0457542	0.016	0.01	1
Tom1	1.05286e-06	0.0457056	0.123	0.083	0.0238221
Zfp568	2.55976e-06	0.0456537	0.038	0.018	0.0579171
Ccne1	2.35575e-10	0.0455618	0.031	0.01	5.33012e-06
Scyl1	4.43174e-07	0.045561	0.162	0.105	0.0100273
Rpl10-ps3	2.34396e-06	0.0454309	0.141	0.094	0.0530345
Daam1	0.00135102	0.0452938	0.116	0.093	1
Nrg4	0.0479494	0.045257	0.009	0.004	1
Gpr68	3.11609e-07	0.0451918	0.02	0.005	0.00705046
Cdipt	5.0397e-08	0.0450946	0.316	0.233	0.00114028
Crat	1.07109e-07	0.0450444	0.101	0.065	0.00242345
Dynlt3	4.83406e-13	0.0449668	0.213	0.137	1.09376e-08
Mfsd13a	2.32061e-06	0.044964	0.078	0.047	0.0525061
Homer1	0.0030327	0.0449226	0.111	0.082	1
Spryd7	1.02758e-08	0.0449199	0.089	0.053	0.000232499
Anapc4	1.28715e-06	0.0448611	0.121	0.076	0.0291231
Clec16a	1.06556e-05	0.0448405	0.048	0.025	0.241094
Cant1	7.37918e-05	0.0448347	0.232	0.175	1
Srgap1	2.63534e-11	0.0447452	0.017	0	5.96271e-07
Zfp992	0.00010967	0.0447143	0.118	0.083	1
Rsph9	3.59903e-10	0.0446989	0.024	0.004	8.14317e-06
Alg9	1.74755e-05	0.0446709	0.079	0.048	0.3954
Ints12	0.000115593	0.0446193	0.114	0.082	1
Ikbip	3.93615e-09	0.0446146	0.064	0.035	8.90594e-05
Pold3	0.000167687	0.0445385	0.133	0.096	1
Vasn	9.55916e-06	0.0444287	0.018	0.004	0.216286
Gipc1	0.000534199	0.0444157	0.121	0.081	1
Rbm7	1.4123e-06	0.0443962	0.307	0.232	0.0319546
Slc38a7	0.000146683	0.0443941	0.08	0.049	1
Rbm28	0.000661794	0.0443007	0.17	0.13	1
Tlr4	5.0691e-08	0.0442115	0.117	0.077	0.00114694
Rnf10	1.02008e-06	0.0441935	0.171	0.121	0.0230803
B3gnt7	0.000625788	0.0441235	0.02	0.011	1
Zfp281	5.87597e-05	0.0441194	0.091	0.064	1
Rpe	2.19238e-08	0.0441148	0.176	0.118	0.000496047
Sec24b	0.000545708	0.0440466	0.196	0.146	1
Ksr2	7.4121e-07	0.0440279	0.022	0.005	0.0167706
Hspe1-rs1	5.32783e-08	0.0439106	0.103	0.063	0.00120548
Zadh2	2.73305e-06	0.0438698	0.035	0.013	0.0618379
Emc1	1.51698e-06	0.0438168	0.241	0.177	0.0343233
Zbtb4	1.69571e-09	0.0437439	0.08	0.046	3.83671e-05
Pigq	3.09826e-06	0.0437379	0.062	0.039	0.0701013
Nudcd2	6.88569e-05	0.0436713	0.17	0.125	1
Tulp4	1.74757e-06	0.0435499	0.2	0.15	0.0395405
Sgms1	0.000729257	0.0432874	0.154	0.12	1
Gramd4	0.152718	0.0432439	0.043	0.031	1
Uqcrq	0.000390717	0.0431809	0.766	0.682	1
Odf2	8.00356e-05	0.0431548	0.094	0.067	1
Ogfod2	9.59729e-06	0.0431217	0.056	0.03	0.217148
Rnf11	5.68201e-06	0.0431159	0.119	0.075	0.128561
Card9	0.00300638	0.0430697	0.049	0.03	1
Araf	5.16791e-07	0.0429995	0.113	0.076	0.0116929
1600014C10Rik	1.52681e-08	0.0428616	0.264	0.186	0.000345456
Impact	9.2986e-07	0.0428476	0.206	0.152	0.021039
Yme1l1	5.18637e-07	0.0427811	0.192	0.138	0.0117347
Layn	2.08986e-09	0.0426131	0.029	0.008	4.72851e-05
Tmem223	2.59862e-07	0.042575	0.111	0.072	0.00587963
Nat9	1.51691e-07	0.0425739	0.159	0.107	0.00343217
Tmem82	1.55856e-06	0.042569	0.025	0.007	0.035264
Edf1	1.06256e-07	0.0424972	0.52	0.413	0.00240414
Cox7a2l	0.000680376	0.0424926	0.737	0.676	1
Notch1	1.87025e-10	0.0424376	0.184	0.123	4.23163e-06
Ccdc6	8.15325e-08	0.042396	0.098	0.063	0.00184475
Eno1b	5.38572e-08	0.0423361	0.023	0.006	0.00121857
Capn15	0.00050724	0.04224	0.09	0.058	1
Tmem185b	0.00234539	0.0422143	0.074	0.05	1
Rnaseh2c	7.20255e-10	0.0421682	0.385	0.29	1.62965e-05
Nufip1	0.000160548	0.0421196	0.167	0.122	1
Mospd1	5.11862e-06	0.0420676	0.057	0.032	0.115814
Agpat1	8.90893e-05	0.0420439	0.104	0.07	1
Ahi1	1.84231e-07	0.0420349	0.038	0.017	0.0041684
Slc39a7	7.40275e-08	0.0419317	0.326	0.247	0.00167495
Insig2	6.45665e-07	0.0419112	0.087	0.051	0.0146088
Atp5l	0.0350808	0.041899	0.881	0.837	1
Rab22a	1.41383e-06	0.0418843	0.177	0.127	0.0319894
Fam3c	4.84428e-06	0.0418463	0.199	0.14	0.109607
Zfp523	0.00473857	0.0418454	0.052	0.031	1
Idua	2.51277e-06	0.0418376	0.08	0.05	0.0568539
Ear2	0.404369	0.0417661	0.026	0.029	1
Spns1	5.0498e-05	0.0417539	0.149	0.106	1
Spsb4	1.07734e-08	0.0417161	0.017	0.002	0.000243758
Hist3h2a	1.23352e-08	0.0414842	0.104	0.06	0.000279097
Cln3	8.72703e-07	0.0414234	0.181	0.129	0.0197458
Hba-a1	0.0507397	0.0413916	0.011	0.007	1
Enpp1	6.46737e-07	0.0412618	0.018	0.006	0.0146331
Armh3	0.000344075	0.0412271	0.043	0.026	1
Tti2	6.93552e-06	0.0411596	0.034	0.014	0.156923
Stx1b	2.97476e-07	0.0411368	0.026	0.01	0.00673069
Fcnb	3.87495e-08	0.0411299	0.015	0.001	0.000876746
Vnn3	9.12069e-09	0.0410844	0.039	0.015	0.000206365
Erc1	4.67481e-07	0.041017	0.043	0.019	0.0105772
Arrdc3	0.015541	0.0410045	0.096	0.076	1
Atg2b	0.000160653	0.0409956	0.059	0.038	1
Hspa13	3.17882e-09	0.0409247	0.121	0.074	7.1924e-05
Evi5	7.33564e-06	0.0409122	0.105	0.067	0.165976
Klhl25	0.000500841	0.0408131	0.037	0.022	1
Crtap	3.37314e-08	0.0407493	0.047	0.023	0.000763206
Swi5	0.000111296	0.0407251	0.532	0.443	1
Rph3a	5.25276e-08	0.0407136	0.021	0.004	0.00118849
Tbc1d23	0.00404928	0.0406307	0.099	0.076	1
Snx12	9.26388e-05	0.0406211	0.215	0.153	1
Ip6k3	2.31603e-06	0.0406199	0.037	0.016	0.0524024
Rnf24	0.000249099	0.040594	0.026	0.013	1
Ccz1	3.12594e-06	0.0405715	0.207	0.154	0.0707275
Gtpbp2	1.56035e-07	0.0404819	0.2	0.146	0.00353045
Prrc2b	3.59976e-07	0.040476	0.167	0.119	0.00814481
Rspry1	2.62565e-07	0.0403979	0.124	0.08	0.00594079
Aars	0.000848753	0.0403957	0.181	0.135	1
P3h1	8.36033e-05	0.0403923	0.061	0.033	1
Eif4b	3.29442e-07	0.0402814	0.51	0.403	0.00745396
Pafah1b3	6.69092e-10	0.0402257	0.164	0.105	1.51389e-05
Ldhd	9.64094e-10	0.0402134	0.033	0.011	2.18136e-05
Chmp1b	8.69268e-10	0.0401937	0.15	0.098	1.96681e-05
Setd1a	3.4334e-05	0.0401396	0.05	0.029	0.776841
Abhd14b	2.01799e-06	0.040077	0.036	0.017	0.045659
Ghdc	7.13186e-07	0.0400475	0.046	0.024	0.0161365
Perp	0.10268	0.0399861	0.007	0.003	1
Ap4b1	0.000167248	0.0399474	0.037	0.019	1
Pafah1b2	1.19338e-08	0.0399245	0.163	0.104	0.000270014
Glrx	0.000797617	0.0398598	0.462	0.399	1
Sec22c	6.72989e-07	0.0398239	0.029	0.011	0.015227
Tnks	1.47124e-05	0.0398145	0.116	0.08	0.332882
Mettl9	0.000115016	0.0397526	0.147	0.108	1
Zfyve26	0.00103196	0.0397361	0.057	0.037	1
Flt4	0.00203281	0.0396468	0.037	0.02	1
Brwd1	0.000814465	0.0395643	0.156	0.119	1
Etfrf1	1.43449e-07	0.0394468	0.07	0.04	0.00324568
Lemd2	8.57069e-09	0.0393946	0.225	0.155	0.000193921
Saa1	2.67536e-07	0.0392481	0.012	0.001	0.00605326
Fam126b	9.17647e-07	0.0392235	0.056	0.032	0.0207627
Naa80	4.96894e-06	0.0391841	0.041	0.021	0.112427
Hsd11b1	6.53534e-08	0.0391037	0.02	0.003	0.00147869
Itpr2	8.78217e-05	0.039044	0.249	0.186	1
Ikbkg	1.02932e-06	0.0390439	0.078	0.046	0.0232894
Gpr146	3.74301e-07	0.0390352	0.092	0.058	0.00846893
Gse1	1.46423e-09	0.0390212	0.127	0.089	3.31296e-05
Pde8b	1.51516e-07	0.0390011	0.039	0.015	0.0034282
Bmi1	3.0994e-09	0.0389485	0.074	0.04	7.0127e-05
G6pc3	9.49532e-10	0.0389179	0.108	0.063	2.14841e-05
Wdcp	5.22897e-05	0.0387182	0.045	0.024	1
Cpne3	3.39379e-06	0.0386965	0.218	0.157	0.0767879
Txnl1	8.69395e-07	0.0386122	0.388	0.309	0.0196709
Fmn1	0.000193115	0.0386054	0.085	0.06	1
Rrbp1	0.00243084	0.0386028	0.886	0.869	1
Ppp1r10	0.011142	0.0385677	0.157	0.132	1
Tent4b	9.81453e-05	0.0385146	0.112	0.08	1
Tbc1d24	0.000153946	0.0384851	0.038	0.02	1
Selenof	3.80188e-05	0.038459	0.577	0.49	0.860214
Atp5k	7.614e-06	0.0384004	0.532	0.428	0.172274
Sox4	0.0796582	0.0383517	0.024	0.017	1
Papss1	8.25205e-06	0.0382884	0.153	0.107	0.186711
Pilrb1	3.32844e-07	0.0382774	0.094	0.058	0.00753093
Zmiz1	0.00311981	0.0382658	0.367	0.294	1
Ttyh2	9.08343e-07	0.0382542	0.06	0.036	0.0205522
Epm2a	9.87252e-06	0.0382392	0.021	0.006	0.223376
Cd2	0.0522846	0.0382362	0.016	0.011	1
Sgsm2	0.00202822	0.0381399	0.033	0.02	1
Gm4951	4.2997e-09	0.0380187	0.287	0.214	9.72849e-05
Tigar	0.00115078	0.0380178	0.039	0.023	1
Btd	2.05012e-06	0.0380076	0.06	0.034	0.0463861
Gtf2h1	5.76534e-07	0.0379521	0.173	0.119	0.0130447
Arhgap23	0.000532949	0.0379366	0.025	0.012	1
Slc25a13	0.000269192	0.037934	0.045	0.027	1
Dnajc14	4.40681e-06	0.0379172	0.169	0.124	0.0997086
Abhd8	6.39815e-05	0.0378906	0.035	0.018	1
Tm2d3	2.73057e-10	0.0378606	0.199	0.134	6.17818e-06
Ankrd24	2.27145e-05	0.0378335	0.037	0.016	0.513938
Adhfe1	5.6953e-07	0.0377412	0.018	0.004	0.0128862
Rfx5	7.52899e-06	0.0376789	0.072	0.039	0.170351
Mast2	8.40795e-05	0.0376546	0.055	0.034	1
Klhl12	5.35428e-05	0.0375572	0.021	0.008	1
Hspe1	4.303e-05	0.0374476	0.555	0.448	0.973597
Numb	9.66432e-07	0.0374453	0.086	0.054	0.0218665
Wls	9.14096e-09	0.0374084	0.16	0.106	0.000206823
Zhx2	2.2703e-05	0.0373725	0.021	0.009	0.513679
Thap7	5.55002e-05	0.0373294	0.103	0.069	1
Pwwp3a	0.000208188	0.0372463	0.07	0.049	1
Slc52a2	9.3774e-06	0.0371484	0.06	0.036	0.212173
Isca2	9.65649e-05	0.0370986	0.096	0.062	1
Sh3glb1	0.0217437	0.037082	0.682	0.606	1
Pld2	0.000180722	0.0370084	0.092	0.065	1
Kdelr1	9.88193e-06	0.0369597	0.344	0.268	0.223589
Fcer1g	0.000465114	0.0369495	0.95	0.954	1
Prune1	0.000127338	0.0369379	0.034	0.017	1
Bcl2l2	7.16168e-06	0.0368651	0.065	0.035	0.16204
Il23r	1.88195e-09	0.0368356	0.018	0.002	4.25811e-05
S100a9	0.129345	0.0368321	0.02	0.018	1
Cpne5	0.040098	0.0368222	0.007	0.005	1
Larp1	4.38821e-07	0.0367196	0.329	0.247	0.00992876
Eml2	6.09122e-05	0.0367013	0.077	0.048	1
Abhd3	2.86805e-06	0.0366447	0.022	0.005	0.0648925
Tmem9b	6.61502e-09	0.0364254	0.147	0.101	0.000149671
D130040H23Rik	2.36449e-05	0.0364084	0.034	0.015	0.53499
Hmcn2	3.67635e-07	0.0364018	0.024	0.008	0.00831812
Gas2l1	8.88055e-07	0.0363604	0.107	0.072	0.0200931
Gnptab	7.02318e-08	0.0362494	0.227	0.165	0.00158906
Ptrh1	0.000115226	0.0362486	0.041	0.023	1
Rabggtb	9.85523e-07	0.0360478	0.152	0.099	0.0222984
Xpot	4.80705e-06	0.03601	0.114	0.077	0.108764
Hdgf	6.53667e-08	0.0360005	0.415	0.313	0.00147899
Rwdd1	3.39226e-06	0.0359672	0.333	0.264	0.0767534
Vapa	2.87443e-07	0.0359402	0.443	0.358	0.00650369
Rdh12	3.33946e-05	0.0358852	0.015	0.003	0.755585
S100pbp	0.000605937	0.0358531	0.041	0.023	1
Poglut1	2.99597e-07	0.0358181	0.111	0.072	0.00677868
Bola1	1.31539e-05	0.0357609	0.13	0.092	0.297621
Os9	5.59561e-05	0.0357604	0.368	0.291	1
Slc39a14	9.60308e-06	0.035608	0.064	0.041	0.217279
Sdhaf1	4.45473e-07	0.0355685	0.13	0.087	0.0100793
Eef1aknmt	0.0383312	0.0354386	0.039	0.03	1
Rragc	1.50991e-06	0.0353793	0.319	0.238	0.0341633
Lrba	0.000196171	0.0353223	0.057	0.038	1
H2-T24	8.16324e-05	0.0352045	0.063	0.04	1
Cmc4	0.000352545	0.0351933	0.033	0.017	1
Cnot7	0.00486113	0.035191	0.101	0.081	1
Ggnbp2	0.00743714	0.0351646	0.369	0.304	1
Pcbd2	7.45675e-06	0.0350194	0.222	0.165	0.168716
Wrap73	0.00159933	0.0350132	0.051	0.032	1
Fem1b	0.000107051	0.0350055	0.123	0.085	1
Tmem62	0.000259475	0.034841	0.029	0.014	1
Chd4	0.341116	0.0348382	0.612	0.544	1
Nudt19	5.73197e-05	0.0348026	0.187	0.131	1
Spcs1	1.5335e-07	0.0346761	0.402	0.319	0.00346969
Jmjd6	1.71258e-05	0.0346522	0.16	0.118	0.387489
Hist1h4i	1.35984e-06	0.0346334	0.042	0.02	0.0307677
Erlin2	0.000236047	0.0346007	0.099	0.065	1
Gab1	0.00497527	0.0345488	0.036	0.024	1
Slc5a6	1.09425e-06	0.0344848	0.028	0.009	0.0247585
Sphk2	1.06929e-05	0.0344687	0.147	0.103	0.241937
Tbc1d15	0.000221209	0.0344254	0.143	0.105	1
Dld	7.03334e-07	0.034274	0.193	0.142	0.0159136
Sestd1	5.08633e-06	0.0342584	0.114	0.076	0.115083
Slx1b	0.00138992	0.0342396	0.028	0.016	1
Arl3	1.04811e-09	0.0341883	0.126	0.08	2.37145e-05
Dnal4	0.00011961	0.0341872	0.072	0.043	1
Sh3bgrl2	0.00937592	0.0341637	0.017	0.009	1
Rps10	8.67785e-06	0.034161	0.469	0.374	0.196345
Rps6ka2	4.80577e-05	0.0341596	0.023	0.009	1
Tnfrsf1a	0.000461147	0.0341326	0.473	0.385	1
Tmub2	1.13185e-06	0.0341303	0.137	0.098	0.0256093
Kcnn3	0.0336386	0.0341196	0.007	0.004	1
Ubb	0.0792426	0.0339875	0.911	0.879	1
Tsen34	6.36364e-06	0.0337971	0.199	0.141	0.143984
Tmem184b	1.43014e-05	0.0337854	0.184	0.136	0.323583
Bcr	4.7493e-05	0.0337655	0.053	0.03	1
Zdhhc24	5.347e-05	0.0337381	0.022	0.008	1
Car13	2.53064e-05	0.0336401	0.036	0.017	0.572582
Atad1	9.76391e-07	0.033624	0.155	0.109	0.0220918
Pdcd1lg2	0.072959	0.0336012	0.039	0.029	1
Mapk8ip3	0.000904483	0.0335115	0.092	0.067	1
Tmem263	5.14555e-05	0.0333954	0.019	0.007	1
Apool	6.09533e-06	0.0333221	0.121	0.08	0.137913
Fbxl3	2.90319e-08	0.0332915	0.182	0.123	0.000656876
Tmem258	7.12987e-06	0.0332523	0.549	0.449	0.16132
Trio	0.045298	0.0332451	0.145	0.123	1
Gypc	8.81538e-06	0.0332223	0.028	0.012	0.199457
Hbb-bt	0.457418	0.0332053	0.008	0.006	1
Dtd1	4.44102e-07	0.0331619	0.068	0.039	0.0100482
Irak2	0.000110284	0.0331122	0.258	0.202	1
Bloc1s4	2.26274e-05	0.033102	0.124	0.085	0.511969
Ash1l	0.00080177	0.0330616	0.257	0.21	1
Spire1	0.000223606	0.0329572	0.054	0.028	1
Pld1	0.000316	0.0328476	0.059	0.037	1
Ier2	0.35962	0.0327322	0.557	0.544	1
Cript	2.47307e-06	0.0326884	0.269	0.208	0.0559557
Prr15	0.00134671	0.0326651	0.024	0.01	1
Fabp1	0.813177	0.0326632	0.011	0.013	1
Sun1	0.000821844	0.0326456	0.063	0.039	1
Dusp5	0.666329	0.0325928	0.113	0.111	1
Asah2	0.000577446	0.0325903	0.052	0.03	1
Cdc42bpg	0.0349693	0.0324827	0.034	0.025	1
E030030I06Rik	0.000276288	0.0324086	0.021	0.009	1
Cox6c	0.0159985	0.032379	0.843	0.795	1
Coa6	9.14699e-05	0.0323648	0.086	0.058	1
Sppl2a	1.08396e-06	0.0323379	0.527	0.434	0.0245258
Tstd2	2.19285e-06	0.0322906	0.062	0.037	0.0496153
Pamr1	3.99537e-06	0.0322655	0.012	0.001	0.0903993
Asxl1	0.0109227	0.0321457	0.079	0.057	1
Nme6	0.000114066	0.0321442	0.043	0.025	1
Ficd	0.000526895	0.0321293	0.022	0.008	1
Man2c1	0.000434163	0.032052	0.111	0.077	1
Trim13	1.66661e-06	0.032043	0.016	0.005	0.0377088
Stx4a	0.00035019	0.0320166	0.49	0.4	1
Mrm2	4.26534e-05	0.0319614	0.028	0.012	0.965076
Mthfs	0.00239553	0.0319369	0.056	0.038	1
Ap5s1	2.90604e-06	0.0319337	0.073	0.045	0.065752
Asb6	0.00222504	0.0318977	0.065	0.044	1
Kcmf1	1.82785e-05	0.0318824	0.28	0.21	0.41357
Mrpl14	1.53204e-05	0.0318721	0.342	0.264	0.34664
Smg8	0.000144299	0.0318663	0.038	0.023	1
Emc7	6.41237e-06	0.0318614	0.361	0.277	0.145086
Cox18	0.00820944	0.0318013	0.04	0.023	1
Mfsd5	2.04987e-06	0.0317796	0.198	0.14	0.0463803
Praf2	0.000809214	0.0317644	0.05	0.029	1
Ssh3	4.3565e-06	0.0316154	0.069	0.043	0.0985702
Tmem208	1.9308e-09	0.0315884	0.362	0.282	4.36863e-05
Mib2	8.76951e-05	0.0315124	0.065	0.043	1
Pank3	0.00105704	0.0315061	0.128	0.094	1
Ifi206	2.17249e-09	0.0314813	0.147	0.093	4.91549e-05
Smurf1	1.2759e-06	0.0314748	0.149	0.1	0.0288684
Lztfl1	4.37672e-06	0.0314326	0.134	0.093	0.0990277
Pqlc3	1.15921e-06	0.031417	0.171	0.12	0.0262284
Msr1	1.80957e-06	0.0313706	0.315	0.248	0.0409433
Msl1	1.62236e-05	0.0313612	0.263	0.206	0.367076
Metap1d	2.53921e-06	0.0313271	0.049	0.027	0.0574521
Smim26	4.89305e-07	0.0313214	0.149	0.101	0.011071
Fkbp1b	0.00662165	0.0313198	0.066	0.046	1
Stx6	0.000498376	0.0313188	0.122	0.087	1
Rcor3	0.00125922	0.0312802	0.055	0.037	1
Adam15	7.66044e-09	0.0312283	0.381	0.286	0.000173325
Tmem8	0.000229535	0.0311579	0.061	0.033	1
Tmx3	6.60277e-07	0.0311321	0.193	0.141	0.0149394
Abracl	0.00207689	0.0311171	0.717	0.637	1
Slc25a44	3.15921e-05	0.0310811	0.079	0.051	0.714803
Mfn1	0.00135506	0.0310734	0.059	0.041	1
Clec1a	0.256524	0.0310451	0.023	0.019	1
Ralgapa1	0.166703	0.0310308	0.072	0.063	1
Flvcr2	0.0234389	0.0310168	0.005	0.002	1
Fbxo28	0.000161318	0.0309863	0.094	0.064	1
Dhdds	5.03689e-05	0.0309806	0.1	0.067	1
Azi2	0.0258844	0.0309623	0.191	0.155	1
Mfhas1	0.00107529	0.0309568	0.097	0.065	1
Paqr7	0.00539513	0.0309336	0.064	0.045	1
Bclaf3	4.983e-05	0.0309305	0.042	0.029	1
Pik3cg	8.80773e-08	0.0308903	0.148	0.099	0.00199284
Ercc6l2	0.00538596	0.0307192	0.049	0.031	1
Rbfox2	1.37361e-05	0.0306772	0.017	0.004	0.310794
Tram2	0.000332704	0.0306456	0.049	0.028	1
Ankrd66	4.76749e-05	0.0306317	0.017	0.006	1
Cul4a	1.0617e-07	0.0306296	0.106	0.064	0.0024022
Ilvbl	8.35159e-09	0.0305642	0.159	0.107	0.000188963
Ctdnep1	0.000159464	0.0304192	0.302	0.232	1
Fam210a	0.000994052	0.0303514	0.078	0.055	1
Ccdc122	5.57279e-07	0.0303423	0.044	0.024	0.012609
Eif6	4.26683e-05	0.0303404	0.42	0.336	0.965413
Gtf3c4	0.00025804	0.0303266	0.04	0.025	1
Ghitm	0.000162864	0.0302208	0.422	0.334	1
Iars2	7.7823e-06	0.0300493	0.088	0.056	0.176082
Faf2	2.2022e-05	0.0299624	0.127	0.095	0.49827
Ap5z1	0.00107471	0.0297747	0.084	0.058	1
Vmn1r13	0.00357592	0.029773	0.013	0.004	1
Lrp11	2.43642e-07	0.0297598	0.024	0.008	0.00551263
Il18rap	0.000196236	0.0297349	0.018	0.008	1
Cd151	0.000124261	0.0297277	0.091	0.058	1
Abhd14a	0.00258435	0.0296997	0.024	0.011	1
Rnaseh2b	0.0241756	0.0296881	0.088	0.063	1
Dars2	0.0036766	0.0296473	0.033	0.02	1
Kif1a	0.000122255	0.0295943	0.025	0.012	1
Atg10	2.63433e-06	0.0295095	0.086	0.054	0.0596043
Zbtb8b	0.0110728	0.0295093	0.007	0.002	1
Alcam	6.32672e-05	0.0294965	0.114	0.084	1
Itga5	0.000163727	0.029455	0.196	0.148	1
Smad6	7.04596e-05	0.029363	0.028	0.011	1
Pex26	7.61763e-06	0.0293524	0.022	0.009	0.172356
Ear1	0.116899	0.0293476	0.008	0.005	1
Cep85	9.33883e-05	0.0293266	0.063	0.038	1
Osgin2	0.00692463	0.02929	0.149	0.122	1
Glis3	6.30911e-06	0.0292428	0.012	0.002	0.14275
Tmed7	3.44378e-07	0.0292383	0.346	0.264	0.00779189
Gm16181	0.000160717	0.0292332	0.017	0.007	1
Mfsd4b4	0.00881987	0.0291846	0.023	0.013	1
Cog4	1.20113e-06	0.0291794	0.074	0.047	0.0271769
Selenoi	0.000334518	0.0291445	0.073	0.047	1
P2rx5	0.000721974	0.029125	0.019	0.01	1
Tnpo1	1.92813e-07	0.0290893	0.286	0.209	0.00436259
Mrgpre	6.3913e-06	0.0290009	0.019	0.006	0.14461
Wdr61	1.17564e-05	0.0289575	0.134	0.096	0.266001
Aar2	2.33922e-05	0.0288717	0.095	0.069	0.529273
Rpain	0.000443517	0.0288498	0.091	0.065	1
BC048403	0.000482189	0.0288357	0.016	0.005	1
Casd1	1.00992e-06	0.0287668	0.112	0.075	0.0228504
Clybl	0.000485962	0.0287388	0.038	0.023	1
Plscr1	8.47012e-06	0.0286752	0.096	0.066	0.191645
Grpel2	0.000333107	0.0286598	0.038	0.019	1
Pcnx4	6.26009e-07	0.0286349	0.032	0.013	0.0141641
C2	0.0383276	0.0286316	0.019	0.016	1
Mbtps2	0.00442019	0.028592	0.055	0.036	1
Lcor	0.0240327	0.0285913	0.087	0.071	1
Lta4h	0.0213038	0.0285638	0.086	0.063	1
Peli2	9.57854e-06	0.0285318	0.048	0.027	0.216724
Wrnip1	0.000655843	0.0285268	0.046	0.027	1
Tlnrd1	0.010644	0.028506	0.081	0.063	1
Gm4841	0.010339	0.0284893	0.037	0.024	1
Kremen1	0.000309576	0.0284739	0.06	0.04	1
Mrtfb	0.000105091	0.0284682	0.051	0.033	1
Coq4	0.000866501	0.0284033	0.032	0.017	1
Adh5	3.11348e-05	0.0283616	0.273	0.207	0.704455
Dcbld2	1.90115e-05	0.0283545	0.022	0.007	0.430154
Tmem177	0.000546333	0.0283287	0.019	0.007	1
Slc30a4	3.12982e-07	0.0283135	0.037	0.017	0.00708153
Ccng1	4.68087e-07	0.0282307	0.236	0.171	0.0105909
Kazald1	0.0062489	0.0281903	0.007	0.002	1
Agap3	2.14807e-05	0.0281875	0.116	0.084	0.486023
Tmem237	0.00124134	0.0281812	0.06	0.036	1
Pwwp2b	0.000223789	0.028167	0.09	0.058	1
Prpf40b	6.60547e-06	0.0281393	0.02	0.007	0.149455
Gpr89	0.000259654	0.0280855	0.08	0.054	1
Cog6	0.000116065	0.0280387	0.035	0.018	1
Pex11g	0.000315889	0.0280382	0.029	0.016	1
Rela	1.20012e-05	0.0279599	0.325	0.25	0.27154
Farsb	2.19648e-05	0.0279346	0.122	0.088	0.496975
Cep57	1.4269e-06	0.0278552	0.083	0.055	0.0322849
Cmc2	2.77467e-07	0.0278113	0.138	0.094	0.00627798
Pafah2	9.27314e-05	0.0277917	0.017	0.006	1
Flrt3	0.0432764	0.0277902	0.008	0.004	1
Gfi1	7.98918e-06	0.0277861	0.015	0.003	0.180763
Dcaf1	0.000113833	0.0277437	0.046	0.029	1
Gm11808	3.85394e-05	0.0277308	0.253	0.194	0.871993
Zfp609	8.17635e-06	0.0276896	0.037	0.024	0.184998
Peli3	0.000146334	0.0276896	0.02	0.008	1
Zdhhc12	5.21264e-05	0.0276887	0.098	0.064	1
Lamp2	0.000206499	0.0276702	0.743	0.66	1
Sorbs1	0.000631637	0.027651	0.015	0.005	1
Snx25	0.00169308	0.0276375	0.027	0.013	1
Prrg2	0.0056864	0.0276109	0.1	0.072	1
Serpinb1b	2.54507e-05	0.0275835	0.022	0.009	0.575847
Nlrc4	0.00213601	0.0275245	0.063	0.045	1
Minpp1	3.29776e-08	0.0274719	0.181	0.129	0.000746151
Aasdh	0.0601328	0.0274652	0.038	0.03	1
Dlat	1.97775e-06	0.027427	0.132	0.092	0.0447485
Edem1	0.000164122	0.0273135	0.393	0.31	1
Pqlc2	0.00526234	0.0272824	0.068	0.047	1
Tet1	6.4619e-06	0.0272661	0.012	0.002	0.146207
Usp28	0.00439949	0.0272337	0.02	0.011	1
Foxred2	9.18134e-05	0.0272173	0.015	0.004	1
Pam	0.0115297	0.0272055	0.024	0.015	1
Htra2	1.04179e-07	0.0271479	0.268	0.199	0.00235716
Mcf2l	3.21265e-05	0.0270759	0.015	0.004	0.726893
Cry1	0.00146957	0.0270284	0.043	0.028	1
Fer	2.07601e-06	0.0270249	0.051	0.029	0.0469719
Zmym4	2.38816e-06	0.0269658	0.055	0.035	0.0540345
Hba-a2	0.71489	0.0269288	0.01	0.009	1
Hipk2	0.000114278	0.0269084	0.204	0.157	1
Ppp2r3d	0.046905	0.0269043	0.091	0.071	1
Tepsin	0.00498972	0.0268246	0.034	0.02	1
Uxt	0.000125947	0.0267635	0.09	0.06	1
Lpar1	0.00636491	0.0266823	0.023	0.011	1
Fuca2	5.82267e-08	0.0266504	0.289	0.219	0.00131744
Meak7	0.000378211	0.0265374	0.018	0.008	1
Synj2	0.000348506	0.0265055	0.061	0.045	1
Mpv17	3.00742e-05	0.0264793	0.075	0.048	0.680459
Abcc4	0.000395648	0.0264472	0.048	0.032	1
Fbf1	0.115906	0.0263943	0.032	0.022	1
Akt3	2.39483e-05	0.0262522	0.099	0.066	0.541854
Intu	0.000923665	0.0262326	0.021	0.009	1
Acad12	0.00039723	0.0262143	0.036	0.02	1
Pym1	0.000126142	0.0262121	0.041	0.026	1
Adamts14	4.62967e-06	0.0261799	0.01	0.001	0.104751
Spryd3	0.000830778	0.0261693	0.088	0.061	1
Tm7sf3	1.58355e-06	0.0261259	0.122	0.081	0.0358294
Gpr157	0.00382478	0.0261213	0.047	0.033	1
Tbc1d22b	0.0048569	0.0260412	0.049	0.032	1
Tfpt	0.00222206	0.0260164	0.045	0.028	1
Ywhag	5.06356e-06	0.0259964	0.434	0.347	0.114568
P3h3	0.000126019	0.0259928	0.049	0.027	1
Megf8	0.0201811	0.0259901	0.064	0.04	1
Tmem243	0.00019959	0.0259896	0.129	0.092	1
Mrpl54	1.93608e-05	0.0259785	0.374	0.293	0.438058
Exoc8	5.80075e-07	0.0259692	0.036	0.019	0.0131248
Fam3a	3.25759e-07	0.0259326	0.077	0.051	0.00737062
Slc38a10	5.76263e-07	0.0258784	0.258	0.183	0.0130385
Atraid	2.28551e-07	0.0258554	0.292	0.213	0.0051712
Tmem161b	0.00438396	0.0257316	0.035	0.021	1
Lpgat1	9.01804e-06	0.0256578	0.157	0.11	0.204042
Parp6	0.000288813	0.0256505	0.04	0.025	1
Mmgt2	0.000632524	0.0256447	0.046	0.027	1
Nkiras1	0.0141726	0.0256229	0.037	0.023	1
Hs1bp3	2.35908e-05	0.0255844	0.064	0.038	0.533766
Usp20	0.00046511	0.0255765	0.024	0.011	1
Auh	0.00213246	0.0255726	0.11	0.085	1
Prxl2c	0.000854058	0.0254995	0.076	0.05	1
Stfa3	0.00122494	0.0254723	0.005	0	1
2023-03-09	4.95484e-06	0.0254603	0.01	0	0.112108
Asxl2	6.49985e-05	0.0254534	0.129	0.098	1
Sos1	0.0251884	0.0254515	0.07	0.052	1
Creld2	6.51776e-06	0.025449	0.173	0.118	0.147471
Mpp5	0.00120682	0.0254211	0.051	0.032	1
Sirt2	5.9127e-05	0.0254066	0.217	0.166	1
Ppp1r37	0.000175254	0.0253899	0.107	0.074	1
Cacna1b	0.000112403	0.0253532	0.009	0.001	1
2310061I04Rik	0.000214371	0.025261	0.06	0.036	1
Chkb	0.116717	0.0252473	0.029	0.023	1
Pgam5	6.76737e-06	0.0251953	0.055	0.034	0.153119
Lysmd2	2.63742e-05	0.0251318	0.018	0.007	0.596743
Zbed3	2.50345e-07	0.0250783	0.023	0.009	0.00566431
Osbp	0.000141829	0.025054	0.099	0.065	1
Zfp653	0.0104857	0.0250021	0.035	0.021	1
Mecp2	0.000226389	0.02492	0.106	0.078	1
Sfxn3	0.000174764	0.0248988	0.139	0.11	1
Dnm3	1.76265e-06	0.0248894	0.015	0.003	0.0398818
Ifnar2	4.85667e-05	0.0248282	0.384	0.3	1
Fzr1	0.00907351	0.02465	0.108	0.084	1
Rbm12b2	0.039083	0.0246466	0.021	0.009	1
Dnmt3l	3.01806e-05	0.0246369	0.011	0.002	0.682866
Als2cl	0.000254625	0.0245977	0.025	0.014	1
Uck2	0.0103983	0.024558	0.044	0.032	1
Zfp445	0.00980036	0.0245142	0.115	0.091	1
Lonp2	9.70583e-06	0.02449	0.107	0.072	0.219604
Klkb1	0.0306227	0.0244661	0.016	0.009	1
Mapk7	0.0200486	0.0244305	0.061	0.042	1
Cfap298	5.54106e-05	0.0244023	0.055	0.032	1
Ndufaf2	3.01054e-05	0.024398	0.119	0.083	0.681164
Bbs5	3.27114e-06	0.024395	0.027	0.012	0.0740127
Tmem183a	1.93894e-05	0.0243545	0.138	0.098	0.438705
Mfap3l	9.89119e-07	0.0243283	0.011	0.002	0.0223798
Rpn2	3.10764e-05	0.0243282	0.545	0.44	0.703135
Cdkn2d	9.39517e-05	0.0242787	0.066	0.043	1
Glrx2	1.39358e-06	0.0242493	0.254	0.199	0.031531
Syne2	0.207146	0.0241098	0.021	0.025	1
Flywch2	6.7194e-07	0.024108	0.014	0.002	0.0152033
Mmgt1	0.000419234	0.0240969	0.038	0.024	1
Dedd	0.00159627	0.0240778	0.039	0.025	1
Celsr3	0.000238318	0.0240637	0.007	0	1
Agpat2	2.20489e-05	0.0240601	0.093	0.061	0.498878
Snx14	5.31138e-06	0.0240274	0.064	0.04	0.120175
Golga5	0.00180397	0.0240022	0.081	0.06	1
1110012L19Rik	1.99378e-05	0.0239759	0.058	0.036	0.451113
Rxylt1	1.10223e-06	0.0239739	0.125	0.082	0.0249391
2300009A05Rik	0.000817655	0.0239012	0.102	0.073	1
Rgl2	3.90375e-09	0.023879	0.225	0.162	8.83262e-05
Vps8	8.65609e-05	0.0238678	0.077	0.05	1
Flrt2	0.000259906	0.0238202	0.01	0.002	1
Apbb3	0.0764604	0.0238158	0.03	0.022	1
Ube2l3	0.000298919	0.0238138	0.559	0.466	1
Zfp518b	0.00364153	0.0237489	0.019	0.009	1
Dnajc16	4.13128e-05	0.0237451	0.07	0.045	0.934744
Flywch1	3.07531e-06	0.0237388	0.088	0.056	0.069582
Zfp574	0.000953031	0.0237378	0.023	0.011	1
Wnk2	2.97244e-06	0.0237267	0.012	0.001	0.0672545
Clcn4	0.00549537	0.0236843	0.256	0.215	1
Hist2h3c1	1.76853e-06	0.0236616	0.01	0.001	0.0400148
Dpagt1	0.000182347	0.0236294	0.114	0.081	1
Cul7	0.00052105	0.023612	0.037	0.018	1
Ncstn	6.69116e-06	0.0235678	0.219	0.162	0.151394
Ptges2	0.00191007	0.0235597	0.052	0.033	1
Pnpla6	0.00415524	0.023553	0.061	0.042	1
Stau1	1.03158e-07	0.0235403	0.139	0.092	0.00233406
Bbip1	5.84835e-06	0.023538	0.21	0.165	0.132325
Rab27a	1.07737e-05	0.0234764	0.074	0.045	0.243765
Lyrm4	0.0161307	0.0234627	0.02	0.011	1
Prkaa1	1.11647e-05	0.0234462	0.084	0.056	0.252613
Ablim2	0.000933062	0.0234239	0.013	0.004	1
Hacd4	2.14218e-09	0.023417	0.242	0.172	4.8469e-05
Mphosph8	2.88202e-11	0.0233986	0.202	0.141	6.52085e-07
Map4	4.68231e-06	0.0233779	0.334	0.257	0.105942
Zfp219	0.0351419	0.0233357	0.066	0.05	1
Fra10ac1	8.48033e-05	0.0233267	0.067	0.04	1
Traf5	2.38704e-07	0.0233233	0.11	0.072	0.00540091
[truncated: 20,629 more rows]
